# Supplementary material for: Identification of 3′ UTR motifs required for mRNA localization to myelin sheaths in vivo
Source: PLoS Biol. 2021 Jan 13;19(1):e3001053. doi: 10.1371/journal.pbio.3001053 (PMC7837478; doi:10.1371/journal.pbio.3001053)
Supplement: S4 Table — FIMO, Find Individual Motif Occurrences. (XLSX) [file pbio.3001053.s004.xlsx]

## Sheet: Sheet1
Supplement Table 4 - Gene list associated with Figure 8D. Gene list contains coordinates of motif 2 found in the 3' UTRs of myelin-localized genes.
GeneID	Gene_name	chrom	Gene_start	Gene_stop	TranscriptID	FIMO_start	FIMO_stop	strand	FIMO_score	p-value	q-value	Matched_sequence
ENSMUSG00000005983	1700037C18Rik	16	3895179	3908689	ENSMUST00000115859.7	1185	1210	+	6.76692	1.41e-06	0.0692	AAAAAAAAAAAAAAAACCCAAACAGG
ENSMUSG00000005983	1700037C18Rik	16	3895179	3908689	ENSMUST00000115859.7	1184	1209	+	5.91729	1.78e-06	0.0692	AAAAAAAAAAAAAAAAACCCAAACAG
ENSMUSG00000005983	1700037C18Rik	16	3895179	3908689	ENSMUST00000115859.7	1186	1211	+	-5.16541	5.32e-05	0.16	AAAAAAAAAAAAAAACCCAAACAGGC
ENSMUSG00000005983	1700037C18Rik	16	3895179	3908689	ENSMUST00000115859.7	1191	1216	+	-2.14286	2.12e-05	0.103	AAAAAAAAAACCCAAACAGGCCAGTG
ENSMUSG00000005983	1700037C18Rik	16	3895179	3908689	ENSMUST00000115859.7	1183	1208	+	-7.31579	8.88e-05	0.177	AAAAAAAAAAAAAAAAAACCCAAACA
ENSMUSG00000020807	4933427D14Rik	11	72153929	72207459	ENSMUST00000142530.7	3034	3059	+	-7.04511	8.33e-05	0.177	ATTAAAAAAAAATAAACTCAGTATTT
ENSMUSG00000004360	9330159F19Rik	10	29211606	29230779	ENSMUST00000092627.5	3254	3279	+	2.98496	4.83e-06	0.0794	TTAAAACAAAGCAAAGCATTGAATTC
ENSMUSG00000047228	A2ml1	6	128539821	128581608	ENSMUST00000060574.8	21	46	+	-3.44361	3.2e-05	0.133	AAAAGAAAAAAAAAAGTATGAGACTA
ENSMUSG00000057715	A830018L16Rik	1	11414105	11975901	ENSMUST00000135014.7	4535	4560	+	-1.57895	1.79e-05	0.0951	TTAAAAAAACAAAAAACCTTAGAAAG
ENSMUSG00000057715	A830018L16Rik	1	11414105	11975901	ENSMUST00000135014.7	4865	4890	+	3.03759	4.75e-06	0.0794	AACAAAACAAAAAAAATGTGGAGGAG
ENSMUSG00000025085	Ablim1	19	57032733	57314919	ENSMUST00000079360.11	740	765	+	-0.631579	1.39e-05	0.088	TCCAAAGAAAGGAAAGACAAAAAGAG
ENSMUSG00000044573	Acp1	12	30893326	30911589	ENSMUST00000062740.14	262	287	+	-7.32331	8.89e-05	0.177	AACAAAAGAAAACAAAAACAAAAACA
ENSMUSG00000044573	Acp1	12	30893326	30911589	ENSMUST00000062740.14	605	630	+	-7.21053	8.67e-05	0.177	AACAAAAATAACAACGGATGGGAGCA
ENSMUSG00000044573	Acp1	12	30893326	30911589	ENSMUST00000062740.14	277	302	+	0.496241	1.04e-05	0.0846	AAACAAAAACAAAAACCCAGAAAGTA
ENSMUSG00000044573	Acp1	12	30893326	30911589	ENSMUST00000062740.14	276	301	+	-3.93985	3.78e-05	0.146	AAAACAAAAACAAAAACCCAGAAAGT
ENSMUSG00000044573	Acp1	12	30893326	30911589	ENSMUST00000062740.14	2482	2507	+	-7.64662	9.52e-05	0.177	GAAAATGCAAAGGAATTATGGAAGAG
ENSMUSG00000015143	Actn1	12	80167547	80260371	ENSMUST00000021554.15	246	271	+	-7.40602	9.03e-05	0.177	GAAAAAAAAAAACAAACAAAAAACTA
ENSMUSG00000015143	Actn1	12	80167547	80260371	ENSMUST00000021554.15	704	729	+	-2.78195	2.57e-05	0.114	ATTAAAGATAGGACAAACTTGGAGAT
ENSMUSG00000015143	Actn1	12	80167547	80260371	ENSMUST00000021554.15	202	227	+	-6.05263	6.63e-05	0.168	AAAAAGGATAAAAAAAAAGTTACGTT
ENSMUSG00000020262	Adarb1	10	77290726	77418270	ENSMUST00000126073.7	4224	4249	+	-5.3985	5.69e-05	0.165	CAGAAAGGAGGGAGAGTCAGGAAGTA
ENSMUSG00000020262	Adarb1	10	77290726	77418270	ENSMUST00000126073.7	3951	3976	+	-5.26316	5.48e-05	0.163	TAGAAAGAAAAACACACACGATGGTG
ENSMUSG00000020431	Adcy1	11	7063489	7178506	ENSMUST00000020706.4	8332	8357	+	-6.45865	7.33e-05	0.172	AAAAAAAAAAAGAAAAGAAAAAAAAA
ENSMUSG00000020431	Adcy1	11	7063489	7178506	ENSMUST00000020706.4	8341	8366	+	2.78195	5.25e-06	0.0794	AAGAAAAGAAAAAAAAAAGGCATGTG
ENSMUSG00000020431	Adcy1	11	7063489	7178506	ENSMUST00000020706.4	8337	8362	+	-4.04511	3.89e-05	0.146	AAAAAAGAAAAGAAAAAAAAAAGGCA
ENSMUSG00000020431	Adcy1	11	7063489	7178506	ENSMUST00000020706.4	8333	8358	+	-6.72932	7.72e-05	0.172	AAAAAAAAAAGAAAAGAAAAAAAAAA
ENSMUSG00000020431	Adcy1	11	7063489	7178506	ENSMUST00000020706.4	8336	8361	+	-5.73684	6.19e-05	0.166	AAAAAAAGAAAAGAAAAAAAAAAGGC
ENSMUSG00000024256	Adcyap1	17	93199017	93206537	ENSMUST00000234081.1	1690	1715	+	1.34586	8.26e-06	0.0802	AAAAAAAAGAAAAAAACACATTAGTT
ENSMUSG00000024256	Adcyap1	17	93199017	93206537	ENSMUST00000234081.1	1682	1707	+	-6.45865	7.33e-05	0.172	AAAAAAGAAAAAAAAAGAAAAAAACA
ENSMUSG00000024256	Adcyap1	17	93199017	93206537	ENSMUST00000234081.1	1663	1688	+	-3.60902	3.36e-05	0.134	AAAAAAAACAACAAAACCAAAAAAAG
ENSMUSG00000024256	Adcyap1	17	93199017	93206537	ENSMUST00000234081.1	1692	1717	+	6.87218	1.37e-06	0.0692	AAAAAAGAAAAAAACACATTAGTTTG
ENSMUSG00000028184	Adgrl2	3	148815583	148990555	ENSMUST00000200216.4	980	1005	+	-7.40602	9.03e-05	0.177	AAAAAAGAAATGCCAACCAGGTATTT
ENSMUSG00000028184	Adgrl2	3	148815583	148990555	ENSMUST00000200216.4	1834	1859	+	-7.78947	9.87e-05	0.177	AATAAAAATAAAATAAAACAGAAATA
ENSMUSG00000028184	Adgrl2	3	148815583	148990555	ENSMUST00000200216.4	1701	1726	+	-7.75188	9.76e-05	0.177	CACAAATGTGGGGAAATCTGGAGGTC
ENSMUSG00000015961	Adss	1	177762962	177796511	ENSMUST00000016105.8	74	99	+	-2.53383	2.38e-05	0.11	AATTCAAGAATAAAGACATTGAAATG
ENSMUSG00000019986	Ahi1	10	20952547	21080429	ENSMUST00000213104.1	644	669	+	-6.65414	7.62e-05	0.172	AGCCAATAGAGAAAACCCCAGAACTG
ENSMUSG00000019986	Ahi1	10	20952547	21080429	ENSMUST00000213104.1	517	542	+	-5.10526	5.26e-05	0.16	CTAAAAAGAAAAAAATCACTGTGGCC
ENSMUSG00000078307	AI593442	9	52673042	52679780	ENSMUST00000213937.1	1433	1458	+	-2.24812	2.19e-05	0.104	ACAACAGAAAACAAATAATGGATGTG
ENSMUSG00000039546	Ajap1	4	153373221	153482811	ENSMUST00000105646.2	608	633	+	-4.15038	4.01e-05	0.147	TAAAAAGAAAAAGAAAAAAAGAATTG
ENSMUSG00000039546	Ajap1	4	153373221	153482811	ENSMUST00000105646.2	613	638	+	-5.93233	6.46e-05	0.166	AGAAAAAGAAAAAAAGAATTGTGTTC
ENSMUSG00000039546	Ajap1	4	153373221	153482811	ENSMUST00000105646.2	610	635	+	-5.1203	5.28e-05	0.16	AAAAGAAAAAGAAAAAAAGAATTGTG
ENSMUSG00000028527	Ak4	4	101419277	101466995	ENSMUST00000102780.7	1751	1776	+	4.68421	2.61e-06	0.0794	AAGAGAGGTAGGAAAACTTCAAACTT
ENSMUSG00000021057	Akap5	12	76324891	76334153	ENSMUST00000095610.8	2299	2324	+	-3.65414	3.43e-05	0.136	TAAAAATAAGAGATGGCTTGGAAGTC
ENSMUSG00000002661	Alkbh7	17	56997339	56999322	ENSMUST00000002737.6	202	227	+	-5.12782	5.29e-05	0.16	TAAAAAAAAAAAAAAACTAACAAGCA
ENSMUSG00000002661	Alkbh7	17	56997339	56999322	ENSMUST00000002737.6	200	225	+	-2.7218	2.53e-05	0.113	ATTAAAAAAAAAAAAAAACTAACAAG
ENSMUSG00000057766	Ankrd29	18	12252362	12305797	ENSMUST00000118525.8	647	672	+	5.97744	1.75e-06	0.0692	AAAAAAAAAAAAAAAACCTCAACTTT
ENSMUSG00000057766	Ankrd29	18	12252362	12305797	ENSMUST00000118525.8	646	671	+	5.96241	1.76e-06	0.0692	AAAAAAAAAAAAAAAAACCTCAACTT
ENSMUSG00000057766	Ankrd29	18	12252362	12305797	ENSMUST00000118525.8	648	673	+	-7.65414	9.54e-05	0.177	AAAAAAAAAAAAAAACCTCAACTTTT
ENSMUSG00000045034	Ankrd34b	13	92425896	92441658	ENSMUST00000061594.12	1144	1169	+	-6.29323	7.04e-05	0.171	AAAAAAAAAAAAGAAACAATGATTAA
ENSMUSG00000074968	Ano3	2	110655201	110950923	ENSMUST00000099623.9	2004	2029	+	-5.93985	6.47e-05	0.166	ATGAAAATTAAATGAAGTATGAAGTG
ENSMUSG00000031731	Ap1g1	8	109778554	109864204	ENSMUST00000093157.12	3497	3522	+	-5.82707	6.32e-05	0.166	TTAAACAGAAGAAAAAGCTGAAGCGG
ENSMUSG00000019979	Apaf1	10	90989311	91082770	ENSMUST00000159110.7	2102	2127	+	-5.83459	6.33e-05	0.166	AAAACAAAAATAAAATTACTGAAATT
ENSMUSG00000042797	Aqp11	7	97724006	97738289	ENSMUST00000206389.1	1879	1904	+	-7.40602	9.03e-05	0.177	TAAAAAAAAAAAAAAACAAAAACATT
ENSMUSG00000024411	Aqp4	18	15389496	15410982	ENSMUST00000079081.7	623	648	+	-5.08271	5.23e-05	0.16	AAAAAAAATAGGAAAAAATATTAATT
ENSMUSG00000036452	Arhgap26	18	38993145	39376284	ENSMUST00000097593.8	980	1005	+	3.06767	4.7e-06	0.0794	AACAAAAAGAGGGAATCATTAAATAG
ENSMUSG00000032875	Arhgef17	7	100869752	100932107	ENSMUST00000107032.2	1652	1677	+	-7.41353	9.05e-05	0.177	ACACAAGACTGCAAAGGATTTAAGTG
ENSMUSG00000021895	Arhgef3	14	27114899	27403911	ENSMUST00000224981.1	1014	1039	+	-1.94737	1.98e-05	0.0976	AAACAAGAGAGAAGGACTTGGGGGTG
ENSMUSG00000017418	Arl5b	2	15049395	15082456	ENSMUST00000069870.10	4987	5012	+	-1.39098	1.7e-05	0.0938	AGAAAGGAGAGGAAAGGTCTGCAGTT
ENSMUSG00000071324	Armc2	10	41914990	42018442	ENSMUST00000161927.7	445	470	+	-1.12782	1.57e-05	0.0902	TAGAAAACGAAGAAGACATTGAAGAG
ENSMUSG00000032503	Arpp21	9	112065091	112235938	ENSMUST00000172380.9	742	767	+	-6.53383	7.44e-05	0.172	CAAAAGAAAAAAAAATCCTTATAGAT
ENSMUSG00000032503	Arpp21	9	112065091	112235938	ENSMUST00000172380.9	69	94	+	3.24812	4.39e-06	0.0794	ATAAAAATCCAGTAAGCACGGTAGTG
ENSMUSG00000028207	Asph	4	9448069	9669344	ENSMUST00000078139.12	4183	4208	+	-6.93985	8.12e-05	0.175	ATAAAAATAAAGGTAATTCGAAAGAT
ENSMUSG00000028207	Asph	4	9448069	9669344	ENSMUST00000078139.12	235	260	+	-7.37594	8.98e-05	0.177	TTTAAGGGGCAGAAAACTTGGTTGTG
ENSMUSG00000021619	Atg10	13	90935356	91223968	ENSMUST00000022119.5	466	491	+	-5.50376	5.87e-05	0.166	CAAAAAAAAAAAAAAGTGTGTGTGTG
ENSMUSG00000021619	Atg10	13	90935356	91223968	ENSMUST00000022119.5	464	489	+	-4.79699	4.87e-05	0.159	ACCAAAAAAAAAAAAAAGTGTGTGTG
ENSMUSG00000021066	Atl1	12	69892614	69966417	ENSMUST00000021466.9	1928	1953	+	-6.35338	7.16e-05	0.172	AAGAAAAATAGGAAGGAATGACAGCC
ENSMUSG00000038094	Atp13a4	16	29395853	29544864	ENSMUST00000182013.7	22	47	+	-3.90977	3.74e-05	0.145	ATCTAAAGGTGAGATACATAAAAGTG
ENSMUSG00000026576	Atp1b1	1	164437109	164458355	ENSMUST00000027863.12	42	67	+	-2.81203	2.61e-05	0.115	AAAAAAGATACACAAACCTACTAGTC
ENSMUSG00000019943	Atp2b1	10	98914406	99026143	ENSMUST00000020107.7	703	728	+	-1.62406	1.81e-05	0.0951	AAAAAAACAACAAAAACCATGAGCAG
ENSMUSG00000019943	Atp2b1	10	98914406	99026143	ENSMUST00000020107.7	677	702	+	-6.45865	7.33e-05	0.172	AAAAGAAAAAAGAAAACAAGACAAAA
ENSMUSG00000019943	Atp2b1	10	98914406	99026143	ENSMUST00000020107.7	2455	2480	+	0.744361	9.73e-06	0.0833	AAAAAAAAAAAAAATACAAGCAAGCT
ENSMUSG00000030302	Atp2b2	6	113743831	114042613	ENSMUST00000101045.9	2104	2129	+	-1.82707	1.91e-05	0.0957	CTATAAGGAAGAATATCTCTGAAGGA
ENSMUSG00000026463	Atp2b4	1	133699457	133801041	ENSMUST00000143567.7	3709	3734	+	-1.26316	1.64e-05	0.0918	ATCAAAGCAATGTATACCCTAGCGTG
ENSMUSG00000026463	Atp2b4	1	133699457	133801041	ENSMUST00000143567.7	5324	5349	+	-5.12782	5.29e-05	0.16	AAAAACAAAACAACAACAACAAAGTT
ENSMUSG00000026463	Atp2b4	1	133699457	133801041	ENSMUST00000143567.7	3660	3685	+	-7.62406	9.46e-05	0.177	ACAAAAAGAAAAAAAAATTGACTTTT
ENSMUSG00000026463	Atp2b4	1	133699457	133801041	ENSMUST00000143567.7	3659	3684	+	-0.879699	1.47e-05	0.0881	AACAAAAAGAAAAAAAAATTGACTTT
ENSMUSG00000026463	Atp2b4	1	133699457	133801041	ENSMUST00000143567.7	4999	5024	+	-4.31579	4.19e-05	0.15	AGAAAAAGAAGAAGAAAAAGAAAAGG
ENSMUSG00000026463	Atp2b4	1	133699457	133801041	ENSMUST00000143567.7	4975	5000	+	-4.69173	4.72e-05	0.158	AAGAAGAAGAAGAAAGAATGGAAAAG
ENSMUSG00000006057	Atp5g1	11	96068852	96075670	ENSMUST00000090541.11	3899	3924	+	-5.54887	5.92e-05	0.166	AAAAAGAAAAAGAAGAAATTCAAGGC
ENSMUSG00000039182	AW209491	13	14630154	14639096	ENSMUST00000038690.5	463	488	+	-4.42105	4.34e-05	0.152	ATTAATGGAAAGAAAGTCCTAAAAAC
ENSMUSG00000039182	AW209491	13	14630154	14639096	ENSMUST00000038690.5	156	181	+	-5.88722	6.39e-05	0.166	AGAAAAAAAAAAAAAACCCAATTGAC
ENSMUSG00000039182	AW209491	13	14630154	14639096	ENSMUST00000038690.5	154	179	+	-7.78195	9.85e-05	0.177	TTAGAAAAAAAAAAAAAACCCAATTG
ENSMUSG00000050538	B230217C12Rik	11	97840780	97844099	ENSMUST00000155954.2	947	972	+	-7.54135	9.29e-05	0.177	TAAACAAGAAAAAAAGAATGAATGAA
ENSMUSG00000056124	B4galt6	18	20684599	20746404	ENSMUST00000070080.5	3183	3208	+	-7.67669	9.57e-05	0.177	AAAAAAAAGAAAAAAAAAGAAAACTA
ENSMUSG00000056124	B4galt6	18	20684599	20746404	ENSMUST00000070080.5	3172	3197	+	-2.38346	2.28e-05	0.107	AAAAAAAAAAAAAAAAAAAGAAAAAA
ENSMUSG00000056124	B4galt6	18	20684599	20746404	ENSMUST00000070080.5	3178	3203	+	-7.42857	9.08e-05	0.177	AAAAAAAAAAAAAGAAAAAAAAAGAA
ENSMUSG00000056124	B4galt6	18	20684599	20746404	ENSMUST00000070080.5	3188	3213	+	-3.04511	2.83e-05	0.122	AAAGAAAAAAAAAGAAAACTAAAATT
ENSMUSG00000056124	B4galt6	18	20684599	20746404	ENSMUST00000070080.5	3171	3196	+	-6.45865	7.33e-05	0.172	AAAAAAAAAAAAAAAAAAAAGAAAAA
ENSMUSG00000056124	B4galt6	18	20684599	20746404	ENSMUST00000070080.5	3189	3214	+	-7.52632	9.27e-05	0.177	AAGAAAAAAAAAGAAAACTAAAATTC
ENSMUSG00000056124	B4galt6	18	20684599	20746404	ENSMUST00000070080.5	3168	3193	+	-0.81203	1.45e-05	0.088	AAAAAAAAAAAAAAAAAAAAAAAGAA
ENSMUSG00000056124	B4galt6	18	20684599	20746404	ENSMUST00000070080.5	3176	3201	+	-1.08271	1.55e-05	0.0897	AAAAAAAAAAAAAAAGAAAAAAAAAG
ENSMUSG00000056124	B4galt6	18	20684599	20746404	ENSMUST00000070080.5	3166	3191	+	-0.81203	1.45e-05	0.088	AAAAAAAAAAAAAAAAAAAAAAAAAG
ENSMUSG00000056124	B4galt6	18	20684599	20746404	ENSMUST00000070080.5	3181	3206	+	-4.76692	4.83e-05	0.159	AAAAAAAAAAGAAAAAAAAAGAAAAC
ENSMUSG00000022296	Baalc	15	38933144	38952912	ENSMUST00000226440.1	158	183	+	-5.2406	5.45e-05	0.163	AAAATACATCGAAAAGTCCTGAAATA
ENSMUSG00000037316	Bag4	8	25764538	25785287	ENSMUST00000038498.9	1961	1986	+	-7.12782	8.47e-05	0.177	ATATAGCCTAGGACAACCTAGAAGTT
ENSMUSG00000037316	Bag4	8	25764538	25785287	ENSMUST00000038498.9	140	165	+	-7.82707	9.93e-05	0.177	GGAAAAAACTGGAAAAGCCGGCAGAG
ENSMUSG00000037316	Bag4	8	25764538	25785287	ENSMUST00000038498.9	3146	3171	+	-6.95489	8.14e-05	0.175	ATCAAAGAAAAAAAAAAGCAACATTT
ENSMUSG00000045763	Basp1	15	25363277	25413764	ENSMUST00000058845.8	859	884	+	-2.78947	2.58e-05	0.114	TAAAAAAATAAAAAAAATGTACAATG
ENSMUSG00000045763	Basp1	15	25363277	25413764	ENSMUST00000058845.8	749	774	+	-5.26316	5.48e-05	0.163	AATAAAAAATAAAAAAAAAAGAAGTC
ENSMUSG00000045763	Basp1	15	25363277	25413764	ENSMUST00000058845.8	167	192	+	1.49624	7.91e-06	0.0794	AAAGAAAAGAGAAAAAAAATAAAGAG
ENSMUSG00000000861	Bcl11a	11	24078056	24174123	ENSMUST00000109514.7	2751	2776	+	-5.61654	6.04e-05	0.166	AAAGAAAGAAAAAAAAAAAGGAAAAA
ENSMUSG00000000861	Bcl11a	11	24078056	24174123	ENSMUST00000109514.7	2747	2772	+	-4.04511	3.89e-05	0.146	AAAGAAAGAAAGAAAAAAAAAAAGGA
ENSMUSG00000000861	Bcl11a	11	24078056	24174123	ENSMUST00000109514.7	2167	2192	+	-5.28571	5.5e-05	0.163	AACAAAACAAAAAAAAAACATACATG
ENSMUSG00000000861	Bcl11a	11	24078056	24174123	ENSMUST00000109514.7	2772	2797	+	-4.1203	3.98e-05	0.147	AAAAAAAAAACAACAACAATGTTTTG
ENSMUSG00000000861	Bcl11a	11	24078056	24174123	ENSMUST00000109514.7	2752	2777	+	-6.72932	7.72e-05	0.172	AAGAAAGAAAAAAAAAAAGGAAAAAA
ENSMUSG00000000861	Bcl11a	11	24078056	24174123	ENSMUST00000109514.7	1397	1422	+	5.74436	1.86e-06	0.0692	AAAAAGAAGAGGAAGACCTTTAAGAG
ENSMUSG00000000861	Bcl11a	11	24078056	24174123	ENSMUST00000109514.7	2169	2194	+	-4.98496	5.1e-05	0.16	CAAAACAAAAAAAAAACATACATGGG
ENSMUSG00000000861	Bcl11a	11	24078056	24174123	ENSMUST00000109514.7	1801	1826	+	-4.8797	4.97e-05	0.16	AAAAAAAACAAGCAAACCTAAAAAAA
ENSMUSG00000000861	Bcl11a	11	24078056	24174123	ENSMUST00000109514.7	651	676	+	-1.83459	1.91e-05	0.0958	GGAGAGGGAAAAAAGGCCTTGAATTG
ENSMUSG00000000861	Bcl11a	11	24078056	24174123	ENSMUST00000109514.7	2764	2789	+	-5.48872	5.85e-05	0.166	AAAAAAGGAAAAAAAAAACAACAACA
ENSMUSG00000048251	Bcl11b	12	107910403	108003602	ENSMUST00000066060.10	2776	2801	+	-7.18045	8.61e-05	0.177	AAAAAGAGAAAAAAAAAACAAAAACA
ENSMUSG00000048251	Bcl11b	12	107910403	108003602	ENSMUST00000066060.10	183	208	+	-7.80451	9.89e-05	0.177	ATTAAAAAAAAAAAAACAAAAAAACA
ENSMUSG00000048251	Bcl11b	12	107910403	108003602	ENSMUST00000066060.10	198	223	+	-5.90977	6.42e-05	0.166	ACAAAAAAACAAAAAAATTTGTGGAG
ENSMUSG00000048251	Bcl11b	12	107910403	108003602	ENSMUST00000066060.10	189	214	+	-7.31579	8.88e-05	0.177	AAAAAAAAAACAAAAAAACAAAAAAA
ENSMUSG00000048251	Bcl11b	12	107910403	108003602	ENSMUST00000066060.10	191	216	+	-0.210526	1.24e-05	0.0874	AAAAAAAACAAAAAAACAAAAAAATT
ENSMUSG00000022508	Bcl6	16	23965052	23988852	ENSMUST00000023151.5	1046	1071	+	-4.1203	3.98e-05	0.147	AAACATAAGAATAAAACATTGAAAAG
ENSMUSG00000042182	Bend6	1	33852052	33907816	ENSMUST00000129464.7	1141	1166	+	-7.69925	9.61e-05	0.177	AGCTTGGGAAGGAGGATTTTAAAGTG
ENSMUSG00000025128	Bhlhe22	3	18054174	18057517	ENSMUST00000026120.7	1311	1336	+	-5.48872	5.85e-05	0.166	AAATAAAATTTAAAAGACATGAAATG
ENSMUSG00000025217	Btrc	19	45363734	45530013	ENSMUST00000224102.1	294	319	+	-3.66165	3.44e-05	0.137	AAAAAGCACAGAAAAACTTGTAATTT
ENSMUSG00000019146	Cacng2	15	77991748	78120028	ENSMUST00000019290.2	430	455	+	-7.40602	9.03e-05	0.177	CAAAAAAAAAAAATAACAAAAAAATA
ENSMUSG00000019146	Cacng2	15	77991748	78120028	ENSMUST00000019290.2	458	483	+	4.33083	2.98e-06	0.0794	AAAAAAATGAGGAAAGCAAGAGAGTA
ENSMUSG00000019146	Cacng2	15	77991748	78120028	ENSMUST00000019290.2	441	466	+	-6.10526	6.73e-05	0.168	AATAACAAAAAAATAACAAAAAAATG
ENSMUSG00000019146	Cacng2	15	77991748	78120028	ENSMUST00000019290.2	560	585	+	-3.98496	3.83e-05	0.146	AAAAAAAATAAAAATAAATTAAAAAA
ENSMUSG00000019146	Cacng2	15	77991748	78120028	ENSMUST00000019290.2	141	166	+	-6.84962	7.93e-05	0.174	AACAAAAAACAAAACAAAAAAAAGAG
ENSMUSG00000019146	Cacng2	15	77991748	78120028	ENSMUST00000019290.2	139	164	+	-5.02256	5.15e-05	0.16	AAAACAAAAAACAAAACAAAAAAAAG
ENSMUSG00000019146	Cacng2	15	77991748	78120028	ENSMUST00000019290.2	3231	3256	+	-7.54887	9.3e-05	0.177	CAAAAAAACAAAAAAACACCAACTTC
ENSMUSG00000019146	Cacng2	15	77991748	78120028	ENSMUST00000019290.2	1273	1298	+	-0.902256	1.48e-05	0.0881	AAAAGAAAAAGGAAAAACAAGTGGTG
ENSMUSG00000019146	Cacng2	15	77991748	78120028	ENSMUST00000019290.2	3215	3240	+	-7.44361	9.1e-05	0.177	AACAAAAAACAAAAAACAAAAAAACA
ENSMUSG00000019146	Cacng2	15	77991748	78120028	ENSMUST00000019290.2	3298	3323	+	-1.67669	1.83e-05	0.0952	TTAACAGAAAAAAAAATTTTAAAAAG
ENSMUSG00000019146	Cacng2	15	77991748	78120028	ENSMUST00000019290.2	3206	3231	+	-7.45865	9.13e-05	0.177	AACAAAAAAAACAAAAAACAAAAAAC
ENSMUSG00000019146	Cacng2	15	77991748	78120028	ENSMUST00000019290.2	157	182	+	-4.66165	4.69e-05	0.157	AAAAAAAGAGAAAAACATAGCAAGTA
ENSMUSG00000019146	Cacng2	15	77991748	78120028	ENSMUST00000019290.2	156	181	+	-4.02256	3.87e-05	0.146	AAAAAAAAGAGAAAAACATAGCAAGT
ENSMUSG00000019146	Cacng2	15	77991748	78120028	ENSMUST00000019290.2	384	409	+	-3.57143	3.34e-05	0.134	AAAAATAAAAGGGAACCAAGATAATG
ENSMUSG00000019146	Cacng2	15	77991748	78120028	ENSMUST00000019290.2	1507	1532	+	0.443609	1.06e-05	0.0854	AACAAATATAGAAATCCATTAAAATA
ENSMUSG00000019146	Cacng2	15	77991748	78120028	ENSMUST00000019290.2	190	215	+	-4.03008	3.88e-05	0.146	AAAAAAAAAAGAACAAACTACAAGAA
ENSMUSG00000054423	Cadps	14	12372563	12823079	ENSMUST00000224882.1	1380	1405	+	-7.40602	9.03e-05	0.177	AAATAAAAACAAAAAACAAAAAACTT
ENSMUSG00000054423	Cadps	14	12372563	12823079	ENSMUST00000224882.1	130	155	+	-7.34586	8.92e-05	0.177	AATAAATAGAAGAAATCTCAGAAGAC
ENSMUSG00000054423	Cadps	14	12372563	12823079	ENSMUST00000224882.1	1387	1412	+	-0.714286	1.42e-05	0.088	AACAAAAAACAAAAAACTTTGCGATC
ENSMUSG00000017978	Cadps2	6	23262773	23839421	ENSMUST00000115356.2	1061	1086	+	1.45113	7.98e-06	0.0794	AAAGAAAGAAAGAAAGAAAGAAAGAA
ENSMUSG00000017978	Cadps2	6	23262773	23839421	ENSMUST00000115356.2	1017	1042	+	1.45113	7.98e-06	0.0794	AAAGAAAGAAAGAAAGAAAGAAAGAA
ENSMUSG00000017978	Cadps2	6	23262773	23839421	ENSMUST00000115356.2	1025	1050	+	1.45113	7.98e-06	0.0794	AAAGAAAGAAAGAAAGAAAGAAAGAA
ENSMUSG00000017978	Cadps2	6	23262773	23839421	ENSMUST00000115356.2	1073	1098	+	1.45113	7.98e-06	0.0794	AAAGAAAGAAAGAAAGAAAGAAAGAA
ENSMUSG00000017978	Cadps2	6	23262773	23839421	ENSMUST00000115356.2	1069	1094	+	1.45113	7.98e-06	0.0794	AAAGAAAGAAAGAAAGAAAGAAAGAA
ENSMUSG00000017978	Cadps2	6	23262773	23839421	ENSMUST00000115356.2	1041	1066	+	1.45113	7.98e-06	0.0794	AAAGAAAGAAAGAAAGAAAGAAAGAA
ENSMUSG00000017978	Cadps2	6	23262773	23839421	ENSMUST00000115356.2	1029	1054	+	1.45113	7.98e-06	0.0794	AAAGAAAGAAAGAAAGAAAGAAAGAA
ENSMUSG00000017978	Cadps2	6	23262773	23839421	ENSMUST00000115356.2	1013	1038	+	1.45113	7.98e-06	0.0794	CAAAAAAGAAAGAAAGAAAGAAAGAA
ENSMUSG00000017978	Cadps2	6	23262773	23839421	ENSMUST00000115356.2	1033	1058	+	1.45113	7.98e-06	0.0794	AAAGAAAGAAAGAAAGAAAGAAAGAA
ENSMUSG00000017978	Cadps2	6	23262773	23839421	ENSMUST00000115356.2	1037	1062	+	1.45113	7.98e-06	0.0794	AAAGAAAGAAAGAAAGAAAGAAAGAA
ENSMUSG00000017978	Cadps2	6	23262773	23839421	ENSMUST00000115356.2	1053	1078	+	1.45113	7.98e-06	0.0794	AAAGAAAGAAAGAAAGAAAGAAAGAA
ENSMUSG00000017978	Cadps2	6	23262773	23839421	ENSMUST00000115356.2	1045	1070	+	1.45113	7.98e-06	0.0794	AAAGAAAGAAAGAAAGAAAGAAAGAA
ENSMUSG00000017978	Cadps2	6	23262773	23839421	ENSMUST00000115356.2	1065	1090	+	1.45113	7.98e-06	0.0794	AAAGAAAGAAAGAAAGAAAGAAAGAA
ENSMUSG00000017978	Cadps2	6	23262773	23839421	ENSMUST00000115356.2	1021	1046	+	1.45113	7.98e-06	0.0794	AAAGAAAGAAAGAAAGAAAGAAAGAA
ENSMUSG00000017978	Cadps2	6	23262773	23839421	ENSMUST00000115356.2	1057	1082	+	1.45113	7.98e-06	0.0794	AAAGAAAGAAAGAAAGAAAGAAAGAA
ENSMUSG00000017978	Cadps2	6	23262773	23839421	ENSMUST00000115356.2	1049	1074	+	1.45113	7.98e-06	0.0794	AAAGAAAGAAAGAAAGAAAGAAAGAA
ENSMUSG00000028222	Calb1	4	15881264	15908064	ENSMUST00000029876.1	2260	2285	+	-5.96241	6.51e-05	0.166	AAAAAAGAATAAAAAGAATATAAATC
ENSMUSG00000028222	Calb1	4	15881264	15908064	ENSMUST00000029876.1	2250	2275	+	-5.84211	6.33e-05	0.166	AGAACAGAAAAAAAAAGAATAAAAAG
ENSMUSG00000028222	Calb1	4	15881264	15908064	ENSMUST00000029876.1	2268	2293	+	3.09023	4.66e-06	0.0794	ATAAAAAGAATATAAATCTAGAAATG
ENSMUSG00000028222	Calb1	4	15881264	15908064	ENSMUST00000029876.1	2933	2958	+	-7.73684	9.71e-05	0.177	AACAAGTTCAGAACAACATTGTATTG
ENSMUSG00000028222	Calb1	4	15881264	15908064	ENSMUST00000029876.1	2505	2530	+	-3.81203	3.63e-05	0.141	AAAAAAAATTGTAATACAAGTAACTG
ENSMUSG00000060371	Caln1	5	130369455	130847412	ENSMUST00000111288.3	4080	4105	+	-7.67669	9.57e-05	0.177	AAAGAAGGAAGGAAGGAAGGAGGGAG
ENSMUSG00000060371	Caln1	5	130369455	130847412	ENSMUST00000111288.3	4076	4101	+	-2.75188	2.55e-05	0.114	AAAGAAAGAAGGAAGGAAGGAAGGAG
ENSMUSG00000060371	Caln1	5	130369455	130847412	ENSMUST00000111288.3	2760	2785	+	-5.95489	6.49e-05	0.166	ATCATGGAAGGAAAGACATGAAAGAA
ENSMUSG00000060371	Caln1	5	130369455	130847412	ENSMUST00000111288.3	4060	4085	+	-7.81955	9.92e-05	0.177	AAGGAAGGAAGGAAGGAAAGAAAGAA
ENSMUSG00000060371	Caln1	5	130369455	130847412	ENSMUST00000111288.3	769	794	+	-5.73684	6.19e-05	0.166	GAAAAAAGAAAAAAAAAAAAAAAGAA
ENSMUSG00000060371	Caln1	5	130369455	130847412	ENSMUST00000111288.3	4064	4089	+	-7.81955	9.92e-05	0.177	AAGGAAGGAAGGAAAGAAAGAAGGAA
ENSMUSG00000060371	Caln1	5	130369455	130847412	ENSMUST00000111288.3	4056	4081	+	-1.78195	1.88e-05	0.0952	AAAGAAGGAAGGAAGGAAGGAAAGAA
ENSMUSG00000060371	Caln1	5	130369455	130847412	ENSMUST00000111288.3	782	807	+	-7.28571	8.81e-05	0.177	AAAAAAAAAAGAAAAAATCCATAACC
ENSMUSG00000060371	Caln1	5	130369455	130847412	ENSMUST00000111288.3	784	809	+	1.2406	8.56e-06	0.0825	AAAAAAAAGAAAAAATCCATAACCTG
ENSMUSG00000060371	Caln1	5	130369455	130847412	ENSMUST00000111288.3	1111	1136	+	-7.53383	9.28e-05	0.177	AGCTAAGAAAAGGAGACCTAGAAGCT
ENSMUSG00000039145	Camk1d	2	5293457	5714515	ENSMUST00000044009.13	3367	3392	+	-4.33835	4.22e-05	0.15	AACAAAATAAAAAAGAGCAGGAAAAG
ENSMUSG00000039145	Camk1d	2	5293457	5714515	ENSMUST00000044009.13	5306	5331	+	-6.88722	8e-05	0.175	AGTAAAAGAAGGGAAACTGTGCATTT
ENSMUSG00000039145	Camk1d	2	5293457	5714515	ENSMUST00000044009.13	3358	3383	+	-3.59398	3.35e-05	0.134	AAAAAACAAAACAAAATAAAAAAGAG
ENSMUSG00000053819	Camk2d	3	126596302	126846326	ENSMUST00000199300.4	1583	1608	+	-5	5.12e-05	0.16	AGCAAAAAAAGCAAAAACTTAAACAC
ENSMUSG00000021820	Camk2g	14	20734875	20794088	ENSMUST00000100837.10	220	245	+	-0.075188	1.2e-05	0.0874	AAAAAAAAAAAGAAAATAAGATTGTT
ENSMUSG00000021820	Camk2g	14	20734875	20794088	ENSMUST00000100837.10	218	243	+	-1.6015	1.8e-05	0.0951	AAAAAAAAAAAAAGAAAATAAGATTG
ENSMUSG00000014592	Camta1	4	150917322	151861876	ENSMUST00000097774.8	1451	1476	+	-5.76692	6.23e-05	0.166	AAAAAAAAAAGGATATGTTTACATTT
ENSMUSG00000014592	Camta1	4	150917322	151861876	ENSMUST00000097774.8	1781	1806	+	-1.5188	1.76e-05	0.0951	CAAAATAAAAGGGAAACCCGGTGGAG
ENSMUSG00000014592	Camta1	4	150917322	151861876	ENSMUST00000097774.8	1080	1105	+	-1.11278	1.56e-05	0.0899	AAAAAAGCGAGAAAATATTTGAAAGG
ENSMUSG00000014592	Camta1	4	150917322	151861876	ENSMUST00000097774.8	1442	1467	+	-7.19549	8.64e-05	0.177	TTTAAAAAAAAAAAAAAAAGGATATG
ENSMUSG00000014592	Camta1	4	150917322	151861876	ENSMUST00000097774.8	1081	1106	+	-5.09774	5.25e-05	0.16	AAAAAGCGAGAAAATATTTGAAAGGG
ENSMUSG00000021373	Cap2	13	46501848	46650281	ENSMUST00000021802.15	1590	1615	+	-4.12782	3.99e-05	0.147	AAAAAATAAAAGTCAAAATGGAGCTG
ENSMUSG00000021373	Cap2	13	46501848	46650281	ENSMUST00000021802.15	333	358	+	0.789474	9.64e-06	0.0833	AAAAAAAAAAATGAAGCCTTAGAGAA
ENSMUSG00000056158	Car10	11	93098028	93601749	ENSMUST00000107863.3	1371	1396	+	-0.300752	1.27e-05	0.088	AAAAAAAAAAAAAATCAATAAATGTG
ENSMUSG00000056158	Car10	11	93098028	93601749	ENSMUST00000107863.3	1369	1394	+	1.47368	7.94e-06	0.0794	AAAAAAAAAAAAAAAATCAATAAATG
ENSMUSG00000056158	Car10	11	93098028	93601749	ENSMUST00000107863.3	1370	1395	+	-0.789474	1.44e-05	0.088	AAAAAAAAAAAAAAATCAATAAATGT
ENSMUSG00000041261	Car8	4	8143362	8239041	ENSMUST00000066674.7	1068	1093	+	0.496241	1.04e-05	0.0846	TACAAAAAAAAAAAAAATCACAAGAG
ENSMUSG00000041261	Car8	4	8143362	8239041	ENSMUST00000066674.7	1070	1095	+	-6.7218	7.71e-05	0.172	CAAAAAAAAAAAAAATCACAAGAGAT
ENSMUSG00000041261	Car8	4	8143362	8239041	ENSMUST00000066674.7	1321	1346	+	-4.72932	4.77e-05	0.158	AAACAAACAAAATGAACCCTGAAATT
ENSMUSG00000041261	Car8	4	8143362	8239041	ENSMUST00000066674.7	1322	1347	+	2.78195	5.25e-06	0.0794	AACAAACAAAATGAACCCTGAAATTG
ENSMUSG00000015944	Castor2	5	134099711	134144343	ENSMUST00000016088.8	3506	3531	+	0.338346	1.09e-05	0.0863	AAGAAAAGAAAAAAAGAAAGAAAACG
ENSMUSG00000015944	Castor2	5	134099711	134144343	ENSMUST00000016088.8	3469	3494	+	-6.45865	7.33e-05	0.172	AAAAAAAAAAAAAAAAAAAAGAAAGA
ENSMUSG00000015944	Castor2	5	134099711	134144343	ENSMUST00000016088.8	3514	3539	+	3.57143	3.94e-06	0.0794	AAAAAAAGAAAGAAAACGTCAAATAT
ENSMUSG00000015944	Castor2	5	134099711	134144343	ENSMUST00000016088.8	3468	3493	+	-7.42857	9.08e-05	0.177	AAAAAAAAAAAAAAAAAAAAAGAAAG
ENSMUSG00000015944	Castor2	5	134099711	134144343	ENSMUST00000016088.8	3475	3500	+	-7.42857	9.08e-05	0.177	AAAAAAAAAAAAAAGAAAGAAAAGAA
ENSMUSG00000015944	Castor2	5	134099711	134144343	ENSMUST00000016088.8	3515	3540	+	-5.1203	5.28e-05	0.16	AAAAAAGAAAGAAAACGTCAAATATC
ENSMUSG00000015944	Castor2	5	134099711	134144343	ENSMUST00000016088.8	3502	3527	+	2.30075	6.11e-06	0.0794	AGAAAAGAAAAGAAAAAAAGAAAGAA
ENSMUSG00000015944	Castor2	5	134099711	134144343	ENSMUST00000016088.8	3464	3489	+	-0.81203	1.45e-05	0.088	AAAAAAAAAAAAAAAAAAAAAAAAAG
ENSMUSG00000015944	Castor2	5	134099711	134144343	ENSMUST00000016088.8	3478	3503	+	2.30075	6.11e-06	0.0794	AAAAAAAAAAAGAAAGAAAAGAAAAG
ENSMUSG00000015944	Castor2	5	134099711	134144343	ENSMUST00000016088.8	3483	3508	+	3.99248	3.33e-06	0.0794	AAAAAAGAAAGAAAAGAAAAGAAAAG
ENSMUSG00000015944	Castor2	5	134099711	134144343	ENSMUST00000016088.8	3473	3498	+	0.879699	9.44e-06	0.0833	AAAAAAAAAAAAAAAAGAAAGAAAAG
ENSMUSG00000015944	Castor2	5	134099711	134144343	ENSMUST00000016088.8	3474	3499	+	-2.65414	2.46e-05	0.111	AAAAAAAAAAAAAAAGAAAGAAAAGA
ENSMUSG00000015944	Castor2	5	134099711	134144343	ENSMUST00000016088.8	5898	5923	+	-7.08271	8.41e-05	0.177	TGTCAAAGAAACAAAACCCTTAAGAG
ENSMUSG00000015944	Castor2	5	134099711	134144343	ENSMUST00000016088.8	3479	3504	+	-7.30827	8.86e-05	0.177	AAAAAAAAAAGAAAGAAAAGAAAAGA
ENSMUSG00000015944	Castor2	5	134099711	134144343	ENSMUST00000016088.8	3466	3491	+	-0.81203	1.45e-05	0.088	AAAAAAAAAAAAAAAAAAAAAAAGAA
ENSMUSG00000015944	Castor2	5	134099711	134144343	ENSMUST00000016088.8	3470	3495	+	4.95489	2.38e-06	0.0776	AAAAAAAAAAAAAAAAAAAGAAAGAA
ENSMUSG00000015944	Castor2	5	134099711	134144343	ENSMUST00000016088.8	5947	5972	+	-7.58647	9.36e-05	0.177	AAAAAAAAAAAAAAAGTACCTAACGT
ENSMUSG00000015944	Castor2	5	134099711	134144343	ENSMUST00000016088.8	5948	5973	+	-0.909774	1.48e-05	0.0881	AAAAAAAAAAAAAAGTACCTAACGTT
ENSMUSG00000037060	Cavin3	7	105480083	105482300	ENSMUST00000047040.3	712	737	+	-7.04511	8.33e-05	0.177	ATAAAATAAAAAAAAAATAGGACCTC
ENSMUSG00000040380	Cbln3	14	55878913	55884392	ENSMUST00000063871.12	3752	3777	+	-7.64662	9.52e-05	0.177	GACAGAAGCAGGAAGATCTGGAGTTG
ENSMUSG00000040380	Cbln3	14	55878913	55884392	ENSMUST00000063871.12	1556	1581	+	-6.34586	7.15e-05	0.172	CAAAGAAAGAAATAAGGATGGAGGTG
ENSMUSG00000031641	Cbr4	8	61487734	61506694	ENSMUST00000034058.13	2814	2839	+	-0.195489	1.23e-05	0.0874	AGAACAGAAATGAAGACACAGAACTG
ENSMUSG00000039983	Ccdc32	2	119017779	119029393	ENSMUST00000036470.13	600	625	+	-1.11278	1.56e-05	0.0899	AAAAAAAGTGTGAAAACGTGGGTGTT
ENSMUSG00000039983	Ccdc32	2	119017779	119029393	ENSMUST00000036470.13	591	616	+	-4.97744	5.09e-05	0.16	AGAAAAAGAAAAAAAAGTGTGAAAAC
ENSMUSG00000039983	Ccdc32	2	119017779	119029393	ENSMUST00000036470.13	592	617	+	0.631579	1e-05	0.0842	GAAAAAGAAAAAAAAGTGTGAAAACG
ENSMUSG00000032878	Ccdc85a	11	28385685	28584324	ENSMUST00000093253.9	45	70	+	-5.14286	5.3e-05	0.16	AGAAAAAGAAGACAAAGAAGAAATTC
ENSMUSG00000032878	Ccdc85a	11	28385685	28584324	ENSMUST00000093253.9	828	853	+	-3.96241	3.81e-05	0.146	ATAAACTTTATGTAAACTTTAAAGTC
ENSMUSG00000019997	Ccn2	10	24595442	24598683	ENSMUST00000176228.1	1282	1307	+	-4.50376	4.46e-05	0.154	TTCAAAACAAAGGAGATACTGCAGTG
ENSMUSG00000000184	Ccnd2	6	127125162	127152193	ENSMUST00000000188.11	4577	4602	+	-6.7218	7.71e-05	0.172	ACAAAAAAAAAAAAAACAAAAAAAAA
ENSMUSG00000000184	Ccnd2	6	127125162	127152193	ENSMUST00000000188.11	4587	4612	+	1.71429	7.44e-06	0.0794	AAAAAACAAAAAAAAAAACAGAAAAG
ENSMUSG00000000184	Ccnd2	6	127125162	127152193	ENSMUST00000000188.11	5041	5066	+	-0.0601504	1.2e-05	0.0874	ACAAAAAAAAAATCAACCCTAATTTG
ENSMUSG00000000184	Ccnd2	6	127125162	127152193	ENSMUST00000000188.11	4605	4630	+	9.00752	6.82e-07	0.0692	CAGAAAAGAAAAAAAACGTTAAAATG
ENSMUSG00000000184	Ccnd2	6	127125162	127152193	ENSMUST00000000188.11	2051	2076	+	1.33083	8.29e-06	0.0802	AACAAAACAAAACAAAACCAATAGTG
ENSMUSG00000000184	Ccnd2	6	127125162	127152193	ENSMUST00000000188.11	4589	4614	+	0.037594	1.17e-05	0.0874	AAAACAAAAAAAAAAACAGAAAAGAA
ENSMUSG00000000184	Ccnd2	6	127125162	127152193	ENSMUST00000000188.11	101	126	+	-6.45865	7.33e-05	0.172	AAAAAAGAAAAAAAAAAAACAAAAAA
ENSMUSG00000000184	Ccnd2	6	127125162	127152193	ENSMUST00000000188.11	4597	4622	+	-5.42857	5.73e-05	0.165	AAAAAAAACAGAAAAGAAAAAAAACG
ENSMUSG00000000184	Ccnd2	6	127125162	127152193	ENSMUST00000000188.11	104	129	+	-7.30075	8.84e-05	0.177	AAAGAAAAAAAAAAAACAAAAAACAA
ENSMUSG00000000184	Ccnd2	6	127125162	127152193	ENSMUST00000000188.11	4576	4601	+	-7.45865	9.13e-05	0.177	AACAAAAAAAAAAAAAACAAAAAAAA
ENSMUSG00000000184	Ccnd2	6	127125162	127152193	ENSMUST00000000188.11	4582	4607	+	-5.87218	6.37e-05	0.166	AAAAAAAAAAACAAAAAAAAAAACAG
ENSMUSG00000000184	Ccnd2	6	127125162	127152193	ENSMUST00000000188.11	109	134	+	-7.31579	8.88e-05	0.177	AAAAAAAAAAACAAAAAACAAAAACA
ENSMUSG00000036533	Cdc42ep3	17	79333727	79355091	ENSMUST00000068958.8	261	286	+	-4.43609	4.36e-05	0.152	AGAAAAAAAAAGAAAAGAAAAAGGAG
ENSMUSG00000036533	Cdc42ep3	17	79333727	79355091	ENSMUST00000068958.8	228	253	+	-6.41353	7.24e-05	0.172	AAAACAAAACAAAAAAACCTGTTCTG
ENSMUSG00000036533	Cdc42ep3	17	79333727	79355091	ENSMUST00000068958.8	267	292	+	10.5113	3.73e-07	0.0692	AAAAAGAAAAGAAAAAGGAGGAAGTG
ENSMUSG00000048895	Cdk5r1	11	80477023	80481184	ENSMUST00000053413.11	2097	2122	+	0.383459	1.07e-05	0.086	AAGAAAAAAAAAAAAAGAAAAATGTG
ENSMUSG00000048895	Cdk5r1	11	80477023	80481184	ENSMUST00000053413.11	2102	2127	+	1.06015	9.01e-06	0.0833	AAAAAAAAAAAGAAAAATGTGAAAAA
ENSMUSG00000048895	Cdk5r1	11	80477023	80481184	ENSMUST00000053413.11	2103	2128	+	0.180451	1.13e-05	0.0874	AAAAAAAAAAGAAAAATGTGAAAAAA
ENSMUSG00000048895	Cdk5r1	11	80477023	80481184	ENSMUST00000053413.11	2095	2120	+	-0.917293	1.48e-05	0.0881	AAAAGAAAAAAAAAAAAAGAAAAATG
ENSMUSG00000029403	Cdkl2	5	92006074	92043883	ENSMUST00000086978.11	407	432	+	-2.39098	2.29e-05	0.107	TGAAAATGAAAAAAAGCTAGGATCTG
ENSMUSG00000029330	Cds1	5	101765130	101823858	ENSMUST00000031273.8	1455	1480	+	-4.62406	4.63e-05	0.156	AAGAAATGGAGGGAAGCCTTGTGGTA
ENSMUSG00000002107	Celf2	2	6539694	7509563	ENSMUST00000170438.7	2321	2346	+	-6.56391	7.49e-05	0.172	GAAAAAAAAAGAAAAAAAAAAAACTA
ENSMUSG00000002107	Celf2	2	6539694	7509563	ENSMUST00000170438.7	2315	2340	+	-6.45865	7.33e-05	0.172	AAAAAAGAAAAAAAAAGAAAAAAAAA
ENSMUSG00000002107	Celf2	2	6539694	7509563	ENSMUST00000170438.7	2600	2625	+	-1.29323	1.65e-05	0.0923	AAAAAAAAAAAAAAGGTTACAAAGTT
ENSMUSG00000002107	Celf2	2	6539694	7509563	ENSMUST00000170438.7	2459	2484	+	-1.36842	1.68e-05	0.0932	AAGAAAAAAGTGAAAACTATCTAGTG
ENSMUSG00000002107	Celf2	2	6539694	7509563	ENSMUST00000170438.7	2598	2623	+	-6.66165	7.63e-05	0.172	ACAAAAAAAAAAAAAAGGTTACAAAG
ENSMUSG00000002107	Celf2	2	6539694	7509563	ENSMUST00000170438.7	3657	3682	+	5.69925	1.89e-06	0.0692	AAAAAAAAAAAAAAAAAAAAAAAGTT
ENSMUSG00000002107	Celf2	2	6539694	7509563	ENSMUST00000170438.7	4417	4442	+	-5.92481	6.44e-05	0.166	TTAAAAGAAAATAAAACTTAAAAAAA
ENSMUSG00000002107	Celf2	2	6539694	7509563	ENSMUST00000170438.7	4416	4441	+	-7.49624	9.21e-05	0.177	ATTAAAAGAAAATAAAACTTAAAAAA
ENSMUSG00000002107	Celf2	2	6539694	7509563	ENSMUST00000170438.7	2799	2824	+	-4.6391	4.66e-05	0.156	CTCTAAGGTGAGAAAGTCCTGAACTT
ENSMUSG00000002107	Celf2	2	6539694	7509563	ENSMUST00000170438.7	343	368	+	4.3985	2.91e-06	0.0794	GTGAAAGGCAAGCAAACACTAATGTG
ENSMUSG00000028137	Celf3	3	94478295	94492198	ENSMUST00000200342.4	1046	1071	+	-0.759398	1.43e-05	0.088	AAATAAAGAAAAAACATTTGAAAGCA
ENSMUSG00000024268	Celf4	18	25477632	25754157	ENSMUST00000115816.2	1078	1103	+	7.81203	1.04e-06	0.0692	AAAAAGGAAAAAAAAACCTTATAGAA
ENSMUSG00000024268	Celf4	18	25477632	25754157	ENSMUST00000115816.2	1077	1102	+	-3.78195	3.59e-05	0.14	AAAAAAGGAAAAAAAAACCTTATAGA
ENSMUSG00000024268	Celf4	18	25477632	25754157	ENSMUST00000115816.2	1065	1090	+	-7.44361	9.1e-05	0.177	AAAAAATAAAAAAAAAAAGGAAAAAA
ENSMUSG00000024268	Celf4	18	25477632	25754157	ENSMUST00000115816.2	1991	2016	+	-6.46617	7.35e-05	0.172	AAACAAAAACAAAAAACCCAACAGCT
ENSMUSG00000024268	Celf4	18	25477632	25754157	ENSMUST00000115816.2	1595	1620	+	-0.977444	1.5e-05	0.0888	GAAAAAACAAGGAAAACTATTTAATG
ENSMUSG00000024268	Celf4	18	25477632	25754157	ENSMUST00000115816.2	672	697	+	-4.90226	5e-05	0.16	AAAAGAACAAAAAAAACAAGGAAAAA
ENSMUSG00000024268	Celf4	18	25477632	25754157	ENSMUST00000115816.2	661	686	+	-7.58647	9.36e-05	0.177	AAAAAAATAAAAAAAGAACAAAAAAA
ENSMUSG00000024268	Celf4	18	25477632	25754157	ENSMUST00000115816.2	1681	1706	+	-4.5188	4.49e-05	0.155	CTCAGAATCAGAAAAACACTGAATTA
ENSMUSG00000024268	Celf4	18	25477632	25754157	ENSMUST00000115816.2	1064	1089	+	-5.75188	6.22e-05	0.166	AAAAAAATAAAAAAAAAAAGGAAAAA
ENSMUSG00000034818	Celf5	10	81459227	81482709	ENSMUST00000118763.7	3042	3067	+	1.6391	7.6e-06	0.0794	AAACGAAAAACAAAAACCTAAAAGTT
ENSMUSG00000034818	Celf5	10	81459227	81482709	ENSMUST00000118763.7	334	359	+	-7.7594	9.79e-05	0.177	AAACCGGGAGAGAAAGCTAGGAGGTT
ENSMUSG00000032297	Celf6	9	59577917	59607292	ENSMUST00000129357.7	622	647	+	-3.49624	3.24e-05	0.133	AACAACAAAGAGAAGGCCCCGAAGGC
ENSMUSG00000032297	Celf6	9	59577917	59607292	ENSMUST00000129357.7	953	978	+	2.90226	5.01e-06	0.0794	AAAGGAAACAGAAAAGCACAGAAATG
ENSMUSG00000032297	Celf6	9	59577917	59607292	ENSMUST00000129357.7	1278	1303	+	0.0150376	1.18e-05	0.0874	AACAAAGAAAAAAAAACAGGAGACAA
ENSMUSG00000027221	Chst1	2	92599707	92615250	ENSMUST00000065797.6	731	756	+	-2.25564	2.2e-05	0.105	AAAAAAAAAAAAAAAAGACAAAAAAA
ENSMUSG00000027221	Chst1	2	92599707	92615250	ENSMUST00000065797.6	736	761	+	1.49624	7.91e-06	0.0794	AAAAAAAAAAAGACAAAAAAAATGTG
ENSMUSG00000027221	Chst1	2	92599707	92615250	ENSMUST00000065797.6	733	758	+	-7.30075	8.84e-05	0.177	AAAAAAAAAAAAAAGACAAAAAAAAT
ENSMUSG00000027221	Chst1	2	92599707	92615250	ENSMUST00000065797.6	734	759	+	-6.95489	8.14e-05	0.175	AAAAAAAAAAAAAGACAAAAAAAATG
ENSMUSG00000027221	Chst1	2	92599707	92615250	ENSMUST00000065797.6	732	757	+	-7.58647	9.36e-05	0.177	AAAAAAAAAAAAAAAGACAAAAAAAA
ENSMUSG00000037493	Cib2	9	54544794	54560218	ENSMUST00000041901.6	405	430	+	-1.78195	1.88e-05	0.0952	AACCAAGCAAAGAAAACAGAAAACAG
ENSMUSG00000029516	Cit	5	115845278	116008947	ENSMUST00000123736.1	96	121	+	-6.28571	7.02e-05	0.171	ATAAATAAGAAGAACTCTTTAAAGCA
ENSMUSG00000029516	Cit	5	115845278	116008947	ENSMUST00000123736.1	810	835	+	-7.64662	9.52e-05	0.177	AAGACAGAAAGGAGCGACCTGGAGTA
ENSMUSG00000039910	Cited2	10	17723218	17725674	ENSMUST00000038107.8	76	101	+	-7.42105	9.06e-05	0.177	AAAAAAAAAACAAAAAAACAAACATT
ENSMUSG00000000308	Ckmt1	2	121357714	121363737	ENSMUST00000128612.1	15	40	+	-3.69925	3.49e-05	0.138	AAAAGACCCTGGAAATCCCTGAAGAG
ENSMUSG00000007041	Clic1	17	35049966	35058749	ENSMUST00000007257.9	218	243	+	-6.90226	8.03e-05	0.175	AATACAGAATGGAAAAAAATCTAGTG
ENSMUSG00000049550	Clip1	5	123577795	123684618	ENSMUST00000144121.1	1440	1465	+	-6.2406	6.96e-05	0.171	AAGAGAAGGAGGACAGCCTGGAGGCC
ENSMUSG00000049550	Clip1	5	123577795	123684618	ENSMUST00000144121.1	1974	1999	+	4.42105	2.89e-06	0.0794	ACCAAAAGGAGGAACAGTTTAACGTG
ENSMUSG00000024059	Clip4	17	71768473	71864273	ENSMUST00000230160.1	512	537	+	-1.66165	1.82e-05	0.0951	AAAAAAAAAAAAAAAAAAAGAACACG
ENSMUSG00000024059	Clip4	17	71768473	71864273	ENSMUST00000230160.1	460	485	+	-7.53383	9.28e-05	0.177	TAAAAAAAAAAAACAAAAAAAAAGTT
ENSMUSG00000024059	Clip4	17	71768473	71864273	ENSMUST00000230160.1	520	545	+	-4.73684	4.78e-05	0.158	AAAAAAAAAAAGAACACGCTACTTAG
ENSMUSG00000024059	Clip4	17	71768473	71864273	ENSMUST00000230160.1	518	543	+	-0.804511	1.44e-05	0.088	AAAAAAAAAAAAAGAACACGCTACTT
ENSMUSG00000024059	Clip4	17	71768473	71864273	ENSMUST00000230160.1	465	490	+	-6.08271	6.7e-05	0.168	AAAAAAAACAAAAAAAAAGTTAGGTC
ENSMUSG00000024059	Clip4	17	71768473	71864273	ENSMUST00000230160.1	511	536	+	-6.45865	7.33e-05	0.172	AAAAAAAAAAAAAAAAAAAAGAACAC
ENSMUSG00000024059	Clip4	17	71768473	71864273	ENSMUST00000230160.1	1147	1172	+	-6.66917	7.65e-05	0.172	ATATAAAGAAAAAAAAAACTTTAAAG
ENSMUSG00000024059	Clip4	17	71768473	71864273	ENSMUST00000230160.1	1149	1174	+	10.7143	3.39e-07	0.0692	ATAAAGAAAAAAAAAACTTTAAAGAA
ENSMUSG00000041216	Clvs1	4	9269293	9451691	ENSMUST00000038841.13	292	317	+	2.6015	5.57e-06	0.0794	CAAAAGGGGAAAAAAACCCTAAATTA
ENSMUSG00000019785	Clvs2	10	33512286	33624769	ENSMUST00000161692.1	1752	1777	+	-7.77444	9.83e-05	0.177	AAAATACGTTGGACAGCACAGAACTA
ENSMUSG00000019785	Clvs2	10	33512286	33624769	ENSMUST00000161692.1	2910	2935	+	-0.503759	1.34e-05	0.088	AACCAAATTATAAAAATTTTAAAATG
ENSMUSG00000030282	Cmas	6	142756686	142775714	ENSMUST00000144920.3	2655	2680	+	-4.42105	4.34e-05	0.152	AAAATGAAAAAGACAGTTCAGAAGGG
ENSMUSG00000020638	Cmpk2	12	26469204	26479837	ENSMUST00000020969.4	1221	1246	+	-4.99248	5.11e-05	0.16	AAAACAAACAAGTAAACAATAAAAGG
ENSMUSG00000026514	Cnih3	1	181352628	181460641	ENSMUST00000027795.13	1347	1372	+	-7.66917	9.56e-05	0.177	AAAAAATTACAGAAAACAAAATAGAG
ENSMUSG00000026514	Cnih3	1	181352628	181460641	ENSMUST00000027795.13	768	793	+	-4.90977	5.01e-05	0.16	AAAAAACAAAACAAAACACCAAACCA
ENSMUSG00000025189	Cnnm1	19	43440436	43497210	ENSMUST00000165311.2	713	738	+	-5.81203	6.29e-05	0.166	AAAAAAAAAAAAACAACTTACATGAA
ENSMUSG00000025189	Cnnm1	19	43440436	43497210	ENSMUST00000165311.2	711	736	+	-0.18797	1.23e-05	0.0874	AAAAAAAAAAAAAAACAACTTACATG
ENSMUSG00000078653	Cntd1	11	101279012	101296317	ENSMUST00000103107.4	184	209	+	-3.78947	3.6e-05	0.141	AAAAAAAACATCAAAGAATTGGACTG
ENSMUSG00000039419	Cntnap2	6	45059357	47304213	ENSMUST00000114641.7	4405	4430	+	-6.56391	7.49e-05	0.172	AGAAAAAAAAAAAAAAAATAGAATAA
ENSMUSG00000039419	Cntnap2	6	45059357	47304213	ENSMUST00000114641.7	5071	5096	+	-4.93985	5.05e-05	0.16	GACAAAGGTAATAAAGATAGAAATGG
ENSMUSG00000039419	Cntnap2	6	45059357	47304213	ENSMUST00000114641.7	5020	5045	+	-6.72932	7.72e-05	0.172	ATCACTGTCAATAAAACAGAGAAGTG
ENSMUSG00000039419	Cntnap2	6	45059357	47304213	ENSMUST00000114641.7	2762	2787	+	-0.571429	1.37e-05	0.088	AAAAAAAAAAAAAAAACCCAAGACAC
ENSMUSG00000039419	Cntnap2	6	45059357	47304213	ENSMUST00000114641.7	3712	3737	+	-7.09023	8.41e-05	0.177	CTTAAAAGAAAAAAAAAAGGAAAGAA
ENSMUSG00000039419	Cntnap2	6	45059357	47304213	ENSMUST00000114641.7	2760	2785	+	0.0225564	1.17e-05	0.0874	AAAAAAAAAAAAAAAAAACCCAAGAC
ENSMUSG00000039419	Cntnap2	6	45059357	47304213	ENSMUST00000114641.7	2764	2789	+	-0.338346	1.28e-05	0.088	AAAAAAAAAAAAAACCCAAGACACTG
ENSMUSG00000039419	Cntnap2	6	45059357	47304213	ENSMUST00000114641.7	922	947	+	2.7594	5.28e-06	0.0794	AACAAAAATATGGATACTTTCTAGTG
ENSMUSG00000018661	Cog1	11	113649169	113667054	ENSMUST00000018805.14	308	333	+	2.12782	6.51e-06	0.0794	CTAGAAGAAAATAAGATATGGAAGTG
ENSMUSG00000026500	Cox20	1	178319130	178322693	ENSMUST00000027781.6	43	68	+	0.87218	9.45e-06	0.0833	ACCATAGATTAAAAAACTCAAACGTG
ENSMUSG00000049387	Cox7b2	5	71442824	71548205	ENSMUST00000050129.5	55	80	+	-5.07519	5.21e-05	0.16	AAACCAAACAAACAAAACTTGTAGTG
ENSMUSG00000025867	Cplx2	13	54371349	54383917	ENSMUST00000026985.8	3037	3062	+	-7.66165	9.55e-05	0.177	GAAAACAACAGGCAACCCTGGAAGGA
ENSMUSG00000039714	Cplx3	9	57599992	57606281	ENSMUST00000045068.9	1188	1213	+	1.39098	8.16e-06	0.0802	AAACAGAGAAAAAAAGCATCATTGTG
ENSMUSG00000032564	Cpne4	9	104547286	105034544	ENSMUST00000057742.14	458	483	+	-6.16541	6.82e-05	0.169	ATTATAATAAAAATAACCTTACACTG
ENSMUSG00000032564	Cpne4	9	104547286	105034544	ENSMUST00000057742.14	65	90	+	-5.95489	6.49e-05	0.166	ACAAAACAAAAAAAAACAATAATATA
ENSMUSG00000032564	Cpne4	9	104547286	105034544	ENSMUST00000057742.14	1606	1631	+	-6.26316	6.99e-05	0.171	AAAAACAGTCACAAATGTTTAAATTG
ENSMUSG00000063889	Crem	18	3266048	3337748	ENSMUST00000025069.10	795	820	+	-0.729323	1.42e-05	0.088	ACCTCAGGAAAGAATGAAAGGAAGTG
ENSMUSG00000021680	Crhbp	13	95431371	95444924	ENSMUST00000221025.1	358	383	+	-4.96992	5.08e-05	0.16	AAATAAAAAAAGAAGAAGTCAAAGTC
ENSMUSG00000029121	Crmp1	5	37241940	37292133	ENSMUST00000114158.8	892	917	+	-6.76692	7.79e-05	0.173	TGAAAAAAAATAAAGAAATTAAATTG
ENSMUSG00000046707	Csnk2a2	8	95446096	95490039	ENSMUST00000212214.1	2632	2657	+	-7.18797	8.63e-05	0.177	AAAAAAAAAAAAAAGACCCCACAAAA
ENSMUSG00000046707	Csnk2a2	8	95446096	95490039	ENSMUST00000212214.1	445	470	+	-3.31579	3.08e-05	0.13	TACAAAAAAAAAAAAGGATTAAAACA
ENSMUSG00000046707	Csnk2a2	8	95446096	95490039	ENSMUST00000212214.1	3689	3714	+	-7.08271	8.41e-05	0.177	TAAAAGAAAAAACAAACTTTGAATCA
ENSMUSG00000022240	Ctnnd2	15	30172593	31029341	ENSMUST00000081728.6	713	738	+	3.36842	4.22e-06	0.0794	AAAAAAAAAAGGAATATTTAGCAGTA
ENSMUSG00000022240	Ctnnd2	15	30172593	31029341	ENSMUST00000081728.6	699	724	+	-3.46617	3.21e-05	0.133	AAAAAAAACAGGAAAAAAAAAAAAGG
ENSMUSG00000039206	Daglb	5	143464584	143505942	ENSMUST00000045593.11	1017	1042	+	-6.73684	7.74e-05	0.172	AAAATAAAAAAAAAATCCAGAAAACA
ENSMUSG00000039206	Daglb	5	143464584	143505942	ENSMUST00000045593.11	1036	1061	+	-6.34586	7.15e-05	0.172	GAAAACAACAAAAAAGTATGGTGGTG
ENSMUSG00000039206	Daglb	5	143464584	143505942	ENSMUST00000045593.11	1016	1041	+	-6.34586	7.15e-05	0.172	AAAAATAAAAAAAAAATCCAGAAAAC
ENSMUSG00000053226	Dand5	8	84815404	84832409	ENSMUST00000065539.5	267	292	+	-3.78195	3.59e-05	0.14	AAAAAAGGTGAAAATTAGCTATAGTG
ENSMUSG00000021559	Dapk1	13	60601947	60763191	ENSMUST00000077453.12	364	389	+	-0.240602	1.24e-05	0.0874	AAAAAAAAAGAAAAAGAAAGGAAGAA
ENSMUSG00000021559	Dapk1	13	60601947	60763191	ENSMUST00000077453.12	354	379	+	6.64662	1.45e-06	0.0692	AAAAAAGAAAAAAAAAAAAGAAAAAG
ENSMUSG00000021559	Dapk1	13	60601947	60763191	ENSMUST00000077453.12	368	393	+	-7.57895	9.35e-05	0.177	AAAAAGAAAAAGAAAGGAAGAAATAA
ENSMUSG00000045608	Dbx2	15	95623563	95655960	ENSMUST00000054244.6	370	395	+	-6.84962	7.93e-05	0.174	AAGTAAAAAAAAAAAAAACCAACGAG
ENSMUSG00000035910	Dcdc2a	13	25056004	25210706	ENSMUST00000069614.6	4427	4452	+	-2.83459	2.64e-05	0.116	GTAAAAAGAGTCAACACCTGAAAGAG
ENSMUSG00000046818	Ddit4l	3	137621612	137628333	ENSMUST00000053855.7	872	897	+	-5.69925	6.14e-05	0.166	AAAAAAAAAAAGAAATGACTGTCTTT
ENSMUSG00000038055	Dexi	16	10502531	10543054	ENSMUST00000184863.7	1703	1728	+	-6.21805	6.93e-05	0.17	AGCAGAAAAAAATGGAAATGGAAGTG
ENSMUSG00000038055	Dexi	16	10502531	10543054	ENSMUST00000184863.7	1697	1722	+	-2.83459	2.64e-05	0.116	AAGAGGAGCAGAAAAAAATGGAAATG
ENSMUSG00000007682	Dio2	12	90724552	90738438	ENSMUST00000082432.4	4286	4311	+	-0.924812	1.48e-05	0.0881	AAAAATGAAAGAGAGCCACAGAAGGG
ENSMUSG00000007682	Dio2	12	90724552	90738438	ENSMUST00000082432.4	2245	2270	+	-0.661654	1.4e-05	0.088	AACACTGGAAGAAAAACCCTTGAAGG
ENSMUSG00000047842	Diras2	13	52504380	52531279	ENSMUST00000057442.7	864	889	+	-3.2406	3.01e-05	0.127	ATAAAAGGAAATAAAGTAGGCATGTT
ENSMUSG00000031523	Dlc1	8	36567751	36953143	ENSMUST00000033923.13	1858	1883	+	-6.56391	7.49e-05	0.172	ACAAAAGAAAAAAAAAGAATAAATAA
ENSMUSG00000031523	Dlc1	8	36567751	36953143	ENSMUST00000033923.13	1866	1891	+	-3.15038	2.93e-05	0.125	AAAAAAAAGAATAAATAAAGGAAGAG
ENSMUSG00000003279	Dlgap1	17	69969073	70821413	ENSMUST00000133983.7	1518	1543	+	-6.93233	8.1e-05	0.175	AAAGAAAAAAAAAATGCTTGTATCAG
ENSMUSG00000003279	Dlgap1	17	69969073	70821413	ENSMUST00000133983.7	1498	1523	+	0.93985	9.3e-06	0.0833	AAAAAAAAACGAAAGACTTAAAAGAA
ENSMUSG00000003279	Dlgap1	17	69969073	70821413	ENSMUST00000133983.7	2354	2379	+	-4.92481	5.03e-05	0.16	AAAAAAAATAAAAAAGCGAATTATTG
ENSMUSG00000003279	Dlgap1	17	69969073	70821413	ENSMUST00000133983.7	1491	1516	+	-5.84962	6.34e-05	0.166	AAAAAAAAAAAAAAAACGAAAGACTT
ENSMUSG00000003279	Dlgap1	17	69969073	70821413	ENSMUST00000133983.7	1556	1581	+	-6.6015	7.54e-05	0.172	AAAAAAAAAAAGAAACAACCAAACAA
ENSMUSG00000003279	Dlgap1	17	69969073	70821413	ENSMUST00000133983.7	1496	1521	+	-5.7218	6.18e-05	0.166	AAAAAAAAAAACGAAAGACTTAAAAG
ENSMUSG00000003279	Dlgap1	17	69969073	70821413	ENSMUST00000133983.7	1497	1522	+	0.909774	9.37e-06	0.0833	AAAAAAAAAACGAAAGACTTAAAAGA
ENSMUSG00000003279	Dlgap1	17	69969073	70821413	ENSMUST00000133983.7	1489	1514	+	-1.80451	1.89e-05	0.0953	GGAAAAAAAAAAAAAAAACGAAAGAC
ENSMUSG00000041911	Dlx1	2	71528113	71533981	ENSMUST00000037119.3	148	173	+	1.65414	7.56e-06	0.0794	ATAAAAGAAAAAGGAACAGTGAAGGC
ENSMUSG00000041911	Dlx1	2	71528113	71533981	ENSMUST00000037119.3	868	893	+	-6.09023	6.71e-05	0.168	ATAACAACAAAAGAAAGACCGAAGTA
ENSMUSG00000022099	Dmtn	14	70601263	70636048	ENSMUST00000022694.16	3304	3329	+	-2.81955	2.62e-05	0.116	CACTAAGGAAAGGAAGATTGGGAGTC
ENSMUSG00000032560	Dnajc13	9	104151282	104262930	ENSMUST00000035170.12	542	567	+	-3.54135	3.3e-05	0.134	AAAAATTAAAACTAAAAATGGATGTG
ENSMUSG00000022013	Dnajc15	14	77820681	77875125	ENSMUST00000226459.1	4842	4867	+	-1.69925	1.84e-05	0.0952	AACTCATGAAAGAAAACATTTCACTG
ENSMUSG00000027679	Dnajc19	3	34056020	34081321	ENSMUST00000011029.11	869	894	+	-4.89474	4.99e-05	0.16	AAAAAAAGAAGAAAGAGAAGAAGAAG
ENSMUSG00000027679	Dnajc19	3	34056020	34081321	ENSMUST00000011029.11	856	881	+	0.879699	9.44e-06	0.0833	AAAAAAAAAAAAAAAAAAAAGAAGAA
ENSMUSG00000027679	Dnajc19	3	34056020	34081321	ENSMUST00000011029.11	853	878	+	-6.84962	7.93e-05	0.174	ACAAAAAAAAAAAAAAAAAAAAAGAA
ENSMUSG00000027679	Dnajc19	3	34056020	34081321	ENSMUST00000011029.11	865	890	+	-4.04511	3.89e-05	0.146	AAAAAAAAAAAGAAGAAAGAGAAGAA
ENSMUSG00000027679	Dnajc19	3	34056020	34081321	ENSMUST00000011029.11	860	885	+	12.2932	1.85e-07	0.0658	AAAAAAAAAAAAAAAAGAAGAAAGAG
ENSMUSG00000027679	Dnajc19	3	34056020	34081321	ENSMUST00000011029.11	858	883	+	-7.42857	9.08e-05	0.177	AAAAAAAAAAAAAAAAAAGAAGAAAG
ENSMUSG00000029014	Dnajc2	5	21757267	21785251	ENSMUST00000115193.7	356	381	+	-3.79699	3.61e-05	0.141	AAATAATGCAGGCAATCCTGGTTGTG
ENSMUSG00000020657	Dnajc27	12	4082583	4110606	ENSMUST00000020986.14	342	367	+	-7.80451	9.89e-05	0.177	GAGAAAGGAATAACAACAGGAGAGAG
ENSMUSG00000042523	Dnal1	12	84114366	84147498	ENSMUST00000123491.7	2384	2409	+	-6.72932	7.72e-05	0.172	AAACAAAACCAAAAAAAACGGAAGGA
ENSMUSG00000042523	Dnal1	12	84114366	84147498	ENSMUST00000123491.7	2397	2422	+	-1.78195	1.88e-05	0.0952	AAAAACGGAAGGAAGGAAGGAAAGAA
ENSMUSG00000042523	Dnal1	12	84114366	84147498	ENSMUST00000123491.7	2472	2497	+	-7.09774	8.42e-05	0.177	AAGGAAGGAAGGAAGGAAGGAAGGAG
ENSMUSG00000042523	Dnal1	12	84114366	84147498	ENSMUST00000123491.7	2536	2561	+	-1.20301	1.6e-05	0.0905	AAGAAAGGAAGGAAGGAAGGAAATGG
ENSMUSG00000042523	Dnal1	12	84114366	84147498	ENSMUST00000123491.7	2405	2430	+	-0.481203	1.33e-05	0.088	AAGGAAGGAAGGAAAGAAGGAAGGAG
ENSMUSG00000022789	Dnm1l	16	16312230	16358959	ENSMUST00000023477.14	1599	1624	+	2.15789	6.42e-06	0.0794	TACAAAGGAAAACAAGCAAGAAACAG
ENSMUSG00000020848	Doc2b	11	75768966	75796049	ENSMUST00000021209.7	666	691	+	-5.2782	5.5e-05	0.163	TACAGAAAAGAGGAGGCCTGAAAGAG
ENSMUSG00000036815	Dpp10	1	123321471	124846039	ENSMUST00000112606.7	12097	12122	+	-5.71429	6.16e-05	0.166	ATTAAACAAACATAAACTTGAAGGTT
ENSMUSG00000036815	Dpp10	1	123321471	124846039	ENSMUST00000112606.7	238	263	+	-4.33083	4.21e-05	0.15	AAAAAAATTAGTTTCACATTAAAGTA
ENSMUSG00000036815	Dpp10	1	123321471	124846039	ENSMUST00000112606.7	1572	1597	+	1.57143	7.72e-06	0.0794	AAAACCAGGAAGAAAATTTTAAAGTA
ENSMUSG00000071454	Dtnb	12	3572381	3781796	ENSMUST00000174479.7	2624	2649	+	12.1805	1.94e-07	0.0658	AAAAATGTTATGAAAACTTTGAAATG
ENSMUSG00000069255	Dusp22	13	30659999	30711231	ENSMUST00000221725.1	2004	2029	+	-4.18045	4.04e-05	0.148	AAAAAAAAAAAAAAAAAGGAGAAGCC
ENSMUSG00000069255	Dusp22	13	30659999	30711231	ENSMUST00000221725.1	1999	2024	+	-6.27068	7e-05	0.171	ACCAAAAAAAAAAAAAAAAAAAGGAG
ENSMUSG00000069255	Dusp22	13	30659999	30711231	ENSMUST00000221725.1	2002	2027	+	0.0300752	1.17e-05	0.0874	AAAAAAAAAAAAAAAAAAAGGAGAAG
ENSMUSG00000069255	Dusp22	13	30659999	30711231	ENSMUST00000221725.1	1998	2023	+	-7.57143	9.34e-05	0.177	AACCAAAAAAAAAAAAAAAAAAAGGA
ENSMUSG00000039661	Dusp26	8	31089471	31097047	ENSMUST00000036631.13	328	353	+	-7.06767	8.38e-05	0.177	AAACAAAGGACCACTGCCCTGAAGTA
ENSMUSG00000034765	Dusp5	19	53529109	53542431	ENSMUST00000038287.6	1084	1109	+	6.21053	1.64e-06	0.0692	ATAACAAAAAAAAAAAAATCCAAGTG
ENSMUSG00000019960	Dusp6	10	99263231	99267489	ENSMUST00000220291.1	1000	1025	+	2.35338	6.03e-06	0.0794	TAAAAAAAAATACGAAACTGGAAGTG
ENSMUSG00000019960	Dusp6	10	99263231	99267489	ENSMUST00000220291.1	463	488	+	-4.41353	4.33e-05	0.152	ACAAAAAAAATTAAAACCTGATACTT
ENSMUSG00000019960	Dusp6	10	99263231	99267489	ENSMUST00000220291.1	1138	1163	+	-4.08271	3.94e-05	0.147	TTATAAGAATGTAAAACCTTAAATTA
ENSMUSG00000037259	Dzank1	2	144470557	144527414	ENSMUST00000081982.11	4342	4367	+	-3.56391	3.33e-05	0.134	AATAAAGTAAAAAAACTACTGAACTA
ENSMUSG00000037259	Dzank1	2	144470557	144527414	ENSMUST00000081982.11	1155	1180	+	-1.85714	1.93e-05	0.0963	TACACAAGGAGGATAACATAAAAGTA
ENSMUSG00000048747	E130114P18Rik	4	97568133	97778078	ENSMUST00000107068.8	249	274	+	-7.78195	9.85e-05	0.177	TGGAAAGGAAAAACAACCTCACAGGG
ENSMUSG00000026051	Ecrg4	1	43730602	43742578	ENSMUST00000027217.8	138	163	+	-4.13534	3.99e-05	0.147	AAAATAGAAATAAAAGCATTTAAAAA
ENSMUSG00000026495	Efcab2	1	178406085	178484513	ENSMUST00000027775.8	2615	2640	+	-7.42857	9.08e-05	0.177	CAAAAAAAAAAAAAAAAAAAAAAAAG
ENSMUSG00000026495	Efcab2	1	178406085	178484513	ENSMUST00000027775.8	2630	2655	+	1.92481	6.99e-06	0.0794	AAAAAAAAAAGATCAAGATTGATGAG
ENSMUSG00000026495	Efcab2	1	178406085	178484513	ENSMUST00000027775.8	2624	2649	+	-2.32331	2.24e-05	0.106	AAAAAAAAAAAAAAAAGATCAAGATT
ENSMUSG00000026495	Efcab2	1	178406085	178484513	ENSMUST00000027775.8	2623	2648	+	-5	5.12e-05	0.16	AAAAAAAAAAAAAAAAAGATCAAGAT
ENSMUSG00000026495	Efcab2	1	178406085	178484513	ENSMUST00000027775.8	2625	2650	+	4.6015	2.7e-06	0.0794	AAAAAAAAAAAAAAAGATCAAGATTG
ENSMUSG00000026495	Efcab2	1	178406085	178484513	ENSMUST00000027775.8	2617	2642	+	-0.81203	1.45e-05	0.088	AAAAAAAAAAAAAAAAAAAAAAAGAT
ENSMUSG00000040659	Efhd2	4	141858142	141874920	ENSMUST00000036854.3	1327	1352	+	-0.218045	1.24e-05	0.0874	AAAAAAAGAAAAAAAGAAAAAAACTA
ENSMUSG00000008489	Elavl2	4	91250763	91400785	ENSMUST00000008633.14	1554	1579	+	-1.4812	1.74e-05	0.095	AAAAAAAAAAGAAAAAAATGAGTATA
ENSMUSG00000008489	Elavl2	4	91250763	91400785	ENSMUST00000008633.14	2131	2156	+	-7.74436	9.74e-05	0.177	AAAAAAAATAAAATAAAATACATGTA
ENSMUSG00000028546	Elavl4	4	110203722	110351909	ENSMUST00000106598.7	212	237	+	-5.78195	6.25e-05	0.166	AAAAACAAAAAAATACCTTTGATGCA
ENSMUSG00000028546	Elavl4	4	110203722	110351909	ENSMUST00000106598.7	199	224	+	-0.56391	1.37e-05	0.088	AAAAAAAGAAAAAAAAAACAAAAAAA
ENSMUSG00000028546	Elavl4	4	110203722	110351909	ENSMUST00000106598.7	2403	2428	+	-5.30075	5.52e-05	0.163	AAAAAAGGAAAAAAAATCTTAGGACC
ENSMUSG00000028546	Elavl4	4	110203722	110351909	ENSMUST00000106598.7	201	226	+	-0.789474	1.44e-05	0.088	AAAAAGAAAAAAAAAACAAAAAAATA
ENSMUSG00000028546	Elavl4	4	110203722	110351909	ENSMUST00000106598.7	1848	1873	+	-7.20301	8.66e-05	0.177	ATGAAACAAAAAAAAATACAAGAGTT
ENSMUSG00000028546	Elavl4	4	110203722	110351909	ENSMUST00000106598.7	200	225	+	-5.62406	6.05e-05	0.166	AAAAAAGAAAAAAAAAACAAAAAAAT
ENSMUSG00000028546	Elavl4	4	110203722	110351909	ENSMUST00000106598.7	2402	2427	+	-5.11278	5.27e-05	0.16	AAAAAAAGGAAAAAAAATCTTAGGAC
ENSMUSG00000041986	Elmod1	9	53911457	53975301	ENSMUST00000048409.13	1020	1045	+	-2.70677	2.52e-05	0.113	AAAAAAACAAGATCATCCTCAAACTG
ENSMUSG00000029245	Epha5	5	84054761	84417382	ENSMUST00000053733.14	1230	1255	+	-1.69173	1.84e-05	0.0952	AAAAAGTGAAGAAAAATTATGATTTG
ENSMUSG00000028289	Epha7	4	28813131	28967499	ENSMUST00000029964.11	758	783	+	-6.56391	7.49e-05	0.172	AAAAAAAAAAAAAAAAGAAAGCAATA
ENSMUSG00000028289	Epha7	4	28813131	28967499	ENSMUST00000029964.11	755	780	+	-7.69925	9.61e-05	0.177	TGAAAAAAAAAAAAAAAAAGAAAGCA
ENSMUSG00000028289	Epha7	4	28813131	28967499	ENSMUST00000029964.11	761	786	+	-6.69925	7.69e-05	0.172	AAAAAAAAAAAAAGAAAGCAATAATG
ENSMUSG00000028289	Epha7	4	28813131	28967499	ENSMUST00000029964.11	763	788	+	7.39098	1.17e-06	0.0692	AAAAAAAAAAAGAAAGCAATAATGAT
ENSMUSG00000028289	Epha7	4	28813131	28967499	ENSMUST00000029964.11	759	784	+	-7.71429	9.64e-05	0.177	AAAAAAAAAAAAAAAGAAAGCAATAA
ENSMUSG00000040640	Erc2	14	27622428	28478537	ENSMUST00000210135.1	2785	2810	+	-3.09023	2.88e-05	0.124	ATAAAATTAAGGAACCCTCGAAACTA
ENSMUSG00000026610	Esrrg	1	187608791	188214885	ENSMUST00000027906.12	3248	3273	+	-1.92481	1.96e-05	0.0972	ATAAAAGATATAAAAAATTTAAAACT
ENSMUSG00000026610	Esrrg	1	187608791	188214885	ENSMUST00000027906.12	38	63	+	-1.49624	1.75e-05	0.0951	GAAAAGGGAAGATAAACCCAAGAATG
ENSMUSG00000036617	Etl4	2	19909780	20810713	ENSMUST00000114606.7	2054	2079	+	-7.7594	9.79e-05	0.177	TACAAATATAAATAAACATCAAAATA
ENSMUSG00000019232	Etnppl	3	130617448	130637521	ENSMUST00000072271.12	425	450	+	-5.30827	5.53e-05	0.163	CTAACAAAAATGAAGACTATAAAATG
ENSMUSG00000035104	Eva1a	6	82041043	82093099	ENSMUST00000042974.14	374	399	+	-5.80451	6.28e-05	0.166	ATAAAAGGAAAAAAAAATCTCATAGC
ENSMUSG00000035104	Eva1a	6	82041043	82093099	ENSMUST00000042974.14	524	549	+	-6.66917	7.65e-05	0.172	AAAACAGAAAAAAAATCTTGACAACC
ENSMUSG00000028128	F3	3	121723537	121735048	ENSMUST00000029771.12	348	373	+	-7.2782	8.79e-05	0.177	TTCATAGGCTGTAGAACAGTAAAGTG
ENSMUSG00000038174	Fam126b	1	58522806	58586323	ENSMUST00000161600.7	4949	4974	+	-6.15038	6.78e-05	0.168	ACCAAAAAAAAAAAAAAAAGGTAGAA
ENSMUSG00000038174	Fam126b	1	58522806	58586323	ENSMUST00000161600.7	2405	2430	+	-6.95489	8.14e-05	0.175	AAGAAAAAAAAAAAAAAAAAAAGGTT
ENSMUSG00000038174	Fam126b	1	58522806	58586323	ENSMUST00000161600.7	4953	4978	+	-2.03759	2.04e-05	0.1	AAAAAAAAAAAAAAAGGTAGAATTAG
ENSMUSG00000038174	Fam126b	1	58522806	58586323	ENSMUST00000161600.7	2408	2433	+	-7.41353	9.05e-05	0.177	AAAAAAAAAAAAAAAAAAAGGTTTTT
ENSMUSG00000038174	Fam126b	1	58522806	58586323	ENSMUST00000161600.7	6500	6525	+	-6.12782	6.75e-05	0.168	AGCTGAAGAAAAAAAAAACCAAAATG
ENSMUSG00000038174	Fam126b	1	58522806	58586323	ENSMUST00000161600.7	5463	5488	+	-4.66165	4.69e-05	0.157	AATAAATGGGGGAAACTCCTGAAGTT
ENSMUSG00000038174	Fam126b	1	58522806	58586323	ENSMUST00000161600.7	2404	2429	+	-7.42857	9.08e-05	0.177	AAAGAAAAAAAAAAAAAAAAAAAGGT
ENSMUSG00000038174	Fam126b	1	58522806	58586323	ENSMUST00000161600.7	2403	2428	+	-7.42857	9.08e-05	0.177	AAAAGAAAAAAAAAAAAAAAAAAAGG
ENSMUSG00000038174	Fam126b	1	58522806	58586323	ENSMUST00000161600.7	4952	4977	+	0.924812	9.33e-06	0.0833	AAAAAAAAAAAAAAAAGGTAGAATTA
ENSMUSG00000079157	Fam155a	8	9205902	9771161	ENSMUST00000110969.4	537	562	+	-5.75188	6.22e-05	0.166	AACACAAAAAAGAAAACAACAAAAAT
ENSMUSG00000079157	Fam155a	8	9205902	9771161	ENSMUST00000110969.4	523	548	+	-5.16541	5.32e-05	0.16	AAAACACACAAAAAAACACAAAAAAG
ENSMUSG00000041817	Fam169a	13	97067286	97131013	ENSMUST00000169863.8	1495	1520	+	3.83459	3.54e-06	0.0794	AAACCAAATAGCAAACCCTTGAAGTT
ENSMUSG00000070476	Fam217b	2	178414524	178424428	ENSMUST00000094251.10	754	779	+	-6.45865	7.33e-05	0.172	AAAAAAAAAAAAAAAAAAAAGAATGC
ENSMUSG00000070476	Fam217b	2	178414524	178424428	ENSMUST00000094251.10	755	780	+	-1.66165	1.82e-05	0.0951	AAAAAAAAAAAAAAAAAAAGAATGCC
ENSMUSG00000070476	Fam217b	2	178414524	178424428	ENSMUST00000094251.10	758	783	+	0.0902256	1.16e-05	0.0874	AAAAAAAAAAAAAAAAGAATGCCTTG
ENSMUSG00000070476	Fam217b	2	178414524	178424428	ENSMUST00000094251.10	749	774	+	-6.99248	8.19e-05	0.176	AGCAAAAAAAAAAAAAAAAAAAAAAG
ENSMUSG00000070476	Fam217b	2	178414524	178424428	ENSMUST00000094251.10	751	776	+	-7.42857	9.08e-05	0.177	CAAAAAAAAAAAAAAAAAAAAAAGAA
ENSMUSG00000070476	Fam217b	2	178414524	178424428	ENSMUST00000094251.10	753	778	+	-0.917293	1.48e-05	0.0881	AAAAAAAAAAAAAAAAAAAAAGAATG
ENSMUSG00000070476	Fam217b	2	178414524	178424428	ENSMUST00000094251.10	759	784	+	-7.67669	9.57e-05	0.177	AAAAAAAAAAAAAAAGAATGCCTTGG
ENSMUSG00000070476	Fam217b	2	178414524	178424428	ENSMUST00000094251.10	763	788	+	-4.7218	4.76e-05	0.158	AAAAAAAAAAAGAATGCCTTGGCACA
ENSMUSG00000020589	Fam49a	12	12262139	12380965	ENSMUST00000069066.13	4411	4436	+	-2.2406	2.19e-05	0.104	TAAACAGGAAAGAAGATTTTGGAGTA
ENSMUSG00000032224	Fam81a	9	70088511	70142560	ENSMUST00000034749.15	311	336	+	0.511278	1.04e-05	0.0846	AAAAAAAAAAAAAACCCACCATGGTG
ENSMUSG00000032224	Fam81a	9	70088511	70142560	ENSMUST00000034749.15	552	577	+	-5.97744	6.52e-05	0.166	GAGAGAAAAAAAAAAGCCCTGCAATT
ENSMUSG00000032507	Fbxl2	9	113963637	114046191	ENSMUST00000035090.13	1980	2005	+	-7.34586	8.92e-05	0.177	AGCAAAGGGAAGGACGGATGGGAGCG
ENSMUSG00000050503	Fbxl22	9	66508375	66514609	ENSMUST00000056890.9	3093	3118	+	-1.03759	1.53e-05	0.0895	AAAATACAGAGGAAAACCTGACTGAG
ENSMUSG00000047013	Fbxo41	6	85469574	85502994	ENSMUST00000159062.7	2485	2510	+	-6.91729	8.07e-05	0.175	TAAAAAAAAAAAAAACATTAACAGAG
ENSMUSG00000047013	Fbxo41	6	85469574	85502994	ENSMUST00000159062.7	2484	2509	+	-3.13534	2.91e-05	0.125	TTAAAAAAAAAAAAAACATTAACAGA
ENSMUSG00000028086	Fbxw7	3	84815268	84979198	ENSMUST00000107679.7	105	130	+	-7.57143	9.34e-05	0.177	AACAGAAAAAAAAAAAGAGAAAAAAG
ENSMUSG00000028086	Fbxw7	3	84815268	84979198	ENSMUST00000107679.7	70	95	+	0.368421	1.08e-05	0.086	AACAAAAACAAACAAACAAAAAAATG
ENSMUSG00000028086	Fbxw7	3	84815268	84979198	ENSMUST00000107679.7	76	101	+	-6.71429	7.71e-05	0.172	AACAAACAAACAAAAAAATGAAAAAA
ENSMUSG00000028086	Fbxw7	3	84815268	84979198	ENSMUST00000107679.7	84	109	+	-4.32331	4.2e-05	0.15	AACAAAAAAATGAAAAAAAAAAACAG
ENSMUSG00000028086	Fbxw7	3	84815268	84979198	ENSMUST00000107679.7	98	123	+	1.6015	7.67e-06	0.0794	AAAAAAAAACAGAAAAAAAAAAAGAG
ENSMUSG00000028086	Fbxw7	3	84815268	84979198	ENSMUST00000107679.7	111	136	+	0.0300752	1.17e-05	0.0874	AAAAAAAAAAGAGAAAAAAGAAAAGG
ENSMUSG00000028086	Fbxw7	3	84815268	84979198	ENSMUST00000107679.7	112	137	+	-5.73684	6.19e-05	0.166	AAAAAAAAAGAGAAAAAAGAAAAGGA
ENSMUSG00000028086	Fbxw7	3	84815268	84979198	ENSMUST00000107679.7	89	114	+	-5.48872	5.85e-05	0.166	AAAAATGAAAAAAAAAAACAGAAAAA
ENSMUSG00000028086	Fbxw7	3	84815268	84979198	ENSMUST00000107679.7	110	135	+	-4.04511	3.89e-05	0.146	AAAAAAAAAAAGAGAAAAAAGAAAAG
ENSMUSG00000038524	Fchsd1	18	37957431	37969774	ENSMUST00000043437.13	836	861	+	1.3985	8.14e-06	0.0802	AAGAAAGGAAGGGAAGCAGTGTTGTT
ENSMUSG00000022523	Fgf12	16	28160098	28753068	ENSMUST00000100024.2	239	264	+	-4.3609	4.25e-05	0.15	ATAAGAGCAAAGGAAAAAATAAATTG
ENSMUSG00000022523	Fgf12	16	28160098	28753068	ENSMUST00000100024.2	244	269	+	-4.11278	3.97e-05	0.147	AGCAAAGGAAAAAATAAATTGGACTC
ENSMUSG00000021974	Fgf9	14	58070547	58112720	ENSMUST00000165526.8	598	623	+	0.503759	1.04e-05	0.0846	AAAAAAGAAAAAAAAGAAAAAAGGTT
ENSMUSG00000021974	Fgf9	14	58070547	58112720	ENSMUST00000165526.8	550	575	+	-5.73684	6.19e-05	0.166	AAAAAAAAAAGAAAGAAAAAAAAGAA
ENSMUSG00000021974	Fgf9	14	58070547	58112720	ENSMUST00000165526.8	549	574	+	-6.72932	7.72e-05	0.172	AAAAAAAAAAAGAAAGAAAAAAAAGA
ENSMUSG00000021974	Fgf9	14	58070547	58112720	ENSMUST00000165526.8	554	579	+	1	9.18e-06	0.0833	AAAAAAGAAAGAAAAAAAAGAAAAGA
ENSMUSG00000021974	Fgf9	14	58070547	58112720	ENSMUST00000165526.8	585	610	+	-4.06015	3.91e-05	0.147	AAAAAAACAAGGAAAAAAAGAAAAAA
ENSMUSG00000021974	Fgf9	14	58070547	58112720	ENSMUST00000165526.8	548	573	+	-7.42857	9.08e-05	0.177	AAAAAAAAAAAAGAAAGAAAAAAAAG
ENSMUSG00000021974	Fgf9	14	58070547	58112720	ENSMUST00000165526.8	576	601	+	-5.30075	5.52e-05	0.163	AAGAAAAAGAAAAAAACAAGGAAAAA
ENSMUSG00000021974	Fgf9	14	58070547	58112720	ENSMUST00000165526.8	553	578	+	4.26316	3.05e-06	0.0794	AAAAAAAGAAAGAAAAAAAAGAAAAG
ENSMUSG00000021974	Fgf9	14	58070547	58112720	ENSMUST00000165526.8	597	622	+	0.879699	9.44e-06	0.0833	AAAAAAAGAAAAAAAAGAAAAAAGGT
ENSMUSG00000026526	Fh1	1	175600374	175625635	ENSMUST00000027810.13	913	938	+	-3.97744	3.82e-05	0.146	TAAATGAAAATGAGAACATTAAAGAG
ENSMUSG00000025175	Fn3k	11	121434913	121450491	ENSMUST00000103014.3	2960	2985	+	-0.759398	1.43e-05	0.088	TAAAAAGAACAATAAAAATGAAACTG
ENSMUSG00000039735	Fnbp1l	3	122538719	122619715	ENSMUST00000162947.2	1407	1432	+	-1.76692	1.88e-05	0.0952	AAGAAGGAAAAGAAAAGCCAGCAATG
ENSMUSG00000001334	Fndc5	4	129136999	129144593	ENSMUST00000102600.3	771	796	+	-0.766917	1.43e-05	0.088	AAAAAAAAAAAAAAAAAAATCAAATA
ENSMUSG00000001334	Fndc5	4	129136999	129144593	ENSMUST00000102600.3	766	791	+	-1.6391	1.81e-05	0.0951	AAAAAAAAAAAAAAAAAAAAAAAATC
ENSMUSG00000001334	Fndc5	4	129136999	129144593	ENSMUST00000102600.3	773	798	+	-1.6391	1.81e-05	0.0951	AAAAAAAAAAAAAAAAATCAAATAAG
ENSMUSG00000001334	Fndc5	4	129136999	129144593	ENSMUST00000102600.3	775	800	+	-4.44361	4.36e-05	0.152	AAAAAAAAAAAAAAATCAAATAAGCC
ENSMUSG00000001334	Fndc5	4	129136999	129144593	ENSMUST00000102600.3	1538	1563	+	-6.15789	6.8e-05	0.168	TTAAAAAAAAAAAGGTGCTTGATGTG
ENSMUSG00000001334	Fndc5	4	129136999	129144593	ENSMUST00000102600.3	772	797	+	-2.21805	2.17e-05	0.104	AAAAAAAAAAAAAAAAAATCAAATAA
ENSMUSG00000030067	Foxp1	6	98925338	99522721	ENSMUST00000113326.8	64	89	+	-0.37594	1.29e-05	0.088	AAAAAAATAAAAAAAGAAAGAAAGGA
ENSMUSG00000030067	Foxp1	6	98925338	99522721	ENSMUST00000113326.8	4172	4197	+	-2.70677	2.52e-05	0.113	TAAAAAAATAAAACAAAATGATAGAG
ENSMUSG00000030067	Foxp1	6	98925338	99522721	ENSMUST00000113326.8	41	66	+	-7.35338	8.94e-05	0.177	AAAAAAAGCAAAACAAATTTAAAAAA
ENSMUSG00000030067	Foxp1	6	98925338	99522721	ENSMUST00000113326.8	3315	3340	+	-3.20301	2.98e-05	0.126	AAAAAAAGAAGAGGAAGAAGGAAAAG
ENSMUSG00000030067	Foxp1	6	98925338	99522721	ENSMUST00000113326.8	2994	3019	+	-1.03759	1.53e-05	0.0895	AAAAAAAAAAAAAAAGTTCTCAGGCT
ENSMUSG00000030067	Foxp1	6	98925338	99522721	ENSMUST00000113326.8	933	958	+	-6.00752	6.55e-05	0.166	AAAAAAAAAAAAAGAGAAAAGAAAAG
ENSMUSG00000030067	Foxp1	6	98925338	99522721	ENSMUST00000113326.8	935	960	+	-5.73684	6.19e-05	0.166	AAAAAAAAAAAGAGAAAAGAAAAGAA
ENSMUSG00000030067	Foxp1	6	98925338	99522721	ENSMUST00000113326.8	73	98	+	-2.62406	2.44e-05	0.111	AAAAAAGAAAGAAAGGAAAAGAAAAG
ENSMUSG00000030067	Foxp1	6	98925338	99522721	ENSMUST00000113326.8	954	979	+	-7.31579	8.88e-05	0.177	AAAAGAAAAAAAAAGATCCCAAAGGC
ENSMUSG00000030067	Foxp1	6	98925338	99522721	ENSMUST00000113326.8	63	88	+	-0.203008	1.24e-05	0.0874	AAAAAAAATAAAAAAAGAAAGAAAGG
ENSMUSG00000030067	Foxp1	6	98925338	99522721	ENSMUST00000113326.8	60	85	+	-6.7218	7.71e-05	0.172	TAAAAAAAAAATAAAAAAAGAAAGAA
ENSMUSG00000030067	Foxp1	6	98925338	99522721	ENSMUST00000113326.8	68	93	+	1.45113	7.98e-06	0.0794	AAATAAAAAAAGAAAGAAAGGAAAAG
ENSMUSG00000030067	Foxp1	6	98925338	99522721	ENSMUST00000113326.8	3235	3260	+	-7.7594	9.79e-05	0.177	TAAAAAGGAATAAATGCATACACCTG
ENSMUSG00000029563	Foxp2	6	14901349	15441977	ENSMUST00000115477.7	1404	1429	+	-6.7218	7.71e-05	0.172	AACAAAAAACAAAAAACAAAAAGTAG
ENSMUSG00000029563	Foxp2	6	14901349	15441977	ENSMUST00000115477.7	2091	2116	+	-0.691729	1.41e-05	0.088	AAAAAAAAAAGAAAAAAAGGAAAAAA
ENSMUSG00000029563	Foxp2	6	14901349	15441977	ENSMUST00000115477.7	2085	2110	+	-0.81203	1.45e-05	0.088	AAAAAAAAAAAAAAAAGAAAAAAAGG
ENSMUSG00000029563	Foxp2	6	14901349	15441977	ENSMUST00000115477.7	1397	1422	+	-7.30075	8.84e-05	0.177	AAAAAAAAACAAAAAACAAAAAACAA
ENSMUSG00000029563	Foxp2	6	14901349	15441977	ENSMUST00000115477.7	2102	2127	+	-4.32331	4.2e-05	0.15	AAAAAAAGGAAAAAAAAACACAAGAA
ENSMUSG00000029563	Foxp2	6	14901349	15441977	ENSMUST00000115477.7	2078	2103	+	-7.42857	9.08e-05	0.177	AAAAAGAAAAAAAAAAAAAAAAAGAA
ENSMUSG00000029563	Foxp2	6	14901349	15441977	ENSMUST00000115477.7	2076	2101	+	-5.73684	6.19e-05	0.166	GAAAAAAGAAAAAAAAAAAAAAAAAG
ENSMUSG00000029563	Foxp2	6	14901349	15441977	ENSMUST00000115477.7	1050	1075	+	-5.73684	6.19e-05	0.166	AAAAACAAAAAAACAACCCACAACTA
ENSMUSG00000029563	Foxp2	6	14901349	15441977	ENSMUST00000115477.7	2086	2111	+	-1.08271	1.55e-05	0.0897	AAAAAAAAAAAAAAAGAAAAAAAGGA
ENSMUSG00000029563	Foxp2	6	14901349	15441977	ENSMUST00000115477.7	1403	1428	+	-5.14286	5.3e-05	0.16	AAACAAAAAACAAAAAACAAAAAGTA
ENSMUSG00000029563	Foxp2	6	14901349	15441977	ENSMUST00000115477.7	2090	2115	+	1	9.18e-06	0.0833	AAAAAAAAAAAGAAAAAAAGGAAAAA
ENSMUSG00000029563	Foxp2	6	14901349	15441977	ENSMUST00000115477.7	2104	2129	+	-6.33083	7.13e-05	0.172	AAAAAGGAAAAAAAAACACAAGAAAA
ENSMUSG00000029563	Foxp2	6	14901349	15441977	ENSMUST00000115477.7	2084	2109	+	-5.87218	6.37e-05	0.166	AAAAAAAAAAAAAAAAAGAAAAAAAG
ENSMUSG00000029563	Foxp2	6	14901349	15441977	ENSMUST00000115477.7	2094	2119	+	-6.72932	7.72e-05	0.172	AAAAAAAGAAAAAAAGGAAAAAAAAA
ENSMUSG00000029563	Foxp2	6	14901349	15441977	ENSMUST00000115477.7	2077	2102	+	-6.45865	7.33e-05	0.172	AAAAAAGAAAAAAAAAAAAAAAAAGA
ENSMUSG00000029563	Foxp2	6	14901349	15441977	ENSMUST00000115477.7	2128	2153	+	-5.55639	5.93e-05	0.166	AAAAAAAGAGAAAAAAGTTAGAACAA
ENSMUSG00000045589	Frrs1l	4	56957173	56990391	ENSMUST00000053681.5	2853	2878	+	1.45113	7.98e-06	0.0794	AAAGAAAGAAAGAAAGAAAGAAAGAA
ENSMUSG00000045589	Frrs1l	4	56957173	56990391	ENSMUST00000053681.5	2861	2886	+	1.45113	7.98e-06	0.0794	AAAGAAAGAAAGAAAGAAAGAAAGAA
ENSMUSG00000045589	Frrs1l	4	56957173	56990391	ENSMUST00000053681.5	2977	3002	+	5.41353	2.06e-06	0.0711	AAGAAAGAAAGGAAAGGAAGGAAGGA
ENSMUSG00000045589	Frrs1l	4	56957173	56990391	ENSMUST00000053681.5	2897	2922	+	-3.86466	3.68e-05	0.143	GAAGAAAGGAAGAAAGAAAGAAAGAG
ENSMUSG00000045589	Frrs1l	4	56957173	56990391	ENSMUST00000053681.5	2869	2894	+	1.45113	7.98e-06	0.0794	AAAGAAAGAAAGAAAGAAAGAAAGAA
ENSMUSG00000045589	Frrs1l	4	56957173	56990391	ENSMUST00000053681.5	2981	3006	+	-1.20301	1.6e-05	0.0905	AAGAAAGGAAAGGAAGGAAGGAAGAA
ENSMUSG00000045589	Frrs1l	4	56957173	56990391	ENSMUST00000053681.5	2833	2858	+	-5.16541	5.32e-05	0.16	GAAGAAAGAAAGAAAGAAAGAAAGAA
ENSMUSG00000045589	Frrs1l	4	56957173	56990391	ENSMUST00000053681.5	2873	2898	+	1.45113	7.98e-06	0.0794	AAAGAAAGAAAGAAAGAAAGAAAGGA
ENSMUSG00000045589	Frrs1l	4	56957173	56990391	ENSMUST00000053681.5	2885	2910	+	-3.47368	3.22e-05	0.133	AAAGAAAGAAAGGAAGAAAGGAAGAA
ENSMUSG00000045589	Frrs1l	4	56957173	56990391	ENSMUST00000053681.5	2857	2882	+	1.45113	7.98e-06	0.0794	AAAGAAAGAAAGAAAGAAAGAAAGAA
ENSMUSG00000045589	Frrs1l	4	56957173	56990391	ENSMUST00000053681.5	3802	3827	+	-0.105263	1.21e-05	0.0874	CTCAAAAACAAACAAGCATGGCTGTG
ENSMUSG00000045589	Frrs1l	4	56957173	56990391	ENSMUST00000053681.5	2881	2906	+	1.45113	7.98e-06	0.0794	AAAGAAAGAAAGAAAGGAAGAAAGGA
ENSMUSG00000045589	Frrs1l	4	56957173	56990391	ENSMUST00000053681.5	2837	2862	+	1.45113	7.98e-06	0.0794	AAAGAAAGAAAGAAAGAAAGAAAGAA
ENSMUSG00000045589	Frrs1l	4	56957173	56990391	ENSMUST00000053681.5	2849	2874	+	1.45113	7.98e-06	0.0794	AAAGAAAGAAAGAAAGAAAGAAAGAA
ENSMUSG00000045589	Frrs1l	4	56957173	56990391	ENSMUST00000053681.5	2969	2994	+	-5.97744	6.52e-05	0.166	ATAGAAAGAAGAAAGAAAGGAAAGGA
ENSMUSG00000045589	Frrs1l	4	56957173	56990391	ENSMUST00000053681.5	2841	2866	+	1.45113	7.98e-06	0.0794	AAAGAAAGAAAGAAAGAAAGAAAGAA
ENSMUSG00000045589	Frrs1l	4	56957173	56990391	ENSMUST00000053681.5	2889	2914	+	-4.58647	4.56e-05	0.155	AAAGAAAGGAAGAAAGGAAGAAAGAA
ENSMUSG00000045589	Frrs1l	4	56957173	56990391	ENSMUST00000053681.5	2845	2870	+	1.45113	7.98e-06	0.0794	AAAGAAAGAAAGAAAGAAAGAAAGAA
ENSMUSG00000045589	Frrs1l	4	56957173	56990391	ENSMUST00000053681.5	2973	2998	+	-3.47368	3.22e-05	0.133	AAAGAAGAAAGAAAGGAAAGGAAGGA
ENSMUSG00000045589	Frrs1l	4	56957173	56990391	ENSMUST00000053681.5	2865	2890	+	1.45113	7.98e-06	0.0794	AAAGAAAGAAAGAAAGAAAGAAAGAA
ENSMUSG00000045589	Frrs1l	4	56957173	56990391	ENSMUST00000053681.5	2901	2926	+	-4.44361	4.36e-05	0.152	AAAGGAAGAAAGAAAGAAAGAGAGAG
ENSMUSG00000045589	Frrs1l	4	56957173	56990391	ENSMUST00000053681.5	2877	2902	+	3.14286	4.55e-06	0.0794	AAAGAAAGAAAGAAAGAAAGGAAGAA
ENSMUSG00000045589	Frrs1l	4	56957173	56990391	ENSMUST00000053681.5	2575	2600	+	-5.94737	6.48e-05	0.166	AAAAAGAAAAAAAACCAAGTGAAGTA
ENSMUSG00000055373	Fut9	4	25609332	25800244	ENSMUST00000084770.4	6444	6469	+	-6.34586	7.15e-05	0.172	AAAAAAGGGAAGAGTTCAAAAATGTG
ENSMUSG00000055373	Fut9	4	25609332	25800244	ENSMUST00000084770.4	5004	5029	+	-2.59398	2.43e-05	0.111	AAAAAACAAAACAAAACGATAAAGGA
ENSMUSG00000055373	Fut9	4	25609332	25800244	ENSMUST00000084770.4	926	951	+	8.87218	7.2e-07	0.0692	ATAAATAGAAGTAAAACTTGAAAGAT
ENSMUSG00000055373	Fut9	4	25609332	25800244	ENSMUST00000084770.4	7483	7508	+	-2.52632	2.37e-05	0.11	CTAAAGAATAAAAAAACATTGAATAT
ENSMUSG00000039809	Gabbr2	4	46662305	46991873	ENSMUST00000107749.3	2001	2026	+	-7.42105	9.06e-05	0.177	AAAAAAAAAAACAAAAATCAAAAAAC
ENSMUSG00000039809	Gabbr2	4	46662305	46991873	ENSMUST00000107749.3	2016	2041	+	-5.34586	5.61e-05	0.164	AATCAAAAAACAAAAGTATTGGATTG
ENSMUSG00000039809	Gabbr2	4	46662305	46991873	ENSMUST00000107749.3	2008	2033	+	-5.14286	5.3e-05	0.16	AAAACAAAAATCAAAAAACAAAAGTA
ENSMUSG00000010803	Gabra1	11	42130939	42182930	ENSMUST00000020707.11	283	308	+	-3.57143	3.34e-05	0.134	AGAAAAAGTAGAAAAAACCAGAGCTT
ENSMUSG00000010803	Gabra1	11	42130939	42182930	ENSMUST00000020707.11	1914	1939	+	-0.654135	1.39e-05	0.088	AAAAAAAAAAAAAAAAAATGGCTGAA
ENSMUSG00000010803	Gabra1	11	42130939	42182930	ENSMUST00000020707.11	1917	1942	+	-5.72932	6.19e-05	0.166	AAAAAAAAAAAAAAATGGCTGAACAA
ENSMUSG00000010803	Gabra1	11	42130939	42182930	ENSMUST00000020707.11	775	800	+	-5.63158	6.06e-05	0.166	ATAAAAGAATGGAATAATTTAAAAAC
ENSMUSG00000000560	Gabra2	5	70957597	71095849	ENSMUST00000197284.4	801	826	+	-3.56391	3.33e-05	0.134	ATAAGAAGAAGAAGAAGAAGGAGGAG
ENSMUSG00000000560	Gabra2	5	70957597	71095849	ENSMUST00000197284.4	1989	2014	+	8.39098	8.6e-07	0.0692	AAAAAAAAAAAAAAAACCTCGCTGTT
ENSMUSG00000000560	Gabra2	5	70957597	71095849	ENSMUST00000197284.4	1990	2015	+	-6.94737	8.13e-05	0.175	AAAAAAAAAAAAAAACCTCGCTGTTC
ENSMUSG00000000560	Gabra2	5	70957597	71095849	ENSMUST00000197284.4	1987	2012	+	-6.69925	7.69e-05	0.172	AAAAAAAAAAAAAAAAAACCTCGCTG
ENSMUSG00000000560	Gabra2	5	70957597	71095849	ENSMUST00000197284.4	2643	2668	+	2.86466	5.08e-06	0.0794	AGAAAAGAAAATACATCTTTAAAATG
ENSMUSG00000029211	Gabra4	5	71569749	71658308	ENSMUST00000031121.9	316	341	+	-5.97744	6.52e-05	0.166	GAAAAAAAAAAGAAAGACTGTGAATT
ENSMUSG00000029211	Gabra4	5	71569749	71658308	ENSMUST00000031121.9	317	342	+	8.42105	8.52e-07	0.0692	AAAAAAAAAAGAAAGACTGTGAATTT
ENSMUSG00000020436	Gabrg2	11	41910203	42000857	ENSMUST00000070725.10	1406	1431	+	-0.894737	1.48e-05	0.0881	ATTAAAAGCAGGAACAATATTAAGTG
ENSMUSG00000026787	Gad2	2	22622205	22693874	ENSMUST00000028123.3	3411	3436	+	-5.97744	6.52e-05	0.166	GAAAAAATAAAATAAAAACAAATGTG
ENSMUSG00000047261	Gap43	16	42248442	42340651	ENSMUST00000102817.4	156	181	+	5.53383	1.98e-06	0.0709	AAAGAAAAAAAAAAAGCAGGAAAGAT
ENSMUSG00000047261	Gap43	16	42248442	42340651	ENSMUST00000102817.4	164	189	+	5.19549	2.23e-06	0.0756	AAAAAAAGCAGGAAAGATCCCAAGTC
ENSMUSG00000022707	Gbe1	16	70313949	70569716	ENSMUST00000171132.7	656	681	+	-5	5.12e-05	0.16	AAATAAGGAAGGCCAGCCCAGTGGTT
ENSMUSG00000058624	Gda	19	21391307	21473445	ENSMUST00000087600.9	2545	2570	+	-6.03008	6.59e-05	0.167	GTAAAAGGTTAGAAGGCATTAAAAGT
ENSMUSG00000058624	Gda	19	21391307	21473445	ENSMUST00000087600.9	2906	2931	+	-5.69925	6.14e-05	0.166	AAAAAAAAAAAAAAAACCTCTTCATT
ENSMUSG00000058624	Gda	19	21391307	21473445	ENSMUST00000087600.9	3318	3343	+	0.511278	1.04e-05	0.0846	AAAAAAAATTAAAAGACCAAAAAGAG
ENSMUSG00000058624	Gda	19	21391307	21473445	ENSMUST00000087600.9	2645	2670	+	-6.38346	7.2e-05	0.172	TTAAAAAAACAAAAAGGCAGGGAGGG
ENSMUSG00000058624	Gda	19	21391307	21473445	ENSMUST00000087600.9	2907	2932	+	7.17293	1.25e-06	0.0692	AAAAAAAAAAAAAAACCTCTTCATTG
ENSMUSG00000025777	Gdap1	1	17145362	17164271	ENSMUST00000026879.7	1960	1985	+	0.511278	1.04e-05	0.0846	AAAAAAAAAAAAAAATCTACAAAAGG
ENSMUSG00000025777	Gdap1	1	17145362	17164271	ENSMUST00000026879.7	1959	1984	+	-5.7218	6.18e-05	0.166	TAAAAAAAAAAAAAAATCTACAAAAG
ENSMUSG00000025777	Gdap1	1	17145362	17164271	ENSMUST00000026879.7	1961	1986	+	-7.57143	9.34e-05	0.177	AAAAAAAAAAAAAATCTACAAAAGGT
ENSMUSG00000022103	Gfra2	14	70890120	70979838	ENSMUST00000022699.9	1117	1142	+	2.34586	6.04e-06	0.0794	AAAAAAGAAACAAAACTATGGAAATA
ENSMUSG00000022103	Gfra2	14	70890120	70979838	ENSMUST00000022699.9	1116	1141	+	-3.15038	2.93e-05	0.125	AAAAAAAGAAACAAAACTATGGAAAT
ENSMUSG00000041625	Ggact	14	122816223	122913757	ENSMUST00000038075.11	332	357	+	-7.76692	9.81e-05	0.177	AAGAAATGGCAGGAAATACTGAATTG
ENSMUSG00000029276	Glmn	5	107548967	107597888	ENSMUST00000124546.7	508	533	+	-5.96241	6.51e-05	0.166	AATCATGGAAGGAAAAAAAGGACTTG
ENSMUSG00000079357	Gm11100	14	13918334	13951132	ENSMUST00000112652.8	1073	1098	+	-0.0977444	1.2e-05	0.0874	AACAAAAAAAAAAAAACCAAACAATC
ENSMUSG00000079357	Gm11100	14	13918334	13951132	ENSMUST00000112652.8	2172	2197	+	-3.57143	3.34e-05	0.134	AAAAAAAAAAGGAATCCAAGATTTTG
ENSMUSG00000041716	Gm20604	12	102741732	102758672	ENSMUST00000174651.1	565	590	+	-4.8797	4.97e-05	0.16	ATCTGAGGTACAAAAAGCTGAGTGTG
ENSMUSG00000107023	Gm42715	7	127519584	127567054	ENSMUST00000189629.4	1790	1815	+	-2.07519	2.06e-05	0.101	TCCAAAAGAAGGAAAGGTTTGGGGTT
ENSMUSG00000107023	Gm42715	7	127519584	127567054	ENSMUST00000189629.4	601	626	+	-1.08271	1.55e-05	0.0897	AAAAAAAAAAAAAAAGAAAAAAAGAA
ENSMUSG00000107023	Gm42715	7	127519584	127567054	ENSMUST00000189629.4	609	634	+	-0.345865	1.28e-05	0.088	AAAAAAAGAAAAAAAGAAAGATTGTC
ENSMUSG00000107023	Gm42715	7	127519584	127567054	ENSMUST00000189629.4	2125	2150	+	-3.96992	3.81e-05	0.146	AAAATAGAAAAGATATGATTGAATTC
ENSMUSG00000107023	Gm42715	7	127519584	127567054	ENSMUST00000189629.4	605	630	+	6.64662	1.45e-06	0.0692	AAAAAAAAAAAGAAAAAAAGAAAGAT
ENSMUSG00000107023	Gm42715	7	127519584	127567054	ENSMUST00000189629.4	606	631	+	-6.56391	7.49e-05	0.172	AAAAAAAAAAGAAAAAAAGAAAGATT
ENSMUSG00000024524	Gnal	18	67088216	67226792	ENSMUST00000025402.14	3338	3363	+	-7.78947	9.87e-05	0.177	GACAAAAGAAAGAAGCCAAAGATATG
ENSMUSG00000040009	Gnaz	10	74967177	75016907	ENSMUST00000037813.4	676	701	+	-1.6391	1.81e-05	0.0951	AAAAAAAAAAAAAAAAAAAAAAATTA
ENSMUSG00000040009	Gnaz	10	74967177	75016907	ENSMUST00000037813.4	675	700	+	-1.6391	1.81e-05	0.0951	AAAAAAAAAAAAAAAAAAAAAAAATT
ENSMUSG00000040009	Gnaz	10	74967177	75016907	ENSMUST00000037813.4	680	705	+	-7.2782	8.79e-05	0.177	AAAAAAAAAAAAAAAAAAATTAACAC
ENSMUSG00000040009	Gnaz	10	74967177	75016907	ENSMUST00000037813.4	681	706	+	-2.90226	2.69e-05	0.117	AAAAAAAAAAAAAAAAAATTAACACA
ENSMUSG00000040009	Gnaz	10	74967177	75016907	ENSMUST00000037813.4	634	659	+	-7.20301	8.66e-05	0.177	TACAAAAAAAAAACAGCTAAAACGTA
ENSMUSG00000040009	Gnaz	10	74967177	75016907	ENSMUST00000037813.4	682	707	+	-1.6015	1.8e-05	0.0951	AAAAAAAAAAAAAAAAATTAACACAG
ENSMUSG00000043004	Gng2	14	19872559	19977627	ENSMUST00000160013.7	3159	3184	+	0.150376	1.14e-05	0.0874	TGTTAAAGCAGGAAAACCTGAATGTG
ENSMUSG00000043004	Gng2	14	19872559	19977627	ENSMUST00000160013.7	595	620	+	-2.42857	2.31e-05	0.108	AAAATAGAAAGAAATACATACATGTA
ENSMUSG00000043004	Gng2	14	19872559	19977627	ENSMUST00000160013.7	296	321	+	-7.47368	9.16e-05	0.177	TTATAAACAAAATAAACATTAAAGCC
ENSMUSG00000044067	Gpr22	12	31706867	31713947	ENSMUST00000057783.5	637	662	+	6.51128	1.49e-06	0.0692	CACAAAAATAGGGAAACTTTAAAATT
ENSMUSG00000044067	Gpr22	12	31706867	31713947	ENSMUST00000057783.5	295	320	+	-3.7218	3.51e-05	0.138	TTAAAAGAGTGTATAACTTTAAAATG
ENSMUSG00000068696	Gpr88	3	116249654	116253503	ENSMUST00000090473.6	1466	1491	+	-7.54887	9.3e-05	0.177	AAACAAAAACAAAAACACTGAAATCG
ENSMUSG00000068696	Gpr88	3	116249654	116253503	ENSMUST00000090473.6	1465	1490	+	7.66917	1.08e-06	0.0692	AAAACAAAAACAAAAACACTGAAATC
ENSMUSG00000020176	Grb10	11	11930508	12038683	ENSMUST00000093321.11	1082	1107	+	-6.09023	6.71e-05	0.168	GATAAAGAGAAGGAAACGCTGCAGAG
ENSMUSG00000020524	Gria1	11	57011387	57330244	ENSMUST00000036315.15	1249	1274	+	-6.39098	7.21e-05	0.172	ATCTTAAGAAAGAAAGAAAGAAAGAC
ENSMUSG00000020524	Gria1	11	57011387	57330244	ENSMUST00000036315.15	1258	1283	+	-2.61654	2.44e-05	0.111	AAGAAAGAAAGAAAGACAGCAAAGCC
ENSMUSG00000020524	Gria1	11	57011387	57330244	ENSMUST00000036315.15	1265	1290	+	-3.75188	3.54e-05	0.139	AAAGAAAGACAGCAAAGCCTGAATTC
ENSMUSG00000046182	Gsg1l	7	125878420	126082411	ENSMUST00000073935.6	2696	2721	+	-7.52632	9.27e-05	0.177	ATACTAAATAAATAGTCATGCAAGTG
ENSMUSG00000015501	Hivep2	10	13966075	14151374	ENSMUST00000191138.6	1333	1358	+	-1.7218	1.85e-05	0.0952	GAATGAAGAAGAGAAGCCTTCAAGAG
ENSMUSG00000028634	Hivep3	4	119733784	120138045	ENSMUST00000106307.8	1288	1313	+	-6.7218	7.71e-05	0.172	AAAAAAGGAAAGCAAGCCCCCTGCGG
ENSMUSG00000028634	Hivep3	4	119733784	120138045	ENSMUST00000106307.8	415	440	+	-7.78195	9.85e-05	0.177	AGAAAAGGGGAGAAAAACTGTAATTA
ENSMUSG00000028634	Hivep3	4	119733784	120138045	ENSMUST00000106307.8	3455	3480	+	-7.38346	8.99e-05	0.177	AAGAAAAAAAAAGAAATCTTACACAG
ENSMUSG00000028634	Hivep3	4	119733784	120138045	ENSMUST00000106307.8	3447	3472	+	-4.87218	4.96e-05	0.16	AAAGAAAAAAGAAAAAAAAAGAAATC
ENSMUSG00000028634	Hivep3	4	119733784	120138045	ENSMUST00000106307.8	3415	3440	+	-6.58647	7.52e-05	0.172	AACAAATAAAAAAAAAAACTCAAACA
ENSMUSG00000003949	Hlf	11	90336536	90390895	ENSMUST00000004051.7	1608	1633	+	-1.23308	1.62e-05	0.0909	GAGAAAAAAAGGAAAACTATTCCGTG
ENSMUSG00000003949	Hlf	11	90336536	90390895	ENSMUST00000004051.7	2776	2801	+	-0.894737	1.48e-05	0.0881	AAAACAAAACAAAAAACTCAAGAGTT
ENSMUSG00000003949	Hlf	11	90336536	90390895	ENSMUST00000004051.7	2774	2799	+	-2.86466	2.66e-05	0.117	ACAAAACAAAACAAAAAACTCAAGAG
ENSMUSG00000028572	Hook1	4	95967240	96025413	ENSMUST00000030306.13	2427	2452	+	-4.21805	4.08e-05	0.149	ATAAAGTTAAAAACAACCTTGAATTT
ENSMUSG00000028572	Hook1	4	95967240	96025413	ENSMUST00000030306.13	66	91	+	-4.6391	4.66e-05	0.156	AACAAAGGTTAAGATGCTTGGTAGCA
ENSMUSG00000059325	Hopx	5	77086988	77115121	ENSMUST00000081964.6	614	639	+	-2.69925	2.51e-05	0.113	AGCTAAGGAAAAAAAAAGTTACAGAG
ENSMUSG00000059325	Hopx	5	77086988	77115121	ENSMUST00000081964.6	155	180	+	-2.60902	2.44e-05	0.111	AACTAAAAAAAAAAAAATCCAAAATA
ENSMUSG00000046093	Hpcal4	4	123183227	123194701	ENSMUST00000059667.8	3485	3510	+	-6.69925	7.69e-05	0.172	CTTAAAGGAAGCAAAGAAGTCACGTG
ENSMUSG00000046607	Hrk	5	118164648	118189478	ENSMUST00000054836.6	2690	2715	+	-3.07519	2.86e-05	0.123	AAAAAAAGAAGAAAAAAAGAGAAAAA
ENSMUSG00000046607	Hrk	5	118164648	118189478	ENSMUST00000054836.6	2714	2739	+	-5.50376	5.87e-05	0.166	AAAAAAAAAAACCAACTTCCACAGTG
ENSMUSG00000078591	Hs3st4	7	123982869	124398989	ENSMUST00000106437.1	458	483	+	-0.586466	1.37e-05	0.088	AAGGAAGGAAGGAAGGAAGGAAGGTG
ENSMUSG00000078591	Hs3st4	7	123982869	124398989	ENSMUST00000106437.1	370	395	+	-7.09774	8.42e-05	0.177	AAGGAAGGAAGGAAGGAAGGAAGGAG
ENSMUSG00000078591	Hs3st4	7	123982869	124398989	ENSMUST00000106437.1	751	776	+	-4.54887	4.52e-05	0.155	ATAAAATAAAACAAAACAAAAAATAG
ENSMUSG00000025092	Hspa12a	19	58795750	58943654	ENSMUST00000066285.5	2084	2109	+	-6.83459	7.9e-05	0.174	AACAAGCGAATGGGAACCCCAAACTG
ENSMUSG00000020644	Id2	12	25093799	25097140	ENSMUST00000221761.1	296	321	+	0.195489	1.13e-05	0.0874	AAAAAAAAAAGAAAAAAATCACAAGG
ENSMUSG00000020644	Id2	12	25093799	25097140	ENSMUST00000221761.1	301	326	+	0.774436	9.67e-06	0.0833	AAAAAGAAAAAAATCACAAGGAATTG
ENSMUSG00000020644	Id2	12	25093799	25097140	ENSMUST00000221761.1	297	322	+	-6.69925	7.69e-05	0.172	AAAAAAAAAGAAAAAAATCACAAGGA
ENSMUSG00000021379	Id4	13	48261228	48266026	ENSMUST00000021810.2	1350	1375	+	-6.95489	8.14e-05	0.175	AAAAAAAAGAAAAAAAAAACATACTG
ENSMUSG00000021379	Id4	13	48261228	48266026	ENSMUST00000021810.2	1357	1382	+	-7.78195	9.85e-05	0.177	AGAAAAAAAAAACATACTGGAAAATC
ENSMUSG00000021379	Id4	13	48261228	48266026	ENSMUST00000021810.2	1352	1377	+	-5.58647	5.98e-05	0.166	AAAAAAGAAAAAAAAAACATACTGGA
ENSMUSG00000021379	Id4	13	48261228	48266026	ENSMUST00000021810.2	1351	1376	+	-4.90226	5e-05	0.16	AAAAAAAGAAAAAAAAAACATACTGG
ENSMUSG00000048583	Igf2	7	142650766	142666816	ENSMUST00000000033.11	896	921	+	-5.32331	5.56e-05	0.163	CATAATTGGATGAAAACATTGAAATG
ENSMUSG00000026185	Igfbp5	1	72857932	72874884	ENSMUST00000027377.8	4293	4318	+	15.9549	5.26e-08	0.0658	AAATAAAAAAGAAAAACCTGGAAGAT
ENSMUSG00000040612	Ildr2	1	166254139	166316823	ENSMUST00000111416.6	4701	4726	+	-6.1203	6.74e-05	0.168	ATAGAAAAAAAAAAAAGCCATCAGAG
ENSMUSG00000034336	Ina	19	47014698	47025327	ENSMUST00000037636.3	761	786	+	-1.00752	1.52e-05	0.0894	TAAATAAATAAATAAACATAAAAGGG
ENSMUSG00000034336	Ina	19	47014698	47025327	ENSMUST00000037636.3	699	724	+	6.12782	1.68e-06	0.0692	AAAAAAAAAAGAAAAAGATTAATGAT
ENSMUSG00000040797	Iqsec3	6	121372933	121473678	ENSMUST00000129815.7	2828	2853	+	-7.49624	9.21e-05	0.177	CCACAAGGAAAAGGAACCTAGAAGTA
ENSMUSG00000025764	Jade1	3	41555731	41616864	ENSMUST00000026865.14	982	1007	+	-6.55639	7.47e-05	0.172	TTAAAATATAGAAAGGCAATAAGTTG
ENSMUSG00000025764	Jade1	3	41555731	41616864	ENSMUST00000026865.14	2159	2184	+	1.90977	7.02e-06	0.0794	ACAAAAAAAAAAAAAGCCCACACGTT
ENSMUSG00000063646	Jakmip1	5	37028335	37150607	ENSMUST00000208852.1	1411	1436	+	-1.40602	1.71e-05	0.0939	AAACACAGCAGAATGGCTCAGAAGTG
ENSMUSG00000061751	Kalrn	16	33969073	34573532	ENSMUST00000114973.8	368	393	+	-6.95489	8.14e-05	0.175	AAAAAAAACAAAAACAAAAAAAAGTT
ENSMUSG00000061751	Kalrn	16	33969073	34573532	ENSMUST00000114973.8	3065	3090	+	-5.94737	6.48e-05	0.166	CAAACAAACAAACAAACATGGCAATG
ENSMUSG00000061751	Kalrn	16	33969073	34573532	ENSMUST00000114973.8	366	391	+	-4.44361	4.36e-05	0.152	ACAAAAAAAACAAAAACAAAAAAAAG
ENSMUSG00000035681	Kcnc2	10	112271121	112467024	ENSMUST00000218827.1	859	884	+	-6.19549	6.89e-05	0.17	ATAAAAAACAAACAAATGCTGTATTG
ENSMUSG00000060882	Kcnd2	6	21215503	21729805	ENSMUST00000081542.5	1549	1574	+	-5.89474	6.4e-05	0.166	TAAAAATAAAAAAAAAGTTTTATGTC
ENSMUSG00000053519	Kcnip1	11	33629339	33993152	ENSMUST00000101368.8	471	496	+	-4.52632	4.5e-05	0.155	AACACATGTAGAATAGGACTGAATTA
ENSMUSG00000026824	Kcnj3	2	55435970	55598145	ENSMUST00000112632.1	213	238	+	-7.84962	9.99e-05	0.177	AAAGAAAGACACAATTCTGTGGAGTG
ENSMUSG00000026824	Kcnj3	2	55435970	55598145	ENSMUST00000112632.1	2910	2935	+	-3.09774	2.89e-05	0.124	ATTAGAAAAATGAAAACAAGGTAGTA
ENSMUSG00000038026	Kcnj9	1	172320501	172329318	ENSMUST00000062387.7	2127	2152	+	-5.80451	6.28e-05	0.166	AGCAATGGAATGGAGACATTGAAGCT
ENSMUSG00000046523	Kctd4	14	75955009	75966206	ENSMUST00000050120.3	1651	1676	+	-5.30827	5.53e-05	0.163	CTAAAAGAAATAAATCCTTTAAAGGT
ENSMUSG00000046523	Kctd4	14	75955009	75966206	ENSMUST00000050120.3	1413	1438	+	-2.61654	2.44e-05	0.111	CAAAAAGAAAAAAAAAGGAGGCAGGG
ENSMUSG00000046523	Kctd4	14	75955009	75966206	ENSMUST00000050120.3	1844	1869	+	-7.61654	9.44e-05	0.177	AATTAAAAAAAAAAAACTGTACAATT
ENSMUSG00000046523	Kctd4	14	75955009	75966206	ENSMUST00000050120.3	1418	1443	+	-3.73684	3.52e-05	0.138	AGAAAAAAAAAGGAGGCAGGGAAGCA
ENSMUSG00000046523	Kctd4	14	75955009	75966206	ENSMUST00000050120.3	1650	1675	+	-7.18797	8.63e-05	0.177	ACTAAAAGAAATAAATCCTTTAAAGG
ENSMUSG00000021752	Kctd6	14	8214140	8223563	ENSMUST00000022272.13	329	354	+	2.36842	5.99e-06	0.0794	AAAAACAGGAATAAAAGATTAAAGAG
ENSMUSG00000022332	Khdrbs3	15	68928420	69101211	ENSMUST00000229234.1	1748	1773	+	7.07519	1.28e-06	0.0692	ACAAAAAAAAAAAATGCTTTGTATTG
ENSMUSG00000019966	Kitl	10	100015630	100100416	ENSMUST00000105283.8	2752	2777	+	-0.142857	1.22e-05	0.0874	TAAAAAAATGGAAACACATAAAAGTA
ENSMUSG00000019966	Kitl	10	100015630	100100416	ENSMUST00000105283.8	2702	2727	+	-0.43609	1.32e-05	0.088	AATAATAATAATAAAATCCTAAATTG
ENSMUSG00000019966	Kitl	10	100015630	100100416	ENSMUST00000105283.8	3215	3240	+	-4.41353	4.33e-05	0.152	ATAAAGCAAAGAAAAACAGCAAAAAG
ENSMUSG00000019966	Kitl	10	100015630	100100416	ENSMUST00000105283.8	3545	3570	+	-5.53383	5.9e-05	0.166	AACAACAACAAAAAAGAAATGTAGGG
ENSMUSG00000019966	Kitl	10	100015630	100100416	ENSMUST00000105283.8	2901	2926	+	3.97744	3.35e-06	0.0794	ATAAATGAATGGAAAAATCTGTTGTG
ENSMUSG00000019966	Kitl	10	100015630	100100416	ENSMUST00000105283.8	1192	1217	+	-7.71429	9.64e-05	0.177	ATAAAAAAAGAGAGAGCTTTATGTAG
ENSMUSG00000042155	Klhl23	2	69821944	69836651	ENSMUST00000053087.3	147	172	+	-2.66165	2.47e-05	0.111	GAATAACAAAAGAAAAATGTGATGTG
ENSMUSG00000027270	Lamp5	2	136052239	136069917	ENSMUST00000057503.6	698	723	+	4.15038	3.16e-06	0.0794	AAAAGAAAAAAAAAAGCACTATACTC
ENSMUSG00000033499	Larp4b	13	9093881	9174451	ENSMUST00000091829.3	2148	2173	+	-6.45865	7.33e-05	0.172	AAAAAAAAAAAAAAAAAAAAGAAAGA
ENSMUSG00000033499	Larp4b	13	9093881	9174451	ENSMUST00000091829.3	3013	3038	+	0.879699	9.44e-06	0.0833	AAAAAAAGAAAAAAAAAAGAAAAGAA
ENSMUSG00000033499	Larp4b	13	9093881	9174451	ENSMUST00000091829.3	3054	3079	+	6.58647	1.47e-06	0.0692	AAAAAGGAAAAAAAAGTCTTATATTG
ENSMUSG00000033499	Larp4b	13	9093881	9174451	ENSMUST00000091829.3	2149	2174	+	4.95489	2.38e-06	0.0776	AAAAAAAAAAAAAAAAAAAGAAAGAA
ENSMUSG00000033499	Larp4b	13	9093881	9174451	ENSMUST00000091829.3	2152	2177	+	-6.45865	7.33e-05	0.172	AAAAAAAAAAAAAAAAGAAAGAAAGA
ENSMUSG00000033499	Larp4b	13	9093881	9174451	ENSMUST00000091829.3	2161	2186	+	1.45113	7.98e-06	0.0794	AAAAAAAGAAAGAAAGAAAGAAGAAG
ENSMUSG00000033499	Larp4b	13	9093881	9174451	ENSMUST00000091829.3	3053	3078	+	1.78947	7.28e-06	0.0794	AAAAAAGGAAAAAAAAGTCTTATATT
ENSMUSG00000033499	Larp4b	13	9093881	9174451	ENSMUST00000091829.3	2145	2170	+	-6.84962	7.93e-05	0.174	ACAAAAAAAAAAAAAAAAAAAAAGAA
ENSMUSG00000033499	Larp4b	13	9093881	9174451	ENSMUST00000091829.3	3021	3046	+	0.609023	1.01e-05	0.0842	AAAAAAAAAAGAAAAGAAAAAAAGAC
ENSMUSG00000033499	Larp4b	13	9093881	9174451	ENSMUST00000091829.3	2157	2182	+	6.37594	1.55e-06	0.0692	AAAAAAAAAAAGAAAGAAAGAAAGAA
ENSMUSG00000033499	Larp4b	13	9093881	9174451	ENSMUST00000091829.3	3011	3036	+	-5.73684	6.19e-05	0.166	AAAAAAAAAGAAAAAAAAAAGAAAAG
ENSMUSG00000033499	Larp4b	13	9093881	9174451	ENSMUST00000091829.3	3044	3069	+	-7.84211	9.96e-05	0.177	GACAAAAAAAAAAAAGGAAAAAAAAG
ENSMUSG00000033499	Larp4b	13	9093881	9174451	ENSMUST00000091829.3	2153	2178	+	4.68421	2.61e-06	0.0794	AAAAAAAAAAAAAAAGAAAGAAAGAA
ENSMUSG00000033499	Larp4b	13	9093881	9174451	ENSMUST00000091829.3	3025	3050	+	-5.61654	6.04e-05	0.166	AAAAAAGAAAAGAAAAAAAGACAAAA
ENSMUSG00000033499	Larp4b	13	9093881	9174451	ENSMUST00000091829.3	2147	2172	+	-7.42857	9.08e-05	0.177	AAAAAAAAAAAAAAAAAAAAAGAAAG
ENSMUSG00000039706	Ldb2	5	44472132	44799680	ENSMUST00000199534.4	757	782	+	-4.87218	4.96e-05	0.16	AAAAAAGAAAAGAAAAGAAAAATATC
ENSMUSG00000042363	Lgalsl	11	20823576	20831056	ENSMUST00000047028.8	1973	1998	+	-5.00752	5.13e-05	0.16	TACGGGAGTATAAAAGATTGGAAGTG
ENSMUSG00000067242	Lgi1	19	38264536	38312214	ENSMUST00000198518.4	3579	3604	+	6.24812	1.61e-06	0.0692	CACAAAGGAAAGAAAGTCAGGGAGGG
ENSMUSG00000000247	Lhx2	2	38339281	38369733	ENSMUST00000000253.5	466	491	+	-5.61654	6.04e-05	0.166	AAAAAGGAAAAAAAAATAAGGAAAAA
ENSMUSG00000030226	Lmo3	6	138362918	138581968	ENSMUST00000162772.7	2006	2031	+	5.44361	2.05e-06	0.0711	AATACACAAAACAAAACCTGGAAGAG
ENSMUSG00000028266	Lmo4	3	144188530	144205220	ENSMUST00000120539.7	582	607	+	-7.09023	8.41e-05	0.177	TTAAAAAAAAAAAAAGAAAAGAAGAA
ENSMUSG00000028266	Lmo4	3	144188530	144205220	ENSMUST00000120539.7	587	612	+	-6.72932	7.72e-05	0.172	AAAAAAAAAAGAAAAGAAGAAAAAAA
ENSMUSG00000028266	Lmo4	3	144188530	144205220	ENSMUST00000120539.7	591	616	+	2.46617	5.81e-06	0.0794	AAAAAAGAAAAGAAGAAAAAAAAATG
ENSMUSG00000028266	Lmo4	3	144188530	144205220	ENSMUST00000120539.7	586	611	+	-0.691729	1.41e-05	0.088	AAAAAAAAAAAGAAAAGAAGAAAAAA
ENSMUSG00000033060	Lmo7	14	101729957	101934710	ENSMUST00000159258.7	381	406	+	-1.90226	1.95e-05	0.0968	AGAAGAAAAAGGAAGAGAGGGAAGAG
ENSMUSG00000048814	Lonrf2	1	38793645	38836711	ENSMUST00000147695.8	405	430	+	-7.74436	9.74e-05	0.177	ATATAAGCAAGCCAAAACTGGACTTG
ENSMUSG00000030029	Lrig1	6	94604529	94700158	ENSMUST00000101126.2	1153	1178	+	-2.18797	2.14e-05	0.104	TTGAAAACATGTAAAATATTGAAGTG
ENSMUSG00000063052	Lrrc40	3	158036662	158068487	ENSMUST00000150525.7	247	272	+	-4.93985	5.05e-05	0.16	ATAAGCAGAATGAAAAGATTAAAGCA
ENSMUSG00000001089	Luzp1	4	136469761	136554780	ENSMUST00000105849.8	2290	2315	+	-0.406015	1.31e-05	0.088	TTAAAAGGAAACAGACCCCTGTGGTG
ENSMUSG00000047557	Lxn	3	67457998	67463926	ENSMUST00000058981.2	148	173	+	-5.45113	5.77e-05	0.166	ATAAAGAATAGTACTACCTAAAAATG
ENSMUSG00000046573	Lyrm4	13	35978395	36117526	ENSMUST00000053265.7	613	638	+	-0.571429	1.37e-05	0.088	CCCAAGGAAAGCCATGCACTGAAGTG
ENSMUSG00000029910	Mad2l1	6	66535390	66547220	ENSMUST00000116605.7	1894	1919	+	-2.97744	2.77e-05	0.12	CTAAAAGAACTGAAAGGACAGAAATG
ENSMUSG00000029910	Mad2l1	6	66535390	66547220	ENSMUST00000116605.7	4077	4102	+	-6.12782	6.75e-05	0.168	AACAAAAAGAAAAAAAAAAAGAATTC
ENSMUSG00000029910	Mad2l1	6	66535390	66547220	ENSMUST00000116605.7	4074	4099	+	-5.73684	6.19e-05	0.166	AAAAACAAAAAGAAAAAAAAAAAGAA
ENSMUSG00000029910	Mad2l1	6	66535390	66547220	ENSMUST00000116605.7	2067	2092	+	-6.66917	7.65e-05	0.172	GACAAAAGCAGGGCAACCCTGTGGTT
ENSMUSG00000074622	Mafb	2	160363703	160367065	ENSMUST00000099126.4	1588	1613	+	-1.78195	1.88e-05	0.0952	GACAATAAAAAAAAAATACCAAAATG
ENSMUSG00000074622	Mafb	2	160363703	160367065	ENSMUST00000099126.4	913	938	+	-5.01504	5.14e-05	0.16	ATAAAAGAAAGAAAAAACCCACCAAG
ENSMUSG00000074622	Mafb	2	160363703	160367065	ENSMUST00000099126.4	457	482	+	-6.85714	7.93e-05	0.174	AGCTAAGGAAGGAAAAACAGACAGAT
ENSMUSG00000074622	Mafb	2	160363703	160367065	ENSMUST00000099126.4	1594	1619	+	-0.0676692	1.2e-05	0.0874	AAAAAAAAAATACCAAAATGAAAGCG
ENSMUSG00000030188	Magohb	6	131284388	131293244	ENSMUST00000173198.7	137	162	+	-0.533835	1.35e-05	0.088	AGAAAAACAAGGGAAGCTTAGATATG
ENSMUSG00000023050	Map3k12	15	102497646	102517064	ENSMUST00000023812.9	1051	1076	+	-6.66165	7.63e-05	0.172	AAAAAGGGAAGAAAGTCCATTAATTC
ENSMUSG00000023050	Map3k12	15	102497646	102517064	ENSMUST00000023812.9	1311	1336	+	-4.31579	4.19e-05	0.15	AAAACAAAAACCAAAAAACAAAAGGG
ENSMUSG00000023050	Map3k12	15	102497646	102517064	ENSMUST00000023812.9	1050	1075	+	-7.81955	9.92e-05	0.177	AAAAAAGGGAAGAAAGTCCATTAATT
ENSMUSG00000033900	Map9	3	82358044	82395268	ENSMUST00000091014.9	2410	2435	+	9.4812	5.74e-07	0.0692	ATAATAATAAACAAAACTCTGACGTG
ENSMUSG00000053137	Mapk11	15	89142486	89149628	ENSMUST00000088823.4	161	186	+	-0.736842	1.42e-05	0.088	CACACACAGAGGAATGCACGGATGTG
ENSMUSG00000024558	Mapk4	18	73928486	74065359	ENSMUST00000162863.7	1011	1036	+	-6.1203	6.74e-05	0.168	AAAGAAAGGTGGTGAGCACAGAAGGG
ENSMUSG00000022269	Marchf11	15	26309048	26409576	ENSMUST00000126304.1	775	800	+	0.0075188	1.18e-05	0.0874	AAAAAGGCAATGGAAAATTTGAAGAG
ENSMUSG00000036792	Mbd5	2	48949508	49325405	ENSMUST00000132717.5	1270	1295	+	-0.142857	1.22e-05	0.0874	TTAAAAAAAAAAAAAACTTAGATGAA
ENSMUSG00000051098	Mblac2	13	81711341	81753275	ENSMUST00000057598.6	161	186	+	-3.7218	3.51e-05	0.138	AAAAAAAAAAAAAAACCAACCCAGAG
ENSMUSG00000051098	Mblac2	13	81711341	81753275	ENSMUST00000057598.6	1623	1648	+	-7.77444	9.83e-05	0.177	TTAAATGTAAAGGATACAAGGAAGGG
ENSMUSG00000051098	Mblac2	13	81711341	81753275	ENSMUST00000057598.6	151	176	+	-6.45865	7.33e-05	0.172	AAAAAAAGAAAAAAAAAAAAAAAAAC
ENSMUSG00000051098	Mblac2	13	81711341	81753275	ENSMUST00000057598.6	159	184	+	-7.31579	8.88e-05	0.177	AAAAAAAAAAAAAAAAACCAACCCAG
ENSMUSG00000051098	Mblac2	13	81711341	81753275	ENSMUST00000057598.6	152	177	+	-6.45865	7.33e-05	0.172	AAAAAAGAAAAAAAAAAAAAAAAACC
ENSMUSG00000051098	Mblac2	13	81711341	81753275	ENSMUST00000057598.6	163	188	+	-7.42105	9.06e-05	0.177	AAAAAAAAAAAAACCAACCCAGAGTC
ENSMUSG00000009647	Mcu	10	59446984	59616692	ENSMUST00000161435.1	1355	1380	+	-6.06767	6.67e-05	0.168	AACATGGAACAAAAAGACTTACTGTG
ENSMUSG00000030621	Me3	7	89632392	89854359	ENSMUST00000159491.7	759	784	+	-4.21053	4.07e-05	0.149	CAAGAAAATAGAAAAGAGGGTAAGTG
ENSMUSG00000027080	Med19	2	84678402	84688215	ENSMUST00000102645.3	1248	1273	+	-5.90977	6.42e-05	0.166	CTAATCAGAATAAAAAAATTAAAGGG
ENSMUSG00000005583	Mef2c	13	83504034	83667080	ENSMUST00000197146.4	103	128	+	-6.84962	7.93e-05	0.174	GAAAAAAAAAAAAAAGTCAGGTACTC
ENSMUSG00000005583	Mef2c	13	83504034	83667080	ENSMUST00000197146.4	1831	1856	+	-6.38346	7.2e-05	0.172	AAAAAAAAAAAACAAACCTTTCTCTA
ENSMUSG00000005583	Mef2c	13	83504034	83667080	ENSMUST00000197146.4	4177	4202	+	-7.06767	8.38e-05	0.177	ATGACAATTAAAATAGCTTGTAAATG
ENSMUSG00000027210	Meis2	2	115863064	116065839	ENSMUST00000110907.7	470	495	+	-7.34586	8.92e-05	0.177	ACCAATGGGACAAGAACACAAATGTG
ENSMUSG00000048222	Mfap1b	2	121460235	121474067	ENSMUST00000056732.3	1349	1374	+	-6.10526	6.73e-05	0.168	GAAAAAAAAAAAAAGCCACAAGTGTG
ENSMUSG00000048222	Mfap1b	2	121460235	121474067	ENSMUST00000056732.3	640	665	+	-1.51128	1.76e-05	0.0951	CTCAAAAAGAAAAAAGAATTGTAGTA
ENSMUSG00000048222	Mfap1b	2	121460235	121474067	ENSMUST00000056732.3	936	961	+	-7.26316	8.75e-05	0.177	TAAAATAAAAAACAAACAGTAAAGCA
ENSMUSG00000048222	Mfap1b	2	121460235	121474067	ENSMUST00000056732.3	1347	1372	+	0.969925	9.24e-06	0.0833	GTGAAAAAAAAAAAAAGCCACAAGTG
ENSMUSG00000039478	Micu3	8	40307458	40386308	ENSMUST00000136835.1	1033	1058	+	-3.35338	3.11e-05	0.13	AAAAGAGAAAATAAAACTTTCTCTTG
ENSMUSG00000039478	Micu3	8	40307458	40386308	ENSMUST00000136835.1	1246	1271	+	-3.59398	3.35e-05	0.134	AAAAAGAAAGGGAAGGCAAGAGAGGG
ENSMUSG00000053192	Mllt11	3	95219135	95232171	ENSMUST00000065482.5	467	492	+	0.804511	9.6e-06	0.0833	CAAGAAGTAATGAGAACCTGGAAGTT
ENSMUSG00000052373	Mpp3	11	101999652	102028461	ENSMUST00000107167.1	1001	1026	+	-4.96241	5.07e-05	0.16	AAAAATAAATTAAAAAAATTTAAGGG
ENSMUSG00000037531	Mrpl47	3	32725397	32737605	ENSMUST00000043966.7	2109	2134	+	-5.2406	5.45e-05	0.163	AAAAAGAACCAGAAAAGATGTAATTG
ENSMUSG00000058267	Mrps14	1	160195215	160202170	ENSMUST00000135680.7	1972	1997	+	9.28571	6.21e-07	0.0692	AACAAACAAAAAAAAGCAATTGAGTG
ENSMUSG00000058267	Mrps14	1	160195215	160202170	ENSMUST00000135680.7	1806	1831	+	-0.729323	1.42e-05	0.088	AAAAAAAGCAATTGAGCCGGGCAGTG
ENSMUSG00000058267	Mrps14	1	160195215	160202170	ENSMUST00000135680.7	1578	1603	+	-7.30075	8.84e-05	0.177	AAAAAAAAACAAAAAACAAAAAAAAC
ENSMUSG00000014551	Mrps25	6	92169525	92184033	ENSMUST00000140438.1	4964	4989	+	-3.93233	3.78e-05	0.146	ATCAAGGGTGGAAAGCCCTGAAAGCT
ENSMUSG00000014551	Mrps25	6	92169525	92184033	ENSMUST00000140438.1	4963	4988	+	-5.14286	5.3e-05	0.16	AATCAAGGGTGGAAAGCCCTGAAAGC
ENSMUSG00000026273	Mterf4	1	93299211	93305915	ENSMUST00000112944.7	834	859	+	-0.917293	1.48e-05	0.0881	ATCAAAGTCAGGAGTGCTTGGTAGTA
ENSMUSG00000016510	Mtif3	5	146951573	146963800	ENSMUST00000066675.9	3536	3561	+	-6.94737	8.13e-05	0.175	GTAAGAAAAAAAAAAGCCCTCATGAC
ENSMUSG00000068566	Myadm	7	3289080	3300442	ENSMUST00000203566.2	1630	1655	+	-4.18045	4.04e-05	0.148	ACAAAAACAAAAAAAACCCTCAATAT
ENSMUSG00000068566	Myadm	7	3289080	3300442	ENSMUST00000203566.2	568	593	+	-1.64662	1.82e-05	0.0951	AACAAAGCAAACAAAATCCTGGAGGT
ENSMUSG00000038175	Mylip	13	45389742	45412022	ENSMUST00000038275.10	1434	1459	+	-7.72932	9.69e-05	0.177	TTTAAAAAAAAAAAAACTCTGTTATA
ENSMUSG00000038175	Mylip	13	45389742	45412022	ENSMUST00000038275.10	538	563	+	-5.86466	6.36e-05	0.166	ATTGAAAAAAAAAAAGCAATCCTGTG
ENSMUSG00000038175	Mylip	13	45389742	45412022	ENSMUST00000038275.10	128	153	+	3.76692	3.66e-06	0.0794	AAGGAGGAAAAGAAAACAAGAATGTG
ENSMUSG00000038175	Mylip	13	45389742	45412022	ENSMUST00000038275.10	542	567	+	-4.2782	4.16e-05	0.15	AAAAAAAAAAAGCAATCCTGTGACTT
ENSMUSG00000002728	Naa20	2	145902099	145916425	ENSMUST00000134759.2	445	470	+	-7.15038	8.54e-05	0.177	TAGAAAAGGAGGAAAAATGTCAAGTT
ENSMUSG00000027438	Napb	2	148693985	148732467	ENSMUST00000136513.1	2124	2149	+	-6.08271	6.7e-05	0.168	TTAAAAAGAAAAAAGGAAATGAAGCA
ENSMUSG00000027438	Napb	2	148693985	148732467	ENSMUST00000136513.1	3122	3147	+	6.25564	1.61e-06	0.0692	ACCAAAAAAAAAAAAGGACTGAAAGG
ENSMUSG00000027438	Napb	2	148693985	148732467	ENSMUST00000136513.1	3130	3155	+	-6.20301	6.9e-05	0.17	AAAAAAAGGACTGAAAGGCTGAGGTG
ENSMUSG00000027438	Napb	2	148693985	148732467	ENSMUST00000136513.1	2604	2629	+	-3.29323	3.06e-05	0.129	CTTAAAAATAAAAAAATTTAAAACTG
ENSMUSG00000027438	Napb	2	148693985	148732467	ENSMUST00000136513.1	3123	3148	+	-7.81955	9.92e-05	0.177	CCAAAAAAAAAAAAGGACTGAAAGGC
ENSMUSG00000027438	Napb	2	148693985	148732467	ENSMUST00000136513.1	2611	2636	+	-5.44361	5.75e-05	0.166	ATAAAAAAATTTAAAACTGTAATGTA
ENSMUSG00000027438	Napb	2	148693985	148732467	ENSMUST00000136513.1	3243	3268	+	-5.60902	6.02e-05	0.166	AAAAAAAAAAAAAATACAAAGAACAC
ENSMUSG00000027799	Nbea	3	55625195	56183701	ENSMUST00000029374.7	1678	1703	+	-4.83459	4.91e-05	0.16	AAAAAAGAAAAATAAAATATGCAAAG
ENSMUSG00000032475	Nck1	9	100492293	100546134	ENSMUST00000116522.7	2395	2420	+	-7.43609	9.09e-05	0.177	AACAACAACAAAAAAACCCTATAAAT
ENSMUSG00000024082	Ndufaf7	17	78937136	78948052	ENSMUST00000233068.1	487	512	+	-6.4812	7.37e-05	0.172	AGTCAAGAAAGGAATGCCTGCCAGTC
ENSMUSG00000040536	Necab1	4	14952245	15149794	ENSMUST00000041606.13	969	994	+	-3.98496	3.83e-05	0.146	AAGAAATTAAAACAAGCACAAAAGTT
ENSMUSG00000040536	Necab1	4	14952245	15149794	ENSMUST00000041606.13	3122	3147	+	5.51128	2e-06	0.0709	ATCAAAAGTAAAAATAAATTGAATCG
ENSMUSG00000024589	Nedd4l	18	64887705	65217828	ENSMUST00000163516.8	3630	3655	+	-5.62406	6.05e-05	0.166	AAAAAAAAAAGAAAAAACAAAAACAA
ENSMUSG00000024589	Nedd4l	18	64887705	65217828	ENSMUST00000163516.8	3629	3654	+	-0.56391	1.37e-05	0.088	AAAAAAAAAAAGAAAAAACAAAAACA
ENSMUSG00000024589	Nedd4l	18	64887705	65217828	ENSMUST00000163516.8	3643	3668	+	-0.616541	1.38e-05	0.088	AAAACAAAAACAAAAAACTTAAACTC
ENSMUSG00000024589	Nedd4l	18	64887705	65217828	ENSMUST00000163516.8	3637	3662	+	-5.84962	6.34e-05	0.166	AAAGAAAAAACAAAAACAAAAAACTT
ENSMUSG00000024589	Nedd4l	18	64887705	65217828	ENSMUST00000163516.8	2168	2193	+	-6.34586	7.15e-05	0.172	AACAAACAAACAAAAGATTAAAAATA
ENSMUSG00000040037	Negr1	3	156561794	157316445	ENSMUST00000074015.10	2649	2674	+	-4.71429	4.75e-05	0.158	AAAGAAAGAAGGAAAAAATGATGATA
ENSMUSG00000026749	Nek6	2	38511643	38594606	ENSMUST00000054234.9	7556	7581	+	-4.57143	4.55e-05	0.155	TCAAAAAGTACAAAGAATTTGAAATG
ENSMUSG00000055409	Nell1	7	49974864	50866608	ENSMUST00000081872.12	2648	2673	+	-5.42105	5.72e-05	0.165	AAAACAAAAACAAAAACATTGATCCA
ENSMUSG00000020982	Nemf	12	69310522	69357165	ENSMUST00000021368.9	434	459	+	-5.3985	5.69e-05	0.165	GCAAAAAAAAATAACACAAGAAAATG
ENSMUSG00000034701	Neurod1	2	79452521	79456751	ENSMUST00000041099.4	658	683	+	2.78195	5.25e-06	0.0794	AGAAAAGAAAAAAAACCAACAAATTG
ENSMUSG00000034701	Neurod1	2	79452521	79456751	ENSMUST00000041099.4	657	682	+	-2.74436	2.55e-05	0.114	AAGAAAAGAAAAAAAACCAACAAATT
ENSMUSG00000034701	Neurod1	2	79452521	79456751	ENSMUST00000041099.4	217	242	+	-7.3985	9.02e-05	0.177	TTTAAAAATAATAATACAGTAAAGTA
ENSMUSG00000034701	Neurod1	2	79452521	79456751	ENSMUST00000041099.4	648	673	+	-4.76692	4.83e-05	0.159	AAAAAAGAAAAGAAAAGAAAAAAAAC
ENSMUSG00000038255	Neurod2	11	98325415	98329648	ENSMUST00000041685.6	640	665	+	-6.58647	7.52e-05	0.172	CAAAAGGAAAAAAAAAAAAGAAAGAA
ENSMUSG00000038255	Neurod2	11	98325415	98329648	ENSMUST00000041685.6	652	677	+	8.06767	9.45e-07	0.0692	AAAAAAAGAAAGAAAGAAAGAAAAAG
ENSMUSG00000038255	Neurod2	11	98325415	98329648	ENSMUST00000041685.6	653	678	+	-4.04511	3.89e-05	0.146	AAAAAAGAAAGAAAGAAAGAAAAAGG
ENSMUSG00000038255	Neurod2	11	98325415	98329648	ENSMUST00000041685.6	644	669	+	-7.39098	9.01e-05	0.177	AGGAAAAAAAAAAAAGAAAGAAAGAA
ENSMUSG00000038255	Neurod2	11	98325415	98329648	ENSMUST00000041685.6	648	673	+	6.37594	1.55e-06	0.0692	AAAAAAAAAAAGAAAGAAAGAAAGAA
ENSMUSG00000008575	Nfib	4	82290173	82705750	ENSMUST00000107245.8	5763	5788	+	-4.54887	4.52e-05	0.155	CAAAAAACAAAAAAACCAGCAAAATG
ENSMUSG00000008575	Nfib	4	82290173	82705750	ENSMUST00000107245.8	5754	5779	+	-7.30075	8.84e-05	0.177	AAAAAAAAACAAAAAACAAAAAAACC
ENSMUSG00000008575	Nfib	4	82290173	82705750	ENSMUST00000107245.8	727	752	+	-4.70677	4.74e-05	0.158	AAAAAAGAGAAAAAAGAAAAATAGGG
ENSMUSG00000008575	Nfib	4	82290173	82705750	ENSMUST00000107245.8	717	742	+	-7.42857	9.08e-05	0.177	GAAAAAAAAAAAAAAAGAGAAAAAAG
ENSMUSG00000008575	Nfib	4	82290173	82705750	ENSMUST00000107245.8	719	744	+	-7.42857	9.08e-05	0.177	AAAAAAAAAAAAAAGAGAAAAAAGAA
ENSMUSG00000008575	Nfib	4	82290173	82705750	ENSMUST00000107245.8	780	805	+	-7.29323	8.83e-05	0.177	CTCTATGGAAGAAATGCCTCTATGTG
ENSMUSG00000008575	Nfib	4	82290173	82705750	ENSMUST00000107245.8	1528	1553	+	-7.31579	8.88e-05	0.177	AAAAAAAAAAACAAAAGACAAAAAAA
ENSMUSG00000008575	Nfib	4	82290173	82705750	ENSMUST00000107245.8	724	749	+	-6.56391	7.49e-05	0.172	AAAAAAAAAGAGAAAAAAGAAAAATA
ENSMUSG00000008575	Nfib	4	82290173	82705750	ENSMUST00000107245.8	710	735	+	3.29323	4.33e-06	0.0794	TAAAAAGGAAAAAAAAAAAAAAAGAG
ENSMUSG00000008575	Nfib	4	82290173	82705750	ENSMUST00000107245.8	1074	1099	+	-6.27068	7e-05	0.171	TAAAAAATAAAAAAAATATTGAAAAC
ENSMUSG00000008575	Nfib	4	82290173	82705750	ENSMUST00000107245.8	1075	1100	+	-7.65414	9.54e-05	0.177	AAAAAATAAAAAAAATATTGAAAACA
ENSMUSG00000008575	Nfib	4	82290173	82705750	ENSMUST00000107245.8	723	748	+	-7.30827	8.86e-05	0.177	AAAAAAAAAAGAGAAAAAAGAAAAAT
ENSMUSG00000008575	Nfib	4	82290173	82705750	ENSMUST00000107245.8	1541	1566	+	7.12782	1.26e-06	0.0692	AAAGACAAAAAAAAACCACAAAAGTG
ENSMUSG00000020248	Nfyb	10	82748701	82764144	ENSMUST00000130911.7	181	206	+	-7.01504	8.25e-05	0.176	TTTAAAAGAAAAAAAAATTGGATTTT
ENSMUSG00000021772	Nkiras1	14	18271136	18284003	ENSMUST00000132374.8	220	245	+	-6.84211	7.91e-05	0.174	ATAATAGCAAAATAAAATTTAGAGTA
ENSMUSG00000026575	Nme7	1	164304121	164437725	ENSMUST00000193808.5	300	325	+	-1.30827	1.66e-05	0.0924	GAGAAAGGAAAGAAGGAAAGGAAATG
ENSMUSG00000041923	Nol4	18	22693181	23041653	ENSMUST00000092015.10	1556	1581	+	-7.6015	9.4e-05	0.177	AACAAAAACAAAAAAAATTTGTGATA
ENSMUSG00000027133	Nop10	2	112261926	112263269	ENSMUST00000028553.3	440	465	+	-5.6015	6.01e-05	0.166	TCAAAGAGTAAAAAAAAATGTATGTG
ENSMUSG00000021047	Nova1	12	46694517	46818929	ENSMUST00000021438.7	490	515	+	-7.03008	8.29e-05	0.176	TAAAATGATCAAAAAGCAATATAGTT
ENSMUSG00000021047	Nova1	12	46694517	46818929	ENSMUST00000021438.7	3745	3770	+	14.3008	9.9e-08	0.0658	ATAAACAGTATGAAAGCATTAAATTG
ENSMUSG00000026241	Nppc	1	86666291	86670571	ENSMUST00000027449.5	442	467	+	-6.8797	7.98e-05	0.174	AATGAAAGAAGCCAACCATTGTAATG
ENSMUSG00000069171	Nr2f1	13	78188973	78199757	ENSMUST00000091458.12	271	296	+	-1.66165	1.82e-05	0.0951	AAAAAAAAAAAAAAAAAAAGAACGAT
ENSMUSG00000069171	Nr2f1	13	78188973	78199757	ENSMUST00000091458.12	275	300	+	-2.65414	2.46e-05	0.111	AAAAAAAAAAAAAAAGAACGATTTGG
ENSMUSG00000069171	Nr2f1	13	78188973	78199757	ENSMUST00000091458.12	280	305	+	8.27068	8.91e-07	0.0692	AAAAAAAAAAGAACGATTTGGAAGAG
ENSMUSG00000069171	Nr2f1	13	78188973	78199757	ENSMUST00000091458.12	274	299	+	0.774436	9.67e-06	0.0833	AAAAAAAAAAAAAAAAGAACGATTTG
ENSMUSG00000069171	Nr2f1	13	78188973	78199757	ENSMUST00000091458.12	279	304	+	-6.51128	7.41e-05	0.172	AAAAAAAAAAAGAACGATTTGGAAGA
ENSMUSG00000030551	Nr2f2	7	70351944	70366735	ENSMUST00000032768.14	206	231	+	3.91729	3.44e-06	0.0794	AAAAAAGAAAGAAAACAACTCCTGTG
ENSMUSG00000030551	Nr2f2	7	70351944	70366735	ENSMUST00000032768.14	566	591	+	-4.23308	4.1e-05	0.149	AAATAGCATAGGAAAACATAAAACTT
ENSMUSG00000030551	Nr2f2	7	70351944	70366735	ENSMUST00000032768.14	2118	2143	+	-3.50376	3.25e-05	0.133	GAGAGAATAAAGAAAACTTTACAGGG
ENSMUSG00000030551	Nr2f2	7	70351944	70366735	ENSMUST00000032768.14	1938	1963	+	-4.8797	4.97e-05	0.16	ACATAAAAAAAAAAAACCATGAACAT
ENSMUSG00000030551	Nr2f2	7	70351944	70366735	ENSMUST00000032768.14	573	598	+	-7.57895	9.35e-05	0.177	ATAGGAAAACATAAAACTTTAAAAGG
ENSMUSG00000030551	Nr2f2	7	70351944	70366735	ENSMUST00000032768.14	1939	1964	+	-7.78195	9.85e-05	0.177	CATAAAAAAAAAAAACCATGAACATT
ENSMUSG00000026826	Nr4a2	2	57106830	57124003	ENSMUST00000183542.7	951	976	+	-7.28571	8.81e-05	0.177	AAAAAAAAAAGAAAATAACTACATAA
ENSMUSG00000042834	Nrep	18	33437019	33464029	ENSMUST00000168890.1	1261	1286	+	-1.14286	1.58e-05	0.0905	ATAAACAAAAATAAAATCTGACAATG
ENSMUSG00000042834	Nrep	18	33437019	33464029	ENSMUST00000168890.1	1532	1557	+	-7.74436	9.74e-05	0.177	AAATAAAGCAAGGAAACGGTATTGTG
ENSMUSG00000053310	Nrgn	9	37544492	37552904	ENSMUST00000065668.11	402	427	+	-4.76692	4.83e-05	0.159	AAAAAAGAAAGAAAAAAAGAAAAAGA
ENSMUSG00000053310	Nrgn	9	37544492	37552904	ENSMUST00000065668.11	401	426	+	8.33835	8.73e-07	0.0692	AAAAAAAGAAAGAAAAAAAGAAAAAG
ENSMUSG00000053310	Nrgn	9	37544492	37552904	ENSMUST00000065668.11	415	440	+	-7.57895	9.35e-05	0.177	AAAAAGAAAAAGAAAGAAAGAAAAAA
ENSMUSG00000034825	Nrip3	7	109758055	109782025	ENSMUST00000041460.12	1192	1217	+	-7.68421	9.58e-05	0.177	AAGAGAAGAAAGAAACCACAGATAGG
ENSMUSG00000059361	Nrsn2	2	152368755	152376638	ENSMUST00000079278.4	358	383	+	-4.60902	4.6e-05	0.155	AAGAAAGGTAATAAAAATATAAATTC
ENSMUSG00000066392	Nrxn3	12	88722876	90334935	ENSMUST00000163134.7	1466	1491	+	-6.10526	6.73e-05	0.168	AAAAATAACAAAACAACAAAAAAGTA
ENSMUSG00000066392	Nrxn3	12	88722876	90334935	ENSMUST00000163134.7	452	477	+	-5.84962	6.34e-05	0.166	TAAAAAAAAACAAAAACAAAAAAATA
ENSMUSG00000066392	Nrxn3	12	88722876	90334935	ENSMUST00000163134.7	1478	1503	+	8.28571	8.87e-07	0.0692	ACAACAAAAAAGTAAACCTTAAAATG
ENSMUSG00000066392	Nrxn3	12	88722876	90334935	ENSMUST00000163134.7	1039	1064	+	-6.14286	6.77e-05	0.168	AAGAAAAAAAAAAACCCACAAAAAAG
ENSMUSG00000066392	Nrxn3	12	88722876	90334935	ENSMUST00000163134.7	514	539	+	-5.6015	6.01e-05	0.166	AAAACAAAACAAGAAACCCAGAAATA
ENSMUSG00000066392	Nrxn3	12	88722876	90334935	ENSMUST00000163134.7	1752	1777	+	-5.3985	5.69e-05	0.165	AAAAAAAAAAACAAACAAACAAACTG
ENSMUSG00000034187	Nsf	11	103821782	103954056	ENSMUST00000103075.10	1416	1441	+	-6.21805	6.93e-05	0.17	GCAAATTGAAGGAATGCAATAAAGAG
ENSMUSG00000020297	Nsg2	11	32000463	32059202	ENSMUST00000020537.8	1537	1562	+	2.81955	5.19e-06	0.0794	AGGAAAAAAAAATAAACATAGATGTG
ENSMUSG00000054027	Nt5dc3	10	86779005	86838389	ENSMUST00000099396.2	2221	2246	+	-5.81203	6.29e-05	0.166	GAAAAAAAAAATCAAACTGTAAACCG
ENSMUSG00000059974	Ntm	9	28994750	29963141	ENSMUST00000075069.10	527	552	+	-3.59398	3.35e-05	0.134	GAAAAGAAAAGAAAAGAAGAGAAGAG
ENSMUSG00000059974	Ntm	9	28994750	29963141	ENSMUST00000075069.10	522	547	+	-3.59398	3.35e-05	0.134	CAAAAGAAAAGAAAAGAAAAGAAGAG
ENSMUSG00000090061	Nwd2	5	63649102	63810546	ENSMUST00000159584.2	1969	1994	+	0.894737	9.41e-06	0.0833	AAAGAAAAAAAAAAAAACCTCTAGAG
ENSMUSG00000090061	Nwd2	5	63649102	63810546	ENSMUST00000159584.2	1971	1996	+	13.5338	1.27e-07	0.0658	AGAAAAAAAAAAAAACCTCTAGAGTG
ENSMUSG00000090061	Nwd2	5	63649102	63810546	ENSMUST00000159584.2	1236	1261	+	-5.09774	5.25e-05	0.16	AAAAAAAAAAAGACTTCATCAATTTG
ENSMUSG00000090061	Nwd2	5	63649102	63810546	ENSMUST00000159584.2	44	69	+	1.35338	8.24e-06	0.0802	GACAGAAGAAAAAAAAAAGCAAAGTG
ENSMUSG00000090061	Nwd2	5	63649102	63810546	ENSMUST00000159584.2	1232	1257	+	-7.3985	9.02e-05	0.177	AAAAAAAAAAAAAAAGACTTCATCAA
ENSMUSG00000045348	Nyap1	5	137729899	137741607	ENSMUST00000118326.7	718	743	+	-5.58647	5.98e-05	0.166	AAAAAAAAAAAAAAAAAGCTGTCAGG
ENSMUSG00000045348	Nyap1	5	137729899	137741607	ENSMUST00000118326.7	719	744	+	0.0451128	1.17e-05	0.0874	AAAAAAAAAAAAAAAAGCTGTCAGGA
ENSMUSG00000045348	Nyap1	5	137729899	137741607	ENSMUST00000118326.7	720	745	+	0.533835	1.03e-05	0.0846	AAAAAAAAAAAAAAAGCTGTCAGGAA
ENSMUSG00000029153	Ociad2	5	73322199	73341028	ENSMUST00000200776.3	745	770	+	-7.02256	8.27e-05	0.176	ATAAAAAAAAGACAACTTCTTAACTT
ENSMUSG00000029153	Ociad2	5	73322199	73341028	ENSMUST00000200776.3	822	847	+	-4.50376	4.46e-05	0.154	TAAAAAAATGAGAAACCCTGGGGCTG
ENSMUSG00000026158	Ogfrl1	1	23366424	23397772	ENSMUST00000027343.5	2508	2533	+	-6.75188	7.76e-05	0.172	AAAATAGTGAAGAACAAGTTGAAGTA
ENSMUSG00000026158	Ogfrl1	1	23366424	23397772	ENSMUST00000027343.5	37	62	+	-0.255639	1.25e-05	0.0875	AAAAAAAAAAAAACTGCTTTCTAATG
ENSMUSG00000026158	Ogfrl1	1	23366424	23397772	ENSMUST00000027343.5	27	52	+	5.69925	1.89e-06	0.0692	AAAAAAAAAAAAAAAAAAAAAAACTG
ENSMUSG00000026158	Ogfrl1	1	23366424	23397772	ENSMUST00000027343.5	32	57	+	-1.35338	1.68e-05	0.0932	AAAAAAAAAAAAAAAAAACTGCTTTC
ENSMUSG00000026761	Orc4	2	48902824	48950277	ENSMUST00000028098.10	931	956	+	-7.15789	8.56e-05	0.177	ATCACAGTATGGGAATGACTGATGTG
ENSMUSG00000026761	Orc4	2	48902824	48950277	ENSMUST00000028098.10	1285	1310	+	-7.2406	8.71e-05	0.177	ATACATTATTAGATAATTCTAAAGTG
ENSMUSG00000025353	Ormdl2	10	128817902	128821645	ENSMUST00000026409.4	530	555	+	9.42105	5.91e-07	0.0692	AAATAAGAAAAAAGAGCTCACAAGTG
ENSMUSG00000020189	Osbpl8	10	111164752	111297249	ENSMUST00000105275.8	1292	1317	+	-1.78947	1.88e-05	0.0952	CTACAAGGAAAGCTAACTCTGCTGTG
ENSMUSG00000020189	Osbpl8	10	111164752	111297249	ENSMUST00000105275.8	904	929	+	-2.49624	2.35e-05	0.11	AAAGGTGGTAAGAACAGATTGCAGTG
ENSMUSG00000028559	Osbpl9	4	109061145	109202272	ENSMUST00000159545.7	1766	1791	+	1.08271	8.96e-06	0.0833	AGCAACGGAAGCAAAGCACAGACTTG
ENSMUSG00000042616	Oscp1	4	126058565	126092195	ENSMUST00000035497.4	1132	1157	+	1.45113	7.98e-06	0.0794	AAAGAAAGAAAGAAAGAAAGAAAGAA
ENSMUSG00000042616	Oscp1	4	126058565	126092195	ENSMUST00000035497.4	1063	1088	+	-3.47368	3.22e-05	0.133	GAACAAAGAAAGAAAGGAAGGAAGGA
ENSMUSG00000042616	Oscp1	4	126058565	126092195	ENSMUST00000035497.4	1116	1141	+	1.45113	7.98e-06	0.0794	AAAGAAAGAAAGAAAGAAAGAAAGAA
ENSMUSG00000042616	Oscp1	4	126058565	126092195	ENSMUST00000035497.4	1072	1097	+	-7.81955	9.92e-05	0.177	AAGAAAGGAAGGAAGGAAGGAAGGAA
ENSMUSG00000042616	Oscp1	4	126058565	126092195	ENSMUST00000035497.4	430	455	+	-5.79699	6.27e-05	0.166	AACAAAACAAAAAAAAGTTTGGGGAC
ENSMUSG00000042616	Oscp1	4	126058565	126092195	ENSMUST00000035497.4	1067	1092	+	-3.47368	3.22e-05	0.133	AAAGAAAGAAAGGAAGGAAGGAAGGA
ENSMUSG00000042616	Oscp1	4	126058565	126092195	ENSMUST00000035497.4	1108	1133	+	-4.58647	4.56e-05	0.155	AAGGAAAGAAAGAAAGAAAGAAAGAA
ENSMUSG00000042616	Oscp1	4	126058565	126092195	ENSMUST00000035497.4	1096	1121	+	-7.81955	9.92e-05	0.177	AAGGAAGGAAGGAAGGAAAGAAAGAA
ENSMUSG00000042616	Oscp1	4	126058565	126092195	ENSMUST00000035497.4	1104	1129	+	-2.89474	2.68e-05	0.117	AAGGAAGGAAAGAAAGAAAGAAAGAA
ENSMUSG00000042616	Oscp1	4	126058565	126092195	ENSMUST00000035497.4	1092	1117	+	-7.81955	9.92e-05	0.177	AAGGAAGGAAGGAAGGAAGGAAAGAA
ENSMUSG00000042616	Oscp1	4	126058565	126092195	ENSMUST00000035497.4	1128	1153	+	1.45113	7.98e-06	0.0794	AAAGAAAGAAAGAAAGAAAGAAAGAA
ENSMUSG00000042616	Oscp1	4	126058565	126092195	ENSMUST00000035497.4	1124	1149	+	1.45113	7.98e-06	0.0794	AAAGAAAGAAAGAAAGAAAGAAAGAA
ENSMUSG00000042616	Oscp1	4	126058565	126092195	ENSMUST00000035497.4	1112	1137	+	1.45113	7.98e-06	0.0794	AAAGAAAGAAAGAAAGAAAGAAAGAA
ENSMUSG00000042616	Oscp1	4	126058565	126092195	ENSMUST00000035497.4	1100	1125	+	-1.20301	1.6e-05	0.0905	AAGGAAGGAAGGAAAGAAAGAAAGAA
ENSMUSG00000042616	Oscp1	4	126058565	126092195	ENSMUST00000035497.4	1160	1185	+	-7.49624	9.21e-05	0.177	AAAACAAATAAACAAACCTGGGGCTA
ENSMUSG00000042616	Oscp1	4	126058565	126092195	ENSMUST00000035497.4	1059	1084	+	-3.60902	3.36e-05	0.134	AAAAGAACAAAGAAAGAAAGGAAGGA
ENSMUSG00000042616	Oscp1	4	126058565	126092195	ENSMUST00000035497.4	1136	1161	+	1.45113	7.98e-06	0.0794	AAAGAAAGAAAGAAAGAAAGAAAGAA
ENSMUSG00000042616	Oscp1	4	126058565	126092195	ENSMUST00000035497.4	1120	1145	+	1.45113	7.98e-06	0.0794	AAAGAAAGAAAGAAAGAAAGAAAGAA
ENSMUSG00000042616	Oscp1	4	126058565	126092195	ENSMUST00000035497.4	1140	1165	+	-5.88722	6.39e-05	0.166	AAAGAAAGAAAGAAAGAAAGAAAACA
ENSMUSG00000042616	Oscp1	4	126058565	126092195	ENSMUST00000035497.4	1064	1089	+	-5.30827	5.53e-05	0.163	AACAAAGAAAGAAAGGAAGGAAGGAA
ENSMUSG00000040276	Pacsin1	17	27655509	27711482	ENSMUST00000232437.1	133	158	+	3.18797	4.49e-06	0.0794	AAAAAAAAAAGAAGAAATACGAAGAG
ENSMUSG00000040276	Pacsin1	17	27655509	27711482	ENSMUST00000232437.1	128	153	+	-7.69925	9.61e-05	0.177	AAAAAAAAAAAAAAAGAAGAAATACG
ENSMUSG00000074923	Pak6	2	118663303	118698020	ENSMUST00000099557.9	1309	1334	+	-7.6391	9.5e-05	0.177	CAAAAAAAAAAAAAAATTGCAAGGTC
ENSMUSG00000074923	Pak6	2	118663303	118698020	ENSMUST00000099557.9	1307	1332	+	-6.66917	7.65e-05	0.172	GGCAAAAAAAAAAAAAAATTGCAAGG
ENSMUSG00000074923	Pak6	2	118663303	118698020	ENSMUST00000099557.9	1308	1333	+	-6.93233	8.1e-05	0.175	GCAAAAAAAAAAAAAAATTGCAAGGT
ENSMUSG00000038729	Pakap	4	57717657	57896984	ENSMUST00000102902.3	252	277	+	-5.42105	5.72e-05	0.165	AAACAAAAAAACAAAGAAGCAAAGCG
ENSMUSG00000038729	Pakap	4	57717657	57896984	ENSMUST00000102902.3	247	272	+	-3.72932	3.52e-05	0.138	AATAAAAACAAAAAAACAAAGAAGCA
ENSMUSG00000038729	Pakap	4	57717657	57896984	ENSMUST00000102902.3	1246	1271	+	-2.17293	2.14e-05	0.104	GGACAAAGAAAGAAAGGAAGGAAGGG
ENSMUSG00000038729	Pakap	4	57717657	57896984	ENSMUST00000102902.3	1247	1272	+	-4.58647	4.56e-05	0.155	GACAAAGAAAGAAAGGAAGGAAGGGG
ENSMUSG00000030770	Parva	7	112427505	112591692	ENSMUST00000139720.7	3354	3379	+	2.88722	5.03e-06	0.0794	AAAACTGAAAGAATAACCTTAAAAAG
ENSMUSG00000104252	Pcdha4	18	36952648	37187661	ENSMUST00000192512.5	2004	2029	+	-7.6391	9.5e-05	0.177	ATCTCAAAAAAAAAAAACCTGTCTTG
ENSMUSG00000104252	Pcdha4	18	36952648	37187661	ENSMUST00000192512.5	903	928	+	-7.41353	9.05e-05	0.177	AAAAAGAAAAGAGAAAGTCGATAGCT
ENSMUSG00000040618	Pck2	14	55540266	55551242	ENSMUST00000226519.1	941	966	+	-0.360902	1.29e-05	0.088	TTAAAAAGAAAATAAGATTTGCAGTT
ENSMUSG00000061601	Pclo	5	14514918	14863459	ENSMUST00000030691.16	1306	1331	+	-7.53383	9.28e-05	0.177	CAAAAAAAAAAAAAAAAAAAAAGGTC
ENSMUSG00000061601	Pclo	5	14514918	14863459	ENSMUST00000030691.16	1312	1337	+	-0.0451128	1.19e-05	0.0874	AAAAAAAAAAAAAAAAGGTCAATGTT
ENSMUSG00000061601	Pclo	5	14514918	14863459	ENSMUST00000030691.16	1303	1328	+	-7.57143	9.34e-05	0.177	AACCAAAAAAAAAAAAAAAAAAAAAG
ENSMUSG00000061601	Pclo	5	14514918	14863459	ENSMUST00000030691.16	1304	1329	+	-6.99248	8.19e-05	0.176	ACCAAAAAAAAAAAAAAAAAAAAAGG
ENSMUSG00000061601	Pclo	5	14514918	14863459	ENSMUST00000030691.16	367	392	+	-7.75188	9.76e-05	0.177	TTTGAAAAAAAAAAAAAACTGATGTA
ENSMUSG00000061601	Pclo	5	14514918	14863459	ENSMUST00000030691.16	1310	1335	+	-0.210526	1.24e-05	0.0874	AAAAAAAAAAAAAAAAAAGGTCAATG
ENSMUSG00000038370	Pcp4l1	1	171173262	171196268	ENSMUST00000111332.1	1079	1104	+	1.69925	7.47e-06	0.0794	ATGACAATAAAAAAAGCCCTCAAATG
ENSMUSG00000059173	Pde1a	2	79834453	80129458	ENSMUST00000102655.9	459	484	+	-7.66165	9.55e-05	0.177	AACAAAATGATGAAAACCCTGTTTTC
ENSMUSG00000032177	Pde4a	9	21165714	21213248	ENSMUST00000039413.14	84	109	+	1.84211	7.19e-06	0.0794	CTGAGAAAAAAGAAAACAGAAAAGTG
ENSMUSG00000032177	Pde4a	9	21165714	21213248	ENSMUST00000039413.14	265	290	+	2.07519	6.66e-06	0.0794	ACAAAAAGAAAAAAAAAAAAAGAGTG
ENSMUSG00000032177	Pde4a	9	21165714	21213248	ENSMUST00000039413.14	271	296	+	-7.81955	9.92e-05	0.177	AGAAAAAAAAAAAAAGAGTGAAACAC
ENSMUSG00000032177	Pde4a	9	21165714	21213248	ENSMUST00000039413.14	270	295	+	-6.56391	7.49e-05	0.172	AAGAAAAAAAAAAAAAGAGTGAAACA
ENSMUSG00000021684	Pde8b	13	95024454	95250336	ENSMUST00000162670.7	402	427	+	-7.78195	9.85e-05	0.177	GACACGAGAAGCAAAGGCCTGTTGTG
ENSMUSG00000021684	Pde8b	13	95024454	95250336	ENSMUST00000162670.7	561	586	+	-7.82707	9.93e-05	0.177	ATGTGAGGAAGGAGCTCATTAAAATG
ENSMUSG00000049225	Pdp1	4	11958184	11966452	ENSMUST00000108297.2	554	579	+	-7.6391	9.5e-05	0.177	TTCCTAAAAGGAAAAATCCTAAACTG
ENSMUSG00000038240	Pdss2	10	43221486	43464882	ENSMUST00000160823.7	1163	1188	+	-7.61654	9.44e-05	0.177	GAAAAAAAAAAAGAAGTATTTGAATG
ENSMUSG00000038240	Pdss2	10	43221486	43464882	ENSMUST00000160823.7	1165	1190	+	-7.37594	8.98e-05	0.177	AAAAAAAAAAGAAGTATTTGAATGAC
ENSMUSG00000038240	Pdss2	10	43221486	43464882	ENSMUST00000160823.7	1329	1354	+	-2.39098	2.29e-05	0.107	ACCACAGAAAACTAGGCATGGTAGTG
ENSMUSG00000038240	Pdss2	10	43221486	43464882	ENSMUST00000160823.7	1164	1189	+	-5.66165	6.09e-05	0.166	AAAAAAAAAAAGAAGTATTTGAATGA
ENSMUSG00000038240	Pdss2	10	43221486	43464882	ENSMUST00000160823.7	2075	2100	+	-1.15789	1.59e-05	0.0905	TTCCCAGAAAGGAAAGCCATGAAAAG
ENSMUSG00000030887	Pdzd9	7	120658731	120670343	ENSMUST00000033178.3	374	399	+	-6.44361	7.3e-05	0.172	AAACAAGCAAGGAAGAGACAGAAGGA
ENSMUSG00000002265	Peg3	7	6703892	6730431	ENSMUST00000051209.10	2565	2590	+	-7.20301	8.66e-05	0.177	AACACTTGGAAAATAACAGAGAAGTG
ENSMUSG00000002265	Peg3	7	6703892	6730431	ENSMUST00000051209.10	835	860	+	-2.76692	2.56e-05	0.114	AAAAAAAAAATGTTACATTTGAGGTG
ENSMUSG00000002265	Peg3	7	6703892	6730431	ENSMUST00000051209.10	1009	1034	+	-5.74436	6.2e-05	0.166	ATGAAAGGTTGGGAACCACAGGAGAG
ENSMUSG00000050751	Pgbd5	8	124369049	124439658	ENSMUST00000052580.9	1404	1429	+	-0.18797	1.23e-05	0.0874	AACAAGAAAAATAAAAAATAAAAGTC
ENSMUSG00000030729	Pgm2l1	7	100227394	100278868	ENSMUST00000084935.10	3146	3171	+	-1.6391	1.81e-05	0.0951	AAAAAAAAAAAAAAAAAAAAAAACTA
ENSMUSG00000030729	Pgm2l1	7	100227394	100278868	ENSMUST00000084935.10	3153	3178	+	6.54887	1.48e-06	0.0692	AAAAAAAAAAAAAAAACTAAAAATGG
ENSMUSG00000030729	Pgm2l1	7	100227394	100278868	ENSMUST00000084935.10	5390	5415	+	-7.00752	8.22e-05	0.176	TTAAAAGATAATAAAACAGTAATTTT
ENSMUSG00000030729	Pgm2l1	7	100227394	100278868	ENSMUST00000084935.10	3152	3177	+	12.4662	1.76e-07	0.0658	AAAAAAAAAAAAAAAAACTAAAAATG
ENSMUSG00000030729	Pgm2l1	7	100227394	100278868	ENSMUST00000084935.10	3151	3176	+	3.67669	3.79e-06	0.0794	AAAAAAAAAAAAAAAAAACTAAAAAT
ENSMUSG00000030729	Pgm2l1	7	100227394	100278868	ENSMUST00000084935.10	3189	3214	+	4.29323	3.02e-06	0.0794	AAACACAAAAAGAAGACCTAGAAGGG
ENSMUSG00000030729	Pgm2l1	7	100227394	100278868	ENSMUST00000084935.10	2632	2657	+	-7.28571	8.81e-05	0.177	ATGAAGCGAAGTCAAATCATAAAGTG
ENSMUSG00000036062	Phf24	4	42916660	42944752	ENSMUST00000069184.8	355	380	+	-7.60902	9.42e-05	0.177	GAAAAAGGACCAAAAGCCTTTTGTTG
ENSMUSG00000036062	Phf24	4	42916660	42944752	ENSMUST00000069184.8	3142	3167	+	-2.67669	2.49e-05	0.112	AAAACAGAAAGCACAGAATTCAACTG
ENSMUSG00000040430	Pitpnc1	11	107207892	107470699	ENSMUST00000103064.9	537	562	+	0.037594	1.17e-05	0.0874	AAACAAAAAAAAAAAACAAAAAAACG
ENSMUSG00000040430	Pitpnc1	11	107207892	107470699	ENSMUST00000103064.9	3763	3788	+	-5.35338	5.63e-05	0.165	TACAAATAAATAAAAATTTAAAAGTA
ENSMUSG00000040430	Pitpnc1	11	107207892	107470699	ENSMUST00000103064.9	3121	3146	+	-7.54887	9.3e-05	0.177	GAAGAAAAAAAAAAAAGCAGAACTTG
ENSMUSG00000040430	Pitpnc1	11	107207892	107470699	ENSMUST00000103064.9	966	991	+	7.31579	1.19e-06	0.0692	AAAAGAAAAAAAAATACTCTCAGGTG
ENSMUSG00000040430	Pitpnc1	11	107207892	107470699	ENSMUST00000103064.9	543	568	+	5.78947	1.84e-06	0.0692	AAAAAAAAAACAAAAAAACGAAAGGA
ENSMUSG00000040430	Pitpnc1	11	107207892	107470699	ENSMUST00000103064.9	964	989	+	-5.58647	5.98e-05	0.166	AAAAAAGAAAAAAAAATACTCTCAGG
ENSMUSG00000040430	Pitpnc1	11	107207892	107470699	ENSMUST00000103064.9	959	984	+	-6.56391	7.49e-05	0.172	AAAAAAAAAAAGAAAAAAAAATACTC
ENSMUSG00000040430	Pitpnc1	11	107207892	107470699	ENSMUST00000103064.9	3127	3152	+	-5.69173	6.13e-05	0.166	AAAAAAAAAAGCAGAACTTGAATTGC
ENSMUSG00000040430	Pitpnc1	11	107207892	107470699	ENSMUST00000103064.9	3126	3151	+	8.54887	8.16e-07	0.0692	AAAAAAAAAAAGCAGAACTTGAATTG
ENSMUSG00000040430	Pitpnc1	11	107207892	107470699	ENSMUST00000103064.9	542	567	+	-4.18045	4.04e-05	0.148	AAAAAAAAAAACAAAAAAACGAAAGG
ENSMUSG00000029406	Pitpnm2	5	124118690	124249760	ENSMUST00000086123.10	2123	2148	+	-4.59398	4.57e-05	0.155	AAAATACCAAAAAAATGTTTACAGTG
ENSMUSG00000019876	Pkib	10	57631981	57741112	ENSMUST00000075992.11	1548	1573	+	-4.35338	4.24e-05	0.15	ATAAAGGGAGGATACAATTGAAAGGG
ENSMUSG00000019817	Plagl1	10	13060504	13131694	ENSMUST00000121646.7	797	822	+	-4.7594	4.82e-05	0.159	ATTGAAAGAAGAATCAATCAAAAGTG
ENSMUSG00000026173	Plcd4	1	74542888	74567794	ENSMUST00000141412.7	1283	1308	+	-7.41353	9.05e-05	0.177	AGCAAGGGAAGAAAGAGCCTGCACAG
ENSMUSG00000026173	Plcd4	1	74542888	74567794	ENSMUST00000141412.7	1349	1374	+	-5.28571	5.5e-05	0.163	GACAAAGGACAGAGGCCCAGGAAGAG
ENSMUSG00000087141	Plcxd2	16	45959263	46010218	ENSMUST00000130481.1	4562	4587	+	-6.56391	7.49e-05	0.172	AAAAAAAAAAAGGAAAAAAAAAACTA
ENSMUSG00000087141	Plcxd2	16	45959263	46010218	ENSMUST00000130481.1	4567	4592	+	-6.17293	6.83e-05	0.169	AAAAAAGGAAAAAAAAAACTATGTCT
ENSMUSG00000030231	Plekha5	6	140424054	140597110	ENSMUST00000087622.5	2019	2044	+	-2.39098	2.29e-05	0.107	AAAAAAAAAAAAAAGAATTTACGGTA
ENSMUSG00000030231	Plekha5	6	140424054	140597110	ENSMUST00000087622.5	1262	1287	+	-2.61654	2.44e-05	0.111	AAAAAAAAAAGGAATGACCAGTTGTC
ENSMUSG00000030231	Plekha5	6	140424054	140597110	ENSMUST00000087622.5	2022	2047	+	-5.03759	5.16e-05	0.16	AAAAAAAAAAAGAATTTACGGTACAG
ENSMUSG00000030231	Plekha5	6	140424054	140597110	ENSMUST00000087622.5	2017	2042	+	-6.55639	7.47e-05	0.172	AAAAAAAAAAAAAAAAGAATTTACGG
ENSMUSG00000030231	Plekha5	6	140424054	140597110	ENSMUST00000087622.5	2018	2043	+	-0.894737	1.48e-05	0.0881	AAAAAAAAAAAAAAAGAATTTACGGT
ENSMUSG00000030231	Plekha5	6	140424054	140597110	ENSMUST00000087622.5	1257	1282	+	-6.69173	7.68e-05	0.172	GAAAAAAAAAAAAAAGGAATGACCAG
ENSMUSG00000044667	Plppr4	3	117319139	117360876	ENSMUST00000061071.12	795	820	+	-5.16541	5.32e-05	0.16	AAAGAAAGAAAGAAAGAAAGAATTGG
ENSMUSG00000044667	Plppr4	3	117319139	117360876	ENSMUST00000061071.12	743	768	+	1.45113	7.98e-06	0.0794	AAAGAAAGAAAGAAAGAAAGAAAGAA
ENSMUSG00000044667	Plppr4	3	117319139	117360876	ENSMUST00000061071.12	739	764	+	-4.58647	4.56e-05	0.155	AGAGAAAGAAAGAAAGAAAGAAAGAA
ENSMUSG00000044667	Plppr4	3	117319139	117360876	ENSMUST00000061071.12	701	726	+	1.33083	8.29e-06	0.0802	AAGAAAAGAAAAAGAAAAAGAAAGAG
ENSMUSG00000044667	Plppr4	3	117319139	117360876	ENSMUST00000061071.12	779	804	+	1.45113	7.98e-06	0.0794	AAAGAAAGAAAGAAAGAAAGAAAGAA
ENSMUSG00000044667	Plppr4	3	117319139	117360876	ENSMUST00000061071.12	763	788	+	1.45113	7.98e-06	0.0794	AAAGAAAGAAAGAAAGAAAGAAAGAA
ENSMUSG00000044667	Plppr4	3	117319139	117360876	ENSMUST00000061071.12	799	824	+	-4.71429	4.75e-05	0.158	AAAGAAAGAAAGAAAGAATTGGATGA
ENSMUSG00000044667	Plppr4	3	117319139	117360876	ENSMUST00000061071.12	791	816	+	1.45113	7.98e-06	0.0794	AAAGAAAGAAAGAAAGAAAGAAAGAA
ENSMUSG00000044667	Plppr4	3	117319139	117360876	ENSMUST00000061071.12	767	792	+	1.45113	7.98e-06	0.0794	AAAGAAAGAAAGAAAGAAAGAAAGAA
ENSMUSG00000044667	Plppr4	3	117319139	117360876	ENSMUST00000061071.12	705	730	+	-7.82707	9.93e-05	0.177	AAAGAAAAAGAAAAAGAAAGAGAGAG
ENSMUSG00000044667	Plppr4	3	117319139	117360876	ENSMUST00000061071.12	800	825	+	-3.41353	3.17e-05	0.133	AAGAAAGAAAGAAAGAATTGGATGAA
ENSMUSG00000044667	Plppr4	3	117319139	117360876	ENSMUST00000061071.12	751	776	+	1.45113	7.98e-06	0.0794	AAAGAAAGAAAGAAAGAAAGAAAGAA
ENSMUSG00000044667	Plppr4	3	117319139	117360876	ENSMUST00000061071.12	759	784	+	1.45113	7.98e-06	0.0794	AAAGAAAGAAAGAAAGAAAGAAAGAA
ENSMUSG00000044667	Plppr4	3	117319139	117360876	ENSMUST00000061071.12	803	828	+	-7.62406	9.46e-05	0.177	AAAGAAAGAAAGAATTGGATGAATTG
ENSMUSG00000044667	Plppr4	3	117319139	117360876	ENSMUST00000061071.12	709	734	+	-4.57895	4.55e-05	0.155	AAAAAGAAAAAGAAAGAGAGAGAGAG
ENSMUSG00000044667	Plppr4	3	117319139	117360876	ENSMUST00000061071.12	771	796	+	1.45113	7.98e-06	0.0794	AAAGAAAGAAAGAAAGAAAGAAAGAA
ENSMUSG00000044667	Plppr4	3	117319139	117360876	ENSMUST00000061071.12	775	800	+	1.45113	7.98e-06	0.0794	AAAGAAAGAAAGAAAGAAAGAAAGAA
ENSMUSG00000044667	Plppr4	3	117319139	117360876	ENSMUST00000061071.12	755	780	+	1.45113	7.98e-06	0.0794	AAAGAAAGAAAGAAAGAAAGAAAGAA
ENSMUSG00000044667	Plppr4	3	117319139	117360876	ENSMUST00000061071.12	783	808	+	1.45113	7.98e-06	0.0794	AAAGAAAGAAAGAAAGAAAGAAAGAA
ENSMUSG00000044667	Plppr4	3	117319139	117360876	ENSMUST00000061071.12	787	812	+	1.45113	7.98e-06	0.0794	AAAGAAAGAAAGAAAGAAAGAAAGAA
ENSMUSG00000044667	Plppr4	3	117319139	117360876	ENSMUST00000061071.12	735	760	+	-5.16541	5.32e-05	0.16	AAAGAGAGAAAGAAAGAAAGAAAGAA
ENSMUSG00000044667	Plppr4	3	117319139	117360876	ENSMUST00000061071.12	747	772	+	1.45113	7.98e-06	0.0794	AAAGAAAGAAAGAAAGAAAGAAAGAA
ENSMUSG00000036257	Pnpla8	12	44221370	44322532	ENSMUST00000043082.15	6152	6177	+	11.6466	2.36e-07	0.0692	AAAAAAAAAAAAAAAAATTGGAACTC
ENSMUSG00000036257	Pnpla8	12	44221370	44322532	ENSMUST00000043082.15	6151	6176	+	-7.82707	9.93e-05	0.177	TAAAAAAAAAAAAAAAAATTGGAACT
ENSMUSG00000036257	Pnpla8	12	44221370	44322532	ENSMUST00000043082.15	5378	5403	+	-7.81203	9.9e-05	0.177	AAGAAAAGAAGAGAGGCAAAGAAGGC
ENSMUSG00000036257	Pnpla8	12	44221370	44322532	ENSMUST00000043082.15	9024	9049	+	-2.22556	2.18e-05	0.104	AACAAAAGAAAGAGATTTGTTCAGTG
ENSMUSG00000036257	Pnpla8	12	44221370	44322532	ENSMUST00000043082.15	663	688	+	1.7594	7.34e-06	0.0794	ATTAACAAAAATAAATTATTGAAGTG
ENSMUSG00000036257	Pnpla8	12	44221370	44322532	ENSMUST00000043082.15	8351	8376	+	-6.25564	6.97e-05	0.171	AGCAAGAGAAGGAAAATAGATAAGAG
ENSMUSG00000036257	Pnpla8	12	44221370	44322532	ENSMUST00000043082.15	3930	3955	+	-5.30827	5.53e-05	0.163	AAAAAAAGTAAAGCAACTATTGACTG
ENSMUSG00000036257	Pnpla8	12	44221370	44322532	ENSMUST00000043082.15	4918	4943	+	-6.06015	6.65e-05	0.168	ATATAGAAAAATAAAACTCTTAACAG
ENSMUSG00000031783	Polr2c	8	94857450	94873535	ENSMUST00000211939.1	347	372	+	-7.2406	8.71e-05	0.177	GGCAAAAGAAGGGAAGGAAGGAGGCG
ENSMUSG00000029167	Ppargc1a	5	51454250	51567726	ENSMUST00000132734.7	2746	2771	+	-5.59398	6e-05	0.166	AATAATAATAAAAAGACTATTAAGAG
ENSMUSG00000029167	Ppargc1a	5	51454250	51567726	ENSMUST00000132734.7	3338	3363	+	-7.40602	9.03e-05	0.177	AAAAAAAAAAAAAAGAAATGTAGCAG
ENSMUSG00000029167	Ppargc1a	5	51454250	51567726	ENSMUST00000132734.7	3337	3362	+	-6.69173	7.68e-05	0.172	TAAAAAAAAAAAAAAGAAATGTAGCA
ENSMUSG00000029167	Ppargc1a	5	51454250	51567726	ENSMUST00000132734.7	528	553	+	-2.57895	2.42e-05	0.111	TTAAAAGGAAAGAAAACTCACAAACC
ENSMUSG00000053825	Ppfia2	10	106470339	106935952	ENSMUST00000217854.1	4643	4668	+	-4.33083	4.21e-05	0.15	ATAAAATAATAGACAACATTTGAGTC
ENSMUSG00000046442	Ppm1e	11	87226906	87359023	ENSMUST00000055438.4	2701	2726	+	-3.1203	2.91e-05	0.125	GCAAAACAAATATAAACAAGAAAGTG
ENSMUSG00000046442	Ppm1e	11	87226906	87359023	ENSMUST00000055438.4	1932	1957	+	-4.32331	4.2e-05	0.15	GAGGAGAAAAGAAAAATTTTGAGGTG
ENSMUSG00000024500	Ppp2r2b	18	42637432	43083127	ENSMUST00000025377.13	428	453	+	-7.01504	8.25e-05	0.176	AAAAAAAAAAAATAAACACTGTTTAC
ENSMUSG00000028161	Ppp3ca	3	136670124	136937727	ENSMUST00000070198.13	660	685	+	5.68421	1.89e-06	0.0692	AAAAAATAAAAAAAAATACGACAGTT
ENSMUSG00000028161	Ppp3ca	3	136670124	136937727	ENSMUST00000070198.13	599	624	+	-7.67669	9.57e-05	0.177	AAAAGAAAAAAAAAACCTGGAAAAAA
ENSMUSG00000028161	Ppp3ca	3	136670124	136937727	ENSMUST00000070198.13	963	988	+	-5.84962	6.34e-05	0.166	AAAAAACAAAAACAAACAAAAAAATT
ENSMUSG00000028161	Ppp3ca	3	136670124	136937727	ENSMUST00000070198.13	1013	1038	+	-1.84211	1.92e-05	0.0959	AAAAAAAATAAAATAAAATGGCTGTA
ENSMUSG00000028161	Ppp3ca	3	136670124	136937727	ENSMUST00000070198.13	597	622	+	-5.33835	5.59e-05	0.164	GAAAAAGAAAAAAAAAACCTGGAAAA
ENSMUSG00000028161	Ppp3ca	3	136670124	136937727	ENSMUST00000070198.13	145	170	+	-5.79699	6.27e-05	0.166	ATAAAAATAAAAAAAGAGGGAGAGAG
ENSMUSG00000028161	Ppp3ca	3	136670124	136937727	ENSMUST00000070198.13	554	579	+	-7.69925	9.61e-05	0.177	TAAAAAAAAAAAAAAGAAAAAAAGAA
ENSMUSG00000028161	Ppp3ca	3	136670124	136937727	ENSMUST00000070198.13	578	603	+	0.0300752	1.17e-05	0.0874	AAAAAAGAAAAAAAGAAAAGAAAAAG
ENSMUSG00000028161	Ppp3ca	3	136670124	136937727	ENSMUST00000070198.13	559	584	+	0.879699	9.44e-06	0.0833	AAAAAAAAAAGAAAAAAAGAAAAAAG
ENSMUSG00000028161	Ppp3ca	3	136670124	136937727	ENSMUST00000070198.13	573	598	+	-7.30827	8.86e-05	0.177	AAAAGAAAAAAGAAAAAAAGAAAAGA
ENSMUSG00000028161	Ppp3ca	3	136670124	136937727	ENSMUST00000070198.13	574	599	+	-5.73684	6.19e-05	0.166	AAAGAAAAAAGAAAAAAAGAAAAGAA
ENSMUSG00000028161	Ppp3ca	3	136670124	136937727	ENSMUST00000070198.13	558	583	+	-0.691729	1.41e-05	0.088	AAAAAAAAAAAGAAAAAAAGAAAAAA
ENSMUSG00000028161	Ppp3ca	3	136670124	136937727	ENSMUST00000070198.13	238	263	+	-7.01504	8.25e-05	0.176	TTCTAGGGAAAAAAAGTTTTAAAAAG
ENSMUSG00000028161	Ppp3ca	3	136670124	136937727	ENSMUST00000070198.13	561	586	+	-6.84962	7.93e-05	0.174	AAAAAAAAGAAAAAAAGAAAAAAGAA
ENSMUSG00000028161	Ppp3ca	3	136670124	136937727	ENSMUST00000070198.13	598	623	+	6.92481	1.35e-06	0.0692	AAAAAGAAAAAAAAAACCTGGAAAAA
ENSMUSG00000038582	Pptc7	5	122284365	122324281	ENSMUST00000053426.14	3051	3076	+	-6.72932	7.72e-05	0.172	AAAAAAAAAAAAAAAGAAAAGAAAAA
ENSMUSG00000038582	Pptc7	5	122284365	122324281	ENSMUST00000053426.14	3055	3080	+	-6.56391	7.49e-05	0.172	AAAAAAAAAAAGAAAAGAAAAACATA
ENSMUSG00000038582	Pptc7	5	122284365	122324281	ENSMUST00000053426.14	3060	3085	+	2	6.82e-06	0.0794	AAAAAAGAAAAGAAAAACATAAAACA
ENSMUSG00000038582	Pptc7	5	122284365	122324281	ENSMUST00000053426.14	3043	3068	+	-0.81203	1.45e-05	0.088	AAAAAAAAAAAAAAAAAAAAAAAGAA
ENSMUSG00000038582	Pptc7	5	122284365	122324281	ENSMUST00000053426.14	3046	3071	+	0.879699	9.44e-06	0.0833	AAAAAAAAAAAAAAAAAAAAGAAAAG
ENSMUSG00000038582	Pptc7	5	122284365	122324281	ENSMUST00000053426.14	3048	3073	+	-0.81203	1.45e-05	0.088	AAAAAAAAAAAAAAAAAAGAAAAGAA
ENSMUSG00000038582	Pptc7	5	122284365	122324281	ENSMUST00000053426.14	3061	3086	+	0.323308	1.09e-05	0.0865	AAAAAGAAAAGAAAAACATAAAACAA
ENSMUSG00000038582	Pptc7	5	122284365	122324281	ENSMUST00000053426.14	3047	3072	+	-2.38346	2.28e-05	0.107	AAAAAAAAAAAAAAAAAAAGAAAAGA
ENSMUSG00000024530	Prelid3a	18	67464866	67479835	ENSMUST00000025411.8	87	112	+	-6.94737	8.13e-05	0.175	AAGAAAGGAAAGGAAGTGTGGACGAA
ENSMUSG00000024530	Prelid3a	18	67464866	67479835	ENSMUST00000025411.8	79	104	+	-1.69925	1.84e-05	0.0952	AGTCAAAGAAGAAAGGAAAGGAAGTG
ENSMUSG00000045038	Prkce	17	86167785	86657919	ENSMUST00000097275.8	669	694	+	2.75188	5.3e-06	0.0794	AAAAAAAAGCAGAAAGAAAGGAAGAG
ENSMUSG00000045038	Prkce	17	86167785	86657919	ENSMUST00000097275.8	709	734	+	1.45113	7.98e-06	0.0794	AAAGAAAGAAAGAAAGAAAGAAAGAA
ENSMUSG00000045038	Prkce	17	86167785	86657919	ENSMUST00000097275.8	721	746	+	1.45113	7.98e-06	0.0794	AAAGAAAGAAAGAAAGAAAGAAAGAA
ENSMUSG00000045038	Prkce	17	86167785	86657919	ENSMUST00000097275.8	741	766	+	1.45113	7.98e-06	0.0794	AAAGAAAGAAAGAAAGAAAGAAAGAA
ENSMUSG00000045038	Prkce	17	86167785	86657919	ENSMUST00000097275.8	733	758	+	1.45113	7.98e-06	0.0794	AAAGAAAGAAAGAAAGAAAGAAAGAA
ENSMUSG00000045038	Prkce	17	86167785	86657919	ENSMUST00000097275.8	749	774	+	1.45113	7.98e-06	0.0794	AAAGAAAGAAAGAAAGAAAGAAAGAA
ENSMUSG00000045038	Prkce	17	86167785	86657919	ENSMUST00000097275.8	753	778	+	-5.88722	6.39e-05	0.166	AAAGAAAGAAAGAAAGAAAGAAAACT
ENSMUSG00000045038	Prkce	17	86167785	86657919	ENSMUST00000097275.8	717	742	+	1.45113	7.98e-06	0.0794	AAAGAAAGAAAGAAAGAAAGAAAGAA
ENSMUSG00000045038	Prkce	17	86167785	86657919	ENSMUST00000097275.8	725	750	+	1.45113	7.98e-06	0.0794	AAAGAAAGAAAGAAAGAAAGAAAGAA
ENSMUSG00000045038	Prkce	17	86167785	86657919	ENSMUST00000097275.8	713	738	+	1.45113	7.98e-06	0.0794	AAAGAAAGAAAGAAAGAAAGAAAGAA
ENSMUSG00000045038	Prkce	17	86167785	86657919	ENSMUST00000097275.8	333	358	+	-2.3609	2.27e-05	0.107	AAAAAAAAAAAAACAACTCGAAGACT
ENSMUSG00000045038	Prkce	17	86167785	86657919	ENSMUST00000097275.8	705	730	+	-5.16541	5.32e-05	0.16	GAAGAAAGAAAGAAAGAAAGAAAGAA
ENSMUSG00000045038	Prkce	17	86167785	86657919	ENSMUST00000097275.8	332	357	+	1.03008	9.1e-06	0.0833	AAAAAAAAAAAAAACAACTCGAAGAC
ENSMUSG00000045038	Prkce	17	86167785	86657919	ENSMUST00000097275.8	737	762	+	1.45113	7.98e-06	0.0794	AAAGAAAGAAAGAAAGAAAGAAAGAA
ENSMUSG00000045038	Prkce	17	86167785	86657919	ENSMUST00000097275.8	745	770	+	1.45113	7.98e-06	0.0794	AAAGAAAGAAAGAAAGAAAGAAAGAA
ENSMUSG00000045038	Prkce	17	86167785	86657919	ENSMUST00000097275.8	729	754	+	1.45113	7.98e-06	0.0794	AAAGAAAGAAAGAAAGAAAGAAAGAA
ENSMUSG00000035597	Prpf39	12	65036333	65063386	ENSMUST00000129956.1	1611	1636	+	-5.75188	6.22e-05	0.166	CTAAAAGAACAGGATACTTTAAAAAG
ENSMUSG00000035597	Prpf39	12	65036333	65063386	ENSMUST00000129956.1	1531	1556	+	-7.49624	9.21e-05	0.177	AAAGAAAAGTGGAATTCCTTGAAGAT
ENSMUSG00000035597	Prpf39	12	65036333	65063386	ENSMUST00000129956.1	1666	1691	+	-1.64662	1.82e-05	0.0951	AAGAAAAGAAAGCACACACAGAAGAT
ENSMUSG00000035597	Prpf39	12	65036333	65063386	ENSMUST00000129956.1	834	859	+	-1.42857	1.72e-05	0.0942	AAAACTGGAAAGAATACTTAGAATTC
ENSMUSG00000045114	Prrt2	7	127017531	127021211	ENSMUST00000159916.4	870	895	+	-6.96992	8.16e-05	0.175	AAACAAACAAAAACAGGACCAAAGTT
ENSMUSG00000045114	Prrt2	7	127017531	127021211	ENSMUST00000159916.4	1057	1082	+	-0.759398	1.43e-05	0.088	AAAAAAAAAAAAAAAAGTTGGGGGAA
ENSMUSG00000028909	Ptpru	4	131768457	131838288	ENSMUST00000105987.8	794	819	+	-7.42857	9.08e-05	0.177	AGAGGAAGAAGGGATACTTTGGAATG
ENSMUSG00000043991	Pura	18	36281097	36292535	ENSMUST00000051301.5	117	142	+	-6.01504	6.56e-05	0.166	AAAAAAAAAAAAAAACTCCAAGGGAG
ENSMUSG00000043991	Pura	18	36281097	36292535	ENSMUST00000051301.5	3162	3187	+	-4.60902	4.6e-05	0.155	AAGAAAACTTGAAATGCATTGAAATA
ENSMUSG00000043991	Pura	18	36281097	36292535	ENSMUST00000051301.5	885	910	+	-6.83459	7.9e-05	0.174	AAAAAAGAGAAAGAAAAAGGAAATTT
ENSMUSG00000043991	Pura	18	36281097	36292535	ENSMUST00000051301.5	115	140	+	1.61654	7.64e-06	0.0794	TAAAAAAAAAAAAAAAACTCCAAGGG
ENSMUSG00000043991	Pura	18	36281097	36292535	ENSMUST00000051301.5	3152	3177	+	-7.45865	9.13e-05	0.177	CTAAGTAAAAAAGAAAACTTGAAATG
ENSMUSG00000043991	Pura	18	36281097	36292535	ENSMUST00000051301.5	884	909	+	-5.7218	6.18e-05	0.166	AAAAAAAGAGAAAGAAAAAGGAAATT
ENSMUSG00000043991	Pura	18	36281097	36292535	ENSMUST00000051301.5	3153	3178	+	-7.24812	8.73e-05	0.177	TAAGTAAAAAAGAAAACTTGAAATGC
ENSMUSG00000043991	Pura	18	36281097	36292535	ENSMUST00000051301.5	116	141	+	5.82707	1.82e-06	0.0692	AAAAAAAAAAAAAAAACTCCAAGGGA
ENSMUSG00000043991	Pura	18	36281097	36292535	ENSMUST00000051301.5	1681	1706	+	-6.3985	7.22e-05	0.172	TAAAAAAAGAAAAAAGAAAAAAAGAG
ENSMUSG00000030793	Pycard	7	127989708	127993867	ENSMUST00000033056.4	442	467	+	-4.30075	4.18e-05	0.15	CAAAAACAAAAAAAAAACAGGCAATG
ENSMUSG00000030793	Pycard	7	127989708	127993867	ENSMUST00000033056.4	443	468	+	0.744361	9.73e-06	0.0833	AAAAACAAAAAAAAAACAGGCAATGG
ENSMUSG00000021062	Rab15	12	76797960	76822908	ENSMUST00000021459.13	1364	1389	+	0.37594	1.08e-05	0.086	AACAAACAAAGCCAACCCTGGTAGGG
ENSMUSG00000021700	Rab3c	13	110054187	110280996	ENSMUST00000167824.2	2067	2092	+	-1.97744	2e-05	0.0987	ATAAAGGGAAAGAGAGAAGTGAGGGG
ENSMUSG00000021700	Rab3c	13	110054187	110280996	ENSMUST00000167824.2	1496	1521	+	-5.27068	5.49e-05	0.163	AAAAAAAGGAGGAGGAGGAGGAAGAG
ENSMUSG00000021700	Rab3c	13	110054187	110280996	ENSMUST00000167824.2	1994	2019	+	1.3985	8.14e-06	0.0802	ATCAAAGATAAGAAGACACTGGTGAT
ENSMUSG00000022248	Rad1	15	10486018	10499063	ENSMUST00000100775.9	681	706	+	0.879699	9.44e-06	0.0833	AACAGAGGAATGCAAACACAGAAGGT
ENSMUSG00000022248	Rad1	15	10486018	10499063	ENSMUST00000100775.9	1273	1298	+	-7.51128	9.23e-05	0.177	AGGAACGCTAGGAGTACTTGAATGTG
ENSMUSG00000038569	Rad9b	5	122323223	122354233	ENSMUST00000117263.7	922	947	+	-5.58647	5.98e-05	0.166	AATATAGATGGAAAAGCTATAAACTT
ENSMUSG00000038646	Ramac	7	81762925	81769491	ENSMUST00000042166.10	627	652	+	-1.36842	1.68e-05	0.0932	CTTACAACAAGGAAGACATGGATGTG
ENSMUSG00000038807	Rap1gap2	11	74383356	74610915	ENSMUST00000102521.8	3971	3996	+	-7.41353	9.05e-05	0.177	AAACAAATTCTAAAAGGTTGAAAATG
ENSMUSG00000036894	Rap2b	3	61361638	61368430	ENSMUST00000049064.3	338	363	+	-6.79699	7.85e-05	0.174	AACCTGAAAAAAAAAAAATGGGGGTG
ENSMUSG00000038020	Rapgefl1	11	98836785	98853697	ENSMUST00000107479.2	1770	1795	+	5.14286	2.26e-06	0.0756	AAAGGAAAAAAAAATACACTAAAGTC
ENSMUSG00000049892	Rasd1	11	59963181	59964944	ENSMUST00000062405.7	491	516	+	-6.57143	7.5e-05	0.172	CAAAAGAAAAACAAAACACAAAACTT
ENSMUSG00000030134	Rasgef1a	6	118011438	118091546	ENSMUST00000164960.3	898	923	+	-2.56391	2.4e-05	0.111	AGAGAAGGAAAAGAAACATGGGTATG
ENSMUSG00000032356	Rasgrf1	9	89909908	90026977	ENSMUST00000189545.1	1956	1981	+	-7.31579	8.88e-05	0.177	ATCTAAGCAAAGCAAGGGGTGAAGGG
ENSMUSG00000021708	Rasgrf2	13	91880400	92131656	ENSMUST00000151408.7	3000	3025	+	-1.21805	1.61e-05	0.0907	AAAAAAGATAAAAAAGGTTTTATTTA
ENSMUSG00000027347	Rasgrp1	2	117279993	117343001	ENSMUST00000102534.10	1585	1610	+	0.180451	1.13e-05	0.0874	ATCAAAGGAAAAAGTGTTTAAAAGTT
ENSMUSG00000032946	Rasgrp2	19	6399340	6415216	ENSMUST00000127021.7	1320	1345	+	-6.61654	7.56e-05	0.172	AGCAATGCAAAGAGCGCCTGTCAGTG
ENSMUSG00000034209	Rasl10a	11	5058128	5060385	ENSMUST00000037218.1	292	317	+	-3.42857	3.19e-05	0.133	AAAAACAAATGCAAAAACTGTAAATG
ENSMUSG00000025795	Rassf3	10	121410350	121476347	ENSMUST00000026902.8	2234	2259	+	-6.92481	8.09e-05	0.175	ATAAAGGAAGAAAAAGCATAAAGGAA
ENSMUSG00000025795	Rassf3	10	121410350	121476347	ENSMUST00000026902.8	2233	2258	+	-1.62406	1.81e-05	0.0951	CATAAAGGAAGAAAAAGCATAAAGGA
ENSMUSG00000008658	Rbfox1	16	5885355	7411526	ENSMUST00000056416.8	933	958	+	-0.0075188	1.18e-05	0.0874	AAAGAAAGTAATAAAAACTTAAATTC
ENSMUSG00000008658	Rbfox1	16	5885355	7411526	ENSMUST00000056416.8	44	69	+	-4.24812	4.12e-05	0.149	AACAAAAAAAACCCAACCTTCCAATG
ENSMUSG00000008658	Rbfox1	16	5885355	7411526	ENSMUST00000056416.8	151	176	+	-5.84211	6.33e-05	0.166	TAAAAAGAAAAAAAAATTAAAAAAAG
ENSMUSG00000008658	Rbfox1	16	5885355	7411526	ENSMUST00000056416.8	1329	1354	+	-5.8797	6.38e-05	0.166	AACACAAGACAAAAAACAAGAACTAG
ENSMUSG00000025576	Rbfox3	11	118489762	118911597	ENSMUST00000117731.7	1126	1151	+	-7.6391	9.5e-05	0.177	AGAAAAAAAAAAAAAAATTAACAGAA
ENSMUSG00000025576	Rbfox3	11	118489762	118911597	ENSMUST00000117731.7	1124	1149	+	-6.55639	7.47e-05	0.172	AAAGAAAAAAAAAAAAAAATTAACAG
ENSMUSG00000025576	Rbfox3	11	118489762	118911597	ENSMUST00000117731.7	44	69	+	-5.88722	6.39e-05	0.166	AAAAAACAAAAAAAATCACAAAACAA
ENSMUSG00000025576	Rbfox3	11	118489762	118911597	ENSMUST00000117731.7	72	97	+	-5.5188	5.89e-05	0.166	AACAAAACAAAAAAAGATGTTAAGAT
ENSMUSG00000025576	Rbfox3	11	118489762	118911597	ENSMUST00000117731.7	1120	1145	+	-6.56391	7.49e-05	0.172	CAAAAAAGAAAAAAAAAAAAAAATTA
ENSMUSG00000078184	Rbm8a2	1	175977777	175979114	ENSMUST00000104983.1	561	586	+	-6.78195	7.82e-05	0.174	ATCAAAGGAAAAAAGAAAGTAGAATA
ENSMUSG00000078184	Rbm8a2	1	175977777	175979114	ENSMUST00000104983.1	569	594	+	-4	3.84e-05	0.146	AAAAAAGAAAGTAGAATAATAAAATA
ENSMUSG00000029363	Rfc5	5	117378103	117389047	ENSMUST00000086461.12	514	539	+	-2.6015	2.43e-05	0.111	AAAATAGGAAAGAAACTACAACAGTT
ENSMUSG00000020846	Rflnb	11	76019194	76027782	ENSMUST00000021207.6	656	681	+	-6.15789	6.8e-05	0.168	AACAAAAACAAAAAAAAACACAAAAG
ENSMUSG00000020846	Rflnb	11	76019194	76027782	ENSMUST00000021207.6	227	252	+	-6.58647	7.52e-05	0.172	TTAAAAAAAAAAAAAGTGTGTGTGTG
ENSMUSG00000020846	Rflnb	11	76019194	76027782	ENSMUST00000021207.6	155	180	+	-7.5188	9.25e-05	0.177	TTAAAAAAAAAAAAATCACTGCATCT
ENSMUSG00000020846	Rflnb	11	76019194	76027782	ENSMUST00000021207.6	662	687	+	-6.83459	7.9e-05	0.174	AACAAAAAAAAACACAAAAGGAGATG
ENSMUSG00000020846	Rflnb	11	76019194	76027782	ENSMUST00000021207.6	658	683	+	0.87218	9.45e-06	0.0833	CAAAAACAAAAAAAAACACAAAAGGA
ENSMUSG00000030844	Rgs10	7	128373621	128418758	ENSMUST00000033133.11	162	187	+	6	1.74e-06	0.0692	TTAAAAACAAAAGTAGCTTTAAAGTG
ENSMUSG00000019775	Rgs17	10	5825663	5922400	ENSMUST00000064225.13	678	703	+	-5.16541	5.32e-05	0.16	TAAGAAAGAAAGAAAGAAAGAAAGAA
ENSMUSG00000019775	Rgs17	10	5825663	5922400	ENSMUST00000064225.13	19	44	+	1.52632	7.84e-06	0.0794	AAAAAAAAAAAAAATCCATTTCAGAG
ENSMUSG00000019775	Rgs17	10	5825663	5922400	ENSMUST00000064225.13	682	707	+	1.45113	7.98e-06	0.0794	AAAGAAAGAAAGAAAGAAAGAAAGAA
ENSMUSG00000019775	Rgs17	10	5825663	5922400	ENSMUST00000064225.13	2861	2886	+	-1.59398	1.79e-05	0.0951	AATAAACAAACAAAAGCCCACAACTG
ENSMUSG00000019775	Rgs17	10	5825663	5922400	ENSMUST00000064225.13	694	719	+	1.45113	7.98e-06	0.0794	AAAGAAAGAAAGAAAGAAAGAAAGAA
ENSMUSG00000019775	Rgs17	10	5825663	5922400	ENSMUST00000064225.13	751	776	+	-4.00752	3.85e-05	0.146	AGGAAAAGAAAGAAAGAAGGAAAGAA
ENSMUSG00000019775	Rgs17	10	5825663	5922400	ENSMUST00000064225.13	706	731	+	-5.88722	6.39e-05	0.166	AAAGAAAGAAAGAAAGAAAGAAAAGA
ENSMUSG00000019775	Rgs17	10	5825663	5922400	ENSMUST00000064225.13	690	715	+	1.45113	7.98e-06	0.0794	AAAGAAAGAAAGAAAGAAAGAAAGAA
ENSMUSG00000019775	Rgs17	10	5825663	5922400	ENSMUST00000064225.13	764	789	+	-3.59398	3.35e-05	0.134	AAGAAGGAAAGAAGAAAAAGAAAGAG
ENSMUSG00000019775	Rgs17	10	5825663	5922400	ENSMUST00000064225.13	686	711	+	1.45113	7.98e-06	0.0794	AAAGAAAGAAAGAAAGAAAGAAAGAA
ENSMUSG00000019775	Rgs17	10	5825663	5922400	ENSMUST00000064225.13	710	735	+	4.71429	2.58e-06	0.0794	AAAGAAAGAAAGAAAGAAAAGAAGAG
ENSMUSG00000019775	Rgs17	10	5825663	5922400	ENSMUST00000064225.13	702	727	+	1.45113	7.98e-06	0.0794	AAAGAAAGAAAGAAAGAAAGAAAGAA
ENSMUSG00000019775	Rgs17	10	5825663	5922400	ENSMUST00000064225.13	698	723	+	1.45113	7.98e-06	0.0794	AAAGAAAGAAAGAAAGAAAGAAAGAA
ENSMUSG00000019775	Rgs17	10	5825663	5922400	ENSMUST00000064225.13	733	758	+	-2.89474	2.68e-05	0.117	GAGAAAAAAAGGAAAGAAAGGAAAAG
ENSMUSG00000019775	Rgs17	10	5825663	5922400	ENSMUST00000064225.13	737	762	+	-2.62406	2.44e-05	0.111	AAAAAAGGAAAGAAAGGAAAAGAAAG
ENSMUSG00000019775	Rgs17	10	5825663	5922400	ENSMUST00000064225.13	1192	1217	+	-4.59398	4.57e-05	0.155	TTACAAAGAAGAAAACCTTCAATGTC
ENSMUSG00000026360	Rgs2	1	143999338	144004161	ENSMUST00000127206.7	961	986	+	6.6015	1.46e-06	0.0692	AAAAAGAAAAAAAGAGCATTGACCTG
ENSMUSG00000026360	Rgs2	1	143999338	144004161	ENSMUST00000127206.7	69	94	+	-7.65414	9.54e-05	0.177	CAGAAAAAAAAAAAAAACTGACCTTG
ENSMUSG00000026360	Rgs2	1	143999338	144004161	ENSMUST00000127206.7	74	99	+	0.368421	1.08e-05	0.086	AAAAAAAAAAAACTGACCTTGAATTC
ENSMUSG00000026360	Rgs2	1	143999338	144004161	ENSMUST00000127206.7	956	981	+	-4.15038	4.01e-05	0.147	AAAAGAAAAAGAAAAAAAGAGCATTG
ENSMUSG00000002459	Rgs20	1	4909576	5070285	ENSMUST00000002533.14	766	791	+	-4.62406	4.63e-05	0.156	TTAGTAAGGAAAACAACACTTAAGTG
ENSMUSG00000038530	Rgs4	1	169741477	169747642	ENSMUST00000027991.11	1375	1400	+	-2.88722	2.67e-05	0.117	AAGAAAGAGAAAAGAAAACAGAAGAG
ENSMUSG00000038530	Rgs4	1	169741477	169747642	ENSMUST00000027991.11	561	586	+	-1.78195	1.88e-05	0.0952	AGAAAAGATGGGAAAGATCCTAGGTG
ENSMUSG00000026678	Rgs5	1	169655501	169695813	ENSMUST00000027997.8	734	759	+	-4.93233	5.04e-05	0.16	AACAATGGAAACAATAATTTAAAATT
ENSMUSG00000021719	Rgs7bp	13	104945904	105054930	ENSMUST00000063551.6	245	270	+	-3.47368	3.22e-05	0.133	AAAGAAAGAAAGGAAGGAAGGAAGGA
ENSMUSG00000021719	Rgs7bp	13	104945904	105054930	ENSMUST00000063551.6	229	254	+	1.45113	7.98e-06	0.0794	AAAGAAAGAAAGAAAGAAAGAAAGAA
ENSMUSG00000021719	Rgs7bp	13	104945904	105054930	ENSMUST00000063551.6	282	307	+	2.81203	5.2e-06	0.0794	AAGAAAGAAAGAACAGATTCAAAGAG
ENSMUSG00000021719	Rgs7bp	13	104945904	105054930	ENSMUST00000063551.6	193	218	+	1.45113	7.98e-06	0.0794	AAAGAAAGAAAGAAAGAAAGAAAGAA
ENSMUSG00000021719	Rgs7bp	13	104945904	105054930	ENSMUST00000063551.6	189	214	+	1.45113	7.98e-06	0.0794	AAAGAAAGAAAGAAAGAAAGAAAGAA
ENSMUSG00000021719	Rgs7bp	13	104945904	105054930	ENSMUST00000063551.6	185	210	+	-4.58647	4.56e-05	0.155	AGAGAAAGAAAGAAAGAAAGAAAGAA
ENSMUSG00000021719	Rgs7bp	13	104945904	105054930	ENSMUST00000063551.6	197	222	+	1.45113	7.98e-06	0.0794	AAAGAAAGAAAGAAAGAAAGAAAGAA
ENSMUSG00000021719	Rgs7bp	13	104945904	105054930	ENSMUST00000063551.6	1887	1912	+	-3.39098	3.14e-05	0.132	AACAATGGAAAGAATTATTTAAAGAC
ENSMUSG00000021719	Rgs7bp	13	104945904	105054930	ENSMUST00000063551.6	237	262	+	3.14286	4.55e-06	0.0794	AAAGAAAGAAAGAAAGAAAGGAAGGA
ENSMUSG00000021719	Rgs7bp	13	104945904	105054930	ENSMUST00000063551.6	4060	4085	+	-5.54887	5.92e-05	0.166	ATGAAAAGAAAGTAATATTTACAATG
ENSMUSG00000021719	Rgs7bp	13	104945904	105054930	ENSMUST00000063551.6	201	226	+	1.45113	7.98e-06	0.0794	AAAGAAAGAAAGAAAGAAAGAAAGAA
ENSMUSG00000021719	Rgs7bp	13	104945904	105054930	ENSMUST00000063551.6	221	246	+	1.45113	7.98e-06	0.0794	AAAGAAAGAAAGAAAGAAAGAAAGAA
ENSMUSG00000021719	Rgs7bp	13	104945904	105054930	ENSMUST00000063551.6	213	238	+	1.45113	7.98e-06	0.0794	AAAGAAAGAAAGAAAGAAAGAAAGAA
ENSMUSG00000021719	Rgs7bp	13	104945904	105054930	ENSMUST00000063551.6	250	275	+	-7.81955	9.92e-05	0.177	AAGAAAGGAAGGAAGGAAGGAAGGAA
ENSMUSG00000021719	Rgs7bp	13	104945904	105054930	ENSMUST00000063551.6	181	206	+	-5.16541	5.32e-05	0.16	GAAAAGAGAAAGAAAGAAAGAAAGAA
ENSMUSG00000021719	Rgs7bp	13	104945904	105054930	ENSMUST00000063551.6	233	258	+	1.45113	7.98e-06	0.0794	AAAGAAAGAAAGAAAGAAAGAAAGGA
ENSMUSG00000021719	Rgs7bp	13	104945904	105054930	ENSMUST00000063551.6	209	234	+	1.45113	7.98e-06	0.0794	AAAGAAAGAAAGAAAGAAAGAAAGAA
ENSMUSG00000021719	Rgs7bp	13	104945904	105054930	ENSMUST00000063551.6	2311	2336	+	-7.84962	9.99e-05	0.177	GTTAAAAAAAAAAAAAAATTCAGGTC
ENSMUSG00000021719	Rgs7bp	13	104945904	105054930	ENSMUST00000063551.6	205	230	+	1.45113	7.98e-06	0.0794	AAAGAAAGAAAGAAAGAAAGAAAGAA
ENSMUSG00000021719	Rgs7bp	13	104945904	105054930	ENSMUST00000063551.6	241	266	+	3.14286	4.55e-06	0.0794	AAAGAAAGAAAGAAAGGAAGGAAGGA
ENSMUSG00000021719	Rgs7bp	13	104945904	105054930	ENSMUST00000063551.6	217	242	+	1.45113	7.98e-06	0.0794	AAAGAAAGAAAGAAAGAAAGAAAGAA
ENSMUSG00000021719	Rgs7bp	13	104945904	105054930	ENSMUST00000063551.6	225	250	+	1.45113	7.98e-06	0.0794	AAAGAAAGAAAGAAAGAAAGAAAGAA
ENSMUSG00000042671	Rgs8	1	153653025	153700323	ENSMUST00000041776.11	3055	3080	+	6.18797	1.65e-06	0.0692	ACAAAAGAAAGAAGCTCCTGGATGTG
ENSMUSG00000042671	Rgs8	1	153653025	153700323	ENSMUST00000041776.11	4732	4757	+	-4.30827	4.19e-05	0.15	AACATAATAAACAAAACCTGAACAAG
ENSMUSG00000042671	Rgs8	1	153653025	153700323	ENSMUST00000041776.11	6582	6607	+	-1.7594	1.87e-05	0.0952	AATAATAGAAGGAAAATAAGGAACTC
ENSMUSG00000042671	Rgs8	1	153653025	153700323	ENSMUST00000041776.11	3181	3206	+	-5.75188	6.22e-05	0.166	ATCATCAACAACAAAAAACTTAAGTG
ENSMUSG00000035226	Rims4	2	163859751	163918683	ENSMUST00000044734.2	2202	2227	+	-2.2406	2.19e-05	0.104	CTCCAAAGCAATAACACCCTGAGGTG
ENSMUSG00000036006	Ripor2	13	24501525	24733816	ENSMUST00000132689.7	2443	2468	+	-4.26316	4.14e-05	0.15	AGAAAAAAAAAAGCATCCTTGAATGG
ENSMUSG00000057455	Rit2	18	30973489	31317290	ENSMUST00000082070.12	690	715	+	-4.6015	4.59e-05	0.155	AAAGAAAATCTGCAAACTTGTAACTG
ENSMUSG00000057455	Rit2	18	30973489	31317290	ENSMUST00000082070.12	2001	2026	+	1.90226	7.03e-06	0.0794	CAAAATGGAAAGAAAAGATGAAACTT
ENSMUSG00000017144	Rnd3	2	51130438	51149111	ENSMUST00000154545.1	440	465	+	-4.81203	4.89e-05	0.16	TAAAAAAAAAAGATCACTCTGTGATG
ENSMUSG00000043419	Rnf227	11	69340461	69342641	ENSMUST00000129321.1	269	294	+	6.96992	1.33e-06	0.0692	AAAAAAAATAACAAAGCTTTGGCGTT
ENSMUSG00000043419	Rnf227	11	69340461	69342641	ENSMUST00000129321.1	975	1000	+	-3.8797	3.7e-05	0.143	TAAAACACTAGTGACGCATTAAAGTG
ENSMUSG00000029634	Rnf6	5	146209192	146221555	ENSMUST00000161859.7	87	112	+	-7.30075	8.84e-05	0.177	AAAAAAAAACAAAAAACAAAAAAACC
ENSMUSG00000029634	Rnf6	5	146209192	146221555	ENSMUST00000161859.7	962	987	+	0.458647	1.05e-05	0.0852	ATAAACACAAAGTATGCATTAAAGTC
ENSMUSG00000090083	Rnf8	17	29614790	29644991	ENSMUST00000024817.14	1998	2023	+	-5.56391	5.94e-05	0.166	AAAAAAAAAAAAACACCCTTGAGACC
ENSMUSG00000090083	Rnf8	17	29614790	29644991	ENSMUST00000024817.14	1997	2022	+	1.02256	9.11e-06	0.0833	AAAAAAAAAAAAAACACCCTTGAGAC
ENSMUSG00000090083	Rnf8	17	29614790	29644991	ENSMUST00000024817.14	1995	2020	+	-6.10526	6.73e-05	0.168	TTAAAAAAAAAAAAAACACCCTTGAG
ENSMUSG00000090083	Rnf8	17	29614790	29644991	ENSMUST00000024817.14	2716	2741	+	-2.82707	2.63e-05	0.116	AACAACAGTAGTAAAGACTTGCAAGG
ENSMUSG00000032238	Rora	9	68653786	69388246	ENSMUST00000034766.13	831	856	+	-4.90977	5.01e-05	0.16	AACAAAAAAAGAAAAAAAAAGAAAAA
ENSMUSG00000032238	Rora	9	68653786	69388246	ENSMUST00000034766.13	9092	9117	+	-0.969925	1.5e-05	0.0887	TAAAAAAAAAAGAGAGATTTAATGTT
ENSMUSG00000032238	Rora	9	68653786	69388246	ENSMUST00000034766.13	3888	3913	+	-4.13534	3.99e-05	0.147	AAACAAAGAAAGAAAGTAATGTAATT
ENSMUSG00000032238	Rora	9	68653786	69388246	ENSMUST00000034766.13	835	860	+	-6.45865	7.33e-05	0.172	AAAAAAGAAAAAAAAAGAAAAAACAA
ENSMUSG00000032238	Rora	9	68653786	69388246	ENSMUST00000034766.13	845	870	+	-5.60902	6.02e-05	0.166	AAAAAAGAAAAAACAACAAAAAAAAA
ENSMUSG00000032238	Rora	9	68653786	69388246	ENSMUST00000034766.13	4846	4871	+	-1.28571	1.65e-05	0.0923	GTGAATGGAAGATGAATCCGGAAGTG
ENSMUSG00000032238	Rora	9	68653786	69388246	ENSMUST00000034766.13	3860	3885	+	-0.699248	1.41e-05	0.088	AAAGAAAAAAAAAAGATTTTGTAATG
ENSMUSG00000032238	Rora	9	68653786	69388246	ENSMUST00000034766.13	3889	3914	+	-4.41353	4.33e-05	0.152	AACAAAGAAAGAAAGTAATGTAATTT
ENSMUSG00000032238	Rora	9	68653786	69388246	ENSMUST00000034766.13	842	867	+	-7.30075	8.84e-05	0.177	AAAAAAAAAGAAAAAACAACAAAAAA
ENSMUSG00000062006	Rpl34	3	130726831	130730398	ENSMUST00000133802.5	252	277	+	-3.93233	3.78e-05	0.146	GACAAAGGTAGAAAAGATTGTGAAGG
ENSMUSG00000004896	Rrnad1	3	87922601	87930717	ENSMUST00000160648.7	1100	1125	+	-2.34586	2.26e-05	0.107	ATCAAAGTAGGAATCGGCTTTAAGTG
ENSMUSG00000044098	Rsbn1	3	103914120	103966636	ENSMUST00000068879.10	1542	1567	+	-4.23308	4.1e-05	0.149	CAAATAAATAGGGAAACACTTCAATG
ENSMUSG00000044098	Rsbn1	3	103914120	103966636	ENSMUST00000068879.10	265	290	+	-5.39098	5.69e-05	0.165	ATCAAAAAAAGAATTCTCTGGAATAG
ENSMUSG00000038570	Saxo2	7	82632960	82648528	ENSMUST00000207693.1	1328	1353	+	-3.52632	3.28e-05	0.134	AAAAATTGAAGATAAGCTATAAATTA
ENSMUSG00000038570	Saxo2	7	82632960	82648528	ENSMUST00000207693.1	747	772	+	-6.90226	8.03e-05	0.175	AACAGAGAGCTGCAAACCTTTAAATG
ENSMUSG00000064329	Scn1a	2	66270778	66440840	ENSMUST00000200839.3	1902	1927	+	-0.0451128	1.19e-05	0.0874	AAACAACAAAAAAAAATAATAAATTG
ENSMUSG00000064329	Scn1a	2	66270778	66440840	ENSMUST00000200839.3	1690	1715	+	-6.31579	7.09e-05	0.172	ATACAATAAGAACAAACTCAAAGGTG
ENSMUSG00000075318	Scn2a	2	65620771	65767447	ENSMUST00000028377.13	1111	1136	+	-7.67669	9.57e-05	0.177	AAACAAAACAAAACAAAACAAAAGTC
ENSMUSG00000075318	Scn2a	2	65620771	65767447	ENSMUST00000028377.13	937	962	+	-7.65414	9.54e-05	0.177	AAAAAAAAAAAAAAAGTATATATATA
ENSMUSG00000070304	Scn2b	9	45117782	45130070	ENSMUST00000170998.8	538	563	+	-7.3985	9.02e-05	0.177	GAAAAAGGAAAGATAGGGCTGAGTCG
ENSMUSG00000063253	Scoc	8	83430084	83458391	ENSMUST00000081506.10	321	346	+	-5.20301	5.38e-05	0.161	ATATACAAAAAAATAACCATGTTGTG
ENSMUSG00000017009	Sdc4	2	164424247	164443887	ENSMUST00000017153.3	1802	1827	+	2.36842	5.99e-06	0.0794	TAAAAAGATAATAAAACCTGGTACTT
ENSMUSG00000017009	Sdc4	2	164424247	164443887	ENSMUST00000017153.3	598	623	+	-5.04511	5.17e-05	0.16	TTTAAAAAAAAAAAATCTAGGGAGGG
ENSMUSG00000030839	Sergef	7	46443154	46639807	ENSMUST00000216505.1	511	536	+	-5.42857	5.73e-05	0.165	AGAGAGAAAAAGAAAGCAAGAAAAAG
ENSMUSG00000030839	Sergef	7	46443154	46639807	ENSMUST00000216505.1	537	562	+	1.76692	7.33e-06	0.0794	AACAAGAACAAGAAAGCAAGAGAGAG
ENSMUSG00000030839	Sergef	7	46443154	46639807	ENSMUST00000216505.1	529	554	+	-3.6015	3.36e-05	0.134	AGAAAAAGAACAAGAACAAGAAAGCA
ENSMUSG00000038332	Sesn1	10	41809935	41908424	ENSMUST00000041438.6	882	907	+	-7.58647	9.36e-05	0.177	GAATAAAGCTGGAAAATATTTTAGTG
ENSMUSG00000031671	Setd6	8	95715881	95719010	ENSMUST00000034096.5	86	111	+	8.33083	8.75e-07	0.0692	ATCAAAGGAAAAATAGCTAAAAAGTA
ENSMUSG00000027833	Shox2	3	66971727	66981771	ENSMUST00000162098.8	511	536	+	-2.20301	2.16e-05	0.104	AAATACGGAAAAATAACCTGGATGAA
ENSMUSG00000027833	Shox2	3	66971727	66981771	ENSMUST00000162098.8	854	879	+	-3.34586	3.1e-05	0.13	AAAAAAGAAAGAAAAGAAAAGAAAAA
ENSMUSG00000027833	Shox2	3	66971727	66981771	ENSMUST00000162098.8	402	427	+	-1.76692	1.88e-05	0.0952	CAAACTAGAAAGAAAACGAGAAAGGG
ENSMUSG00000042700	Sipa1l1	12	82169320	82451786	ENSMUST00000166429.8	180	205	+	-5.78947	6.26e-05	0.166	AAAAATTAAATAAAAATTTTAAAAAG
ENSMUSG00000042700	Sipa1l1	12	82169320	82451786	ENSMUST00000166429.8	199	224	+	-4.09774	3.95e-05	0.147	TAAAAAGTAAAATAAAAATTTAACTG
ENSMUSG00000054021	Sirt5	13	43365496	43395203	ENSMUST00000222106.1	686	711	+	1.81203	7.25e-06	0.0794	AAAAAAGAAAAAAGAACTTTCCAGAT
ENSMUSG00000027636	Sla2	2	156872457	156887192	ENSMUST00000029164.8	11	36	+	-7.77444	9.83e-05	0.177	CAAAGAGAAAGGGAACCAAGACTGTG
ENSMUSG00000030500	Slc17a6	7	51622006	51671119	ENSMUST00000207945.1	1716	1741	+	-1.90226	1.95e-05	0.0968	AAAAGAGGCAAGAAAAAAAGAGAGAG
ENSMUSG00000026904	Slc4a10	2	62046462	62326730	ENSMUST00000102735.9	1539	1564	+	-6.18797	6.86e-05	0.169	ATAAATGGTAAAGAAAAATGCAAAAG
ENSMUSG00000060961	Slc4a4	5	88886486	89239653	ENSMUST00000148750.7	311	336	+	-4.93985	5.05e-05	0.16	AAAAAAAAAAAGAAGCATTTGAGGGT
ENSMUSG00000060961	Slc4a4	5	88886486	89239653	ENSMUST00000148750.7	3310	3335	+	-7	8.2e-05	0.176	CTTTAAAAAAAAAAAACATTTGAGTT
ENSMUSG00000060961	Slc4a4	5	88886486	89239653	ENSMUST00000148750.7	312	337	+	-7.4812	9.17e-05	0.177	AAAAAAAAAAGAAGCATTTGAGGGTC
ENSMUSG00000060961	Slc4a4	5	88886486	89239653	ENSMUST00000148750.7	633	658	+	-4.06767	3.92e-05	0.147	ATCAAAAGCAGAAAACACTAAAGGTA
ENSMUSG00000060961	Slc4a4	5	88886486	89239653	ENSMUST00000148750.7	310	335	+	7.29323	1.2e-06	0.0692	AAAAAAAAAAAAGAAGCATTTGAGGG
ENSMUSG00000021040	Slirp	12	87443896	87452206	ENSMUST00000161023.7	1552	1577	+	-5.20301	5.38e-05	0.161	AAAAAGAAAACACAAAGTTGGGTGTG
ENSMUSG00000021040	Slirp	12	87443896	87452206	ENSMUST00000161023.7	1546	1571	+	0.902256	9.39e-06	0.0833	TAAAACAAAAAGAAAACACAAAGTTG
ENSMUSG00000024921	Smarca2	19	26605050	26778322	ENSMUST00000208915.1	1282	1307	+	-6.8797	7.98e-05	0.174	AACAAAAAAAAAAGCTTTTTGACTTG
ENSMUSG00000024054	Smchd1	17	71344489	71475343	ENSMUST00000127430.1	605	630	+	-4.75188	4.81e-05	0.159	ATTAAAGAAAACAAGAATTCAAAGAG
ENSMUSG00000027534	Snx16	3	10417817	10440102	ENSMUST00000099223.10	196	221	+	-6.63158	7.58e-05	0.172	AAAAAAAAAAAACCCAGTTAGAATTG
ENSMUSG00000027534	Snx16	3	10417817	10440102	ENSMUST00000099223.10	192	217	+	-5.49624	5.86e-05	0.166	AAAAAAAAAAAAAAAACCCAGTTAGA
ENSMUSG00000027534	Snx16	3	10417817	10440102	ENSMUST00000099223.10	193	218	+	-4.45865	4.37e-05	0.152	AAAAAAAAAAAAAAACCCAGTTAGAA
ENSMUSG00000027534	Snx16	3	10417817	10440102	ENSMUST00000099223.10	191	216	+	-7.31579	8.88e-05	0.177	AAAAAAAAAAAAAAAAACCCAGTTAG
ENSMUSG00000020027	Socs2	10	95385362	95417180	ENSMUST00000139210.7	1202	1227	+	5.84962	1.81e-06	0.0692	AAAAAAAAAAAAAACAACTAAAATTG
ENSMUSG00000020027	Socs2	10	95385362	95417180	ENSMUST00000139210.7	1200	1225	+	-5.74436	6.2e-05	0.166	AAAAAAAAAAAAAAAACAACTAAAAT
ENSMUSG00000020027	Socs2	10	95385362	95417180	ENSMUST00000139210.7	1196	1221	+	-6.69925	7.69e-05	0.172	AAAAAAAAAAAAAAAAAAAACAACTA
ENSMUSG00000020027	Socs2	10	95385362	95417180	ENSMUST00000139210.7	1203	1228	+	-6.68421	7.67e-05	0.172	AAAAAAAAAAAAACAACTAAAATTGG
ENSMUSG00000020027	Socs2	10	95385362	95417180	ENSMUST00000139210.7	1201	1226	+	4.15038	3.16e-06	0.0794	AAAAAAAAAAAAAAACAACTAAAATT
ENSMUSG00000031626	Sorbs2	8	45507788	45827906	ENSMUST00000124544.7	1197	1222	+	-5.93233	6.46e-05	0.166	CTAAAGAGAAGAAATGTCTTAAATGG
ENSMUSG00000044352	Sowaha	11	53476573	53480274	ENSMUST00000104955.3	1222	1247	+	0.699248	9.84e-06	0.084	AAAACTGATAAATAGAAACTGAAGTG
ENSMUSG00000044352	Sowaha	11	53476573	53480274	ENSMUST00000104955.3	959	984	+	-2.15038	2.13e-05	0.103	AGAAAATGAACAAACAAACAAAAGTG
ENSMUSG00000044352	Sowaha	11	53476573	53480274	ENSMUST00000104955.3	930	955	+	9.69173	5.24e-07	0.0692	CCAGAAGAAAAAAAAACCTCAAAGTG
ENSMUSG00000029309	Sparcl1	5	104079111	104113733	ENSMUST00000031249.7	180	205	+	-4.08271	3.94e-05	0.147	AACTTAGGAAATGAAACTTTAAAATT
ENSMUSG00000026163	Sphkap	1	83254139	83408200	ENSMUST00000160953.7	1781	1806	+	-5.88722	6.39e-05	0.166	AAAGAAAGAAAGAAAGAAAGAAAAGA
ENSMUSG00000026163	Sphkap	1	83254139	83408200	ENSMUST00000160953.7	1794	1819	+	-4.58647	4.56e-05	0.155	AAGAAAGAAAAGAAAGAAAGACAGAA
ENSMUSG00000026163	Sphkap	1	83254139	83408200	ENSMUST00000160953.7	1790	1815	+	2.03008	6.73e-06	0.0794	AAGAAAGAAAGAAAAGAAAGAAAGAC
ENSMUSG00000026163	Sphkap	1	83254139	83408200	ENSMUST00000160953.7	1777	1802	+	1.45113	7.98e-06	0.0794	AAAGAAAGAAAGAAAGAAAGAAAGAA
ENSMUSG00000026163	Sphkap	1	83254139	83408200	ENSMUST00000160953.7	1769	1794	+	1.45113	7.98e-06	0.0794	AAAGAAAGAAAGAAAGAAAGAAAGAA
ENSMUSG00000026163	Sphkap	1	83254139	83408200	ENSMUST00000160953.7	1773	1798	+	1.45113	7.98e-06	0.0794	AAAGAAAGAAAGAAAGAAAGAAAGAA
ENSMUSG00000026163	Sphkap	1	83254139	83408200	ENSMUST00000160953.7	1798	1823	+	2.86466	5.08e-06	0.0794	AAGAAAAGAAAGAAAGACAGAAAGGA
ENSMUSG00000026163	Sphkap	1	83254139	83408200	ENSMUST00000160953.7	1786	1811	+	-4.31579	4.19e-05	0.15	AAGAAAGAAAGAAAGAAAAGAAAGAA
ENSMUSG00000026163	Sphkap	1	83254139	83408200	ENSMUST00000160953.7	1765	1790	+	1.45113	7.98e-06	0.0794	AAAGAAAGAAAGAAAGAAAGAAAGAA
ENSMUSG00000026163	Sphkap	1	83254139	83408200	ENSMUST00000160953.7	1761	1786	+	1.45113	7.98e-06	0.0794	AAAGAAAGAAAGAAAGAAAGAAAGAA
ENSMUSG00000026163	Sphkap	1	83254139	83408200	ENSMUST00000160953.7	1757	1782	+	1.45113	7.98e-06	0.0794	AAAGAAAGAAAGAAAGAAAGAAAGAA
ENSMUSG00000026163	Sphkap	1	83254139	83408200	ENSMUST00000160953.7	1753	1778	+	-5.16541	5.32e-05	0.16	GAAGAAAGAAAGAAAGAAAGAAAGAA
ENSMUSG00000026163	Sphkap	1	83254139	83408200	ENSMUST00000160953.7	1802	1827	+	-3.47368	3.22e-05	0.133	AAAGAAAGAAAGACAGAAAGGAATAG
ENSMUSG00000039086	Ss18l1	2	180042509	180070201	ENSMUST00000041126.8	1197	1222	+	-3.15038	2.93e-05	0.125	GAGAAGAAAAGAACAACCTTGAAGAT
ENSMUSG00000068882	Ssb	2	69861562	69871846	ENSMUST00000132186.7	583	608	+	-2.00752	2.03e-05	0.0997	AATGAAAAGAGGAAGAGATGGAAGAG
ENSMUSG00000003992	Ssbp2	13	91460283	91703429	ENSMUST00000004094.14	1713	1738	+	-1.20301	1.6e-05	0.0905	AAAAAAGATGAAGTAGCTTTACACTG
ENSMUSG00000026915	Strbp	2	37483228	37703859	ENSMUST00000028279.9	11296	11321	+	-5.04511	5.17e-05	0.16	CCAAATGGAGGGAAGACATTTGAGTG
ENSMUSG00000026915	Strbp	2	37483228	37703859	ENSMUST00000028279.9	6570	6595	+	0.62406	1e-05	0.0842	AACAAACAAAAAAAAACAACAAACTA
ENSMUSG00000026915	Strbp	2	37483228	37703859	ENSMUST00000028279.9	181	206	+	-1.40602	1.71e-05	0.0939	AACAAACAAAAGAAACCAGTTCTGTG
ENSMUSG00000026915	Strbp	2	37483228	37703859	ENSMUST00000028279.9	9189	9214	+	-7.7594	9.79e-05	0.177	AAGAACAGAAGGTAAGAAGTGTACTG
ENSMUSG00000039629	Strip2	6	29917012	29959681	ENSMUST00000046028.11	2743	2768	+	0.81203	9.59e-06	0.0833	TTAATAAAAAGAAAAACCTGGACTTA
ENSMUSG00000041488	Stx3	19	11775118	11819403	ENSMUST00000047698.13	788	813	+	-5.36842	5.65e-05	0.165	AACAAATTAATGAAAATGTAGAATTG
ENSMUSG00000022340	Sybu	15	44671856	44788063	ENSMUST00000228639.1	3486	3511	+	8.28571	8.87e-07	0.0692	ATTAAAAGAAAGAAAGAAAGAAAGAG
ENSMUSG00000022340	Sybu	15	44671856	44788063	ENSMUST00000228639.1	825	850	+	-5.30827	5.53e-05	0.163	AATAAACATTGATAGACATTAAAATG
ENSMUSG00000022340	Sybu	15	44671856	44788063	ENSMUST00000228639.1	3490	3515	+	2.17293	6.4e-06	0.0794	AAAGAAAGAAAGAAAGAAAGAGAGAG
ENSMUSG00000022340	Sybu	15	44671856	44788063	ENSMUST00000228639.1	1753	1778	+	-4.96992	5.08e-05	0.16	GAAAGGGAAAAAAGAAAACTTAAGTG
ENSMUSG00000022340	Sybu	15	44671856	44788063	ENSMUST00000228639.1	2678	2703	+	-4.48872	4.43e-05	0.154	GCATAAAATAAGTATACACTGTAGTG
ENSMUSG00000022340	Sybu	15	44671856	44788063	ENSMUST00000228639.1	3124	3149	+	-4.2406	4.11e-05	0.149	ATATAAAGCAAGGTAACACTGAACTT
ENSMUSG00000022340	Sybu	15	44671856	44788063	ENSMUST00000228639.1	3494	3519	+	-2.88722	2.67e-05	0.117	AAAGAAAGAAAGAAAGAGAGAGAGAG
ENSMUSG00000009394	Syn2	6	115134902	115282006	ENSMUST00000169345.3	51	76	+	-2.17293	2.14e-05	0.104	AGAAGAGAAAAGAAAGGAAGGCAGGG
ENSMUSG00000009394	Syn2	6	115134902	115282006	ENSMUST00000169345.3	60	85	+	-5.40602	5.7e-05	0.165	AAGAAAGGAAGGCAGGGAGGGGAGCG
ENSMUSG00000009394	Syn2	6	115134902	115282006	ENSMUST00000169345.3	56	81	+	6.98496	1.32e-06	0.0692	AGAAAAGAAAGGAAGGCAGGGAGGGG
ENSMUSG00000009394	Syn2	6	115134902	115282006	ENSMUST00000169345.3	47	72	+	-4.58647	4.56e-05	0.155	AAAAAGAAGAGAAAAGAAAGGAAGGC
ENSMUSG00000071234	Syndig1l	12	84677277	84698831	ENSMUST00000095550.3	632	657	+	-0.81203	1.45e-05	0.088	AAAAAAAAAAAAAAAAAAAAAAAAGG
ENSMUSG00000071234	Syndig1l	12	84677277	84698831	ENSMUST00000095550.3	633	658	+	-0.81203	1.45e-05	0.088	AAAAAAAAAAAAAAAAAAAAAAAGGC
ENSMUSG00000071234	Syndig1l	12	84677277	84698831	ENSMUST00000095550.3	638	663	+	-7.54887	9.3e-05	0.177	AAAAAAAAAAAAAAAAAAGGCAGATA
ENSMUSG00000071234	Syndig1l	12	84677277	84698831	ENSMUST00000095550.3	634	659	+	-7.42857	9.08e-05	0.177	AAAAAAAAAAAAAAAAAAAAAAGGCA
ENSMUSG00000071234	Syndig1l	12	84677277	84698831	ENSMUST00000095550.3	631	656	+	-0.81203	1.45e-05	0.088	AAAAAAAAAAAAAAAAAAAAAAAAAG
ENSMUSG00000071234	Syndig1l	12	84677277	84698831	ENSMUST00000095550.3	637	662	+	0.0300752	1.17e-05	0.0874	AAAAAAAAAAAAAAAAAAAGGCAGAT
ENSMUSG00000071234	Syndig1l	12	84677277	84698831	ENSMUST00000095550.3	641	666	+	-1.09774	1.55e-05	0.0898	AAAAAAAAAAAAAAAGGCAGATACAG
ENSMUSG00000096054	Syne1	10	5020917	5551482	ENSMUST00000041639.6	936	961	+	-6.6391	7.6e-05	0.172	AAAAAAAAAAACTGAACTATAAAATA
ENSMUSG00000044912	Syt16	12	73997661	74273267	ENSMUST00000221220.1	724	749	+	-0.195489	1.23e-05	0.0874	AAGAAGAAGAGGAAAACCTAGAAGAT
ENSMUSG00000044912	Syt16	12	73997661	74273267	ENSMUST00000221220.1	4878	4903	+	-5.7218	6.18e-05	0.166	GTGGGAGGTGGGAAGACCGGGAAGTG
ENSMUSG00000026452	Syt2	1	134646677	134762593	ENSMUST00000121990.1	4247	4272	+	-5.50376	5.87e-05	0.166	GAATAAACTGAAAAAGCCATAAAGGG
ENSMUSG00000024261	Syt4	18	31437808	31447406	ENSMUST00000025110.4	996	1021	+	-3.57143	3.34e-05	0.134	AGAAAAGAAAAGAAAAAAAAAACTTG
ENSMUSG00000024261	Syt4	18	31437808	31447406	ENSMUST00000025110.4	1995	2020	+	3.15038	4.53e-06	0.0794	AAAAAAGAGAGAAACACAAGAAAGGA
ENSMUSG00000024261	Syt4	18	31437808	31447406	ENSMUST00000025110.4	1994	2019	+	-7.55639	9.31e-05	0.177	AAAAAAAGAGAGAAACACAAGAAAGG
ENSMUSG00000024261	Syt4	18	31437808	31447406	ENSMUST00000025110.4	1993	2018	+	-5.03008	5.15e-05	0.16	AAAAAAAAGAGAGAAACACAAGAAAG
ENSMUSG00000024261	Syt4	18	31437808	31447406	ENSMUST00000025110.4	1001	1026	+	-4	3.84e-05	0.146	AGAAAAGAAAAAAAAAACTTGTGGAA
ENSMUSG00000024743	Syt7	19	10389090	10453180	ENSMUST00000076968.10	2842	2867	+	-6.7218	7.71e-05	0.172	AAAAAAAAAAAAAAAAAAAGCCAAGG
ENSMUSG00000024743	Syt7	19	10389090	10453180	ENSMUST00000076968.10	2846	2871	+	-4.32331	4.2e-05	0.15	AAAAAAAAAAAAAAAGCCAAGGGGAC
ENSMUSG00000024743	Syt7	19	10389090	10453180	ENSMUST00000076968.10	2843	2868	+	1.46617	7.95e-06	0.0794	AAAAAAAAAAAAAAAAAAGCCAAGGG
ENSMUSG00000024743	Syt7	19	10389090	10453180	ENSMUST00000076968.10	2981	3006	+	-6.56391	7.49e-05	0.172	CACAAAAAAAGAAAAAAAATACAGCA
ENSMUSG00000024743	Syt7	19	10389090	10453180	ENSMUST00000076968.10	2845	2870	+	-7.31579	8.88e-05	0.177	AAAAAAAAAAAAAAAAGCCAAGGGGA
ENSMUSG00000024743	Syt7	19	10389090	10453180	ENSMUST00000076968.10	2984	3009	+	1.84962	7.17e-06	0.0794	AAAAAAAGAAAAAAAATACAGCAAAG
ENSMUSG00000024743	Syt7	19	10389090	10453180	ENSMUST00000076968.10	2838	2863	+	-7.42857	9.08e-05	0.177	AAAGAAAAAAAAAAAAAAAAAAAGCC
ENSMUSG00000024743	Syt7	19	10389090	10453180	ENSMUST00000076968.10	2844	2869	+	0.744361	9.73e-06	0.0833	AAAAAAAAAAAAAAAAAGCCAAGGGG
ENSMUSG00000024743	Syt7	19	10389090	10453180	ENSMUST00000076968.10	2986	3011	+	0.759398	9.71e-06	0.0833	AAAAAGAAAAAAAATACAGCAAAGAG
ENSMUSG00000059187	Tafa1	6	96113154	96657198	ENSMUST00000122120.7	1352	1377	+	-7.77444	9.83e-05	0.177	GTAAAAAACAACAAAAACCTAAAATC
ENSMUSG00000044071	Tafa2	10	123263996	123741204	ENSMUST00000050756.7	902	927	+	3.60902	3.88e-06	0.0794	ATAAAATAAAATAAAACCCGCCAGGG
ENSMUSG00000044071	Tafa2	10	123263996	123741204	ENSMUST00000050756.7	2030	2055	+	-6.20301	6.9e-05	0.17	ATCAATAGAAAAAAATAAATGAAATT
ENSMUSG00000039033	Tasp1	2	139833480	140066805	ENSMUST00000046656.8	574	599	+	-6.3985	7.22e-05	0.172	AATTAAAGTCAGAACGTTTTAAAGTA
ENSMUSG00000020115	Tbk1	10	121546455	121586787	ENSMUST00000219400.1	2323	2348	+	-2.05263	2.05e-05	0.1	AATTATTGAGCAAAAACTTTAAAGTG
ENSMUSG00000050052	Tdrp	8	13952008	13975032	ENSMUST00000062613.11	742	767	+	-6.90977	8.05e-05	0.175	TAAACTGTGGATAAAACACTGAAGTG
ENSMUSG00000033430	Terf2ip	8	112011398	112020528	ENSMUST00000052138.10	2240	2265	+	-5.36842	5.65e-05	0.165	AAAAAAAAAAAGACAGCTACAGTGTA
ENSMUSG00000033430	Terf2ip	8	112011398	112020528	ENSMUST00000052138.10	2191	2216	+	-7.7218	9.66e-05	0.177	ATAAATAAAAATAAATCTTTAAAAAA
ENSMUSG00000033430	Terf2ip	8	112011398	112020528	ENSMUST00000052138.10	2212	2237	+	-4.40602	4.33e-05	0.152	AAAAAAAAAAGAAAATTCTGTTTTTG
ENSMUSG00000033430	Terf2ip	8	112011398	112020528	ENSMUST00000052138.10	2238	2263	+	-6.08271	6.7e-05	0.168	TAAAAAAAAAAAAGACAGCTACAGTG
ENSMUSG00000033430	Terf2ip	8	112011398	112020528	ENSMUST00000052138.10	2211	2236	+	0.233083	1.12e-05	0.0874	AAAAAAAAAAAGAAAATTCTGTTTTT
ENSMUSG00000028145	Them4	3	94310089	94332540	ENSMUST00000049822.9	315	340	+	-0.195489	1.23e-05	0.0874	GACAAAAAGAAAAAAAGACTGTATTG
ENSMUSG00000002489	Tiam1	16	89787111	90143769	ENSMUST00000114124.8	1815	1840	+	-2.24812	2.19e-05	0.104	ATCGGAAAAAAAAATACTGGAAAGTC
ENSMUSG00000021079	Timm9	12	71123173	71136684	ENSMUST00000221797.1	810	835	+	-4.25564	4.13e-05	0.15	CAGAAAAAAAGGAGAAAAATAAAGTT
ENSMUSG00000021079	Timm9	12	71123173	71136684	ENSMUST00000221797.1	1179	1204	+	-5.71429	6.16e-05	0.166	TACATATGAGGGAGAACCTGGAAGAT
ENSMUSG00000091537	Tma7	9	109074568	109082587	ENSMUST00000167504.2	218	243	+	-1.02256	1.53e-05	0.0895	TAAAAAAAAAAAAAATGAATAAAGTA
ENSMUSG00000030614	Tmem126b	7	90467438	90476001	ENSMUST00000032843.8	440	465	+	-7.52632	9.27e-05	0.177	TCCTAAGAAAGGAAAATATAGAAGGT
ENSMUSG00000043388	Tmem130	5	144735915	144761818	ENSMUST00000061446.7	447	472	+	-5.35338	5.63e-05	0.165	AGCAAGGAAGGGCACACGTGGAGGTG
ENSMUSG00000022537	Tmem44	16	30511855	30550842	ENSMUST00000089775.10	2682	2707	+	-1.89474	1.95e-05	0.0968	AAACAAACAAACAAAACCAGGGACTG
ENSMUSG00000022537	Tmem44	16	30511855	30550842	ENSMUST00000089775.10	2415	2440	+	2.23308	6.29e-06	0.0794	AGTCAAGGAAGGAGAAACCTGACGTG
ENSMUSG00000022537	Tmem44	16	30511855	30550842	ENSMUST00000089775.10	3157	3182	+	-7.78947	9.87e-05	0.177	ATGAGATATATGAGACCCTGGAGGTG
ENSMUSG00000022537	Tmem44	16	30511855	30550842	ENSMUST00000089775.10	3684	3709	+	-5.96241	6.51e-05	0.166	AACAAAAAACAACCACCACTGAGCTG
ENSMUSG00000045377	Tmem88	11	69396519	69398234	ENSMUST00000050140.5	352	377	+	-0.150376	1.22e-05	0.0874	AAATAATAAAAAAAAATTATAAAATG
ENSMUSG00000035614	Togaram1	12	64965804	65022573	ENSMUST00000066296.8	825	850	+	-5.76692	6.23e-05	0.166	AAAGAAGAAAAGGAATGTTTAAAATA
ENSMUSG00000035614	Togaram1	12	64965804	65022573	ENSMUST00000066296.8	605	630	+	-4.37594	4.28e-05	0.151	ACCAAAGCTTAGAAAACATTAAACAT
ENSMUSG00000041763	Tpp2	1	43933647	44003000	ENSMUST00000190207.1	737	762	+	-7.09774	8.42e-05	0.177	ATTTCAAAACAGAAAATTTTATAGTG
ENSMUSG00000041763	Tpp2	1	43933647	44003000	ENSMUST00000190207.1	715	740	+	-4.07519	3.93e-05	0.147	AAAATAAGAACCAAAACTTTACATTT
ENSMUSG00000021071	Trim9	12	70244533	70347614	ENSMUST00000167755.2	1402	1427	+	-3.20301	2.98e-05	0.126	AATAAAAAGAGAAAATTTATGAAGTA
ENSMUSG00000038984	Tspyl5	15	33683875	33687884	ENSMUST00000042021.4	1179	1204	+	-5.37594	5.66e-05	0.165	AAAGAAAAACCAAAAGGTCTCAAGAG
ENSMUSG00000038984	Tspyl5	15	33683875	33687884	ENSMUST00000042021.4	2674	2699	+	1.54887	7.77e-06	0.0794	AAAAAAATAAAAAAAATATTCTTGTG
ENSMUSG00000028251	Tstd3	4	21757382	21767212	ENSMUST00000029915.5	984	1009	+	-1.4812	1.74e-05	0.095	TTCAAAACTAATAAAATATTAAAGTT
ENSMUSG00000042298	Ttc19	11	62281473	62328451	ENSMUST00000050646.12	1614	1639	+	-4.70677	4.74e-05	0.158	ATCACAGCATATGAAAATTTAAAGTG
ENSMUSG00000027394	Ttl	2	129065942	129096283	ENSMUST00000035812.13	2496	2521	+	-7.00752	8.22e-05	0.176	CTCAAAAAAAAATACTCTTTGAAGCA
ENSMUSG00000027394	Ttl	2	129065942	129096283	ENSMUST00000035812.13	677	702	+	-6.80451	7.87e-05	0.174	AAAACAAAAACAAAACCATGATAATC
ENSMUSG00000051786	Tubgcp6	15	89098357	89123112	ENSMUST00000109353.8	634	659	+	-7.18045	8.61e-05	0.177	ATGAGAGGAAGGGATAACAGATAGTG
ENSMUSG00000038393	Txnip	3	96557957	96561883	ENSMUST00000074519.12	1301	1326	+	-7.24812	8.73e-05	0.177	GTAAAAAAAAATAAAGTTTTTTAATG
ENSMUSG00000048495	Tyw5	1	57388237	57407101	ENSMUST00000079998.12	628	653	+	-7.71429	9.64e-05	0.177	ATAACAAGATAAAAAATTTAAAGATG
ENSMUSG00000048495	Tyw5	1	57388237	57407101	ENSMUST00000079998.12	660	685	+	-3	2.79e-05	0.121	AAAATAGGAAAGATAAGTCTGAGATT
ENSMUSG00000028243	Ubxn2b	4	6191098	6221688	ENSMUST00000029907.5	3389	3414	+	-6.59398	7.53e-05	0.172	CAAAAAAAAAAAAAAAGCAAAAATGG
ENSMUSG00000028243	Ubxn2b	4	6191098	6221688	ENSMUST00000029907.5	3390	3415	+	-0.233083	1.24e-05	0.0874	AAAAAAAAAAAAAAAGCAAAAATGGA
ENSMUSG00000028243	Ubxn2b	4	6191098	6221688	ENSMUST00000029907.5	3038	3063	+	-2.60902	2.44e-05	0.111	AAACAAAACAGGAAAACACATAATTT
ENSMUSG00000028243	Ubxn2b	4	6191098	6221688	ENSMUST00000029907.5	3394	3419	+	-6.30075	7.06e-05	0.172	AAAAAAAAAAAGCAAAAATGGAGAAA
ENSMUSG00000028243	Ubxn2b	4	6191098	6221688	ENSMUST00000029907.5	4472	4497	+	-5.51128	5.88e-05	0.166	CTTAAAGGAAGGACATCAAGGAAGAA
ENSMUSG00000028243	Ubxn2b	4	6191098	6221688	ENSMUST00000029907.5	3388	3413	+	-6.1203	6.74e-05	0.168	GCAAAAAAAAAAAAAAAGCAAAAATG
ENSMUSG00000052906	Ubxn8	8	33619586	33641967	ENSMUST00000095349.5	175	200	+	-7.26316	8.75e-05	0.177	AAAAGAGTAAGACAGACCTGGATGCA
ENSMUSG00000035337	Uchl4	9	64235201	64236362	ENSMUST00000039011.3	348	373	+	-6.80451	7.87e-05	0.174	AACAAACAAAAAAGAATAATAATCTG
ENSMUSG00000089862	Umad1	6	8259288	8459470	ENSMUST00000159335.7	1298	1323	+	5.69925	1.89e-06	0.0692	AAAAAAAAAAAAAAAAAAAAAAAGTT
ENSMUSG00000089862	Umad1	6	8259288	8459470	ENSMUST00000159335.7	1296	1321	+	-0.81203	1.45e-05	0.088	AAAAAAAAAAAAAAAAAAAAAAAAAG
ENSMUSG00000089862	Umad1	6	8259288	8459470	ENSMUST00000159335.7	1302	1327	+	-0.210526	1.24e-05	0.0874	AAAAAAAAAAAAAAAAAAAGTTATTG
ENSMUSG00000089862	Umad1	6	8259288	8459470	ENSMUST00000159335.7	1304	1329	+	-7.2406	8.71e-05	0.177	AAAAAAAAAAAAAAAAAGTTATTGAC
ENSMUSG00000034799	Unc13a	8	71624417	71671757	ENSMUST00000030170.14	2689	2714	+	-3.55639	3.32e-05	0.134	CAAAAAACACAGAATCCCTGAAACTG
ENSMUSG00000062151	Unc13c	9	73479422	73968966	ENSMUST00000184666.7	286	311	+	-7.30075	8.84e-05	0.177	AAAAAAAAAAAACAAACAAAAAAACC
ENSMUSG00000062151	Unc13c	9	73479422	73968966	ENSMUST00000184666.7	282	307	+	-5.74436	6.2e-05	0.166	AAAAAAAAAAAAAAAACAAACAAAAA
ENSMUSG00000062151	Unc13c	9	73479422	73968966	ENSMUST00000184666.7	728	753	+	1.64662	7.58e-06	0.0794	AAAAAAAGAAAAAAAATGGTAACCTG
ENSMUSG00000062151	Unc13c	9	73479422	73968966	ENSMUST00000184666.7	985	1010	+	-5.21805	5.42e-05	0.162	GAAAAATGTAAAATAAACTAAAAGTA
ENSMUSG00000055567	Unc80	1	66468367	66699148	ENSMUST00000061620.16	1057	1082	+	-0.315789	1.28e-05	0.088	AAAAAAAAGAATAAAATTTGAAAGGC
ENSMUSG00000055567	Unc80	1	66468367	66699148	ENSMUST00000061620.16	1055	1080	+	-5.54887	5.92e-05	0.166	AAAAAAAAAAGAATAAAATTTGAAAG
ENSMUSG00000055567	Unc80	1	66468367	66699148	ENSMUST00000061620.16	1056	1081	+	-0.593985	1.38e-05	0.088	AAAAAAAAAGAATAAAATTTGAAAGG
ENSMUSG00000047879	Usp14	18	9993066	10045119	ENSMUST00000092096.13	2457	2482	+	8.06767	9.45e-07	0.0692	AAAAAAGAAAAGAAAGGAAGAAAGCT
ENSMUSG00000047879	Usp14	18	9993066	10045119	ENSMUST00000092096.13	2453	2478	+	-5.16541	5.32e-05	0.16	TAATAAAAAAGAAAAGAAAGGAAGAA
ENSMUSG00000047879	Usp14	18	9993066	10045119	ENSMUST00000092096.13	2462	2487	+	-6.93985	8.12e-05	0.175	AGAAAAGAAAGGAAGAAAGCTAACTG
ENSMUSG00000040455	Usp45	4	21767156	21837872	ENSMUST00000137293.7	2548	2573	+	-5.99248	6.54e-05	0.166	ATAGGAATATAGAATACTTTAAAGTT
ENSMUSG00000040455	Usp45	4	21767156	21837872	ENSMUST00000137293.7	345	370	+	-1.15038	1.58e-05	0.0905	ACCCAAAGAATGACAACTTGGAAGCC
ENSMUSG00000040455	Usp45	4	21767156	21837872	ENSMUST00000137293.7	2787	2812	+	3.67669	3.79e-06	0.0794	AGCAAAACAAAGAAAATATTCAGGTG
ENSMUSG00000045210	Vcpip1	1	9718622	9748382	ENSMUST00000057438.6	4958	4983	+	-5.50376	5.87e-05	0.166	AAAATATAGAAAACAGCAGTAAAGTC
ENSMUSG00000045210	Vcpip1	1	9718622	9748382	ENSMUST00000057438.6	3778	3803	+	-1.81955	1.9e-05	0.0957	GTAAAAAAAAAAAAAATTGTGAATTA
ENSMUSG00000049882	Vcpkmt	12	69577628	69583110	ENSMUST00000238220.1	311	336	+	-7.5188	9.25e-05	0.177	CAAACATGATGAAGAATACCGAAGTG
ENSMUSG00000020220	Vps13d	4	144972622	145195005	ENSMUST00000130704.7	2775	2800	+	-7.78195	9.85e-05	0.177	ATAAAAAGCATCATAGCTTCTCAGTG
ENSMUSG00000061559	Wdr61	9	54714735	54734519	ENSMUST00000118771.7	1190	1215	+	-4.90226	5e-05	0.16	ATAAAAACCAAGTAAGGATGGATCTG
ENSMUSG00000018849	Wwc1	11	35838400	35980527	ENSMUST00000018993.6	231	256	+	-1.70677	1.85e-05	0.0952	CAAACAAAAAAACCAGCATTAAAATG
ENSMUSG00000018849	Wwc1	11	35838400	35980527	ENSMUST00000018993.6	403	428	+	-0.421053	1.31e-05	0.088	AATAAAAAAAAAAAAAGTTGTATTTG
ENSMUSG00000041774	Ydjc	16	17144621	17160701	ENSMUST00000232479.1	612	637	+	-3.6015	3.36e-05	0.134	ACAAAACAAAACAAAACCCCAAACTT
ENSMUSG00000041774	Ydjc	16	17144621	17160701	ENSMUST00000232479.1	455	480	+	-5.83459	6.33e-05	0.166	AACAGAAATAGGAAAATATGGCATCA
ENSMUSG00000021244	Ylpm1	12	84996321	85070515	ENSMUST00000164558.7	10	35	+	-6.18797	6.86e-05	0.169	CTAAAAGGAAGCGAGACTGGGAGGCG
ENSMUSG00000022773	Ypel1	16	17069696	17087045	ENSMUST00000035682.15	419	444	+	-7.65414	9.54e-05	0.177	TAACATGGAAGAGAAGCTAGGAAGCA
ENSMUSG00000034059	Ypel4	2	84734058	84738655	ENSMUST00000111643.2	114	139	+	-5.18797	5.36e-05	0.161	AAGAAGGGAAGTACATCATTGAGATG
ENSMUSG00000034059	Ypel4	2	84734058	84738655	ENSMUST00000111643.2	649	674	+	-6.48872	7.38e-05	0.172	TTAAAAAAAATAAAGGATCGGATGGG
ENSMUSG00000022285	Ywhaz	15	36770770	36796929	ENSMUST00000022894.13	1150	1175	+	6.19549	1.65e-06	0.0692	ATAAAAAAAAAAAAACCGCTAATGTA
ENSMUSG00000043542	Zc2hc1a	3	7503483	7553836	ENSMUST00000051064.8	539	564	+	-3.30075	3.06e-05	0.129	AAAGATGAAAAGGAAGACCTGAGGTC
ENSMUSG00000043542	Zc2hc1a	3	7503483	7553836	ENSMUST00000051064.8	531	556	+	-4.89474	4.99e-05	0.16	AAAAAAAAAAAGATGAAAAGGAAGAC
ENSMUSG00000043542	Zc2hc1a	3	7503483	7553836	ENSMUST00000051064.8	526	551	+	-7.80451	9.89e-05	0.177	CCTAAAAAAAAAAAAAGATGAAAAGG
ENSMUSG00000049421	Zfp260	7	30094777	30107622	ENSMUST00000050735.11	1035	1060	+	2.81955	5.19e-06	0.0794	GCAAAAGAAAAAAAATCATCAGAGTG
ENSMUSG00000057894	Zfp329	7	12804977	12818858	ENSMUST00000072222.7	385	410	+	-7.41353	9.05e-05	0.177	TATTATAGAGTCAAAGCTTGGAAGTG
ENSMUSG00000057894	Zfp329	7	12804977	12818858	ENSMUST00000072222.7	3941	3966	+	0.639098	1e-05	0.0842	AAAAAAAAAAAAAAAAAAACCAAGTA
ENSMUSG00000057894	Zfp329	7	12804977	12818858	ENSMUST00000072222.7	3945	3970	+	0.496241	1.04e-05	0.0846	AAAAAAAAAAAAAAACCAAGTAAATA
ENSMUSG00000057894	Zfp329	7	12804977	12818858	ENSMUST00000072222.7	3944	3969	+	-4.77444	4.85e-05	0.159	AAAAAAAAAAAAAAAACCAAGTAAAT
ENSMUSG00000059142	Zfp945	17	22846697	22867134	ENSMUST00000160457.9	1514	1539	+	-5.78195	6.25e-05	0.166	GAAAAAAAAGGAAGAACTTCAGAGTA
ENSMUSG00000032368	Zic1	9	91358058	91365810	ENSMUST00000034927.12	982	1007	+	13.0451	1.46e-07	0.0658	AAAAAAAAAAAAAAAACTCGTATGTA
ENSMUSG00000061524	Zic2	14	122475435	122479852	ENSMUST00000075888.5	227	252	+	-7.80451	9.89e-05	0.177	AAACATAAAAAAAAATTAAGAAAGTA
ENSMUSG00000036972	Zic4	9	91362413	91389348	ENSMUST00000066384.6	1539	1564	+	-5.12782	5.29e-05	0.16	AGAAAAGAAAAAAGACCCCTACACTC
ENSMUSG00000036972	Zic4	9	91362413	91389348	ENSMUST00000066384.6	1631	1656	+	-5.60902	6.02e-05	0.166	AAAAAAAAAAAAAAAACAAAGCAAAA
ENSMUSG00000036972	Zic4	9	91362413	91389348	ENSMUST00000066384.6	1331	1356	+	-7.34586	8.92e-05	0.177	TATTGAGCTGAGAAATCTTTGAAGTG
ENSMUSG00000036972	Zic4	9	91362413	91389348	ENSMUST00000066384.6	1628	1653	+	-0.81203	1.45e-05	0.088	AAAAAAAAAAAAAAAAAAACAAAGCA
ENSMUSG00000030967	Zranb1	7	132931142	132986391	ENSMUST00000106157.7	209	234	+	0.879699	9.44e-06	0.0833	AAAAAAGAAAAAAAAAAAAAAAAAAG
ENSMUSG00000030967	Zranb1	7	132931142	132986391	ENSMUST00000106157.7	246	271	+	-7.24812	8.73e-05	0.177	AAAGAAAAAAGAAAAAAAATAACCTA
ENSMUSG00000030967	Zranb1	7	132931142	132986391	ENSMUST00000106157.7	614	639	+	-1.6391	1.81e-05	0.0951	AAAAAAAAAAAAAAAAAAAAAAAATC
ENSMUSG00000030967	Zranb1	7	132931142	132986391	ENSMUST00000106157.7	627	652	+	-4.03759	3.89e-05	0.146	AAAAAAAAAAATCAAACCCTTAGGAA
ENSMUSG00000030967	Zranb1	7	132931142	132986391	ENSMUST00000106157.7	211	236	+	-7.42857	9.08e-05	0.177	AAAAGAAAAAAAAAAAAAAAAAAGAA
ENSMUSG00000030967	Zranb1	7	132931142	132986391	ENSMUST00000106157.7	216	241	+	-0.81203	1.45e-05	0.088	AAAAAAAAAAAAAAAAAAGAAAAGAA
ENSMUSG00000030967	Zranb1	7	132931142	132986391	ENSMUST00000106157.7	233	258	+	-5.15789	5.32e-05	0.16	AGAAAAGAAAAAAAAAGAAAAAAGAA
ENSMUSG00000030967	Zranb1	7	132931142	132986391	ENSMUST00000106157.7	620	645	+	-2.21805	2.17e-05	0.104	AAAAAAAAAAAAAAAAAATCAAACCC
ENSMUSG00000030967	Zranb1	7	132931142	132986391	ENSMUST00000106157.7	214	239	+	-5.15789	5.32e-05	0.16	AGAAAAAAAAAAAAAAAAAAGAAAAG
ENSMUSG00000030967	Zranb1	7	132931142	132986391	ENSMUST00000106157.7	619	644	+	-7.2782	8.79e-05	0.177	AAAAAAAAAAAAAAAAAAATCAAACC
ENSMUSG00000030967	Zranb1	7	132931142	132986391	ENSMUST00000106157.7	223	248	+	-6.45865	7.33e-05	0.172	AAAAAAAAAAAGAAAAGAAAAAAAAA
ENSMUSG00000030967	Zranb1	7	132931142	132986391	ENSMUST00000106157.7	219	244	+	-6.72932	7.72e-05	0.172	AAAAAAAAAAAAAAAGAAAAGAAAAA
ENSMUSG00000030967	Zranb1	7	132931142	132986391	ENSMUST00000106157.7	224	249	+	0.609023	1.01e-05	0.0842	AAAAAAAAAAGAAAAGAAAAAAAAAG
ENSMUSG00000030967	Zranb1	7	132931142	132986391	ENSMUST00000106157.7	250	275	+	-5.15038	5.31e-05	0.16	AAAAAAGAAAAAAAATAACCTAATTT
