# Supplementary material for: Identification of 3′ UTR motifs required for mRNA localization to myelin sheaths in vivo
Source: PLoS Biol. 2021 Jan 13;19(1):e3001053. doi: 10.1371/journal.pbio.3001053 (PMC7837478; doi:10.1371/journal.pbio.3001053)
Supplement: S8 Table — (XLSX) [file pbio.3001053.s008.xlsx]

## Sheet: Sheet1
Supplement Table 8 - Gene Ontolog list of terms associated with Figure 8F. GO terms filtered by statistical signifance of False Discovery Rate in column M
Category	Term	Count	%	PValue	Genes	List Total	Pop Hits	Pop Total	Fold Enrichment	Bonferroni	Benjamini	FDR
UP_KEYWORDS	Phosphoprotein	902	48.7041	1.45243e-51	ENSMUSG00000002658, ENSMUSG00000037958, ENSMUSG00000032777, ENSMUSG00000019775, ENSMUSG00000032504, ENSMUSG00000032503, ENSMUSG00000019370, ENSMUSG00000035181, ENSMUSG00000026259, ENSMUSG00000091971, ENSMUSG00000060639, ENSMUSG00000040446, ENSMUSG00000042032, ENSMUSG00000035805, ENSMUSG00000040430, ENSMUSG00000045573, ENSMUSG00000019761, ENSMUSG00000020115, ENSMUSG00000053398, ENSMUSG00000040048,…	1800	7617	22680	1.49208	6.11471e-49	6.11471e-49	2.04093e-48
UP_KEYWORDS	Acetylation	435	23.4881	3.07272e-35	ENSMUSG00000002658, ENSMUSG00000037916, ENSMUSG00000037958, ENSMUSG00000038690, ENSMUSG00000054237, ENSMUSG00000032504, ENSMUSG00000019370, ENSMUSG00000032503, ENSMUSG00000091971, ENSMUSG00000022956, ENSMUSG00000060639, ENSMUSG00000038412, ENSMUSG00000040446, ENSMUSG00000033475, ENSMUSG00000030533, ENSMUSG00000048967, ENSMUSG00000026260, ENSMUSG00000032637, ENSMUSG00000053398, ENSMUSG00000039163,…	1800	3125	22680	1.75392	1.29362e-32	6.46808e-33	4.31776e-32
UP_KEYWORDS	Mitochondrion	202	10.9071	1.02411e-32	ENSMUSG00000037916, ENSMUSG00000031781, ENSMUSG00000019774, ENSMUSG00000050856, ENSMUSG00000038690, ENSMUSG00000025204, ENSMUSG00000006057, ENSMUSG00000050323, ENSMUSG00000022956, ENSMUSG00000022789, ENSMUSG00000038412, ENSMUSG00000025488, ENSMUSG00000033475, ENSMUSG00000025208, ENSMUSG00000025486, ENSMUSG00000049225, ENSMUSG00000059734, ENSMUSG00000048967, ENSMUSG00000044018, ENSMUSG00000026260,…	1800	1058	22680	2.40567	4.31148e-30	1.43716e-30	1.43906e-29
GOTERM_CC_DIRECT	GO:0005739~mitochondrion	284	15.3348	1.92941e-29	ENSMUSG00000037916, ENSMUSG00000031781, ENSMUSG00000019774, ENSMUSG00000038690, ENSMUSG00000050856, ENSMUSG00000025204, ENSMUSG00000006057, ENSMUSG00000027457, ENSMUSG00000050323, ENSMUSG00000091971, ENSMUSG00000022956, ENSMUSG00000022789, ENSMUSG00000038412, ENSMUSG00000025488, ENSMUSG00000042032, ENSMUSG00000033475, ENSMUSG00000025486, ENSMUSG00000025208, ENSMUSG00000049225, ENSMUSG00000059734,…	1677	1721	19662	1.93478	1.53002e-26	1.53002e-26	2.95823e-26
UP_KEYWORDS	Mitochondrion inner membrane	82	4.42765	8.75774e-29	ENSMUSG00000025968, ENSMUSG00000022450, ENSMUSG00000037916, ENSMUSG00000018677, ENSMUSG00000107283, ENSMUSG00000023452, ENSMUSG00000017188, ENSMUSG00000050856, ENSMUSG00000038690, ENSMUSG00000031974, ENSMUSG00000025204, ENSMUSG00000038717, ENSMUSG00000021079, ENSMUSG00000005981, ENSMUSG00000027199, ENSMUSG00000028982, ENSMUSG00000020744, ENSMUSG00000050323, ENSMUSG00000030785, ENSMUSG00000028648,…	1800	254	22680	4.06772	3.68701e-26	9.21752e-27	1.23063e-25
GOTERM_CC_DIRECT	GO:0016020~membrane	805	43.4665	4.38575e-28	ENSMUSG00000019775, ENSMUSG00000032777, ENSMUSG00000035189, ENSMUSG00000025204, ENSMUSG00000032507, ENSMUSG00000032504, ENSMUSG00000016194, ENSMUSG00000006057, ENSMUSG00000026259, ENSMUSG00000046378, ENSMUSG00000060639, ENSMUSG00000025488, ENSMUSG00000033475, ENSMUSG00000027316, ENSMUSG00000025486, ENSMUSG00000059734, ENSMUSG00000035805, ENSMUSG00000019761, ENSMUSG00000037949, ENSMUSG00000040048,…	1677	6998	19662	1.3487	3.4779e-25	1.73895e-25	6.72437e-25
GOTERM_CC_DIRECT	GO:0005743~mitochondrial inner membrane	104	5.61555	1.5993e-26	ENSMUSG00000022450, ENSMUSG00000037916, ENSMUSG00000025968, ENSMUSG00000023452, ENSMUSG00000017188, ENSMUSG00000050856, ENSMUSG00000038690, ENSMUSG00000031974, ENSMUSG00000025204, ENSMUSG00000038717, ENSMUSG00000021079, ENSMUSG00000027199, ENSMUSG00000028982, ENSMUSG00000006057, ENSMUSG00000050323, ENSMUSG00000028648, ENSMUSG00000018574, ENSMUSG00000022956, ENSMUSG00000044894, ENSMUSG00000038412,…	1677	387	19662	3.15077	1.26824e-23	4.22748e-24	2.4521e-23
UP_KEYWORDS	Transport	281	15.1728	5.36034e-26	ENSMUSG00000037916, ENSMUSG00000004319, ENSMUSG00000035189, ENSMUSG00000038690, ENSMUSG00000050856, ENSMUSG00000025204, ENSMUSG00000032504, ENSMUSG00000006057, ENSMUSG00000022956, ENSMUSG00000038412, ENSMUSG00000033475, ENSMUSG00000034187, ENSMUSG00000021124, ENSMUSG00000040430, ENSMUSG00000059734, ENSMUSG00000035805, ENSMUSG00000048967, ENSMUSG00000026260, ENSMUSG00000025781, ENSMUSG00000040048,…	1800	1901	22680	1.86249	2.2567e-23	4.5134e-24	7.53229e-23
GOTERM_BP_DIRECT	GO:0006810~transport	278	15.0108	1.70558e-23	ENSMUSG00000037916, ENSMUSG00000004319, ENSMUSG00000035189, ENSMUSG00000038690, ENSMUSG00000050856, ENSMUSG00000025204, ENSMUSG00000032504, ENSMUSG00000006057, ENSMUSG00000022956, ENSMUSG00000038412, ENSMUSG00000033475, ENSMUSG00000034187, ENSMUSG00000021124, ENSMUSG00000040430, ENSMUSG00000059734, ENSMUSG00000035805, ENSMUSG00000026260, ENSMUSG00000025781, ENSMUSG00000040048, ENSMUSG00000024357,…	1545	1822	18082	1.78572	7.12591e-20	7.12591e-20	3.18444e-20
UP_KEYWORDS	Cytoplasm	508	27.4298	1.84497e-21	ENSMUSG00000024268, ENSMUSG00000019775, ENSMUSG00000032504, ENSMUSG00000019370, ENSMUSG00000032503, ENSMUSG00000026259, ENSMUSG00000091971, ENSMUSG00000003271, ENSMUSG00000010086, ENSMUSG00000019979, ENSMUSG00000053693, ENSMUSG00000025486, ENSMUSG00000040430, ENSMUSG00000035805, ENSMUSG00000030533, ENSMUSG00000072872, ENSMUSG00000032637, ENSMUSG00000020115, ENSMUSG00000039166, ENSMUSG00000041571,…	1800	4404	22680	1.45341	7.76734e-19	1.29456e-19	2.59254e-18
UP_KEYWORDS	Transit peptide	105	5.66955	1.25372e-19	ENSMUSG00000022706, ENSMUSG00000037916, ENSMUSG00000025968, ENSMUSG00000019774, ENSMUSG00000023452, ENSMUSG00000029433, ENSMUSG00000031974, ENSMUSG00000025204, ENSMUSG00000018770, ENSMUSG00000027199, ENSMUSG00000020079, ENSMUSG00000006057, ENSMUSG00000050323, ENSMUSG00000018574, ENSMUSG00000022956, ENSMUSG00000034932, ENSMUSG00000025488, ENSMUSG00000020477, ENSMUSG00000030316, ENSMUSG00000025208,…	1800	510	22680	2.59412	5.27818e-17	7.54026e-18	1.76172e-16
UP_KEYWORDS	Respiratory chain	30	1.61987	2.73666e-16	ENSMUSG00000025968, ENSMUSG00000063882, ENSMUSG00000022450, ENSMUSG00000037916, ENSMUSG00000029632, ENSMUSG00000025204, ENSMUSG00000036199, ENSMUSG00000021606, ENSMUSG00000022820, ENSMUSG00000028648, ENSMUSG00000044894, ENSMUSG00000038412, ENSMUSG00000021764, ENSMUSG00000059534, ENSMUSG00000023089, ENSMUSG00000024099, ENSMUSG00000059734, ENSMUSG00000048967, ENSMUSG00000026260, ENSMUSG00000014294,…	1800	62	22680	6.09677	9.34808e-14	1.16573e-14	3.10862e-13
UP_KEYWORDS	Electron transport	39	2.10583	6.43227e-16	ENSMUSG00000037916, ENSMUSG00000025968, ENSMUSG00000063882, ENSMUSG00000022450, ENSMUSG00000029632, ENSMUSG00000024583, ENSMUSG00000025204, ENSMUSG00000036199, ENSMUSG00000028367, ENSMUSG00000005354, ENSMUSG00000021606, ENSMUSG00000022820, ENSMUSG00000019590, ENSMUSG00000028648, ENSMUSG00000000171, ENSMUSG00000044894, ENSMUSG00000038412, ENSMUSG00000021764, ENSMUSG00000059534, ENSMUSG00000023089,…	1800	107	22680	4.59252	2.80442e-13	3.11973e-14	9.32587e-13
GOTERM_CC_DIRECT	GO:0070469~respiratory chain	28	1.51188	2.12083e-14	ENSMUSG00000025968, ENSMUSG00000063882, ENSMUSG00000022450, ENSMUSG00000037916, ENSMUSG00000029632, ENSMUSG00000025204, ENSMUSG00000021606, ENSMUSG00000028648, ENSMUSG00000044894, ENSMUSG00000038412, ENSMUSG00000021764, ENSMUSG00000059534, ENSMUSG00000023089, ENSMUSG00000024099, ENSMUSG00000059734, ENSMUSG00000026260, ENSMUSG00000014294, ENSMUSG00000020163, ENSMUSG00000063694, ENSMUSG00000040048,…	1677	58	19662	5.66011	1.68158e-11	4.20397e-12	3.25073e-11
UP_KEYWORDS	Synapse	73	3.94168	1.30556e-13	ENSMUSG00000036078, ENSMUSG00000040380, ENSMUSG00000021071, ENSMUSG00000026121, ENSMUSG00000019775, ENSMUSG00000041670, ENSMUSG00000024873, ENSMUSG00000045114, ENSMUSG00000017978, ENSMUSG00000041268, ENSMUSG00000040722, ENSMUSG00000024261, ENSMUSG00000062995, ENSMUSG00000035109, ENSMUSG00000027457, ENSMUSG00000020436, ENSMUSG00000041263, ENSMUSG00000022789, ENSMUSG00000039809, ENSMUSG00000051790,…	1800	357	22680	2.57647	5.49667e-11	5.49671e-12	1.83464e-10
GOTERM_CC_DIRECT	GO:0005829~cytosol	241	13.013	1.54285e-13	ENSMUSG00000001518, ENSMUSG00000032504, ENSMUSG00000025104, ENSMUSG00000001120, ENSMUSG00000019370, ENSMUSG00000026259, ENSMUSG00000015961, ENSMUSG00000091971, ENSMUSG00000002797, ENSMUSG00000036438, ENSMUSG00000022789, ENSMUSG00000019979, ENSMUSG00000021124, ENSMUSG00000029167, ENSMUSG00000020115, ENSMUSG00000054855, ENSMUSG00000030122, ENSMUSG00000039166, ENSMUSG00000057342, ENSMUSG00000041879,…	1677	1784	19662	1.58386	1.22377e-10	2.44753e-11	2.36611e-10
GOTERM_CC_DIRECT	GO:0005737~cytoplasm	703	37.959	2.05559e-13	ENSMUSG00000024268, ENSMUSG00000051980, ENSMUSG00000019775, ENSMUSG00000019774, ENSMUSG00000025104, ENSMUSG00000032504, ENSMUSG00000016194, ENSMUSG00000019370, ENSMUSG00000032503, ENSMUSG00000026259, ENSMUSG00000091971, ENSMUSG00000027457, ENSMUSG00000003271, ENSMUSG00000020262, ENSMUSG00000010086, ENSMUSG00000019979, ENSMUSG00000053693, ENSMUSG00000025486, ENSMUSG00000040430, ENSMUSG00000035805,…	1677	6631	19662	1.243	1.63051e-10	2.71753e-11	3.15248e-10
GOTERM_CC_DIRECT	GO:0070062~extracellular exosome	327	17.6566	1.86886e-12	ENSMUSG00000048583, ENSMUSG00000038690, ENSMUSG00000001120, ENSMUSG00000032504, ENSMUSG00000019370, ENSMUSG00000015961, ENSMUSG00000021266, ENSMUSG00000002797, ENSMUSG00000003271, ENSMUSG00000022956, ENSMUSG00000060639, ENSMUSG00000036438, ENSMUSG00000019979, ENSMUSG00000042032, ENSMUSG00000025512, ENSMUSG00000027316, ENSMUSG00000034187, ENSMUSG00000019579, ENSMUSG00000048967, ENSMUSG00000019761,…	1677	2674	19662	1.43377	1.48199e-09	2.11713e-10	2.86536e-09
GOTERM_CC_DIRECT	GO:0045202~synapse	92	4.9676	4.72455e-12	ENSMUSG00000036078, ENSMUSG00000040380, ENSMUSG00000021071, ENSMUSG00000026121, ENSMUSG00000004319, ENSMUSG00000019775, ENSMUSG00000041670, ENSMUSG00000045114, ENSMUSG00000024873, ENSMUSG00000047879, ENSMUSG00000017978, ENSMUSG00000024261, ENSMUSG00000041268, ENSMUSG00000040722, ENSMUSG00000020848, ENSMUSG00000062995, ENSMUSG00000034101, ENSMUSG00000035109, ENSMUSG00000027457, ENSMUSG00000020436,…	1677	505	19662	2.13595	3.74657e-09	4.68321e-10	7.24384e-09
GOTERM_CC_DIRECT	GO:0005747~mitochondrial respiratory chain complex I	23	1.2419	4.78697e-12	ENSMUSG00000024099, ENSMUSG00000059734, ENSMUSG00000025968, ENSMUSG00000048967, ENSMUSG00000022450, ENSMUSG00000037916, ENSMUSG00000026260, ENSMUSG00000029632, ENSMUSG00000028964, ENSMUSG00000025204, ENSMUSG00000014294, ENSMUSG00000036199, ENSMUSG00000040048, ENSMUSG00000021606, ENSMUSG00000022820, ENSMUSG00000000399, ENSMUSG00000030869, ENSMUSG00000071014, ENSMUSG00000026895, ENSMUSG00000028648,…	1677	47	19662	5.73753	3.79605e-09	4.21783e-10	7.3395e-09
UP_KEYWORDS	Alternative splicing	495	26.7279	1.05104e-11	ENSMUSG00000024268, ENSMUSG00000051980, ENSMUSG00000032777, ENSMUSG00000001518, ENSMUSG00000035189, ENSMUSG00000032504, ENSMUSG00000025104, ENSMUSG00000029782, ENSMUSG00000032503, ENSMUSG00000035181, ENSMUSG00000028909, ENSMUSG00000026259, ENSMUSG00000027457, ENSMUSG00000003271, ENSMUSG00000020262, ENSMUSG00000046378, ENSMUSG00000010086, ENSMUSG00000019979, ENSMUSG00000042032, ENSMUSG00000025512,…	1800	4779	22680	1.30508	4.42491e-09	4.02265e-10	1.47692e-08
GOTERM_BP_DIRECT	GO:0055114~oxidation-reduction process	109	5.88553	1.10088e-10	ENSMUSG00000022450, ENSMUSG00000037916, ENSMUSG00000025968, ENSMUSG00000025204, ENSMUSG00000066441, ENSMUSG00000027195, ENSMUSG00000001467, ENSMUSG00000016194, ENSMUSG00000028648, ENSMUSG00000018574, ENSMUSG00000046378, ENSMUSG00000044894, ENSMUSG00000038412, ENSMUSG00000021263, ENSMUSG00000037373, ENSMUSG00000059534, ENSMUSG00000059734, ENSMUSG00000026260, ENSMUSG00000024556, ENSMUSG00000053398,…	1545	676	18082	1.88711	4.59947e-07	2.29973e-07	2.05542e-07
UP_KEYWORDS	Protein transport	91	4.91361	4.08808e-10	ENSMUSG00000078974, ENSMUSG00000017978, ENSMUSG00000020375, ENSMUSG00000040722, ENSMUSG00000029434, ENSMUSG00000021079, ENSMUSG00000032504, ENSMUSG00000019173, ENSMUSG00000028096, ENSMUSG00000032180, ENSMUSG00000021824, ENSMUSG00000025035, ENSMUSG00000030082, ENSMUSG00000034203, ENSMUSG00000033475, ENSMUSG00000022365, ENSMUSG00000000743, ENSMUSG00000034187, ENSMUSG00000038456, ENSMUSG00000032733,…	1800	577	22680	1.98718	1.72108e-07	1.43423e-08	5.74452e-07
GOTERM_CC_DIRECT	GO:0005753~mitochondrial proton-transporting ATP synthase complex	13	0.701944	1.61775e-09	ENSMUSG00000071528, ENSMUSG00000022956, ENSMUSG00000038690, ENSMUSG00000021290, ENSMUSG00000050856, ENSMUSG00000022890, ENSMUSG00000054428, ENSMUSG00000038717, ENSMUSG00000025781, ENSMUSG00000016252, ENSMUSG00000034566, ENSMUSG00000000563, ENSMUSG00000006057	1677	18	19662	8.4677	1.28288e-06	1.28288e-07	2.48039e-06
GOTERM_CC_DIRECT	GO:0043209~myelin sheath	44	2.37581	3.18327e-09	ENSMUSG00000025228, ENSMUSG00000025968, ENSMUSG00000020932, ENSMUSG00000040907, ENSMUSG00000016349, ENSMUSG00000024966, ENSMUSG00000032504, ENSMUSG00000004267, ENSMUSG00000026797, ENSMUSG00000024997, ENSMUSG00000000563, ENSMUSG00000026576, ENSMUSG00000037601, ENSMUSG00000027438, ENSMUSG00000022956, ENSMUSG00000051391, ENSMUSG00000039059, ENSMUSG00000026825, ENSMUSG00000034187, ENSMUSG00000024099,…	1677	192	19662	2.68687	2.52433e-06	2.29485e-07	4.88068e-06
UP_KEYWORDS	Cell junction	97	5.23758	4.87637e-09	ENSMUSG00000021071, ENSMUSG00000019775, ENSMUSG00000026121, ENSMUSG00000041670, ENSMUSG00000041268, ENSMUSG00000024261, ENSMUSG00000062995, ENSMUSG00000035109, ENSMUSG00000028909, ENSMUSG00000027457, ENSMUSG00000041263, ENSMUSG00000022789, ENSMUSG00000051790, ENSMUSG00000032589, ENSMUSG00000007783, ENSMUSG00000029420, ENSMUSG00000021279, ENSMUSG00000024812, ENSMUSG00000025889, ENSMUSG00000028771,…	1800	661	22680	1.84902	2.05295e-06	1.57919e-07	6.85222e-06
GOTERM_BP_DIRECT	GO:0015031~protein transport	93	5.0216	1.11356e-08	ENSMUSG00000017978, ENSMUSG00000020375, ENSMUSG00000040722, ENSMUSG00000029434, ENSMUSG00000021079, ENSMUSG00000032504, ENSMUSG00000019173, ENSMUSG00000028096, ENSMUSG00000032180, ENSMUSG00000021824, ENSMUSG00000025035, ENSMUSG00000030082, ENSMUSG00000034203, ENSMUSG00000033475, ENSMUSG00000022365, ENSMUSG00000000743, ENSMUSG00000034187, ENSMUSG00000038456, ENSMUSG00000032733, ENSMUSG00000021038,…	1545	592	18082	1.83857	4.65237e-05	1.55081e-05	2.0791e-05
UP_KEYWORDS	Cytoplasmic vesicle	77	4.15767	1.12415e-08	ENSMUSG00000036078, ENSMUSG00000021071, ENSMUSG00000026121, ENSMUSG00000004319, ENSMUSG00000017978, ENSMUSG00000041268, ENSMUSG00000040722, ENSMUSG00000024261, ENSMUSG00000029434, ENSMUSG00000062995, ENSMUSG00000020538, ENSMUSG00000021824, ENSMUSG00000041263, ENSMUSG00000022789, ENSMUSG00000039781, ENSMUSG00000032733, ENSMUSG00000021038, ENSMUSG00000004961, ENSMUSG00000028789, ENSMUSG00000056515,…	1800	489	22680	1.98405	4.73267e-06	3.38049e-07	1.57965e-05
GOTERM_CC_DIRECT	GO:0030424~axon	66	3.56371	1.54182e-08	ENSMUSG00000056121, ENSMUSG00000051980, ENSMUSG00000024261, ENSMUSG00000023169, ENSMUSG00000020173, ENSMUSG00000066151, ENSMUSG00000021824, ENSMUSG00000020436, ENSMUSG00000005716, ENSMUSG00000023064, ENSMUSG00000025920, ENSMUSG00000027581, ENSMUSG00000031971, ENSMUSG00000042249, ENSMUSG00000028785, ENSMUSG00000039137, ENSMUSG00000032589, ENSMUSG00000037624, ENSMUSG00000028789, ENSMUSG00000022462,…	1677	370	19662	2.0914	1.22265e-05	1.01888e-06	2.36396e-05
UP_KEYWORDS	Methylation	126	6.80346	2.09035e-08	ENSMUSG00000034570, ENSMUSG00000037664, ENSMUSG00000037916, ENSMUSG00000019774, ENSMUSG00000047842, ENSMUSG00000032504, ENSMUSG00000001847, ENSMUSG00000032503, ENSMUSG00000019370, ENSMUSG00000091971, ENSMUSG00000060639, ENSMUSG00000058672, ENSMUSG00000036438, ENSMUSG00000043439, ENSMUSG00000032589, ENSMUSG00000021124, ENSMUSG00000021062, ENSMUSG00000034892, ENSMUSG00000019761, ENSMUSG00000032637,…	1800	960	22680	1.65375	8.80033e-06	5.86691e-07	2.93733e-05
GOTERM_CC_DIRECT	GO:0031410~cytoplasmic vesicle	98	5.29158	2.50186e-08	ENSMUSG00000021071, ENSMUSG00000004319, ENSMUSG00000026121, ENSMUSG00000024261, ENSMUSG00000041268, ENSMUSG00000029434, ENSMUSG00000002459, ENSMUSG00000001847, ENSMUSG00000062995, ENSMUSG00000021824, ENSMUSG00000041263, ENSMUSG00000002458, ENSMUSG00000022789, ENSMUSG00000028789, ENSMUSG00000035805, ENSMUSG00000056515, ENSMUSG00000025582, ENSMUSG00000028373, ENSMUSG00000030849, ENSMUSG00000029428,…	1677	646	19662	1.77864	1.98396e-05	1.52614e-06	3.83593e-05
UP_KEYWORDS	Endoplasmic reticulum	129	6.96544	3.23679e-08	ENSMUSG00000033061, ENSMUSG00000078974, ENSMUSG00000066441, ENSMUSG00000027195, ENSMUSG00000001467, ENSMUSG00000025823, ENSMUSG00000056629, ENSMUSG00000016194, ENSMUSG00000038383, ENSMUSG00000027198, ENSMUSG00000013858, ENSMUSG00000023021, ENSMUSG00000003271, ENSMUSG00000030082, ENSMUSG00000023973, ENSMUSG00000006800, ENSMUSG00000021263, ENSMUSG00000025920, ENSMUSG00000052906, ENSMUSG00000035805,…	1800	997	22680	1.63029	1.36268e-05	8.51679e-07	4.54829e-05
GOTERM_CC_DIRECT	GO:0005783~endoplasmic reticulum	170	9.17927	4.01269e-08	ENSMUSG00000033061, ENSMUSG00000029510, ENSMUSG00000066441, ENSMUSG00000025204, ENSMUSG00000027195, ENSMUSG00000056629, ENSMUSG00000001467, ENSMUSG00000025823, ENSMUSG00000016194, ENSMUSG00000038383, ENSMUSG00000027198, ENSMUSG00000013858, ENSMUSG00000023021, ENSMUSG00000003271, ENSMUSG00000030082, ENSMUSG00000023973, ENSMUSG00000022789, ENSMUSG00000006800, ENSMUSG00000021263, ENSMUSG00000025920,…	1677	1323	19662	1.50655	3.18202e-05	2.2729e-06	6.15239e-05
GOTERM_CC_DIRECT	GO:0000276~mitochondrial proton-transporting ATP synthase complex, coupling factor F(o)	10	0.539957	4.03936e-08	ENSMUSG00000062683, ENSMUSG00000022956, ENSMUSG00000038690, ENSMUSG00000050856, ENSMUSG00000022890, ENSMUSG00000038717, ENSMUSG00000018770, ENSMUSG00000034566, ENSMUSG00000000563, ENSMUSG00000006057	1677	12	19662	9.77042	3.20316e-05	2.13547e-06	6.19328e-05
GOTERM_CC_DIRECT	GO:0030054~cell junction	103	5.56156	1.79357e-07	ENSMUSG00000002658, ENSMUSG00000021071, ENSMUSG00000019775, ENSMUSG00000026121, ENSMUSG00000041670, ENSMUSG00000024261, ENSMUSG00000041268, ENSMUSG00000062995, ENSMUSG00000035109, ENSMUSG00000028909, ENSMUSG00000027457, ENSMUSG00000041263, ENSMUSG00000022789, ENSMUSG00000051790, ENSMUSG00000032589, ENSMUSG00000007783, ENSMUSG00000029420, ENSMUSG00000024812, ENSMUSG00000021279, ENSMUSG00000025889,…	1677	718	19662	1.68193	0.00014222	8.88936e-06	0.000274996
UP_KEYWORDS	CF(0)	9	0.485961	5.71716e-07	ENSMUSG00000062683, ENSMUSG00000038690, ENSMUSG00000050856, ENSMUSG00000022890, ENSMUSG00000038717, ENSMUSG00000018770, ENSMUSG00000034566, ENSMUSG00000000563, ENSMUSG00000006057	1800	12	22680	9.45	0.000240663	1.41583e-05	0.000803365
GOTERM_CC_DIRECT	GO:0008021~synaptic vesicle	30	1.61987	6.12647e-07	ENSMUSG00000021071, ENSMUSG00000026791, ENSMUSG00000004319, ENSMUSG00000017978, ENSMUSG00000041268, ENSMUSG00000040722, ENSMUSG00000024261, ENSMUSG00000021700, ENSMUSG00000000416, ENSMUSG00000042078, ENSMUSG00000026825, ENSMUSG00000041488, ENSMUSG00000021124, ENSMUSG00000030806, ENSMUSG00000027712, ENSMUSG00000030720, ENSMUSG00000029428, ENSMUSG00000025917, ENSMUSG00000026385, ENSMUSG00000025889,…	1677	126	19662	2.79155	0.000485712	2.85778e-05	0.000939326
UP_KEYWORDS	Steroid metabolism	21	1.13391	7.96746e-07	ENSMUSG00000024413, ENSMUSG00000018865, ENSMUSG00000032018, ENSMUSG00000059743, ENSMUSG00000003721, ENSMUSG00000001467, ENSMUSG00000021670, ENSMUSG00000016194, ENSMUSG00000030711, ENSMUSG00000006517, ENSMUSG00000020538, ENSMUSG00000031835, ENSMUSG00000021252, ENSMUSG00000003271, ENSMUSG00000026600, ENSMUSG00000024799, ENSMUSG00000021273, ENSMUSG00000032051, ENSMUSG00000035237, ENSMUSG00000031604,…	1800	74	22680	3.57568	0.000335374	1.86348e-05	0.00111957
GOTERM_BP_DIRECT	GO:0015986~ATP synthesis coupled proton transport	12	0.647948	8.74371e-07	ENSMUSG00000062683, ENSMUSG00000022956, ENSMUSG00000050856, ENSMUSG00000022890, ENSMUSG00000038717, ENSMUSG00000001750, ENSMUSG00000025781, ENSMUSG00000018770, ENSMUSG00000016252, ENSMUSG00000034566, ENSMUSG00000000563, ENSMUSG00000006057	1545	23	18082	6.10621	0.00364646	0.000912864	0.0016325
GOTERM_CC_DIRECT	GO:0045263~proton-transporting ATP synthase complex, coupling factor F(o)	9	0.485961	9.933e-07	ENSMUSG00000062683, ENSMUSG00000038690, ENSMUSG00000050856, ENSMUSG00000022890, ENSMUSG00000038717, ENSMUSG00000018770, ENSMUSG00000034566, ENSMUSG00000000563, ENSMUSG00000006057	1677	12	19662	8.79338	0.000787377	4.37594e-05	0.00152295
UP_KEYWORDS	Endosome	66	3.56371	1.04401e-06	ENSMUSG00000029333, ENSMUSG00000004319, ENSMUSG00000006906, ENSMUSG00000005986, ENSMUSG00000020375, ENSMUSG00000040722, ENSMUSG00000029434, ENSMUSG00000019173, ENSMUSG00000066151, ENSMUSG00000041263, ENSMUSG00000000743, ENSMUSG00000066551, ENSMUSG00000021038, ENSMUSG00000004961, ENSMUSG00000021124, ENSMUSG00000027291, ENSMUSG00000056515, ENSMUSG00000024413, ENSMUSG00000028062, ENSMUSG00000026927,…	1800	443	22680	1.8772	0.00043943	2.31327e-05	0.00146702
UP_KEYWORDS	Lipid metabolism	63	3.40173	1.17491e-06	ENSMUSG00000021036, ENSMUSG00000023452, ENSMUSG00000026675, ENSMUSG00000027195, ENSMUSG00000031545, ENSMUSG00000001467, ENSMUSG00000016194, ENSMUSG00000006517, ENSMUSG00000020538, ENSMUSG00000023021, ENSMUSG00000029545, ENSMUSG00000003271, ENSMUSG00000018574, ENSMUSG00000021263, ENSMUSG00000030316, ENSMUSG00000034088, ENSMUSG00000031604, ENSMUSG00000028944, ENSMUSG00000026925, ENSMUSG00000024413,…	1800	417	22680	1.9036	0.000494517	2.47317e-05	0.00165096
UP_KEYWORDS	Golgi apparatus	97	5.23758	2.3776e-06	ENSMUSG00000033061, ENSMUSG00000062995, ENSMUSG00000027198, ENSMUSG00000056429, ENSMUSG00000021824, ENSMUSG00000041263, ENSMUSG00000043388, ENSMUSG00000022789, ENSMUSG00000006800, ENSMUSG00000027581, ENSMUSG00000034620, ENSMUSG00000028789, ENSMUSG00000056515, ENSMUSG00000042628, ENSMUSG00000032570, ENSMUSG00000030849, ENSMUSG00000051853, ENSMUSG00000025499, ENSMUSG00000024067, ENSMUSG00000030530,…	1800	753	22680	1.62311	0.00100047	4.76642e-05	0.00334093
GOTERM_CC_DIRECT	GO:0005769~early endosome	42	2.26782	2.9506e-06	ENSMUSG00000027534, ENSMUSG00000029333, ENSMUSG00000050732, ENSMUSG00000047037, ENSMUSG00000004319, ENSMUSG00000051355, ENSMUSG00000029434, ENSMUSG00000019173, ENSMUSG00000070939, ENSMUSG00000024997, ENSMUSG00000066151, ENSMUSG00000041263, ENSMUSG00000016664, ENSMUSG00000090247, ENSMUSG00000022365, ENSMUSG00000000743, ENSMUSG00000035629, ENSMUSG00000066551, ENSMUSG00000021038, ENSMUSG00000036840,…	1677	226	19662	2.17889	0.00233709	0.000123141	0.00452386
GOTERM_CC_DIRECT	GO:0005840~ribosome	37	1.99784	3.25618e-06	ENSMUSG00000022706, ENSMUSG00000049960, ENSMUSG00000047215, ENSMUSG00000019235, ENSMUSG00000060036, ENSMUSG00000015672, ENSMUSG00000054312, ENSMUSG00000061787, ENSMUSG00000052962, ENSMUSG00000030612, ENSMUSG00000034932, ENSMUSG00000020477, ENSMUSG00000028622, ENSMUSG00000014551, ENSMUSG00000025208, ENSMUSG00000093674, ENSMUSG00000058600, ENSMUSG00000061474, ENSMUSG00000036850, ENSMUSG00000044018,…	1677	188	19662	2.30748	0.00257882	0.000129099	0.00499235
UP_KEYWORDS	Ion transport	82	4.42765	5.38183e-06	ENSMUSG00000002105, ENSMUSG00000016346, ENSMUSG00000004319, ENSMUSG00000019210, ENSMUSG00000050856, ENSMUSG00000038690, ENSMUSG00000038717, ENSMUSG00000023169, ENSMUSG00000024327, ENSMUSG00000022843, ENSMUSG00000018770, ENSMUSG00000028096, ENSMUSG00000020432, ENSMUSG00000006057, ENSMUSG00000062683, ENSMUSG00000026576, ENSMUSG00000020436, ENSMUSG00000017412, ENSMUSG00000022956, ENSMUSG00000036570,…	1800	619	22680	1.66914	0.00226319	0.000102984	0.00756223
UP_KEYWORDS	Hydrogen ion transport	15	0.809935	5.90542e-06	ENSMUSG00000019210, ENSMUSG00000022890, ENSMUSG00000050856, ENSMUSG00000038690, ENSMUSG00000038717, ENSMUSG00000025781, ENSMUSG00000001750, ENSMUSG00000016252, ENSMUSG00000018770, ENSMUSG00000034566, ENSMUSG00000000563, ENSMUSG00000006057, ENSMUSG00000062683, ENSMUSG00000022956, ENSMUSG00000021114	1800	45	22680	4.2	0.0024831	0.000108089	0.00829791
GOTERM_CC_DIRECT	GO:0005768~endosome	78	4.21166	6.61677e-06	ENSMUSG00000029333, ENSMUSG00000004319, ENSMUSG00000006906, ENSMUSG00000019210, ENSMUSG00000005986, ENSMUSG00000020375, ENSMUSG00000040722, ENSMUSG00000029434, ENSMUSG00000019173, ENSMUSG00000066151, ENSMUSG00000056429, ENSMUSG00000022994, ENSMUSG00000041263, ENSMUSG00000000743, ENSMUSG00000032733, ENSMUSG00000021038, ENSMUSG00000021124, ENSMUSG00000004961, ENSMUSG00000027291, ENSMUSG00000035805,…	1677	544	19662	1.68109	0.00523338	0.000249832	0.0101446
GOTERM_CC_DIRECT	GO:0005794~Golgi apparatus	145	7.82937	8.66229e-06	ENSMUSG00000033061, ENSMUSG00000004319, ENSMUSG00000024261, ENSMUSG00000002459, ENSMUSG00000027968, ENSMUSG00000062995, ENSMUSG00000027198, ENSMUSG00000001844, ENSMUSG00000056429, ENSMUSG00000021824, ENSMUSG00000041263, ENSMUSG00000043388, ENSMUSG00000022789, ENSMUSG00000006800, ENSMUSG00000027581, ENSMUSG00000021124, ENSMUSG00000034620, ENSMUSG00000028789, ENSMUSG00000034891, ENSMUSG00000013539,…	1677	1190	19662	1.42862	0.00684569	0.000312189	0.0132805
GOTERM_CC_DIRECT	GO:0030672~synaptic vesicle membrane	18	0.971922	8.69517e-06	ENSMUSG00000026121, ENSMUSG00000041268, ENSMUSG00000024261, ENSMUSG00000040722, ENSMUSG00000062151, ENSMUSG00000029151, ENSMUSG00000062995, ENSMUSG00000035640, ENSMUSG00000057531, ENSMUSG00000027894, ENSMUSG00000022789, ENSMUSG00000035864, ENSMUSG00000042078, ENSMUSG00000029608, ENSMUSG00000007021, ENSMUSG00000053025, ENSMUSG00000068923, ENSMUSG00000004961	1677	61	19662	3.45969	0.00687159	0.000299751	0.0133309
UP_KEYWORDS	Ribosomal protein	36	1.94384	1.03744e-05	ENSMUSG00000022706, ENSMUSG00000049960, ENSMUSG00000047215, ENSMUSG00000019235, ENSMUSG00000060036, ENSMUSG00000015672, ENSMUSG00000054312, ENSMUSG00000061787, ENSMUSG00000052962, ENSMUSG00000030612, ENSMUSG00000034932, ENSMUSG00000049751, ENSMUSG00000028622, ENSMUSG00000020477, ENSMUSG00000014551, ENSMUSG00000025208, ENSMUSG00000093674, ENSMUSG00000058600, ENSMUSG00000061474, ENSMUSG00000036850,…	1800	203	22680	2.23448	0.00435812	0.000181969	0.014577
GOTERM_CC_DIRECT	GO:0030426~growth cone	32	1.72786	1.04746e-05	ENSMUSG00000036078, ENSMUSG00000033295, ENSMUSG00000034570, ENSMUSG00000048978, ENSMUSG00000004558, ENSMUSG00000019370, ENSMUSG00000034101, ENSMUSG00000026259, ENSMUSG00000066151, ENSMUSG00000036438, ENSMUSG00000034675, ENSMUSG00000055421, ENSMUSG00000027581, ENSMUSG00000002496, ENSMUSG00000039137, ENSMUSG00000041488, ENSMUSG00000059456, ENSMUSG00000034891, ENSMUSG00000039542, ENSMUSG00000028546,…	1677	159	19662	2.35965	0.00827198	0.000346039	0.0160587
GOTERM_CC_DIRECT	GO:0043025~neuronal cell body	76	4.10367	1.1495e-05	ENSMUSG00000004366, ENSMUSG00000051980, ENSMUSG00000016349, ENSMUSG00000040867, ENSMUSG00000024261, ENSMUSG00000039536, ENSMUSG00000004267, ENSMUSG00000020173, ENSMUSG00000027457, ENSMUSG00000005716, ENSMUSG00000023064, ENSMUSG00000034675, ENSMUSG00000032340, ENSMUSG00000025920, ENSMUSG00000029088, ENSMUSG00000002496, ENSMUSG00000039137, ENSMUSG00000032589, ENSMUSG00000037624, ENSMUSG00000028945,…	1677	534	19662	1.66866	0.00907417	0.000364557	0.017623
GOTERM_CC_DIRECT	GO:0098793~presynapse	18	0.971922	1.39244e-05	ENSMUSG00000030806, ENSMUSG00000039714, ENSMUSG00000054423, ENSMUSG00000034799, ENSMUSG00000028964, ENSMUSG00000017978, ENSMUSG00000003872, ENSMUSG00000020848, ENSMUSG00000024261, ENSMUSG00000062151, ENSMUSG00000058420, ENSMUSG00000030093, ENSMUSG00000033419, ENSMUSG00000029608, ENSMUSG00000041488, ENSMUSG00000032589, ENSMUSG00000009894, ENSMUSG00000068923	1677	63	19662	3.34986	0.0109814	0.000424606	0.0213471
GOTERM_BP_DIRECT	GO:0006811~ion transport	81	4.37365	1.55239e-05	ENSMUSG00000002105, ENSMUSG00000016346, ENSMUSG00000004319, ENSMUSG00000019210, ENSMUSG00000050856, ENSMUSG00000038690, ENSMUSG00000038717, ENSMUSG00000023169, ENSMUSG00000024327, ENSMUSG00000022843, ENSMUSG00000018770, ENSMUSG00000028096, ENSMUSG00000020432, ENSMUSG00000006057, ENSMUSG00000062683, ENSMUSG00000026576, ENSMUSG00000020436, ENSMUSG00000017412, ENSMUSG00000022956, ENSMUSG00000036570,…	1545	584	18082	1.62327	0.0628006	0.0128881	0.0289802
UP_KEYWORDS	Sterol metabolism	17	0.917927	1.87564e-05	ENSMUSG00000024413, ENSMUSG00000032018, ENSMUSG00000059743, ENSMUSG00000003721, ENSMUSG00000001467, ENSMUSG00000021670, ENSMUSG00000006517, ENSMUSG00000020538, ENSMUSG00000031835, ENSMUSG00000021252, ENSMUSG00000026600, ENSMUSG00000024799, ENSMUSG00000021273, ENSMUSG00000032051, ENSMUSG00000035237, ENSMUSG00000031604, ENSMUSG00000034088	1800	62	22680	3.45484	0.00786542	0.000315811	0.0263531
GOTERM_CC_DIRECT	GO:0005789~endoplasmic reticulum membrane	94	5.07559	1.91694e-05	ENSMUSG00000019873, ENSMUSG00000036078, ENSMUSG00000027347, ENSMUSG00000061666, ENSMUSG00000078974, ENSMUSG00000024873, ENSMUSG00000066441, ENSMUSG00000048486, ENSMUSG00000027195, ENSMUSG00000024327, ENSMUSG00000001467, ENSMUSG00000056629, ENSMUSG00000027489, ENSMUSG00000016194, ENSMUSG00000027198, ENSMUSG00000013858, ENSMUSG00000019295, ENSMUSG00000047719, ENSMUSG00000032180, ENSMUSG00000020538,…	1677	710	19662	1.55226	0.0150865	0.00056286	0.0293871
GOTERM_BP_DIRECT	GO:0008202~steroid metabolic process	21	1.13391	1.97366e-05	ENSMUSG00000024413, ENSMUSG00000018865, ENSMUSG00000032018, ENSMUSG00000059743, ENSMUSG00000003721, ENSMUSG00000001467, ENSMUSG00000021670, ENSMUSG00000016194, ENSMUSG00000030711, ENSMUSG00000006517, ENSMUSG00000020538, ENSMUSG00000031835, ENSMUSG00000021252, ENSMUSG00000003271, ENSMUSG00000026600, ENSMUSG00000024799, ENSMUSG00000021273, ENSMUSG00000032051, ENSMUSG00000035237, ENSMUSG00000031604,…	1545	84	18082	2.92589	0.0791522	0.0136494	0.0368433
UP_KEYWORDS	Ribonucleoprotein	47	2.5378	2.40263e-05	ENSMUSG00000022706, ENSMUSG00000049960, ENSMUSG00000047215, ENSMUSG00000019235, ENSMUSG00000060036, ENSMUSG00000030521, ENSMUSG00000015672, ENSMUSG00000054312, ENSMUSG00000001120, ENSMUSG00000061787, ENSMUSG00000028842, ENSMUSG00000052962, ENSMUSG00000009549, ENSMUSG00000063480, ENSMUSG00000030612, ENSMUSG00000034932, ENSMUSG00000059208, ENSMUSG00000049751, ENSMUSG00000102252, ENSMUSG00000020477,…	1800	308	22680	1.92273	0.0100642	0.000388969	0.0337561
UP_KEYWORDS	Lipoprotein	95	5.12959	2.92755e-05	ENSMUSG00000020841, ENSMUSG00000029510, ENSMUSG00000032507, ENSMUSG00000095845, ENSMUSG00000047842, ENSMUSG00000002459, ENSMUSG00000001847, ENSMUSG00000017144, ENSMUSG00000019173, ENSMUSG00000022594, ENSMUSG00000001844, ENSMUSG00000029544, ENSMUSG00000020436, ENSMUSG00000025035, ENSMUSG00000002458, ENSMUSG00000030788, ENSMUSG00000036570, ENSMUSG00000021263, ENSMUSG00000027581, ENSMUSG00000030086,…	1800	780	22680	1.53462	0.0122495	0.000456383	0.0411297
GOTERM_BP_DIRECT	GO:0016126~sterol biosynthetic process	11	0.593952	4.35574e-05	ENSMUSG00000004880, ENSMUSG00000021252, ENSMUSG00000024799, ENSMUSG00000032018, ENSMUSG00000059743, ENSMUSG00000021273, ENSMUSG00000003721, ENSMUSG00000031604, ENSMUSG00000001467, ENSMUSG00000021670, ENSMUSG00000006517	1545	27	18082	4.76812	0.166387	0.025663	0.0812934		GO:0005794~Golgi apparatus	0.0132805	6.23455	145
GOTERM_CC_DIRECT	GO:0005758~mitochondrial intermembrane space	19	1.02592	4.43473e-05	ENSMUSG00000025968, ENSMUSG00000024208, ENSMUSG00000016257, ENSMUSG00000031781, ENSMUSG00000028964, ENSMUSG00000029433, ENSMUSG00000027187, ENSMUSG00000063694, ENSMUSG00000005981, ENSMUSG00000027199, ENSMUSG00000026895, ENSMUSG00000028648, ENSMUSG00000013701, ENSMUSG00000027944, ENSMUSG00000045438, ENSMUSG00000034203, ENSMUSG00000028756, ENSMUSG00000090247, ENSMUSG00000036751	1677	75	19662	2.97021	0.034557	0.00125522	0.0679731		GO:0030672~synaptic vesicle membrane	0.0133309	6.22908	18
GOTERM_CC_DIRECT	GO:0043005~neuron projection	61	3.29374	5.12186e-05	ENSMUSG00000051980, ENSMUSG00000019775, ENSMUSG00000026986, ENSMUSG00000024862, ENSMUSG00000024261, ENSMUSG00000039536, ENSMUSG00000004267, ENSMUSG00000057455, ENSMUSG00000019370, ENSMUSG00000002413, ENSMUSG00000027457, ENSMUSG00000026360, ENSMUSG00000036438, ENSMUSG00000039809, ENSMUSG00000027581, ENSMUSG00000002496, ENSMUSG00000032589, ENSMUSG00000066551, ENSMUSG00000037624, ENSMUSG00000004961,…	1677	420	19662	1.70285	0.0398036	0.00139962	0.0785012		Ribosomal protein	0.014582	6.09967	36
GOTERM_BP_DIRECT	GO:0034599~cellular response to oxidative stress	17	0.917927	5.67685e-05	ENSMUSG00000029167, ENSMUSG00000045573, ENSMUSG00000028964, ENSMUSG00000024583, ENSMUSG00000028367, ENSMUSG00000039536, ENSMUSG00000005354, ENSMUSG00000013089, ENSMUSG00000030652, ENSMUSG00000025140, ENSMUSG00000024997, ENSMUSG00000025889, ENSMUSG00000034203, ENSMUSG00000021948, ENSMUSG00000026826, ENSMUSG00000028756, ENSMUSG00000050989	1545	63	18082	3.1581	0.211155	0.029213	0.105938		GO:0030426~growth cone	0.0160587	5.9605	32
UP_KEYWORDS	Lipid biosynthesis	29	1.56587	5.82514e-05	ENSMUSG00000038633, ENSMUSG00000059743, ENSMUSG00000023452, ENSMUSG00000026675, ENSMUSG00000027195, ENSMUSG00000031545, ENSMUSG00000001467, ENSMUSG00000020917, ENSMUSG00000006517, ENSMUSG00000023021, ENSMUSG00000024799, ENSMUSG00000021263, ENSMUSG00000030316, ENSMUSG00000031604, ENSMUSG00000028944, ENSMUSG00000024978, ENSMUSG00000032018, ENSMUSG00000063275, ENSMUSG00000025137, ENSMUSG00000025153,…	1800	160	22680	2.28375	0.0242263	0.000875493	0.0818231		GO:0043025~neuronal cell body	0.017623	5.82639	76
GOTERM_BP_DIRECT	GO:0030100~regulation of endocytosis	11	0.593952	6.25911e-05	ENSMUSG00000050732, ENSMUSG00000024261, ENSMUSG00000020375, ENSMUSG00000033419, ENSMUSG00000002496, ENSMUSG00000019173, ENSMUSG00000000711, ENSMUSG00000057455, ENSMUSG00000090935, ENSMUSG00000020132, ENSMUSG00000001036	1545	28	18082	4.59783	0.230115	0.028639	0.116797		GO:0000149~SNARE binding	0.0215994	5.53286	18
GOTERM_BP_DIRECT	GO:0006629~lipid metabolic process	65	3.50972	6.37336e-05	ENSMUSG00000021036, ENSMUSG00000061666, ENSMUSG00000023452, ENSMUSG00000026675, ENSMUSG00000027195, ENSMUSG00000031545, ENSMUSG00000001467, ENSMUSG00000016194, ENSMUSG00000006517, ENSMUSG00000020538, ENSMUSG00000023021, ENSMUSG00000029545, ENSMUSG00000003271, ENSMUSG00000018574, ENSMUSG00000021263, ENSMUSG00000030316, ENSMUSG00000034088, ENSMUSG00000031604, ENSMUSG00000028944, ENSMUSG00000026925,…	1545	459	18082	1.65737	0.233781	0.0262773	0.118928		GO:0098793~presynapse	0.0213471	5.54981	18
GOTERM_BP_DIRECT	GO:0046034~ATP metabolic process	13	0.701944	8.37575e-05	ENSMUSG00000026576, ENSMUSG00000025968, ENSMUSG00000022956, ENSMUSG00000027108, ENSMUSG00000038690, ENSMUSG00000050856, ENSMUSG00000022890, ENSMUSG00000039058, ENSMUSG00000021236, ENSMUSG00000038717, ENSMUSG00000025781, ENSMUSG00000034566, ENSMUSG00000006057	1545	40	18082	3.80366	0.295279	0.0313132	0.156265		GO:0006811~ion transport	0.0289794	5.10883	81
UP_KEYWORDS	Membrane	765	41.3067	8.55491e-05	ENSMUSG00000037916, ENSMUSG00000066057, ENSMUSG00000051980, ENSMUSG00000032777, ENSMUSG00000019775, ENSMUSG00000035189, ENSMUSG00000038690, ENSMUSG00000025204, ENSMUSG00000024261, ENSMUSG00000032507, ENSMUSG00000029782, ENSMUSG00000016194, ENSMUSG00000028909, ENSMUSG00000026259, ENSMUSG00000006057, ENSMUSG00000027457, ENSMUSG00000020262, ENSMUSG00000022956, ENSMUSG00000046378, ENSMUSG00000010086,…	1800	8683	22680	1.1101	0.0353768	0.00124122	0.120146		Sterol metabolism	0.0263621	5.24539	17
GOTERM_BP_DIRECT	GO:0016079~synaptic vesicle exocytosis	9	0.485961	8.89507e-05	ENSMUSG00000039714, ENSMUSG00000021071, ENSMUSG00000054423, ENSMUSG00000033615, ENSMUSG00000035864, ENSMUSG00000017978, ENSMUSG00000062151, ENSMUSG00000029608, ENSMUSG00000053025	1545	19	18082	5.54379	0.310406	0.0304964	0.165947		GO:0005789~endoplasmic reticulum membrane	0.0293871	5.08867	94
UP_KEYWORDS	Steroid biosynthesis	12	0.647948	0.000122455	ENSMUSG00000021252, ENSMUSG00000024799, ENSMUSG00000032018, ENSMUSG00000059743, ENSMUSG00000026675, ENSMUSG00000021273, ENSMUSG00000027195, ENSMUSG00000028470, ENSMUSG00000031604, ENSMUSG00000001467, ENSMUSG00000021670, ENSMUSG00000006517	1800	38	22680	3.97895	0.0502503	0.00171708	0.171935		GO:0008202~steroid metabolic process	0.0368423	4.76249	21
GOTERM_CC_DIRECT	GO:0005802~trans-Golgi network	30	1.61987	0.000126526	ENSMUSG00000020841, ENSMUSG00000037685, ENSMUSG00000002459, ENSMUSG00000063801, ENSMUSG00000047547, ENSMUSG00000001847, ENSMUSG00000012296, ENSMUSG00000056429, ENSMUSG00000016664, ENSMUSG00000024797, ENSMUSG00000025512, ENSMUSG00000032589, ENSMUSG00000028789, ENSMUSG00000056515, ENSMUSG00000019785, ENSMUSG00000032570, ENSMUSG00000033124, ENSMUSG00000027546, ENSMUSG00000030824, ENSMUSG00000030720,…	1677	164	19662	2.14473	0.0954713	0.00333912	0.193817		Ribonucleoprotein	0.0337677	4.88821	47
GOTERM_CC_DIRECT	GO:0030529~intracellular ribonucleoprotein complex	48	2.59179	0.000166502	ENSMUSG00000022706, ENSMUSG00000049960, ENSMUSG00000037958, ENSMUSG00000019235, ENSMUSG00000047215, ENSMUSG00000032777, ENSMUSG00000060036, ENSMUSG00000030521, ENSMUSG00000015672, ENSMUSG00000039536, ENSMUSG00000054312, ENSMUSG00000001120, ENSMUSG00000061787, ENSMUSG00000028842, ENSMUSG00000027968, ENSMUSG00000052962, ENSMUSG00000009549, ENSMUSG00000030612, ENSMUSG00000034932, ENSMUSG00000059208,…	1677	320	19662	1.75868	0.1237	0.00425052	0.254982		GO:0019899~enzyme binding	0.0456969	4.45176	57
UP_KEYWORDS	Signal transduction inhibitor	12	0.647948	0.000202979	ENSMUSG00000026360, ENSMUSG00000020599, ENSMUSG00000038530, ENSMUSG00000019775, ENSMUSG00000002458, ENSMUSG00000030844, ENSMUSG00000021719, ENSMUSG00000020027, ENSMUSG00000056153, ENSMUSG00000002459, ENSMUSG00000053113, ENSMUSG00000026527	1800	40	22680	3.78	0.0819129	0.00275307	0.284847		Lipoprotein	0.0411438	4.60318	95
GOTERM_BP_DIRECT	GO:0007264~small GTPase mediated signal transduction	38	2.05184	0.000223687	ENSMUSG00000027347, ENSMUSG00000029333, ENSMUSG00000022722, ENSMUSG00000021708, ENSMUSG00000047842, ENSMUSG00000001847, ENSMUSG00000019173, ENSMUSG00000017144, ENSMUSG00000057455, ENSMUSG00000021700, ENSMUSG00000049892, ENSMUSG00000034789, ENSMUSG00000025035, ENSMUSG00000025170, ENSMUSG00000028945, ENSMUSG00000056515, ENSMUSG00000038608, ENSMUSG00000021062, ENSMUSG00000029449, ENSMUSG00000022159,…	1545	236	18082	1.88447	0.607284	0.0693738	0.416815
GOTERM_BP_DIRECT	GO:0051932~synaptic transmission, GABAergic	7	0.37797	0.000225798	ENSMUSG00000020436, ENSMUSG00000017412, ENSMUSG00000004319, ENSMUSG00000010803, ENSMUSG00000020428, ENSMUSG00000026825, ENSMUSG00000001847	1545	12	18082	6.82708	0.610733	0.0651714	0.42074
UP_KEYWORDS	ATP synthesis	7	0.37797	0.000260098	ENSMUSG00000022956, ENSMUSG00000071654, ENSMUSG00000038690, ENSMUSG00000050856, ENSMUSG00000038717, ENSMUSG00000025781, ENSMUSG00000016252	1800	13	22680	6.78462	0.103732	0.00341651	0.364867
GOTERM_CC_DIRECT	GO:0045211~postsynaptic membrane	36	1.94384	0.000285484	ENSMUSG00000036078, ENSMUSG00000022568, ENSMUSG00000026121, ENSMUSG00000024873, ENSMUSG00000018166, ENSMUSG00000010803, ENSMUSG00000017978, ENSMUSG00000000560, ENSMUSG00000096054, ENSMUSG00000035109, ENSMUSG00000027488, ENSMUSG00000037703, ENSMUSG00000020436, ENSMUSG00000041263, ENSMUSG00000039809, ENSMUSG00000044216, ENSMUSG00000034675, ENSMUSG00000029211, ENSMUSG00000040797, ENSMUSG00000051790,…	1677	222	19662	1.90127	0.202618	0.00705069	0.436819
GOTERM_BP_DIRECT	GO:0015992~proton transport	15	0.809935	0.00029023	ENSMUSG00000019210, ENSMUSG00000022890, ENSMUSG00000050856, ENSMUSG00000038690, ENSMUSG00000038717, ENSMUSG00000025781, ENSMUSG00000016252, ENSMUSG00000018770, ENSMUSG00000034566, ENSMUSG00000000563, ENSMUSG00000006057, ENSMUSG00000062683, ENSMUSG00000022956, ENSMUSG00000023030, ENSMUSG00000021114	1545	58	18082	3.02678	0.702624	0.0776684	0.540492
UP_KEYWORDS	Cholesterol metabolism	14	0.75594	0.000290328	ENSMUSG00000024413, ENSMUSG00000059743, ENSMUSG00000003721, ENSMUSG00000001467, ENSMUSG00000021670, ENSMUSG00000006517, ENSMUSG00000020538, ENSMUSG00000031835, ENSMUSG00000026600, ENSMUSG00000024799, ENSMUSG00000021273, ENSMUSG00000032051, ENSMUSG00000035237, ENSMUSG00000034088	1800	55	22680	3.20727	0.115069	0.00369757	0.407194
GOTERM_BP_DIRECT	GO:0006886~intracellular protein transport	37	1.99784	0.000330891	ENSMUSG00000052302, ENSMUSG00000074513, ENSMUSG00000041670, ENSMUSG00000000538, ENSMUSG00000001440, ENSMUSG00000021248, ENSMUSG00000063801, ENSMUSG00000047547, ENSMUSG00000070939, ENSMUSG00000055371, ENSMUSG00000027438, ENSMUSG00000021824, ENSMUSG00000029560, ENSMUSG00000042249, ENSMUSG00000021576, ENSMUSG00000041488, ENSMUSG00000034187, ENSMUSG00000021124, ENSMUSG00000021038, ENSMUSG00000032733,…	1545	232	18082	1.86652	0.749098	0.0827895	0.615995
UP_KEYWORDS	Proteasome	14	0.75594	0.000350966	ENSMUSG00000024583, ENSMUSG00000047879, ENSMUSG00000031897, ENSMUSG00000014769, ENSMUSG00000027566, ENSMUSG00000005625, ENSMUSG00000019303, ENSMUSG00000042541, ENSMUSG00000022193, ENSMUSG00000026750, ENSMUSG00000030603, ENSMUSG00000030751, ENSMUSG00000005312, ENSMUSG00000005779	1800	56	22680	3.15	0.137381	0.00433711	0.492045
GOTERM_CC_DIRECT	GO:0005763~mitochondrial small ribosomal subunit	10	0.539957	0.000360169	ENSMUSG00000049960, ENSMUSG00000040269, ENSMUSG00000032459, ENSMUSG00000020477, ENSMUSG00000062981, ENSMUSG00000054312, ENSMUSG00000014551, ENSMUSG00000045948, ENSMUSG00000068921, ENSMUSG00000061474	1677	28	19662	4.18732	0.248486	0.00861918	0.5508
GOTERM_CC_DIRECT	GO:0005622~intracellular	175	9.44924	0.000382359	ENSMUSG00000021071, ENSMUSG00000022451, ENSMUSG00000004319, ENSMUSG00000078974, ENSMUSG00000059142, ENSMUSG00000035189, ENSMUSG00000041670, ENSMUSG00000029433, ENSMUSG00000066441, ENSMUSG00000053137, ENSMUSG00000045251, ENSMUSG00000047842, ENSMUSG00000001847, ENSMUSG00000035109, ENSMUSG00000021824, ENSMUSG00000041261, ENSMUSG00000040631, ENSMUSG00000026430, ENSMUSG00000002844, ENSMUSG00000053693,…	1677	1599	19662	1.28317	0.2616	0.00888002	0.584642
GOTERM_CC_DIRECT	GO:0031902~late endosome membrane	19	1.02592	0.000386999	ENSMUSG00000027291, ENSMUSG00000027534, ENSMUSG00000024413, ENSMUSG00000050732, ENSMUSG00000004319, ENSMUSG00000020946, ENSMUSG00000033124, ENSMUSG00000029434, ENSMUSG00000029151, ENSMUSG00000014402, ENSMUSG00000033916, ENSMUSG00000020100, ENSMUSG00000038740, ENSMUSG00000025492, ENSMUSG00000059323, ENSMUSG00000028559, ENSMUSG00000026088, ENSMUSG00000023030, ENSMUSG00000021124	1677	88	19662	2.53143	0.264312	0.00873164	0.591716
UP_KEYWORDS	Oxidoreductase	76	4.10367	0.000401709	ENSMUSG00000058240, ENSMUSG00000037916, ENSMUSG00000025968, ENSMUSG00000026675, ENSMUSG00000030905, ENSMUSG00000066441, ENSMUSG00000027195, ENSMUSG00000025140, ENSMUSG00000001467, ENSMUSG00000028207, ENSMUSG00000029475, ENSMUSG00000016194, ENSMUSG00000029545, ENSMUSG00000018574, ENSMUSG00000046378, ENSMUSG00000060376, ENSMUSG00000022223, ENSMUSG00000034203, ENSMUSG00000021263, ENSMUSG00000037373,…	1800	639	22680	1.49859	0.155621	0.00482129	0.562999
GOTERM_BP_DIRECT	GO:0006754~ATP biosynthetic process	9	0.485961	0.000423277	ENSMUSG00000015790, ENSMUSG00000022956, ENSMUSG00000071654, ENSMUSG00000038690, ENSMUSG00000050856, ENSMUSG00000038717, ENSMUSG00000025781, ENSMUSG00000016252, ENSMUSG00000030695	1545	23	18082	4.57965	0.829467	0.0988184	0.787339
UP_KEYWORDS	Nucleus	416	22.4622	0.000434947	ENSMUSG00000002658, ENSMUSG00000024268, ENSMUSG00000037958, ENSMUSG00000019775, ENSMUSG00000032777, ENSMUSG00000054237, ENSMUSG00000025104, ENSMUSG00000042826, ENSMUSG00000020262, ENSMUSG00000060639, ENSMUSG00000010086, ENSMUSG00000052981, ENSMUSG00000040430, ENSMUSG00000030533, ENSMUSG00000048967, ENSMUSG00000072872, ENSMUSG00000032637, ENSMUSG00000013089, ENSMUSG00000039166, ENSMUSG00000025889,…	1800	4534	22680	1.15607	0.167359	0.00507465	0.609451
UP_KEYWORDS	Chaperone	30	1.61987	0.000542509	ENSMUSG00000049792, ENSMUSG00000039703, ENSMUSG00000027679, ENSMUSG00000024309, ENSMUSG00000028416, ENSMUSG00000041548, ENSMUSG00000028964, ENSMUSG00000021079, ENSMUSG00000003814, ENSMUSG00000005981, ENSMUSG00000043510, ENSMUSG00000091971, ENSMUSG00000030614, ENSMUSG00000024346, ENSMUSG00000023973, ENSMUSG00000026154, ENSMUSG00000024963, ENSMUSG00000027274, ENSMUSG00000068184, ENSMUSG00000037316,…	1800	191	22680	1.97906	0.204241	0.00615553	0.759635
UP_KEYWORDS	Prenylation	26	1.40389	0.000625975	ENSMUSG00000016179, ENSMUSG00000032507, ENSMUSG00000047842, ENSMUSG00000001847, ENSMUSG00000019173, ENSMUSG00000017144, ENSMUSG00000043004, ENSMUSG00000021700, ENSMUSG00000049892, ENSMUSG00000034789, ENSMUSG00000025170, ENSMUSG00000071658, ENSMUSG00000028945, ENSMUSG00000056515, ENSMUSG00000039714, ENSMUSG00000021062, ENSMUSG00000029449, ENSMUSG00000026925, ENSMUSG00000022159, ENSMUSG00000054855,…	1800	157	22680	2.08662	0.231733	0.00691331	0.876029
GOTERM_CC_DIRECT	GO:0031045~dense core granule	7	0.37797	0.000626235	ENSMUSG00000021680, ENSMUSG00000054423, ENSMUSG00000037852, ENSMUSG00000050711, ENSMUSG00000035864, ENSMUSG00000024261, ENSMUSG00000004961	1677	14	19662	5.86225	0.391501	0.0137041	0.955866
GOTERM_BP_DIRECT	GO:1902600~hydrogen ion transmembrane transport	8	0.431965	0.000655752	ENSMUSG00000062683, ENSMUSG00000021520, ENSMUSG00000049387, ENSMUSG00000035885, ENSMUSG00000025488, ENSMUSG00000059534, ENSMUSG00000018770, ENSMUSG00000006057	1545	19	18082	4.92781	0.93547	0.141233	1.21727
UP_KEYWORDS	Sterol biosynthesis	9	0.485961	0.000658177	ENSMUSG00000021252, ENSMUSG00000024799, ENSMUSG00000032018, ENSMUSG00000059743, ENSMUSG00000021273, ENSMUSG00000031604, ENSMUSG00000001467, ENSMUSG00000021670, ENSMUSG00000006517	1800	26	22680	4.36154	0.242085	0.00708208	0.920901
GOTERM_CC_DIRECT	GO:0031201~SNARE complex	13	0.701944	0.000663969	ENSMUSG00000030806, ENSMUSG00000028955, ENSMUSG00000050732, ENSMUSG00000020946, ENSMUSG00000033615, ENSMUSG00000035864, ENSMUSG00000040722, ENSMUSG00000020848, ENSMUSG00000010392, ENSMUSG00000041488, ENSMUSG00000009894, ENSMUSG00000029428, ENSMUSG00000021124	1677	49	19662	3.11058	0.409451	0.0141344	1.01319
UP_KEYWORDS	Postsynaptic cell membrane	28	1.51188	0.000704131	ENSMUSG00000036078, ENSMUSG00000026121, ENSMUSG00000024873, ENSMUSG00000010803, ENSMUSG00000000560, ENSMUSG00000035109, ENSMUSG00000037703, ENSMUSG00000020436, ENSMUSG00000041263, ENSMUSG00000039809, ENSMUSG00000044216, ENSMUSG00000029211, ENSMUSG00000051790, ENSMUSG00000055078, ENSMUSG00000078484, ENSMUSG00000003872, ENSMUSG00000020428, ENSMUSG00000036306, ENSMUSG00000022656, ENSMUSG00000027950,…	1800	176	22680	2.00455	0.256617	0.00738617	0.984903
UP_KEYWORDS	Ubl conjugation	154	8.31533	0.000766108	ENSMUSG00000029610, ENSMUSG00000021071, ENSMUSG00000051980, ENSMUSG00000037958, ENSMUSG00000019775, ENSMUSG00000032777, ENSMUSG00000057156, ENSMUSG00000006906, ENSMUSG00000029433, ENSMUSG00000024966, ENSMUSG00000045896, ENSMUSG00000002459, ENSMUSG00000022508, ENSMUSG00000001847, ENSMUSG00000025402, ENSMUSG00000031878, ENSMUSG00000019370, ENSMUSG00000024054, ENSMUSG00000041263, ENSMUSG00000060639,…	1800	1505	22680	1.2893	0.275776	0.00783875	1.07116
GOTERM_CC_DIRECT	GO:0005750~mitochondrial respiratory chain complex III	6	0.323974	0.000782402	ENSMUSG00000021520, ENSMUSG00000063882, ENSMUSG00000038462, ENSMUSG00000044894, ENSMUSG00000071654, ENSMUSG00000059534	1677	10	19662	7.0347	0.462425	0.0162012	1.1929
GOTERM_BP_DIRECT	GO:0045806~negative regulation of endocytosis	6	0.323974	0.00078841	ENSMUSG00000027457, ENSMUSG00000026792, ENSMUSG00000016664, ENSMUSG00000040722, ENSMUSG00000035629, ENSMUSG00000032733	1545	10	18082	7.02214	0.962942	0.159229	1.46181
GOTERM_BP_DIRECT	GO:0007214~gamma-aminobutyric acid signaling pathway	9	0.485961	0.000800137	ENSMUSG00000020436, ENSMUSG00000017412, ENSMUSG00000055078, ENSMUSG00000039809, ENSMUSG00000010803, ENSMUSG00000029211, ENSMUSG00000020428, ENSMUSG00000000560, ENSMUSG00000032562	1545	25	18082	4.21328	0.964715	0.153983	1.4834
GOTERM_CC_DIRECT	GO:0043204~perikaryon	26	1.40389	0.000885687	ENSMUSG00000021680, ENSMUSG00000030854, ENSMUSG00000033061, ENSMUSG00000019795, ENSMUSG00000025576, ENSMUSG00000022843, ENSMUSG00000004267, ENSMUSG00000021477, ENSMUSG00000028785, ENSMUSG00000028789, ENSMUSG00000057897, ENSMUSG00000045573, ENSMUSG00000047976, ENSMUSG00000024397, ENSMUSG00000037852, ENSMUSG00000028373, ENSMUSG00000027712, ENSMUSG00000024008, ENSMUSG00000032532, ENSMUSG00000004936,…	1677	150	19662	2.03225	0.504734	0.0178556	1.34938
GOTERM_CC_DIRECT	GO:0005634~nucleus	571	30.8315	0.000989529	ENSMUSG00000002658, ENSMUSG00000024268, ENSMUSG00000051980, ENSMUSG00000037958, ENSMUSG00000032777, ENSMUSG00000019775, ENSMUSG00000038690, ENSMUSG00000054237, ENSMUSG00000025104, ENSMUSG00000042826, ENSMUSG00000019370, ENSMUSG00000091971, ENSMUSG00000020262, ENSMUSG00000022956, ENSMUSG00000060639, ENSMUSG00000010086, ENSMUSG00000038412, ENSMUSG00000019979, ENSMUSG00000042032, ENSMUSG00000025512,…	1677	6019	19662	1.11226	0.543919	0.0194358	1.50647
GOTERM_CC_DIRECT	GO:0000139~Golgi membrane	54	2.91577	0.00102201	ENSMUSG00000074513, ENSMUSG00000002105, ENSMUSG00000027347, ENSMUSG00000040722, ENSMUSG00000001847, ENSMUSG00000017144, ENSMUSG00000039533, ENSMUSG00000062995, ENSMUSG00000027198, ENSMUSG00000020538, ENSMUSG00000029544, ENSMUSG00000025035, ENSMUSG00000043388, ENSMUSG00000054008, ENSMUSG00000022789, ENSMUSG00000047712, ENSMUSG00000034620, ENSMUSG00000028945, ENSMUSG00000026923, ENSMUSG00000026925,…	1677	403	19662	1.57103	0.555527	0.0195829	1.55555
UP_KEYWORDS	Ubl conjugation pathway	73	3.94168	0.00113862	ENSMUSG00000005371, ENSMUSG00000021071, ENSMUSG00000038965, ENSMUSG00000006906, ENSMUSG00000047879, ENSMUSG00000032507, ENSMUSG00000047013, ENSMUSG00000031878, ENSMUSG00000045210, ENSMUSG00000029475, ENSMUSG00000051234, ENSMUSG00000075486, ENSMUSG00000019295, ENSMUSG00000041528, ENSMUSG00000070923, ENSMUSG00000024325, ENSMUSG00000020883, ENSMUSG00000020027, ENSMUSG00000037622, ENSMUSG00000052981,…	1800	631	22680	1.45769	0.38099	0.0113549	1.58815
UP_KEYWORDS	Threonine protease	8	0.431965	0.00114846	ENSMUSG00000022193, ENSMUSG00000026750, ENSMUSG00000030751, ENSMUSG00000031897, ENSMUSG00000014769, ENSMUSG00000039033, ENSMUSG00000005779, ENSMUSG00000027566	1800	22	22680	4.58182	0.383552	0.0111877	1.60177
UP_KEYWORDS	Cell projection	77	4.15767	0.00138049	ENSMUSG00000046985, ENSMUSG00000036078, ENSMUSG00000075273, ENSMUSG00000021071, ENSMUSG00000024873, ENSMUSG00000059436, ENSMUSG00000029471, ENSMUSG00000004558, ENSMUSG00000020173, ENSMUSG00000022594, ENSMUSG00000026259, ENSMUSG00000066151, ENSMUSG00000022994, ENSMUSG00000025035, ENSMUSG00000034675, ENSMUSG00000039781, ENSMUSG00000000416, ENSMUSG00000027581, ENSMUSG00000031971, ENSMUSG00000039137,…	1800	678	22680	1.43097	0.440991	0.013131	1.92247
GOTERM_BP_DIRECT	GO:0009968~negative regulation of signal transduction	13	0.701944	0.00141582	ENSMUSG00000026360, ENSMUSG00000020599, ENSMUSG00000038530, ENSMUSG00000019775, ENSMUSG00000002458, ENSMUSG00000030844, ENSMUSG00000021719, ENSMUSG00000018166, ENSMUSG00000020027, ENSMUSG00000056153, ENSMUSG00000002459, ENSMUSG00000053113, ENSMUSG00000026527	1545	53	18082	2.87068	0.997313	0.245637	2.61064
GOTERM_CC_DIRECT	GO:0033268~node of Ranvier	7	0.37797	0.00143882	ENSMUSG00000016346, ENSMUSG00000011751, ENSMUSG00000026442, ENSMUSG00000039952, ENSMUSG00000056222, ENSMUSG00000019194, ENSMUSG00000064329	1677	16	19662	5.12947	0.680758	0.0268197	2.18344
GOTERM_CC_DIRECT	GO:0042734~presynaptic membrane	16	0.863931	0.00146155	ENSMUSG00000030806, ENSMUSG00000022568, ENSMUSG00000047976, ENSMUSG00000034799, ENSMUSG00000041670, ENSMUSG00000063239, ENSMUSG00000017978, ENSMUSG00000062151, ENSMUSG00000020428, ENSMUSG00000027457, ENSMUSG00000098557, ENSMUSG00000035864, ENSMUSG00000033419, ENSMUSG00000051790, ENSMUSG00000037653, ENSMUSG00000041488	1677	75	19662	2.50123	0.686468	0.0266128	2.21757
GOTERM_BP_DIRECT	GO:0006897~endocytosis	29	1.56587	0.00151133	ENSMUSG00000020375, ENSMUSG00000003200, ENSMUSG00000001847, ENSMUSG00000022999, ENSMUSG00000066151, ENSMUSG00000037601, ENSMUSG00000025468, ENSMUSG00000016664, ENSMUSG00000022789, ENSMUSG00000029560, ENSMUSG00000056185, ENSMUSG00000026825, ENSMUSG00000028923, ENSMUSG00000032737, ENSMUSG00000035629, ENSMUSG00000001036, ENSMUSG00000032733, ENSMUSG00000024413, ENSMUSG00000020876, ENSMUSG00000027546,…	1545	181	18082	1.87516	0.998198	0.249662	2.78439
GOTERM_CC_DIRECT	GO:0005770~late endosome	23	1.2419	0.0015833	ENSMUSG00000027534, ENSMUSG00000056515, ENSMUSG00000029333, ENSMUSG00000004319, ENSMUSG00000028062, ENSMUSG00000028373, ENSMUSG00000033124, ENSMUSG00000005986, ENSMUSG00000020375, ENSMUSG00000027636, ENSMUSG00000029434, ENSMUSG00000004936, ENSMUSG00000030720, ENSMUSG00000029151, ENSMUSG00000014402, ENSMUSG00000038740, ENSMUSG00000025512, ENSMUSG00000022365, ENSMUSG00000035629, ENSMUSG00000018442,…	1677	131	19662	2.0585	0.715367	0.0281541	2.40022
GOTERM_CC_DIRECT	GO:0030425~dendrite	62	3.34773	0.00175596	ENSMUSG00000021071, ENSMUSG00000024873, ENSMUSG00000040867, ENSMUSG00000059436, ENSMUSG00000024261, ENSMUSG00000039536, ENSMUSG00000022843, ENSMUSG00000020173, ENSMUSG00000062995, ENSMUSG00000022594, ENSMUSG00000029088, ENSMUSG00000025920, ENSMUSG00000071658, ENSMUSG00000002496, ENSMUSG00000039137, ENSMUSG00000032589, ENSMUSG00000028945, ENSMUSG00000028789, ENSMUSG00000057897, ENSMUSG00000022462,…	1677	490	19662	1.48351	0.751845	0.0304964	2.65868
GOTERM_BP_DIRECT	GO:0098779~mitophagy in response to mitochondrial depolarization	23	1.2419	0.00178341	ENSMUSG00000053841, ENSMUSG00000030792, ENSMUSG00000038780, ENSMUSG00000020321, ENSMUSG00000055078, ENSMUSG00000057337, ENSMUSG00000054428, ENSMUSG00000027712, ENSMUSG00000035885, ENSMUSG00000037259, ENSMUSG00000004936, ENSMUSG00000028998, ENSMUSG00000018659, ENSMUSG00000078784, ENSMUSG00000026576, ENSMUSG00000022054, ENSMUSG00000023923, ENSMUSG00000021196, ENSMUSG00000028756, ENSMUSG00000023050,…	1545	132	18082	2.03926	0.999423	0.27693	3.2778
GOTERM_BP_DIRECT	GO:0048791~calcium ion-regulated exocytosis of neurotransmitter	9	0.485961	0.00182542	ENSMUSG00000030806, ENSMUSG00000041670, ENSMUSG00000024261, ENSMUSG00000020848, ENSMUSG00000058420, ENSMUSG00000035226, ENSMUSG00000029608, ENSMUSG00000004961, ENSMUSG00000068923	1545	28	18082	3.76186	0.999516	0.272445	3.35378
GOTERM_BP_DIRECT	GO:2000463~positive regulation of excitatory postsynaptic potential	9	0.485961	0.00182542	ENSMUSG00000042453, ENSMUSG00000030806, ENSMUSG00000030093, ENSMUSG00000042589, ENSMUSG00000041670, ENSMUSG00000026959, ENSMUSG00000034675, ENSMUSG00000051790, ENSMUSG00000059456	1545	28	18082	3.76186	0.999516	0.272445	3.35378
GOTERM_CC_DIRECT	GO:0048471~perinuclear region of cytoplasm	82	4.42765	0.00212067	ENSMUSG00000002105, ENSMUSG00000020841, ENSMUSG00000022451, ENSMUSG00000025147, ENSMUSG00000024261, ENSMUSG00000029434, ENSMUSG00000004558, ENSMUSG00000039533, ENSMUSG00000020173, ENSMUSG00000062995, ENSMUSG00000091971, ENSMUSG00000028441, ENSMUSG00000022789, ENSMUSG00000023064, ENSMUSG00000034675, ENSMUSG00000027581, ENSMUSG00000042249, ENSMUSG00000002496, ENSMUSG00000021124, ENSMUSG00000028789,…	1677	692	19662	1.38932	0.814274	0.0359358	3.20253
GOTERM_CC_DIRECT	GO:0016023~cytoplasmic, membrane-bounded vesicle	25	1.34989	0.00215486	ENSMUSG00000036078, ENSMUSG00000032281, ENSMUSG00000047976, ENSMUSG00000047879, ENSMUSG00000051355, ENSMUSG00000048978, ENSMUSG00000017978, ENSMUSG00000027636, ENSMUSG00000030849, ENSMUSG00000002459, ENSMUSG00000001847, ENSMUSG00000075284, ENSMUSG00000059361, ENSMUSG00000002458, ENSMUSG00000041263, ENSMUSG00000025492, ENSMUSG00000052752, ENSMUSG00000027944, ENSMUSG00000022099, ENSMUSG00000057672,…	1677	151	19662	1.94114	0.819252	0.0357424	3.25337
GOTERM_CC_DIRECT	GO:0043679~axon terminus	17	0.917927	0.00227687	ENSMUSG00000034891, ENSMUSG00000021680, ENSMUSG00000045573, ENSMUSG00000047976, ENSMUSG00000051980, ENSMUSG00000038077, ENSMUSG00000004319, ENSMUSG00000030844, ENSMUSG00000027712, ENSMUSG00000019890, ENSMUSG00000025190, ENSMUSG00000025889, ENSMUSG00000027895, ENSMUSG00000023064, ENSMUSG00000028931, ENSMUSG00000022469, ENSMUSG00000037624	1677	86	19662	2.31764	0.835955	0.0369584	3.43458
GOTERM_BP_DIRECT	GO:0008089~anterograde axonal transport	8	0.431965	0.00235545	ENSMUSG00000021824, ENSMUSG00000057531, ENSMUSG00000057506, ENSMUSG00000063801, ENSMUSG00000090247, ENSMUSG00000063077, ENSMUSG00000062444, ENSMUSG00000020132	1545	23	18082	4.0708	0.999947	0.325718	4.30746
GOTERM_BP_DIRECT	GO:0060291~long-term synaptic potentiation	12	0.647948	0.0023759	ENSMUSG00000042453, ENSMUSG00000025889, ENSMUSG00000034799, ENSMUSG00000041670, ENSMUSG00000020932, ENSMUSG00000021708, ENSMUSG00000041488, ENSMUSG00000059456, ENSMUSG00000009894, ENSMUSG00000002413, ENSMUSG00000026385, ENSMUSG00000057897	1545	49	18082	2.86618	0.999952	0.317671	4.34407
UP_KEYWORDS	Lysosome	34	1.83585	0.00252915	ENSMUSG00000027534, ENSMUSG00000050732, ENSMUSG00000007891, ENSMUSG00000029434, ENSMUSG00000002320, ENSMUSG00000057506, ENSMUSG00000029151, ENSMUSG00000022848, ENSMUSG00000020100, ENSMUSG00000025759, ENSMUSG00000025534, ENSMUSG00000021477, ENSMUSG00000025512, ENSMUSG00000022620, ENSMUSG00000090247, ENSMUSG00000035629, ENSMUSG00000021124, ENSMUSG00000027291, ENSMUSG00000024413, ENSMUSG00000028062,…	1800	249	22680	1.72048	0.655659	0.0234132	3.49587
GOTERM_CC_DIRECT	GO:0005759~mitochondrial matrix	29	1.56587	0.00261611	ENSMUSG00000021748, ENSMUSG00000024208, ENSMUSG00000026618, ENSMUSG00000026003, ENSMUSG00000059743, ENSMUSG00000028964, ENSMUSG00000027618, ENSMUSG00000005981, ENSMUSG00000020079, ENSMUSG00000032527, ENSMUSG00000029545, ENSMUSG00000026154, ENSMUSG00000025486, ENSMUSG00000090247, ENSMUSG00000049225, ENSMUSG00000032047, ENSMUSG00000003526, ENSMUSG00000026260, ENSMUSG00000024556, ENSMUSG00000044986,…	1677	188	19662	1.80857	0.874732	0.0415078	3.93678
UP_KEYWORDS	Ubiquinone	8	0.431965	0.00262262	ENSMUSG00000071014, ENSMUSG00000059734, ENSMUSG00000024099, ENSMUSG00000037916, ENSMUSG00000025968, ENSMUSG00000021764, ENSMUSG00000023089, ENSMUSG00000030869	1800	25	22680	4.032	0.668979	0.0237477	3.62287
UP_KEYWORDS	Amino-acid biosynthesis	8	0.431965	0.00262262	ENSMUSG00000024640, ENSMUSG00000029752, ENSMUSG00000053398, ENSMUSG00000030268, ENSMUSG00000028179, ENSMUSG00000025140, ENSMUSG00000024039, ENSMUSG00000025190	1800	25	22680	4.032	0.668979	0.0237477	3.62287
GOTERM_CC_DIRECT	GO:0031390~Ctf18 RFC-like complex	5	0.269978	0.0027824	ENSMUSG00000019214, ENSMUSG00000033970, ENSMUSG00000046691, ENSMUSG00000022881, ENSMUSG00000029363	1677	8	19662	7.32782	0.890246	0.0432282	4.18204
GOTERM_BP_DIRECT	GO:0034551~mitochondrial respiratory chain complex III assembly	5	0.269978	0.00279976	ENSMUSG00000021520, ENSMUSG00000024208, ENSMUSG00000071654, ENSMUSG00000059534, ENSMUSG00000028982	1545	8	18082	7.31472	0.999992	0.351987	5.10002
GOTERM_BP_DIRECT	GO:1900264~positive regulation of DNA-directed DNA polymerase activity	5	0.269978	0.00279976	ENSMUSG00000019214, ENSMUSG00000033970, ENSMUSG00000046691, ENSMUSG00000022881, ENSMUSG00000029363	1545	8	18082	7.31472	0.999992	0.351987	5.10002
GOTERM_CC_DIRECT	GO:0005765~lysosomal membrane	34	1.83585	0.00285783	ENSMUSG00000026791, ENSMUSG00000037936, ENSMUSG00000050732, ENSMUSG00000019210, ENSMUSG00000029434, ENSMUSG00000002320, ENSMUSG00000057506, ENSMUSG00000032560, ENSMUSG00000029151, ENSMUSG00000019173, ENSMUSG00000022848, ENSMUSG00000021824, ENSMUSG00000020100, ENSMUSG00000025759, ENSMUSG00000017765, ENSMUSG00000090247, ENSMUSG00000003458, ENSMUSG00000034187, ENSMUSG00000021124, ENSMUSG00000027291,…	1677	234	19662	1.70356	0.896637	0.0435245	4.29311
GOTERM_CC_DIRECT	GO:1902711~GABA-A receptor complex	7	0.37797	0.00287543	ENSMUSG00000020436, ENSMUSG00000055078, ENSMUSG00000010803, ENSMUSG00000029211, ENSMUSG00000020428, ENSMUSG00000000560, ENSMUSG00000029054	1677	18	19662	4.55953	0.898073	0.0429632	4.31901
GOTERM_BP_DIRECT	GO:0006821~chloride transport	16	0.863931	0.00288842	ENSMUSG00000004319, ENSMUSG00000055078, ENSMUSG00000035189, ENSMUSG00000037949, ENSMUSG00000010803, ENSMUSG00000000560, ENSMUSG00000020428, ENSMUSG00000022843, ENSMUSG00000034863, ENSMUSG00000029998, ENSMUSG00000020436, ENSMUSG00000036570, ENSMUSG00000029211, ENSMUSG00000057092, ENSMUSG00000029054, ENSMUSG00000029016	1545	80	18082	2.34071	0.999994	0.350542	5.25744
UP_KEYWORDS	NADP	26	1.40389	0.00296196	ENSMUSG00000058240, ENSMUSG00000028692, ENSMUSG00000026675, ENSMUSG00000025871, ENSMUSG00000028961, ENSMUSG00000066441, ENSMUSG00000030905, ENSMUSG00000027195, ENSMUSG00000025140, ENSMUSG00000001467, ENSMUSG00000016194, ENSMUSG00000024799, ENSMUSG00000022223, ENSMUSG00000042032, ENSMUSG00000032018, ENSMUSG00000040181, ENSMUSG00000025153, ENSMUSG00000027187, ENSMUSG00000021670, ENSMUSG00000020256,…	1800	175	22680	1.872	0.713162	0.0262211	4.08261
GOTERM_BP_DIRECT	GO:0045454~cell redox homeostasis	14	0.75594	0.00299303	ENSMUSG00000024583, ENSMUSG00000040697, ENSMUSG00000028367, ENSMUSG00000005354, ENSMUSG00000025823, ENSMUSG00000025130, ENSMUSG00000024997, ENSMUSG00000036327, ENSMUSG00000058709, ENSMUSG00000021830, ENSMUSG00000024953, ENSMUSG00000026701, ENSMUSG00000050043, ENSMUSG00000033684	1545	65	18082	2.52077	0.999996	0.350693	5.44285
UP_KEYWORDS	GTP-binding	42	2.26782	0.00316899	ENSMUSG00000022722, ENSMUSG00000033910, ENSMUSG00000016349, ENSMUSG00000047842, ENSMUSG00000001847, ENSMUSG00000019173, ENSMUSG00000032562, ENSMUSG00000017144, ENSMUSG00000057455, ENSMUSG00000021700, ENSMUSG00000049892, ENSMUSG00000015961, ENSMUSG00000025035, ENSMUSG00000034789, ENSMUSG00000058672, ENSMUSG00000022789, ENSMUSG00000020457, ENSMUSG00000025170, ENSMUSG00000026202, ENSMUSG00000026825,…	1800	332	22680	1.59398	0.737174	0.0274549	4.3621
GOTERM_CC_DIRECT	GO:0060076~excitatory synapse	10	0.539957	0.00322456	ENSMUSG00000033295, ENSMUSG00000059974, ENSMUSG00000034799, ENSMUSG00000026959, ENSMUSG00000035864, ENSMUSG00000034675, ENSMUSG00000030849, ENSMUSG00000051790, ENSMUSG00000032589, ENSMUSG00000068923	1677	37	19662	3.16879	0.922789	0.0471757	4.83138
GOTERM_BP_DIRECT	GO:0006122~mitochondrial electron transport, ubiquinol to cytochrome c	6	0.323974	0.00323875	ENSMUSG00000021520, ENSMUSG00000063882, ENSMUSG00000044894, ENSMUSG00000071654, ENSMUSG00000059534, ENSMUSG00000063694	1545	13	18082	5.40164	0.999999	0.363507	5.87701
GOTERM_BP_DIRECT	GO:0009058~biosynthetic process	10	0.539957	0.00325981	ENSMUSG00000021036, ENSMUSG00000050323, ENSMUSG00000025137, ENSMUSG00000033096, ENSMUSG00000020256, ENSMUSG00000021273, ENSMUSG00000021468, ENSMUSG00000025153, ENSMUSG00000031672, ENSMUSG00000025190	1545	37	18082	3.16312	0.999999	0.356	5.91414
UP_KEYWORDS	Redox-active center	11	0.593952	0.00329088	ENSMUSG00000041571, ENSMUSG00000021792, ENSMUSG00000024583, ENSMUSG00000034203, ENSMUSG00000028367, ENSMUSG00000005354, ENSMUSG00000024953, ENSMUSG00000025823, ENSMUSG00000025130, ENSMUSG00000024997, ENSMUSG00000026701	1800	47	22680	2.94894	0.750362	0.027924	4.5263
GOTERM_BP_DIRECT	GO:0008203~cholesterol metabolic process	17	0.917927	0.00331483	ENSMUSG00000031996, ENSMUSG00000024413, ENSMUSG00000059743, ENSMUSG00000040564, ENSMUSG00000003721, ENSMUSG00000001467, ENSMUSG00000027187, ENSMUSG00000021670, ENSMUSG00000006517, ENSMUSG00000020538, ENSMUSG00000031835, ENSMUSG00000026600, ENSMUSG00000024799, ENSMUSG00000021273, ENSMUSG00000032051, ENSMUSG00000035237, ENSMUSG00000034088	1545	89	18082	2.23551	0.999999	0.351771	6.01106
GOTERM_CC_DIRECT	GO:0000502~proteasome complex	14	0.75594	0.00339568	ENSMUSG00000024583, ENSMUSG00000047879, ENSMUSG00000031897, ENSMUSG00000014769, ENSMUSG00000027566, ENSMUSG00000005625, ENSMUSG00000019303, ENSMUSG00000042541, ENSMUSG00000022193, ENSMUSG00000026750, ENSMUSG00000030603, ENSMUSG00000030751, ENSMUSG00000005312, ENSMUSG00000005779	1677	66	19662	2.48702	0.932616	0.0487239	5.08156
UP_KEYWORDS	Coiled coil	283	15.2808	0.00381055	ENSMUSG00000037958, ENSMUSG00000035189, ENSMUSG00000036934, ENSMUSG00000019774, ENSMUSG00000050856, ENSMUSG00000032504, ENSMUSG00000032503, ENSMUSG00000027457, ENSMUSG00000010086, ENSMUSG00000040446, ENSMUSG00000035439, ENSMUSG00000021124, ENSMUSG00000027309, ENSMUSG00000019761, ENSMUSG00000020115, ENSMUSG00000033769, ENSMUSG00000030122, ENSMUSG00000022771, ENSMUSG00000021279, ENSMUSG00000027770,…	1800	3076	22680	1.15923	0.799573	0.0316349	5.22341
GOTERM_CC_DIRECT	GO:0031305~integral component of mitochondrial inner membrane	7	0.37797	0.00390286	ENSMUSG00000009647, ENSMUSG00000013701, ENSMUSG00000017188, ENSMUSG00000023452, ENSMUSG00000071654, ENSMUSG00000029319, ENSMUSG00000062729	1677	19	19662	4.31956	0.954997	0.0548222	5.81949
GOTERM_CC_DIRECT	GO:0005761~mitochondrial ribosome	8	0.431965	0.00393508	ENSMUSG00000022706, ENSMUSG00000037531, ENSMUSG00000028622, ENSMUSG00000020477, ENSMUSG00000045948, ENSMUSG00000068921, ENSMUSG00000022370, ENSMUSG00000007338	1677	25	19662	3.75184	0.956137	0.0543034	5.86619
GOTERM_BP_DIRECT	GO:1903861~positive regulation of dendrite extension	7	0.37797	0.00393517	ENSMUSG00000038780, ENSMUSG00000034799, ENSMUSG00000041670, ENSMUSG00000035864, ENSMUSG00000024261, ENSMUSG00000024008, ENSMUSG00000058420	1545	19	18082	4.31184	1	0.392984	7.09729
GOTERM_BP_DIRECT	GO:0021762~substantia nigra development	10	0.539957	0.0039536	ENSMUSG00000045763, ENSMUSG00000027669, ENSMUSG00000036438, ENSMUSG00000022890, ENSMUSG00000001270, ENSMUSG00000004558, ENSMUSG00000036751, ENSMUSG00000019370, ENSMUSG00000007021, ENSMUSG00000000563	1545	38	18082	3.07988	1	0.385405	7.12938
GOTERM_BP_DIRECT	GO:0008652~cellular amino acid biosynthetic process	8	0.431965	0.00397125	ENSMUSG00000024640, ENSMUSG00000029752, ENSMUSG00000053398, ENSMUSG00000030268, ENSMUSG00000028179, ENSMUSG00000025140, ENSMUSG00000024039, ENSMUSG00000025190	1545	25	18082	3.74514	1	0.378113	7.1601
GOTERM_CC_DIRECT	GO:0014069~postsynaptic density	34	1.83585	0.00399376	ENSMUSG00000036078, ENSMUSG00000026121, ENSMUSG00000041670, ENSMUSG00000024873, ENSMUSG00000002459, ENSMUSG00000025085, ENSMUSG00000037703, ENSMUSG00000029544, ENSMUSG00000041263, ENSMUSG00000002458, ENSMUSG00000021820, ENSMUSG00000034675, ENSMUSG00000071658, ENSMUSG00000032589, ENSMUSG00000059456, ENSMUSG00000034187, ENSMUSG00000022285, ENSMUSG00000057897, ENSMUSG00000078484, ENSMUSG00000003872,…	1677	239	19662	1.66792	0.958139	0.0541522	5.95118
GOTERM_CC_DIRECT	GO:0055037~recycling endosome	20	1.07991	0.00423894	ENSMUSG00000035805, ENSMUSG00000028955, ENSMUSG00000050732, ENSMUSG00000026927, ENSMUSG00000051343, ENSMUSG00000072235, ENSMUSG00000033124, ENSMUSG00000051355, ENSMUSG00000027546, ENSMUSG00000057506, ENSMUSG00000037872, ENSMUSG00000028557, ENSMUSG00000025375, ENSMUSG00000024797, ENSMUSG00000033389, ENSMUSG00000023030, ENSMUSG00000038524, ENSMUSG00000021038, ENSMUSG00000068923, ENSMUSG00000021124	1677	116	19662	2.02147	0.965563	0.0564252	6.30551
GOTERM_CC_DIRECT	GO:0005793~endoplasmic reticulum-Golgi intermediate compartment	14	0.75594	0.00444402	ENSMUSG00000019579, ENSMUSG00000021484, ENSMUSG00000021248, ENSMUSG00000030824, ENSMUSG00000025130, ENSMUSG00000001143, ENSMUSG00000032180, ENSMUSG00000032353, ENSMUSG00000024539, ENSMUSG00000033184, ENSMUSG00000057103, ENSMUSG00000029048, ENSMUSG00000014867, ENSMUSG00000066551	1677	68	19662	2.41387	0.970753	0.0581072	6.60095
GOTERM_CC_DIRECT	GO:0005884~actin filament	14	0.75594	0.00444402	ENSMUSG00000024969, ENSMUSG00000024397, ENSMUSG00000052397, ENSMUSG00000001847, ENSMUSG00000020173, ENSMUSG00000075284, ENSMUSG00000030707, ENSMUSG00000031523, ENSMUSG00000066151, ENSMUSG00000034675, ENSMUSG00000022099, ENSMUSG00000031078, ENSMUSG00000039137, ENSMUSG00000015143	1677	68	19662	2.41387	0.970753	0.0581072	6.60095
GOTERM_BP_DIRECT	GO:0006914~autophagy	23	1.2419	0.0044982	ENSMUSG00000027291, ENSMUSG00000021619, ENSMUSG00000026792, ENSMUSG00000024413, ENSMUSG00000050732, ENSMUSG00000028964, ENSMUSG00000033124, ENSMUSG00000029434, ENSMUSG00000002320, ENSMUSG00000056071, ENSMUSG00000034789, ENSMUSG00000023923, ENSMUSG00000024797, ENSMUSG00000021814, ENSMUSG00000028756, ENSMUSG00000022620, ENSMUSG00000005312, ENSMUSG00000038520, ENSMUSG00000035629, ENSMUSG00000039735,…	1545	142	18082	1.89565	1	0.40739	8.07288
GOTERM_CC_DIRECT	GO:0097449~astrocyte projection	5	0.269978	0.00467172	ENSMUSG00000020932, ENSMUSG00000024261, ENSMUSG00000052397, ENSMUSG00000028756, ENSMUSG00000037624	1677	9	19662	6.51362	0.975604	0.060013	6.92793
UP_KEYWORDS	Antioxidant	6	0.323974	0.00477412	ENSMUSG00000041571, ENSMUSG00000056071, ENSMUSG00000021792, ENSMUSG00000024953, ENSMUSG00000024997, ENSMUSG00000026701	1800	15	22680	5.04	0.866642	0.0387341	6.50349
UP_KEYWORDS	Myristate	25	1.34989	0.00479874	ENSMUSG00000038633, ENSMUSG00000022722, ENSMUSG00000062563, ENSMUSG00000027636, ENSMUSG00000032562, ENSMUSG00000029544, ENSMUSG00000025035, ENSMUSG00000030788, ENSMUSG00000021263, ENSMUSG00000054459, ENSMUSG00000030086, ENSMUSG00000028785, ENSMUSG00000032589, ENSMUSG00000030350, ENSMUSG00000054733, ENSMUSG00000048787, ENSMUSG00000040351, ENSMUSG00000036306, ENSMUSG00000005034, ENSMUSG00000039166,…	1800	172	22680	1.8314	0.868024	0.0381963	6.53599
GOTERM_CC_DIRECT	GO:0031966~mitochondrial membrane	18	0.971922	0.00499398	ENSMUSG00000022450, ENSMUSG00000048967, ENSMUSG00000024978, ENSMUSG00000026003, ENSMUSG00000033720, ENSMUSG00000014294, ENSMUSG00000036199, ENSMUSG00000062729, ENSMUSG00000028982, ENSMUSG00000000399, ENSMUSG00000016128, ENSMUSG00000027457, ENSMUSG00000071014, ENSMUSG00000029545, ENSMUSG00000038462, ENSMUSG00000030614, ENSMUSG00000053310, ENSMUSG00000091803, ENSMUSG00000026825	1677	101	19662	2.08952	0.981129	0.0630116	7.38889
GOTERM_BP_DIRECT	GO:0008344~adult locomotory behavior	14	0.75594	0.00512542	ENSMUSG00000004319, ENSMUSG00000028964, ENSMUSG00000040907, ENSMUSG00000022523, ENSMUSG00000061436, ENSMUSG00000025889, ENSMUSG00000000184, ENSMUSG00000061751, ENSMUSG00000025551, ENSMUSG00000023064, ENSMUSG00000026959, ENSMUSG00000026826, ENSMUSG00000026825, ENSMUSG00000020644	1545	69	18082	2.37464	1	0.440239	9.14826
GOTERM_CC_DIRECT	GO:0005839~proteasome core complex	7	0.37797	0.00517867	ENSMUSG00000022193, ENSMUSG00000026750, ENSMUSG00000030751, ENSMUSG00000031897, ENSMUSG00000014769, ENSMUSG00000005779, ENSMUSG00000027566	1677	20	19662	4.10358	0.983713	0.0642519	7.65211
GOTERM_BP_DIRECT	GO:0061003~positive regulation of dendritic spine morphogenesis	7	0.37797	0.00522097	ENSMUSG00000002489, ENSMUSG00000042453, ENSMUSG00000042589, ENSMUSG00000061751, ENSMUSG00000034675, ENSMUSG00000025920, ENSMUSG00000057897	1545	20	18082	4.09625	1	0.437596	9.31104
UP_KEYWORDS	Nucleotide-binding	169	9.12527	0.00536081	ENSMUSG00000024969, ENSMUSG00000004319, ENSMUSG00000031974, ENSMUSG00000053137, ENSMUSG00000047842, ENSMUSG00000020076, ENSMUSG00000001847, ENSMUSG00000020079, ENSMUSG00000006517, ENSMUSG00000021266, ENSMUSG00000015961, ENSMUSG00000091971, ENSMUSG00000058672, ENSMUSG00000021820, ENSMUSG00000022789, ENSMUSG00000019979, ENSMUSG00000053693, ENSMUSG00000042249, ENSMUSG00000052981, ENSMUSG00000034187,…	1800	1754	22680	1.21403	0.895959	0.0417988	7.275
GOTERM_BP_DIRECT	GO:0006694~steroid biosynthetic process	13	0.701944	0.00561992	ENSMUSG00000059743, ENSMUSG00000032018, ENSMUSG00000026675, ENSMUSG00000027195, ENSMUSG00000001467, ENSMUSG00000021670, ENSMUSG00000006517, ENSMUSG00000021252, ENSMUSG00000024799, ENSMUSG00000021273, ENSMUSG00000032051, ENSMUSG00000031604, ENSMUSG00000028470	1545	62	18082	2.45397	1	0.453242	9.98769
GOTERM_BP_DIRECT	GO:0030900~forebrain development	16	0.863931	0.00585983	ENSMUSG00000026923, ENSMUSG00000029167, ENSMUSG00000031996, ENSMUSG00000069171, ENSMUSG00000021743, ENSMUSG00000042292, ENSMUSG00000029475, ENSMUSG00000031523, ENSMUSG00000008575, ENSMUSG00000030551, ENSMUSG00000042453, ENSMUSG00000054008, ENSMUSG00000019979, ENSMUSG00000055421, ENSMUSG00000090100, ENSMUSG00000024163	1545	86	18082	2.17741	1	0.458742	10.3923
UP_KEYWORDS	Chloride	13	0.701944	0.00599191	ENSMUSG00000074264, ENSMUSG00000020436, ENSMUSG00000004319, ENSMUSG00000055078, ENSMUSG00000036570, ENSMUSG00000010803, ENSMUSG00000029211, ENSMUSG00000020428, ENSMUSG00000000560, ENSMUSG00000057092, ENSMUSG00000022843, ENSMUSG00000029054, ENSMUSG00000029016	1800	67	22680	2.44478	0.920356	0.0457745	8.09833
GOTERM_CC_DIRECT	GO:0031901~early endosome membrane	16	0.863931	0.0064445	ENSMUSG00000027534, ENSMUSG00000019785, ENSMUSG00000050732, ENSMUSG00000004319, ENSMUSG00000051343, ENSMUSG00000003200, ENSMUSG00000020375, ENSMUSG00000027546, ENSMUSG00000031021, ENSMUSG00000032560, ENSMUSG00000001847, ENSMUSG00000019173, ENSMUSG00000055371, ENSMUSG00000029560, ENSMUSG00000026347, ENSMUSG00000000711	1677	87	19662	2.15623	0.994066	0.078158	9.4374
GOTERM_BP_DIRECT	GO:0014059~regulation of dopamine secretion	6	0.323974	0.006542	ENSMUSG00000025889, ENSMUSG00000027950, ENSMUSG00000057531, ENSMUSG00000023064, ENSMUSG00000035864, ENSMUSG00000024261	1545	15	18082	4.68142	1	0.487696	11.5334
GOTERM_BP_DIRECT	GO:0048490~anterograde synaptic vesicle transport	6	0.323974	0.006542	ENSMUSG00000021824, ENSMUSG00000057531, ENSMUSG00000057506, ENSMUSG00000063801, ENSMUSG00000090247, ENSMUSG00000062444	1545	15	18082	4.68142	1	0.487696	11.5334
GOTERM_BP_DIRECT	GO:0035556~intracellular signal transduction	50	2.69978	0.00659873	ENSMUSG00000027347, ENSMUSG00000024969, ENSMUSG00000022490, ENSMUSG00000050711, ENSMUSG00000053137, ENSMUSG00000021662, ENSMUSG00000057455, ENSMUSG00000035109, ENSMUSG00000002413, ENSMUSG00000022994, ENSMUSG00000026430, ENSMUSG00000020027, ENSMUSG00000053693, ENSMUSG00000028944, ENSMUSG00000055322, ENSMUSG00000037989, ENSMUSG00000056153, ENSMUSG00000039621, ENSMUSG00000056486, ENSMUSG00000034853,…	1545	400	18082	1.46294	1	0.48242	11.6277
GOTERM_CC_DIRECT	GO:0060077~inhibitory synapse	7	0.37797	0.00673513	ENSMUSG00000020436, ENSMUSG00000004319, ENSMUSG00000000560, ENSMUSG00000040797, ENSMUSG00000051790, ENSMUSG00000032589, ENSMUSG00000068923	1677	21	19662	3.90817	0.995295	0.0803249	9.84272
GOTERM_BP_DIRECT	GO:0006631~fatty acid metabolic process	24	1.2959	0.00689484	ENSMUSG00000032281, ENSMUSG00000038633, ENSMUSG00000024978, ENSMUSG00000026003, ENSMUSG00000063275, ENSMUSG00000007783, ENSMUSG00000031545, ENSMUSG00000025745, ENSMUSG00000025153, ENSMUSG00000021606, ENSMUSG00000026853, ENSMUSG00000034853, ENSMUSG00000030869, ENSMUSG00000015090, ENSMUSG00000029545, ENSMUSG00000024665, ENSMUSG00000025889, ENSMUSG00000000214, ENSMUSG00000018574, ENSMUSG00000029059,…	1545	156	18082	1.80055	1	0.489437	12.1182
UP_KEYWORDS	Lipid-binding	27	1.45788	0.00717082	ENSMUSG00000027534, ENSMUSG00000024969, ENSMUSG00000017978, ENSMUSG00000020375, ENSMUSG00000003200, ENSMUSG00000018770, ENSMUSG00000006057, ENSMUSG00000062683, ENSMUSG00000020435, ENSMUSG00000016664, ENSMUSG00000022789, ENSMUSG00000029560, ENSMUSG00000001036, ENSMUSG00000040430, ENSMUSG00000054423, ENSMUSG00000019785, ENSMUSG00000020876, ENSMUSG00000037062, ENSMUSG00000031557, ENSMUSG00000029406,…	1800	197	22680	1.7269	0.951674	0.0535973	9.61813
GOTERM_BP_DIRECT	GO:0010977~negative regulation of neuron projection development	13	0.701944	0.00729788	ENSMUSG00000052593, ENSMUSG00000049792, ENSMUSG00000034570, ENSMUSG00000030806, ENSMUSG00000020932, ENSMUSG00000069171, ENSMUSG00000057455, ENSMUSG00000020184, ENSMUSG00000059974, ENSMUSG00000022994, ENSMUSG00000056222, ENSMUSG00000032737, ENSMUSG00000038807	1545	64	18082	2.37729	1	0.501179	12.7817
GOTERM_BP_DIRECT	GO:0048679~regulation of axon regeneration	5	0.269978	0.00730829	ENSMUSG00000052593, ENSMUSG00000033295, ENSMUSG00000032340, ENSMUSG00000004936, ENSMUSG00000002413	1545	10	18082	5.85178	1	0.493903	12.7988
UP_KEYWORDS	Neurotransmitter transport	9	0.485961	0.00744938	ENSMUSG00000030806, ENSMUSG00000039714, ENSMUSG00000041670, ENSMUSG00000027894, ENSMUSG00000033615, ENSMUSG00000035226, ENSMUSG00000041488, ENSMUSG00000062995, ENSMUSG00000053025	1800	37	22680	3.06486	0.957059	0.0546623	9.97383
GOTERM_BP_DIRECT	GO:0006906~vesicle fusion	11	0.593952	0.00754128	ENSMUSG00000027457, ENSMUSG00000050732, ENSMUSG00000035864, ENSMUSG00000024261, ENSMUSG00000020848, ENSMUSG00000010392, ENSMUSG00000058420, ENSMUSG00000029608, ENSMUSG00000041488, ENSMUSG00000004961, ENSMUSG00000068923	1545	49	18082	2.62733	1	0.497189	13.1801
GOTERM_BP_DIRECT	GO:0007269~neurotransmitter secretion	8	0.431965	0.00780665	ENSMUSG00000030093, ENSMUSG00000034799, ENSMUSG00000041670, ENSMUSG00000035864, ENSMUSG00000024261, ENSMUSG00000003872, ENSMUSG00000033419, ENSMUSG00000026797	1545	28	18082	3.34387	1	0.501765	13.6125
GOTERM_BP_DIRECT	GO:0030433~ER-associated ubiquitin-dependent protein catabolic process	12	0.647948	0.00802877	ENSMUSG00000039703, ENSMUSG00000030603, ENSMUSG00000040462, ENSMUSG00000059890, ENSMUSG00000005312, ENSMUSG00000022365, ENSMUSG00000052906, ENSMUSG00000018442, ENSMUSG00000038312, ENSMUSG00000031751, ENSMUSG00000019295, ENSMUSG00000078622	1545	57	18082	2.46391	1	0.504237	13.9729
UP_KEYWORDS	S-nitrosylation	11	0.593952	0.00803954	ENSMUSG00000018574, ENSMUSG00000022789, ENSMUSG00000029392, ENSMUSG00000035692, ENSMUSG00000027712, ENSMUSG00000028367, ENSMUSG00000031633, ENSMUSG00000052397, ENSMUSG00000025499, ENSMUSG00000031934, ENSMUSG00000049892	1800	53	22680	2.61509	0.966571	0.0578773	10.7231
UP_KEYWORDS	Calcium	86	4.64363	0.00818493	ENSMUSG00000027347, ENSMUSG00000050711, ENSMUSG00000093803, ENSMUSG00000056124, ENSMUSG00000030218, ENSMUSG00000017978, ENSMUSG00000020848, ENSMUSG00000024261, ENSMUSG00000032507, ENSMUSG00000027489, ENSMUSG00000028207, ENSMUSG00000019370, ENSMUSG00000027488, ENSMUSG00000034868, ENSMUSG00000022887, ENSMUSG00000029544, ENSMUSG00000005716, ENSMUSG00000017412, ENSMUSG00000051375, ENSMUSG00000036438,…	1800	827	22680	1.31028	0.968571	0.0579112	10.9068
GOTERM_BP_DIRECT	GO:0016192~vesicle-mediated transport	30	1.61987	0.00822794	ENSMUSG00000050732, ENSMUSG00000029434, ENSMUSG00000021248, ENSMUSG00000063801, ENSMUSG00000047547, ENSMUSG00000070939, ENSMUSG00000026797, ENSMUSG00000027438, ENSMUSG00000021824, ENSMUSG00000000743, ENSMUSG00000041488, ENSMUSG00000034187, ENSMUSG00000021124, ENSMUSG00000035805, ENSMUSG00000027291, ENSMUSG00000028955, ENSMUSG00000030806, ENSMUSG00000022159, ENSMUSG00000020946, ENSMUSG00000050908,…	1545	213	18082	1.64839	1	0.505624	14.2948
UP_KEYWORDS	Autophagy	19	1.02592	0.00831278	ENSMUSG00000027291, ENSMUSG00000021619, ENSMUSG00000026792, ENSMUSG00000050732, ENSMUSG00000028964, ENSMUSG00000033124, ENSMUSG00000002320, ENSMUSG00000029434, ENSMUSG00000056071, ENSMUSG00000034789, ENSMUSG00000023923, ENSMUSG00000028756, ENSMUSG00000005312, ENSMUSG00000038520, ENSMUSG00000035629, ENSMUSG00000039735, ENSMUSG00000062762, ENSMUSG00000066551, ENSMUSG00000015837	1800	123	22680	1.94634	0.970232	0.0578253	11.068
UP_KEYWORDS	Isopeptide bond	97	5.23758	0.00858246	ENSMUSG00000037958, ENSMUSG00000032777, ENSMUSG00000057156, ENSMUSG00000020475, ENSMUSG00000024966, ENSMUSG00000099083, ENSMUSG00000001847, ENSMUSG00000024327, ENSMUSG00000019370, ENSMUSG00000003038, ENSMUSG00000029475, ENSMUSG00000045210, ENSMUSG00000002413, ENSMUSG00000024054, ENSMUSG00000030785, ENSMUSG00000018574, ENSMUSG00000044894, ENSMUSG00000060639, ENSMUSG00000036438, ENSMUSG00000059208,…	1800	953	22680	1.28248	0.973452	0.0586876	11.4073
GOTERM_BP_DIRECT	GO:2000310~regulation of N-methyl-D-aspartate selective glutamate receptor activity	6	0.323974	0.00885599	ENSMUSG00000021680, ENSMUSG00000042453, ENSMUSG00000029167, ENSMUSG00000021708, ENSMUSG00000024873, ENSMUSG00000059456	1545	16	18082	4.38883	1	0.524459	15.3025
UP_KEYWORDS	Chloride channel	10	0.539957	0.00918007	ENSMUSG00000020436, ENSMUSG00000055078, ENSMUSG00000036570, ENSMUSG00000010803, ENSMUSG00000029211, ENSMUSG00000020428, ENSMUSG00000000560, ENSMUSG00000057092, ENSMUSG00000022843, ENSMUSG00000029054	1800	46	22680	2.73913	0.979404	0.0616668	12.1547
GOTERM_BP_DIRECT	GO:0030036~actin cytoskeleton organization	22	1.1879	0.00921621	ENSMUSG00000004530, ENSMUSG00000021493, ENSMUSG00000025147, ENSMUSG00000020846, ENSMUSG00000042292, ENSMUSG00000020388, ENSMUSG00000078484, ENSMUSG00000030720, ENSMUSG00000022508, ENSMUSG00000001847, ENSMUSG00000075284, ENSMUSG00000030707, ENSMUSG00000031523, ENSMUSG00000032875, ENSMUSG00000021279, ENSMUSG00000024346, ENSMUSG00000016664, ENSMUSG00000000416, ENSMUSG00000022099, ENSMUSG00000032735,…	1545	142	18082	1.81323	1	0.531635	15.8754
GOTERM_BP_DIRECT	GO:0043524~negative regulation of neuron apoptotic process	24	1.2959	0.00931072	ENSMUSG00000052684, ENSMUSG00000034891, ENSMUSG00000029167, ENSMUSG00000006906, ENSMUSG00000028964, ENSMUSG00000055078, ENSMUSG00000018166, ENSMUSG00000030720, ENSMUSG00000026797, ENSMUSG00000029475, ENSMUSG00000024997, ENSMUSG00000030707, ENSMUSG00000002413, ENSMUSG00000061436, ENSMUSG00000025889, ENSMUSG00000026959, ENSMUSG00000022674, ENSMUSG00000051149, ENSMUSG00000026826, ENSMUSG00000028756,…	1545	160	18082	1.75553	1	0.528382	16.0251
GOTERM_BP_DIRECT	GO:0006633~fatty acid biosynthetic process	14	0.75594	0.00933848	ENSMUSG00000038633, ENSMUSG00000032018, ENSMUSG00000063275, ENSMUSG00000027195, ENSMUSG00000025153, ENSMUSG00000020917, ENSMUSG00000015090, ENSMUSG00000030869, ENSMUSG00000032527, ENSMUSG00000024665, ENSMUSG00000029059, ENSMUSG00000028127, ENSMUSG00000031604, ENSMUSG00000028944	1545	74	18082	2.21419	1	0.522701	16.069
GOTERM_BP_DIRECT	GO:0006972~hyperosmotic response	4	0.215983	0.0102045	ENSMUSG00000004366, ENSMUSG00000026986, ENSMUSG00000057672, ENSMUSG00000001847	1545	6	18082	7.80237	1	0.547778	17.4284
GOTERM_CC_DIRECT	GO:0072546~ER membrane protein complex	5	0.269978	0.0106536	ENSMUSG00000030286, ENSMUSG00000027131, ENSMUSG00000022217, ENSMUSG00000008140, ENSMUSG00000047260	1677	11	19662	5.32932	0.999795	0.122493	15.1445
GOTERM_BP_DIRECT	GO:0016082~synaptic vesicle priming	5	0.269978	0.0107165	ENSMUSG00000054423, ENSMUSG00000034799, ENSMUSG00000017978, ENSMUSG00000062151, ENSMUSG00000009894	1545	11	18082	5.3198	1	0.558887	18.2221
GOTERM_BP_DIRECT	GO:0016242~negative regulation of macroautophagy	5	0.269978	0.0107165	ENSMUSG00000024413, ENSMUSG00000030720, ENSMUSG00000028756, ENSMUSG00000036306, ENSMUSG00000033684	1545	11	18082	5.3198	1	0.558887	18.2221
GOTERM_CC_DIRECT	GO:0005762~mitochondrial large ribosomal subunit	9	0.485961	0.0113042	ENSMUSG00000036850, ENSMUSG00000030612, ENSMUSG00000026273, ENSMUSG00000033845, ENSMUSG00000037531, ENSMUSG00000015672, ENSMUSG00000025208, ENSMUSG00000022370, ENSMUSG00000007338	1677	37	19662	2.85191	0.999878	0.127677	15.9961
GOTERM_BP_DIRECT	GO:0002479~antigen processing and presentation of exogenous peptide antigen via MHC class I, TAP-dependent	8	0.431965	0.0115561	ENSMUSG00000022193, ENSMUSG00000026750, ENSMUSG00000030751, ENSMUSG00000031897, ENSMUSG00000014769, ENSMUSG00000003814, ENSMUSG00000005779, ENSMUSG00000027566	1545	30	18082	3.12095	1	0.57987	19.5084
UP_KEYWORDS	Endocytosis	18	0.971922	0.0117714	ENSMUSG00000003200, ENSMUSG00000020375, ENSMUSG00000090935, ENSMUSG00000066151, ENSMUSG00000022999, ENSMUSG00000037601, ENSMUSG00000025468, ENSMUSG00000016664, ENSMUSG00000022789, ENSMUSG00000022305, ENSMUSG00000070000, ENSMUSG00000031078, ENSMUSG00000026825, ENSMUSG00000028923, ENSMUSG00000035629, ENSMUSG00000039735, ENSMUSG00000032733, ENSMUSG00000001036	1800	118	22680	1.92203	0.993161	0.0772584	15.3286
GOTERM_CC_DIRECT	GO:0044297~cell body	17	0.917927	0.0123699	ENSMUSG00000027669, ENSMUSG00000028964, ENSMUSG00000020932, ENSMUSG00000055078, ENSMUSG00000039536, ENSMUSG00000052397, ENSMUSG00000036306, ENSMUSG00000032562, ENSMUSG00000057455, ENSMUSG00000002413, ENSMUSG00000028070, ENSMUSG00000071658, ENSMUSG00000028756, ENSMUSG00000028495, ENSMUSG00000037196, ENSMUSG00000059456, ENSMUSG00000068923	1677	102	19662	1.95408	0.999948	0.136983	17.3737
GOTERM_BP_DIRECT	GO:0051402~neuron apoptotic process	10	0.539957	0.0125419	ENSMUSG00000036840, ENSMUSG00000025375, ENSMUSG00000003955, ENSMUSG00000022105, ENSMUSG00000029433, ENSMUSG00000019979, ENSMUSG00000018166, ENSMUSG00000059436, ENSMUSG00000031536, ENSMUSG00000031878	1545	45	18082	2.60079	1	0.603514	20.9941
GOTERM_BP_DIRECT	GO:0006836~neurotransmitter transport	10	0.539957	0.0125419	ENSMUSG00000030806, ENSMUSG00000039714, ENSMUSG00000041670, ENSMUSG00000027894, ENSMUSG00000033615, ENSMUSG00000000560, ENSMUSG00000035226, ENSMUSG00000041488, ENSMUSG00000062995, ENSMUSG00000053025	1545	45	18082	2.60079	1	0.603514	20.9941
GOTERM_CC_DIRECT	GO:0030176~integral component of endoplasmic reticulum membrane	16	0.863931	0.0130256	ENSMUSG00000063275, ENSMUSG00000029924, ENSMUSG00000014748, ENSMUSG00000048486, ENSMUSG00000030654, ENSMUSG00000030720, ENSMUSG00000031545, ENSMUSG00000031751, ENSMUSG00000043207, ENSMUSG00000024799, ENSMUSG00000018999, ENSMUSG00000024889, ENSMUSG00000022365, ENSMUSG00000052906, ENSMUSG00000018442, ENSMUSG00000047260	1677	94	19662	1.99566	0.999969	0.141784	18.2108
GOTERM_CC_DIRECT	GO:0043198~dendritic shaft	12	0.647948	0.0131663	ENSMUSG00000034570, ENSMUSG00000024873, ENSMUSG00000063239, ENSMUSG00000034675, ENSMUSG00000025920, ENSMUSG00000042249, ENSMUSG00000039621, ENSMUSG00000039137, ENSMUSG00000036306, ENSMUSG00000051790, ENSMUSG00000022208, ENSMUSG00000034187	1677	61	19662	2.30646	0.999973	0.141288	18.3893
GOTERM_BP_DIRECT	GO:0016236~macroautophagy	7	0.37797	0.0135085	ENSMUSG00000021619, ENSMUSG00000042628, ENSMUSG00000030720, ENSMUSG00000005312, ENSMUSG00000001750, ENSMUSG00000015837, ENSMUSG00000062762	1545	24	18082	3.41354	1	0.62458	22.4256
GOTERM_BP_DIRECT	GO:0000209~protein polyubiquitination	17	0.917927	0.0137093	ENSMUSG00000026792, ENSMUSG00000040351, ENSMUSG00000038780, ENSMUSG00000031529, ENSMUSG00000038965, ENSMUSG00000021774, ENSMUSG00000039615, ENSMUSG00000059890, ENSMUSG00000027466, ENSMUSG00000022771, ENSMUSG00000031751, ENSMUSG00000057367, ENSMUSG00000019295, ENSMUSG00000020390, ENSMUSG00000041263, ENSMUSG00000064145, ENSMUSG00000020642	1545	103	18082	1.93166	1	0.623758	22.7199
UP_KEYWORDS	Potassium	18	0.971922	0.0137895	ENSMUSG00000016346, ENSMUSG00000047976, ENSMUSG00000038077, ENSMUSG00000040907, ENSMUSG00000026576, ENSMUSG00000027895, ENSMUSG00000060376, ENSMUSG00000044216, ENSMUSG00000029088, ENSMUSG00000028931, ENSMUSG00000028070, ENSMUSG00000017765, ENSMUSG00000041329, ENSMUSG00000053519, ENSMUSG00000003500, ENSMUSG00000038026, ENSMUSG00000037624, ENSMUSG00000032047	1800	120	22680	1.89	0.997108	0.088615	17.7261
GOTERM_CC_DIRECT	GO:0030141~secretory granule	18	0.971922	0.01387	ENSMUSG00000021680, ENSMUSG00000028955, ENSMUSG00000033061, ENSMUSG00000050732, ENSMUSG00000050711, ENSMUSG00000004319, ENSMUSG00000037852, ENSMUSG00000051343, ENSMUSG00000032570, ENSMUSG00000035640, ENSMUSG00000021647, ENSMUSG00000038742, ENSMUSG00000021477, ENSMUSG00000035864, ENSMUSG00000015143, ENSMUSG00000029608, ENSMUSG00000041488, ENSMUSG00000026241	1677	112	19662	1.8843	0.999985	0.146345	19.2771
UP_KEYWORDS	SH3 domain	27	1.45788	0.0140397	ENSMUSG00000034471, ENSMUSG00000003200, ENSMUSG00000027636, ENSMUSG00000026860, ENSMUSG00000055371, ENSMUSG00000026259, ENSMUSG00000041225, ENSMUSG00000017412, ENSMUSG00000016664, ENSMUSG00000041263, ENSMUSG00000020882, ENSMUSG00000021285, ENSMUSG00000032733, ENSMUSG00000089661, ENSMUSG00000027378, ENSMUSG00000029420, ENSMUSG00000037062, ENSMUSG00000052373, ENSMUSG00000017400, ENSMUSG00000024812,…	1800	208	22680	1.63558	0.997401	0.088815	18.019
UP_KEYWORDS	CBS domain	6	0.323974	0.0141699	ENSMUSG00000004319, ENSMUSG00000022843, ENSMUSG00000003500, ENSMUSG00000028944, ENSMUSG00000024039, ENSMUSG00000029016	1800	19	22680	3.97895	0.997541	0.0882902	18.1709
GOTERM_CC_DIRECT	GO:0034707~chloride channel complex	10	0.539957	0.0143016	ENSMUSG00000020436, ENSMUSG00000055078, ENSMUSG00000036570, ENSMUSG00000010803, ENSMUSG00000029211, ENSMUSG00000020428, ENSMUSG00000000560, ENSMUSG00000057092, ENSMUSG00000022843, ENSMUSG00000029054	1677	46	19662	2.54881	0.999989	0.148613	19.8171
GOTERM_BP_DIRECT	GO:0031175~neuron projection development	21	1.13391	0.0144669	ENSMUSG00000022421, ENSMUSG00000025089, ENSMUSG00000026667, ENSMUSG00000039542, ENSMUSG00000053398, ENSMUSG00000042292, ENSMUSG00000028833, ENSMUSG00000057506, ENSMUSG00000025104, ENSMUSG00000041609, ENSMUSG00000070733, ENSMUSG00000028556, ENSMUSG00000022105, ENSMUSG00000057531, ENSMUSG00000069227, ENSMUSG00000027581, ENSMUSG00000090247, ENSMUSG00000041488, ENSMUSG00000026478, ENSMUSG00000059456,…	1545	139	18082	1.76816	1	0.637501	23.8206
GOTERM_BP_DIRECT	GO:0035176~social behavior	11	0.593952	0.0149119	ENSMUSG00000020091, ENSMUSG00000000214, ENSMUSG00000027950, ENSMUSG00000061751, ENSMUSG00000026959, ENSMUSG00000025235, ENSMUSG00000021814, ENSMUSG00000021816, ENSMUSG00000025499, ENSMUSG00000051790, ENSMUSG00000027274	1545	54	18082	2.38406	1	0.642647	24.4603
GOTERM_BP_DIRECT	GO:0045717~negative regulation of fatty acid biosynthetic process	5	0.269978	0.0150033	ENSMUSG00000026003, ENSMUSG00000018574, ENSMUSG00000040564, ENSMUSG00000003721, ENSMUSG00000037622	1545	12	18082	4.87648	1	0.638933	24.5911
GOTERM_BP_DIRECT	GO:0006123~mitochondrial electron transport, cytochrome c to oxygen	5	0.269978	0.0150033	ENSMUSG00000030785, ENSMUSG00000035885, ENSMUSG00000025488, ENSMUSG00000063694, ENSMUSG00000017778	1545	12	18082	4.87648	1	0.638933	24.5911
GOTERM_BP_DIRECT	GO:0032981~mitochondrial respiratory chain complex I assembly	6	0.323974	0.015055	ENSMUSG00000059734, ENSMUSG00000050323, ENSMUSG00000028648, ENSMUSG00000021764, ENSMUSG00000039048, ENSMUSG00000070283	1545	18	18082	3.90119	1	0.634321	24.6649
GOTERM_BP_DIRECT	GO:0051056~regulation of small GTPase mediated signal transduction	6	0.323974	0.015055	ENSMUSG00000038860, ENSMUSG00000030583, ENSMUSG00000040797, ENSMUSG00000002496, ENSMUSG00000056486, ENSMUSG00000038807	1545	18	18082	3.90119	1	0.634321	24.6649
UP_KEYWORDS	Transferase	156	8.42333	0.015432	ENSMUSG00000037664, ENSMUSG00000024969, ENSMUSG00000020471, ENSMUSG00000023832, ENSMUSG00000053137, ENSMUSG00000027199, ENSMUSG00000027198, ENSMUSG00000001844, ENSMUSG00000023021, ENSMUSG00000002797, ENSMUSG00000003271, ENSMUSG00000021820, ENSMUSG00000030316, ENSMUSG00000053693, ENSMUSG00000042249, ENSMUSG00000052981, ENSMUSG00000032047, ENSMUSG00000018865, ENSMUSG00000020115, ENSMUSG00000007783,…	1800	1654	22680	1.18839	0.998566	0.0944428	19.6308
GOTERM_BP_DIRECT	GO:0007030~Golgi organization	14	0.75594	0.0158727	ENSMUSG00000039703, ENSMUSG00000049792, ENSMUSG00000021484, ENSMUSG00000028917, ENSMUSG00000021248, ENSMUSG00000096054, ENSMUSG00000045210, ENSMUSG00000012296, ENSMUSG00000001143, ENSMUSG00000032867, ENSMUSG00000062797, ENSMUSG00000014867, ENSMUSG00000108996, ENSMUSG00000059811, ENSMUSG00000030055	1545	79	18082	2.07405	1	0.648134	25.8242
GOTERM_CC_DIRECT	GO:1904115~axon cytoplasm	8	0.431965	0.0163212	ENSMUSG00000021824, ENSMUSG00000057531, ENSMUSG00000057506, ENSMUSG00000063801, ENSMUSG00000090247, ENSMUSG00000063077, ENSMUSG00000062444, ENSMUSG00000020132	1677	32	19662	2.93113	0.999998	0.165767	22.2993
GOTERM_CC_DIRECT	GO:0012505~endomembrane system	18	0.971922	0.01635	ENSMUSG00000016179, ENSMUSG00000052302, ENSMUSG00000036533, ENSMUSG00000029406, ENSMUSG00000003134, ENSMUSG00000027799, ENSMUSG00000027953, ENSMUSG00000057778, ENSMUSG00000022099, ENSMUSG00000024867, ENSMUSG00000000743, ENSMUSG00000023030, ENSMUSG00000042216, ENSMUSG00000031934, ENSMUSG00000040543, ENSMUSG00000009894, ENSMUSG00000042492, ENSMUSG00000037499	1677	114	19662	1.85124	0.999998	0.16396	22.3342
GOTERM_BP_DIRECT	GO:0006695~cholesterol biosynthetic process	8	0.431965	0.0164584	ENSMUSG00000024799, ENSMUSG00000059743, ENSMUSG00000026675, ENSMUSG00000021273, ENSMUSG00000003721, ENSMUSG00000001467, ENSMUSG00000021670, ENSMUSG00000006517	1545	32	18082	2.92589	1	0.655856	26.644
GOTERM_BP_DIRECT	GO:0030001~metal ion transport	7	0.37797	0.0165203	ENSMUSG00000026576, ENSMUSG00000024270, ENSMUSG00000002105, ENSMUSG00000018585, ENSMUSG00000046822, ENSMUSG00000024327, ENSMUSG00000041654	1545	25	18082	3.277	1	0.65164	26.7302
GOTERM_BP_DIRECT	GO:0010807~regulation of synaptic vesicle priming	4	0.215983	0.0167319	ENSMUSG00000027438, ENSMUSG00000030806, ENSMUSG00000034799, ENSMUSG00000026797	1545	7	18082	6.68775	1	0.650831	27.024
GOTERM_BP_DIRECT	GO:0060296~regulation of cilium beat frequency involved in ciliary motility	4	0.215983	0.0167319	ENSMUSG00000031755, ENSMUSG00000025235, ENSMUSG00000031971, ENSMUSG00000027274	1545	7	18082	6.68775	1	0.650831	27.024
UP_KEYWORDS	Cholesterol biosynthesis	6	0.323974	0.0176854	ENSMUSG00000024799, ENSMUSG00000059743, ENSMUSG00000021273, ENSMUSG00000001467, ENSMUSG00000021670, ENSMUSG00000006517	1800	20	22680	3.78	0.999454	0.106065	22.1773
GOTERM_CC_DIRECT	GO:0042995~cell projection	78	4.21166	0.0178961	ENSMUSG00000046985, ENSMUSG00000036078, ENSMUSG00000075273, ENSMUSG00000021071, ENSMUSG00000020932, ENSMUSG00000024873, ENSMUSG00000059436, ENSMUSG00000029471, ENSMUSG00000004558, ENSMUSG00000001847, ENSMUSG00000020173, ENSMUSG00000026259, ENSMUSG00000066151, ENSMUSG00000022994, ENSMUSG00000025035, ENSMUSG00000034675, ENSMUSG00000039781, ENSMUSG00000000416, ENSMUSG00000027581, ENSMUSG00000031971,…	1677	712	19662	1.28443	0.999999	0.175943	24.185
UP_KEYWORDS	Cytoskeleton	105	5.66955	0.0185234	ENSMUSG00000022451, ENSMUSG00000024969, ENSMUSG00000021071, ENSMUSG00000036533, ENSMUSG00000006717, ENSMUSG00000032504, ENSMUSG00000019370, ENSMUSG00000041263, ENSMUSG00000028441, ENSMUSG00000058672, ENSMUSG00000036438, ENSMUSG00000041775, ENSMUSG00000026430, ENSMUSG00000031971, ENSMUSG00000053693, ENSMUSG00000030064, ENSMUSG00000032589, ENSMUSG00000035439, ENSMUSG00000029600, ENSMUSG00000031516,…	1800	1073	22680	1.23299	0.999619	0.109308	23.105
UP_KEYWORDS	GTPase activation	22	1.1879	0.0187137	ENSMUSG00000038860, ENSMUSG00000019775, ENSMUSG00000030844, ENSMUSG00000003134, ENSMUSG00000056486, ENSMUSG00000031523, ENSMUSG00000016128, ENSMUSG00000041225, ENSMUSG00000030766, ENSMUSG00000026360, ENSMUSG00000023923, ENSMUSG00000030583, ENSMUSG00000033389, ENSMUSG00000041986, ENSMUSG00000038520, ENSMUSG00000002496, ENSMUSG00000073433, ENSMUSG00000042216, ENSMUSG00000038807, ENSMUSG00000030220,…	1800	163	22680	1.70061	0.999648	0.108868	23.3143
UP_KEYWORDS	Pyridoxal phosphate	11	0.593952	0.0188283	ENSMUSG00000021036, ENSMUSG00000024640, ENSMUSG00000030268, ENSMUSG00000028179, ENSMUSG00000018659, ENSMUSG00000027618, ENSMUSG00000021468, ENSMUSG00000025153, ENSMUSG00000024039, ENSMUSG00000031672, ENSMUSG00000025190	1800	60	22680	2.31	0.999665	0.108026	23.44
GOTERM_CC_DIRECT	GO:0016234~inclusion body	6	0.323974	0.0189004	ENSMUSG00000049792, ENSMUSG00000034891, ENSMUSG00000091971, ENSMUSG00000025889, ENSMUSG00000030603, ENSMUSG00000015837	1677	19	19662	3.70248	1	0.182703	25.365
GOTERM_BP_DIRECT	GO:0006783~heme biosynthetic process	6	0.323974	0.0190263	ENSMUSG00000018677, ENSMUSG00000028684, ENSMUSG00000054428, ENSMUSG00000062729, ENSMUSG00000023030, ENSMUSG00000032126	1545	19	18082	3.69586	1	0.692803	30.1387
GOTERM_BP_DIRECT	GO:0022904~respiratory electron transport chain	6	0.323974	0.0190263	ENSMUSG00000029167, ENSMUSG00000028756, ENSMUSG00000030652, ENSMUSG00000068184, ENSMUSG00000021606, ENSMUSG00000023089	1545	19	18082	3.69586	1	0.692803	30.1387
GOTERM_BP_DIRECT	GO:0009607~response to biotic stimulus	6	0.323974	0.0190263	ENSMUSG00000061702, ENSMUSG00000025492, ENSMUSG00000045114, ENSMUSG00000071234, ENSMUSG00000060591, ENSMUSG00000045777	1545	19	18082	3.69586	1	0.692803	30.1387
GOTERM_BP_DIRECT	GO:0007005~mitochondrion organization	14	0.75594	0.0192893	ENSMUSG00000029167, ENSMUSG00000031516, ENSMUSG00000028964, ENSMUSG00000022789, ENSMUSG00000053137, ENSMUSG00000037062, ENSMUSG00000028756, ENSMUSG00000028944, ENSMUSG00000068922, ENSMUSG00000028982, ENSMUSG00000024997, ENSMUSG00000050989, ENSMUSG00000018900, ENSMUSG00000022552	1545	81	18082	2.02284	1	0.692535	30.4876
GOTERM_BP_DIRECT	GO:0043523~regulation of neuron apoptotic process	8	0.431965	0.019392	ENSMUSG00000036078, ENSMUSG00000025889, ENSMUSG00000058709, ENSMUSG00000055078, ENSMUSG00000028964, ENSMUSG00000026959, ENSMUSG00000028756, ENSMUSG00000031878	1545	33	18082	2.83723	1	0.689259	30.6233
GOTERM_BP_DIRECT	GO:1900026~positive regulation of substrate adhesion-dependent cell spreading	8	0.431965	0.019392	ENSMUSG00000018446, ENSMUSG00000034675, ENSMUSG00000022099, ENSMUSG00000003814, ENSMUSG00000039621, ENSMUSG00000001847, ENSMUSG00000022425, ENSMUSG00000002413	1545	33	18082	2.83723	1	0.689259	30.6233
GOTERM_CC_DIRECT	GO:0043194~axon initial segment	5	0.269978	0.0201177	ENSMUSG00000016346, ENSMUSG00000011751, ENSMUSG00000026442, ENSMUSG00000032532, ENSMUSG00000064329	1677	13	19662	4.50943	1	0.191078	26.7722
GOTERM_BP_DIRECT	GO:0090630~activation of GTPase activity	13	0.701944	0.0201673	ENSMUSG00000052302, ENSMUSG00000022568, ENSMUSG00000027347, ENSMUSG00000004530, ENSMUSG00000003134, ENSMUSG00000039976, ENSMUSG00000002489, ENSMUSG00000028556, ENSMUSG00000023923, ENSMUSG00000040797, ENSMUSG00000042216, ENSMUSG00000059456, ENSMUSG00000042492	1545	73	18082	2.0842	1	0.698467	31.6403
GOTERM_BP_DIRECT	GO:0006915~apoptotic process	64	3.45572	0.0203926	ENSMUSG00000029610, ENSMUSG00000051980, ENSMUSG00000031781, ENSMUSG00000029433, ENSMUSG00000060579, ENSMUSG00000032504, ENSMUSG00000031878, ENSMUSG00000035109, ENSMUSG00000027016, ENSMUSG00000017670, ENSMUSG00000014771, ENSMUSG00000024012, ENSMUSG00000024826, ENSMUSG00000019979, ENSMUSG00000026430, ENSMUSG00000060538, ENSMUSG00000036840, ENSMUSG00000036850, ENSMUSG00000019579, ENSMUSG00000003955,…	1545	570	18082	1.31408	1	0.697468	31.9331
GOTERM_BP_DIRECT	GO:0044211~CTP salvage	3	0.161987	0.0206178	ENSMUSG00000002550, ENSMUSG00000089917, ENSMUSG00000026558	1545	3	18082	11.7036	1	0.696493	32.2247
GOTERM_BP_DIRECT	GO:0040018~positive regulation of multicellular organism growth	9	0.485961	0.0208728	ENSMUSG00000031755, ENSMUSG00000024978, ENSMUSG00000011751, ENSMUSG00000048583, ENSMUSG00000014599, ENSMUSG00000025235, ENSMUSG00000052397, ENSMUSG00000027274, ENSMUSG00000031980	1545	41	18082	2.56907	1	0.696065	32.5535
GOTERM_BP_DIRECT	GO:0007399~nervous system development	45	2.42981	0.0210652	ENSMUSG00000033295, ENSMUSG00000036078, ENSMUSG00000036955, ENSMUSG00000034701, ENSMUSG00000020599, ENSMUSG00000028949, ENSMUSG00000025089, ENSMUSG00000026121, ENSMUSG00000069171, ENSMUSG00000056596, ENSMUSG00000048978, ENSMUSG00000021743, ENSMUSG00000032368, ENSMUSG00000004558, ENSMUSG00000041609, ENSMUSG00000026259, ENSMUSG00000037601, ENSMUSG00000019647, ENSMUSG00000040631, ENSMUSG00000027434,…	1545	377	18082	1.39698	1	0.694561	32.8004
UP_KEYWORDS	Osteogenesis	8	0.431965	0.0212266	ENSMUSG00000046985, ENSMUSG00000021493, ENSMUSG00000048583, ENSMUSG00000030218, ENSMUSG00000040297, ENSMUSG00000022098, ENSMUSG00000029755, ENSMUSG00000026241	1800	36	22680	2.8	0.999881	0.11946	26.0281
GOTERM_CC_DIRECT	GO:0005911~cell-cell junction	27	1.45788	0.0213534	ENSMUSG00000022568, ENSMUSG00000022451, ENSMUSG00000034101, ENSMUSG00000028909, ENSMUSG00000016664, ENSMUSG00000051375, ENSMUSG00000034675, ENSMUSG00000021948, ENSMUSG00000026556, ENSMUSG00000041488, ENSMUSG00000031990, ENSMUSG00000052593, ENSMUSG00000035805, ENSMUSG00000024411, ENSMUSG00000021493, ENSMUSG00000039542, ENSMUSG00000027378, ENSMUSG00000003872, ENSMUSG00000030707, ENSMUSG00000029428,…	1677	201	19662	1.57493	1	0.19932	28.1753
UP_KEYWORDS	2Fe-2S	6	0.323974	0.0217318	ENSMUSG00000024099, ENSMUSG00000025968, ENSMUSG00000038462, ENSMUSG00000031781, ENSMUSG00000032051, ENSMUSG00000079677	1800	21	22680	3.6	0.999904	0.120562	26.5628
GOTERM_BP_DIRECT	GO:0051289~protein homotetramerization	13	0.701944	0.0222632	ENSMUSG00000042462, ENSMUSG00000029545, ENSMUSG00000026003, ENSMUSG00000022789, ENSMUSG00000054428, ENSMUSG00000021196, ENSMUSG00000028070, ENSMUSG00000028179, ENSMUSG00000006717, ENSMUSG00000027187, ENSMUSG00000030695, ENSMUSG00000028755, ENSMUSG00000068923	1545	74	18082	2.05603	1	0.709955	34.3194
GOTERM_CC_DIRECT	GO:0005795~Golgi stack	8	0.431965	0.0224883	ENSMUSG00000031835, ENSMUSG00000042628, ENSMUSG00000006800, ENSMUSG00000030720, ENSMUSG00000020541, ENSMUSG00000062995, ENSMUSG00000045210, ENSMUSG00000034187	1677	34	19662	2.75871	1	0.206452	29.4419
GOTERM_CC_DIRECT	GO:0016529~sarcoplasmic reticulum	11	0.593952	0.023656	ENSMUSG00000021820, ENSMUSG00000020882, ENSMUSG00000027944, ENSMUSG00000003814, ENSMUSG00000034659, ENSMUSG00000103476, ENSMUSG00000028207, ENSMUSG00000020635, ENSMUSG00000039166, ENSMUSG00000049892, ENSMUSG00000057897	1677	58	19662	2.22361	1	0.213617	30.7232
GOTERM_BP_DIRECT	GO:0050885~neuromuscular process controlling balance	11	0.593952	0.0238952	ENSMUSG00000030302, ENSMUSG00000033565, ENSMUSG00000031996, ENSMUSG00000021684, ENSMUSG00000030720, ENSMUSG00000051790, ENSMUSG00000068696, ENSMUSG00000022208, ENSMUSG00000014592, ENSMUSG00000062762, ENSMUSG00000057897	1545	58	18082	2.21964	1	0.730797	36.3364
GOTERM_BP_DIRECT	GO:0006457~protein folding	19	1.02592	0.0242262	ENSMUSG00000024309, ENSMUSG00000024583, ENSMUSG00000028367, ENSMUSG00000020949, ENSMUSG00000005354, ENSMUSG00000039615, ENSMUSG00000003814, ENSMUSG00000056629, ENSMUSG00000025823, ENSMUSG00000025130, ENSMUSG00000022771, ENSMUSG00000005981, ENSMUSG00000066151, ENSMUSG00000043510, ENSMUSG00000036327, ENSMUSG00000024346, ENSMUSG00000027274, ENSMUSG00000020635, ENSMUSG00000033684	1545	128	18082	1.73725	1	0.731158	36.7383
GOTERM_BP_DIRECT	GO:0051384~response to glucocorticoid	13	0.701944	0.0245156	ENSMUSG00000032281, ENSMUSG00000024397, ENSMUSG00000026986, ENSMUSG00000004936, ENSMUSG00000018593, ENSMUSG00000030711, ENSMUSG00000025190, ENSMUSG00000028909, ENSMUSG00000015090, ENSMUSG00000021477, ENSMUSG00000035237, ENSMUSG00000027792, ENSMUSG00000066551	1545	75	18082	2.02862	1	0.730905	37.0877
UP_KEYWORDS	Tumor suppressor	18	0.971922	0.0246789	ENSMUSG00000030793, ENSMUSG00000028964, ENSMUSG00000029454, ENSMUSG00000004558, ENSMUSG00000037060, ENSMUSG00000036306, ENSMUSG00000041120, ENSMUSG00000031660, ENSMUSG00000031523, ENSMUSG00000061436, ENSMUSG00000022105, ENSMUSG00000021948, ENSMUSG00000022099, ENSMUSG00000026430, ENSMUSG00000029394, ENSMUSG00000002496, ENSMUSG00000027339, ENSMUSG00000096472	1800	128	22680	1.77187	0.999973	0.134209	29.6112
GOTERM_BP_DIRECT	GO:0019227~neuronal action potential propagation	4	0.215983	0.0250912	ENSMUSG00000017412, ENSMUSG00000019194, ENSMUSG00000020635, ENSMUSG00000064329	1545	8	18082	5.85178	1	0.734757	37.7772
GOTERM_BP_DIRECT	GO:0001956~positive regulation of neurotransmitter secretion	4	0.215983	0.0250912	ENSMUSG00000030806, ENSMUSG00000025889, ENSMUSG00000034799, ENSMUSG00000057531	1545	8	18082	5.85178	1	0.734757	37.7772
GOTERM_BP_DIRECT	GO:0006919~activation of cysteine-type endopeptidase activity involved in apoptotic process	12	0.647948	0.0256867	ENSMUSG00000030793, ENSMUSG00000025889, ENSMUSG00000056071, ENSMUSG00000003955, ENSMUSG00000029433, ENSMUSG00000014771, ENSMUSG00000019979, ENSMUSG00000024012, ENSMUSG00000032532, ENSMUSG00000021576, ENSMUSG00000051234, ENSMUSG00000031523	1545	67	18082	2.09616	1	0.73874	38.4829
GOTERM_CC_DIRECT	GO:0030659~cytoplasmic vesicle membrane	18	0.971922	0.0258763	ENSMUSG00000054423, ENSMUSG00000026791, ENSMUSG00000017978, ENSMUSG00000063801, ENSMUSG00000049550, ENSMUSG00000025889, ENSMUSG00000021824, ENSMUSG00000000214, ENSMUSG00000025468, ENSMUSG00000016664, ENSMUSG00000051391, ENSMUSG00000044216, ENSMUSG00000020642, ENSMUSG00000063077, ENSMUSG00000042216, ENSMUSG00000020132, ENSMUSG00000032733, ENSMUSG00000022285	1677	120	19662	1.75868	1	0.228853	33.0997
GOTERM_BP_DIRECT	GO:0051480~regulation of cytosolic calcium ion concentration	8	0.431965	0.0263162	ENSMUSG00000030302, ENSMUSG00000005716, ENSMUSG00000003657, ENSMUSG00000036570, ENSMUSG00000030720, ENSMUSG00000027716, ENSMUSG00000028207, ENSMUSG00000020635	1545	35	18082	2.6751	1	0.743032	39.2208
GOTERM_BP_DIRECT	GO:0061025~membrane fusion	8	0.431965	0.0263162	ENSMUSG00000027438, ENSMUSG00000030806, ENSMUSG00000050732, ENSMUSG00000022789, ENSMUSG00000021814, ENSMUSG00000026825, ENSMUSG00000041488, ENSMUSG00000029428	1545	35	18082	2.6751	1	0.743032	39.2208
UP_KEYWORDS	Zinc transport	6	0.323974	0.0263346	ENSMUSG00000024270, ENSMUSG00000002105, ENSMUSG00000046822, ENSMUSG00000024327, ENSMUSG00000029151, ENSMUSG00000041654	1800	22	22680	3.43636	0.999987	0.140866	31.2719
GOTERM_BP_DIRECT	GO:0051489~regulation of filopodium assembly	5	0.269978	0.02645	ENSMUSG00000034675, ENSMUSG00000022099, ENSMUSG00000025920, ENSMUSG00000030720, ENSMUSG00000047261	1545	14	18082	4.17984	1	0.740591	39.3766
GOTERM_BP_DIRECT	GO:0031629~synaptic vesicle fusion to presynaptic active zone membrane	5	0.269978	0.02645	ENSMUSG00000030806, ENSMUSG00000026797, ENSMUSG00000041488, ENSMUSG00000009894, ENSMUSG00000029428	1545	14	18082	4.17984	1	0.740591	39.3766
GOTERM_BP_DIRECT	GO:0045055~regulated exocytosis	5	0.269978	0.02645	ENSMUSG00000021680, ENSMUSG00000056515, ENSMUSG00000079657, ENSMUSG00000051343, ENSMUSG00000021248	1545	14	18082	4.17984	1	0.740591	39.3766
GOTERM_BP_DIRECT	GO:0008610~lipid biosynthetic process	5	0.269978	0.02645	ENSMUSG00000020538, ENSMUSG00000031516, ENSMUSG00000021273, ENSMUSG00000031545, ENSMUSG00000020917	1545	14	18082	4.17984	1	0.740591	39.3766
UP_KEYWORDS	Calmodulin-binding	19	1.02592	0.0267068	ENSMUSG00000016179, ENSMUSG00000021708, ENSMUSG00000028179, ENSMUSG00000029471, ENSMUSG00000032507, ENSMUSG00000025537, ENSMUSG00000042632, ENSMUSG00000057455, ENSMUSG00000032503, ENSMUSG00000027488, ENSMUSG00000030302, ENSMUSG00000039145, ENSMUSG00000053310, ENSMUSG00000021820, ENSMUSG00000026463, ENSMUSG00000047261, ENSMUSG00000021816, ENSMUSG00000059173, ENSMUSG00000057897	1800	139	22680	1.7223	0.999989	0.140971	31.6401
UP_KEYWORDS	Ion channel	38	2.05184	0.0267511	ENSMUSG00000016346, ENSMUSG00000009647, ENSMUSG00000010803, ENSMUSG00000009687, ENSMUSG00000019194, ENSMUSG00000000560, ENSMUSG00000022843, ENSMUSG00000028096, ENSMUSG00000064329, ENSMUSG00000020436, ENSMUSG00000017412, ENSMUSG00000036570, ENSMUSG00000044216, ENSMUSG00000020882, ENSMUSG00000029088, ENSMUSG00000029211, ENSMUSG00000036026, ENSMUSG00000038026, ENSMUSG00000037624, ENSMUSG00000036578,…	1800	336	22680	1.425	0.999989	0.139469	31.6838
GOTERM_BP_DIRECT	GO:0030148~sphingolipid biosynthetic process	7	0.37797	0.0282448	ENSMUSG00000023021, ENSMUSG00000021036, ENSMUSG00000038633, ENSMUSG00000063275, ENSMUSG00000056124, ENSMUSG00000021263, ENSMUSG00000021468	1545	28	18082	2.92589	1	0.759506	41.4296
GOTERM_CC_DIRECT	GO:0005751~mitochondrial respiratory chain complex IV	5	0.269978	0.0335061	ENSMUSG00000030785, ENSMUSG00000029632, ENSMUSG00000035885, ENSMUSG00000025488, ENSMUSG00000017778	1677	15	19662	3.90817	1	0.283696	40.6982
GOTERM_BP_DIRECT	GO:0045116~protein neddylation	5	0.269978	0.0336893	ENSMUSG00000048787, ENSMUSG00000005575, ENSMUSG00000031878, ENSMUSG00000010376, ENSMUSG00000051234	1545	15	18082	3.90119	1	0.814456	47.2625
GOTERM_BP_DIRECT	GO:2000249~regulation of actin cytoskeleton reorganization	5	0.269978	0.0336893	ENSMUSG00000036504, ENSMUSG00000021477, ENSMUSG00000022469, ENSMUSG00000059456, ENSMUSG00000030220	1545	15	18082	3.90119	1	0.814456	47.2625
GOTERM_BP_DIRECT	GO:0006979~response to oxidative stress	19	1.02592	0.0340182	ENSMUSG00000054733, ENSMUSG00000059734, ENSMUSG00000022450, ENSMUSG00000028964, ENSMUSG00000004936, ENSMUSG00000030652, ENSMUSG00000031714, ENSMUSG00000027187, ENSMUSG00000024997, ENSMUSG00000022820, ENSMUSG00000018585, ENSMUSG00000022193, ENSMUSG00000021820, ENSMUSG00000021948, ENSMUSG00000028756, ENSMUSG00000020810, ENSMUSG00000024953, ENSMUSG00000025950, ENSMUSG00000028484	1545	133	18082	1.67194	1	0.81389	47.5966
UP_KEYWORDS	Alternative initiation	11	0.593952	0.0343931	ENSMUSG00000054733, ENSMUSG00000026526, ENSMUSG00000061751, ENSMUSG00000028416, ENSMUSG00000032101, ENSMUSG00000027636, ENSMUSG00000027618, ENSMUSG00000024953, ENSMUSG00000000552, ENSMUSG00000020184, ENSMUSG00000030067	1800	66	22680	2.1	1	0.174161	38.8472
UP_KEYWORDS	Exocytosis	11	0.593952	0.0343931	ENSMUSG00000053841, ENSMUSG00000039714, ENSMUSG00000054423, ENSMUSG00000034799, ENSMUSG00000041670, ENSMUSG00000033615, ENSMUSG00000017978, ENSMUSG00000040722, ENSMUSG00000003872, ENSMUSG00000062151, ENSMUSG00000035226	1800	66	22680	2.1	1	0.174161	38.8472
GOTERM_BP_DIRECT	GO:0046627~negative regulation of insulin receptor signaling pathway	8	0.431965	0.0347563	ENSMUSG00000033295, ENSMUSG00000024539, ENSMUSG00000021948, ENSMUSG00000020027, ENSMUSG00000020176, ENSMUSG00000032737, ENSMUSG00000002496, ENSMUSG00000053113	1545	37	18082	2.5305	1	0.817097	48.3392
GOTERM_BP_DIRECT	GO:0019226~transmission of nerve impulse	6	0.323974	0.0348366	ENSMUSG00000016346, ENSMUSG00000011751, ENSMUSG00000019146, ENSMUSG00000026442, ENSMUSG00000031990, ENSMUSG00000045092	1545	22	18082	3.19188	1	0.814267	48.4194
GOTERM_CC_DIRECT	GO:0005925~focal adhesion	45	2.42981	0.0351105	ENSMUSG00000004530, ENSMUSG00000022451, ENSMUSG00000008136, ENSMUSG00000047215, ENSMUSG00000060036, ENSMUSG00000032504, ENSMUSG00000003814, ENSMUSG00000001847, ENSMUSG00000041720, ENSMUSG00000061787, ENSMUSG00000017144, ENSMUSG00000031523, ENSMUSG00000091971, ENSMUSG00000016664, ENSMUSG00000051391, ENSMUSG00000030352, ENSMUSG00000003458, ENSMUSG00000058600, ENSMUSG00000059456, ENSMUSG00000022285,…	1677	391	19662	1.34937	1	0.292239	42.1897
GOTERM_CC_DIRECT	GO:0005742~mitochondrial outer membrane translocase complex	4	0.215983	0.0351307	ENSMUSG00000028998, ENSMUSG00000033475, ENSMUSG00000028756, ENSMUSG00000078713	1677	9	19662	5.21089	1	0.289427	42.2082
GOTERM_BP_DIRECT	GO:0097178~ruffle assembly	4	0.215983	0.0352867	ENSMUSG00000024397, ENSMUSG00000032737, ENSMUSG00000001847, ENSMUSG00000037316	1545	9	18082	5.20158	1	0.814819	48.8666
GOTERM_BP_DIRECT	GO:0045955~negative regulation of calcium ion-dependent exocytosis	4	0.215983	0.0352867	ENSMUSG00000026923, ENSMUSG00000035640, ENSMUSG00000021071, ENSMUSG00000024261	1545	9	18082	5.20158	1	0.814819	48.8666
GOTERM_BP_DIRECT	GO:0000103~sulfate assimilation	4	0.215983	0.0352867	ENSMUSG00000003271, ENSMUSG00000024583, ENSMUSG00000028367, ENSMUSG00000005354	1545	9	18082	5.20158	1	0.814819	48.8666
GOTERM_BP_DIRECT	GO:0006412~translation	46	2.4838	0.0355238	ENSMUSG00000029610, ENSMUSG00000026618, ENSMUSG00000018677, ENSMUSG00000049960, ENSMUSG00000030738, ENSMUSG00000047215, ENSMUSG00000019774, ENSMUSG00000060036, ENSMUSG00000016349, ENSMUSG00000015672, ENSMUSG00000045973, ENSMUSG00000054312, ENSMUSG00000061787, ENSMUSG00000022312, ENSMUSG00000052962, ENSMUSG00000028982, ENSMUSG00000020744, ENSMUSG00000021266, ENSMUSG00000027613, ENSMUSG00000049751,…	1545	401	18082	1.34255	1	0.813458	49.1008
UP_KEYWORDS	Neurogenesis	29	1.56587	0.0355534	ENSMUSG00000036955, ENSMUSG00000034701, ENSMUSG00000028949, ENSMUSG00000026121, ENSMUSG00000021743, ENSMUSG00000056596, ENSMUSG00000032368, ENSMUSG00000004558, ENSMUSG00000041609, ENSMUSG00000026259, ENSMUSG00000037601, ENSMUSG00000019647, ENSMUSG00000021820, ENSMUSG00000034675, ENSMUSG00000021451, ENSMUSG00000057778, ENSMUSG00000057897, ENSMUSG00000038255, ENSMUSG00000029600, ENSMUSG00000029245,…	1800	247	22680	1.47935	1	0.177487	39.8717
UP_KEYWORDS	Lipid transport	13	0.701944	0.0356445	ENSMUSG00000036078, ENSMUSG00000040430, ENSMUSG00000074968, ENSMUSG00000035189, ENSMUSG00000040564, ENSMUSG00000037685, ENSMUSG00000030741, ENSMUSG00000031672, ENSMUSG00000020435, ENSMUSG00000024797, ENSMUSG00000028559, ENSMUSG00000034088, ENSMUSG00000017754	1800	85	22680	1.92706	1	0.175865	39.9514
GOTERM_BP_DIRECT	GO:0008152~metabolic process	52	2.80778	0.0362361	ENSMUSG00000021036, ENSMUSG00000002550, ENSMUSG00000023832, ENSMUSG00000031781, ENSMUSG00000020475, ENSMUSG00000031545, ENSMUSG00000026670, ENSMUSG00000029545, ENSMUSG00000018574, ENSMUSG00000060376, ENSMUSG00000054008, ENSMUSG00000006800, ENSMUSG00000037373, ENSMUSG00000062480, ENSMUSG00000032047, ENSMUSG00000074264, ENSMUSG00000024556, ENSMUSG00000053398, ENSMUSG00000025745, ENSMUSG00000025153,…	1545	463	18082	1.31444	1	0.816321	49.798
GOTERM_CC_DIRECT	GO:0005764~lysosome	39	2.10583	0.0366584	ENSMUSG00000027534, ENSMUSG00000050732, ENSMUSG00000007891, ENSMUSG00000029434, ENSMUSG00000002320, ENSMUSG00000057506, ENSMUSG00000029151, ENSMUSG00000022848, ENSMUSG00000020100, ENSMUSG00000025759, ENSMUSG00000025534, ENSMUSG00000021477, ENSMUSG00000025512, ENSMUSG00000022620, ENSMUSG00000090247, ENSMUSG00000002496, ENSMUSG00000035629, ENSMUSG00000021124, ENSMUSG00000035805, ENSMUSG00000027291,…	1677	331	19662	1.38144	1	0.297124	43.5954
GOTERM_CC_DIRECT	GO:0005623~cell	29	1.56587	0.0369982	ENSMUSG00000027534, ENSMUSG00000024583, ENSMUSG00000020848, ENSMUSG00000048486, ENSMUSG00000005354, ENSMUSG00000096054, ENSMUSG00000063801, ENSMUSG00000041609, ENSMUSG00000028096, ENSMUSG00000021824, ENSMUSG00000021647, ENSMUSG00000003657, ENSMUSG00000039781, ENSMUSG00000037622, ENSMUSG00000050043, ENSMUSG00000038456, ENSMUSG00000029600, ENSMUSG00000050708, ENSMUSG00000029392, ENSMUSG00000040697,…	1677	231	19662	1.47191	1	0.296522	43.8996
UP_KEYWORDS	Magnesium	54	2.91577	0.0370503	ENSMUSG00000024969, ENSMUSG00000056124, ENSMUSG00000060579, ENSMUSG00000004267, ENSMUSG00000015961, ENSMUSG00000022994, ENSMUSG00000025035, ENSMUSG00000049734, ENSMUSG00000046442, ENSMUSG00000002844, ENSMUSG00000030316, ENSMUSG00000053693, ENSMUSG00000049225, ENSMUSG00000034187, ENSMUSG00000028945, ENSMUSG00000032570, ENSMUSG00000020736, ENSMUSG00000027546, ENSMUSG00000021279, ENSMUSG00000027108,…	1800	521	22680	1.30595	1	0.180189	41.1699
GOTERM_BP_DIRECT	GO:1903955~positive regulation of protein targeting to mitochondrion	13	0.701944	0.0383305	ENSMUSG00000030854, ENSMUSG00000038965, ENSMUSG00000026986, ENSMUSG00000046707, ENSMUSG00000037062, ENSMUSG00000020061, ENSMUSG00000028998, ENSMUSG00000029403, ENSMUSG00000026750, ENSMUSG00000064145, ENSMUSG00000041986, ENSMUSG00000032735, ENSMUSG00000028756	1545	80	18082	1.90183	1	0.830507	51.7963
GOTERM_BP_DIRECT	GO:0034765~regulation of ion transmembrane transport	19	1.02592	0.0386577	ENSMUSG00000016346, ENSMUSG00000047976, ENSMUSG00000019146, ENSMUSG00000038077, ENSMUSG00000019194, ENSMUSG00000021991, ENSMUSG00000022843, ENSMUSG00000034659, ENSMUSG00000028096, ENSMUSG00000064329, ENSMUSG00000017412, ENSMUSG00000027895, ENSMUSG00000020704, ENSMUSG00000020882, ENSMUSG00000044216, ENSMUSG00000029088, ENSMUSG00000028931, ENSMUSG00000053519, ENSMUSG00000038026	1545	135	18082	1.64717	1	0.829862	52.1016
GOTERM_CC_DIRECT	GO:0044305~calyx of Held	3	0.161987	0.0387831	ENSMUSG00000034799, ENSMUSG00000062151, ENSMUSG00000037624	1677	4	19662	8.79338	1	0.30562	45.4729
GOTERM_CC_DIRECT	GO:0008274~gamma-tubulin ring complex	3	0.161987	0.0387831	ENSMUSG00000022671, ENSMUSG00000033186, ENSMUSG00000051786	1677	4	19662	8.79338	1	0.30562	45.4729
GOTERM_BP_DIRECT	GO:1903278~positive regulation of sodium ion export from cell	3	0.161987	0.0389086	ENSMUSG00000026576, ENSMUSG00000036570, ENSMUSG00000041329	1545	4	18082	8.77767	1	0.828626	52.3344
GOTERM_BP_DIRECT	GO:0038108~negative regulation of appetite by leptin-mediated signaling pathway	3	0.161987	0.0389086	ENSMUSG00000031755, ENSMUSG00000025235, ENSMUSG00000027274	1545	4	18082	8.77767	1	0.828626	52.3344
GOTERM_BP_DIRECT	GO:0043097~pyrimidine nucleoside salvage	3	0.161987	0.0389086	ENSMUSG00000002550, ENSMUSG00000089917, ENSMUSG00000026558	1545	4	18082	8.77767	1	0.828626	52.3344
UP_KEYWORDS	Apoptosis	51	2.75378	0.038961	ENSMUSG00000029610, ENSMUSG00000028416, ENSMUSG00000031781, ENSMUSG00000029433, ENSMUSG00000060579, ENSMUSG00000036199, ENSMUSG00000032504, ENSMUSG00000033256, ENSMUSG00000031878, ENSMUSG00000027016, ENSMUSG00000061436, ENSMUSG00000017670, ENSMUSG00000004748, ENSMUSG00000014771, ENSMUSG00000024012, ENSMUSG00000021948, ENSMUSG00000002265, ENSMUSG00000024826, ENSMUSG00000019979, ENSMUSG00000026430,…	1800	489	22680	1.31411	1	0.186615	42.7891
GOTERM_CC_DIRECT	GO:0043231~intracellular membrane-bounded organelle	79	4.26566	0.0392772	ENSMUSG00000002658, ENSMUSG00000020841, ENSMUSG00000017978, ENSMUSG00000020375, ENSMUSG00000024261, ENSMUSG00000027618, ENSMUSG00000001467, ENSMUSG00000019173, ENSMUSG00000016194, ENSMUSG00000002413, ENSMUSG00000020538, ENSMUSG00000003271, ENSMUSG00000025759, ENSMUSG00000022789, ENSMUSG00000024826, ENSMUSG00000039781, ENSMUSG00000002496, ENSMUSG00000020635, ENSMUSG00000021124, ENSMUSG00000026688,…	1677	751	19662	1.23334	1	0.305963	45.9011
GOTERM_BP_DIRECT	GO:0007528~neuromuscular junction development	8	0.431965	0.0395789	ENSMUSG00000017412, ENSMUSG00000034799, ENSMUSG00000019146, ENSMUSG00000061751, ENSMUSG00000020882, ENSMUSG00000030849, ENSMUSG00000029048, ENSMUSG00000027488	1545	38	18082	2.46391	1	0.83069	52.9514
UP_KEYWORDS	Lyase	19	1.02592	0.0408177	ENSMUSG00000026526, ENSMUSG00000033910, ENSMUSG00000063275, ENSMUSG00000023452, ENSMUSG00000028684, ENSMUSG00000028179, ENSMUSG00000025745, ENSMUSG00000031536, ENSMUSG00000025153, ENSMUSG00000004267, ENSMUSG00000045316, ENSMUSG00000021536, ENSMUSG00000006517, ENSMUSG00000032067, ENSMUSG00000028005, ENSMUSG00000001666, ENSMUSG00000022994, ENSMUSG00000024039, ENSMUSG00000030695	1800	146	22680	1.63973	1	0.19262	44.3228
UP_KEYWORDS	Voltage-gated channel	18	0.971922	0.0410564	ENSMUSG00000016346, ENSMUSG00000047976, ENSMUSG00000019146, ENSMUSG00000038077, ENSMUSG00000019194, ENSMUSG00000021991, ENSMUSG00000034659, ENSMUSG00000022843, ENSMUSG00000028096, ENSMUSG00000064329, ENSMUSG00000017412, ENSMUSG00000027895, ENSMUSG00000020882, ENSMUSG00000044216, ENSMUSG00000029088, ENSMUSG00000028931, ENSMUSG00000053519, ENSMUSG00000038026	1800	136	22680	1.66765	1	0.191558	44.5172
GOTERM_CC_DIRECT	GO:0000151~ubiquitin ligase complex	14	0.75594	0.0412983	ENSMUSG00000048787, ENSMUSG00000005371, ENSMUSG00000040351, ENSMUSG00000021774, ENSMUSG00000059890, ENSMUSG00000039615, ENSMUSG00000091971, ENSMUSG00000028557, ENSMUSG00000024325, ENSMUSG00000052752, ENSMUSG00000078923, ENSMUSG00000064145, ENSMUSG00000020642, ENSMUSG00000020801	1677	90	19662	1.82381	1	0.316178	47.62
GOTERM_BP_DIRECT	GO:0001934~positive regulation of protein phosphorylation	24	1.2959	0.0414101	ENSMUSG00000052593, ENSMUSG00000019579, ENSMUSG00000030854, ENSMUSG00000027347, ENSMUSG00000048583, ENSMUSG00000024397, ENSMUSG00000061374, ENSMUSG00000025147, ENSMUSG00000030720, ENSMUSG00000001847, ENSMUSG00000042632, ENSMUSG00000031750, ENSMUSG00000061436, ENSMUSG00000000184, ENSMUSG00000057531, ENSMUSG00000021451, ENSMUSG00000028756, ENSMUSG00000022469, ENSMUSG00000025499, ENSMUSG00000042249,…	1545	184	18082	1.52655	1	0.841275	54.5983
GOTERM_BP_DIRECT	GO:0048814~regulation of dendrite morphogenesis	6	0.323974	0.0414851	ENSMUSG00000027950, ENSMUSG00000026959, ENSMUSG00000021451, ENSMUSG00000096054, ENSMUSG00000036306, ENSMUSG00000033569	1545	23	18082	3.0531	1	0.838778	54.6645
GOTERM_BP_DIRECT	GO:2000649~regulation of sodium ion transmembrane transporter activity	5	0.269978	0.0419671	ENSMUSG00000036570, ENSMUSG00000009687, ENSMUSG00000022523, ENSMUSG00000019194, ENSMUSG00000057092	1545	16	18082	3.65736	1	0.839232	55.0883
GOTERM_BP_DIRECT	GO:0030970~retrograde protein transport, ER to cytosol	5	0.269978	0.0419671	ENSMUSG00000039703, ENSMUSG00000040462, ENSMUSG00000022365, ENSMUSG00000018442, ENSMUSG00000019295	1545	16	18082	3.65736	1	0.839232	55.0883
UP_KEYWORDS	Translocation	12	0.647948	0.0433553	ENSMUSG00000015023, ENSMUSG00000027679, ENSMUSG00000013701, ENSMUSG00000052584, ENSMUSG00000020219, ENSMUSG00000031529, ENSMUSG00000078974, ENSMUSG00000030082, ENSMUSG00000034203, ENSMUSG00000021079, ENSMUSG00000022013, ENSMUSG00000024357	1800	78	22680	1.93846	1	0.1992	46.3573
UP_KEYWORDS	Tricarboxylic acid cycle	6	0.323974	0.0436697	ENSMUSG00000021748, ENSMUSG00000026526, ENSMUSG00000000171, ENSMUSG00000020321, ENSMUSG00000025950, ENSMUSG00000027406	1800	25	22680	3.024	1	0.19841	46.6045
GOTERM_BP_DIRECT	GO:0009060~aerobic respiration	8	0.431965	0.044818	ENSMUSG00000030785, ENSMUSG00000021520, ENSMUSG00000037916, ENSMUSG00000045438, ENSMUSG00000059534, ENSMUSG00000025486, ENSMUSG00000090247, ENSMUSG00000027187	1545	39	18082	2.40073	1	0.855591	57.5191
GOTERM_CC_DIRECT	GO:0005856~cytoskeleton	112	6.04752	0.0462751	ENSMUSG00000022451, ENSMUSG00000024969, ENSMUSG00000021071, ENSMUSG00000036533, ENSMUSG00000006717, ENSMUSG00000032504, ENSMUSG00000041263, ENSMUSG00000028441, ENSMUSG00000058672, ENSMUSG00000041775, ENSMUSG00000026430, ENSMUSG00000031971, ENSMUSG00000053693, ENSMUSG00000030064, ENSMUSG00000032589, ENSMUSG00000035439, ENSMUSG00000029600, ENSMUSG00000034616, ENSMUSG00000031516, ENSMUSG00000051786,…	1677	1113	19662	1.17982	1	0.344372	51.6375
GOTERM_BP_DIRECT	GO:0006470~protein dephosphorylation	19	1.02592	0.0464561	ENSMUSG00000033295, ENSMUSG00000030854, ENSMUSG00000044573, ENSMUSG00000034616, ENSMUSG00000093803, ENSMUSG00000018648, ENSMUSG00000024668, ENSMUSG00000028909, ENSMUSG00000030002, ENSMUSG00000036504, ENSMUSG00000028771, ENSMUSG00000024539, ENSMUSG00000046442, ENSMUSG00000021816, ENSMUSG00000042662, ENSMUSG00000038042, ENSMUSG00000062127, ENSMUSG00000049225, ENSMUSG00000028399	1545	138	18082	1.61136	1	0.862958	58.8589
GOTERM_CC_DIRECT	GO:0005890~sodium:potassium-exchanging ATPase complex	4	0.215983	0.0470733	ENSMUSG00000026576, ENSMUSG00000040907, ENSMUSG00000036570, ENSMUSG00000041329	1677	10	19662	4.6898	1	0.346131	52.2543
GOTERM_CC_DIRECT	GO:0097470~ribbon synapse	4	0.215983	0.0470733	ENSMUSG00000022469, ENSMUSG00000051790, ENSMUSG00000041488, ENSMUSG00000032589	1677	10	19662	4.6898	1	0.346131	52.2543
GOTERM_BP_DIRECT	GO:0071404~cellular response to low-density lipoprotein particle stimulus	4	0.215983	0.0472774	ENSMUSG00000051980, ENSMUSG00000024413, ENSMUSG00000030342, ENSMUSG00000058715	1545	10	18082	4.68142	1	0.865129	59.5155
GOTERM_BP_DIRECT	GO:0044321~response to leptin	4	0.215983	0.0472774	ENSMUSG00000031755, ENSMUSG00000025235, ENSMUSG00000004040, ENSMUSG00000027274	1545	10	18082	4.68142	1	0.865129	59.5155
GOTERM_BP_DIRECT	GO:0033210~leptin-mediated signaling pathway	4	0.215983	0.0472774	ENSMUSG00000031755, ENSMUSG00000025235, ENSMUSG00000004040, ENSMUSG00000027274	1545	10	18082	4.68142	1	0.865129	59.5155
GOTERM_BP_DIRECT	GO:0033138~positive regulation of peptidyl-serine phosphorylation	12	0.647948	0.0487221	ENSMUSG00000025889, ENSMUSG00000028556, ENSMUSG00000028964, ENSMUSG00000027944, ENSMUSG00000026463, ENSMUSG00000028367, ENSMUSG00000028756, ENSMUSG00000022469, ENSMUSG00000061175, ENSMUSG00000031980, ENSMUSG00000002413, ENSMUSG00000037316	1545	74	18082	1.89787	1	0.870743	60.6465
GOTERM_BP_DIRECT	GO:0048714~positive regulation of oligodendrocyte differentiation	6	0.323974	0.0488473	ENSMUSG00000044519, ENSMUSG00000027434, ENSMUSG00000039952, ENSMUSG00000022425, ENSMUSG00000065485, ENSMUSG00000028945	1545	24	18082	2.92589	1	0.868852	60.7431
GOTERM_BP_DIRECT	GO:0017158~regulation of calcium ion-dependent exocytosis	6	0.323974	0.0488473	ENSMUSG00000035864, ENSMUSG00000024261, ENSMUSG00000020848, ENSMUSG00000058420, ENSMUSG00000029608, ENSMUSG00000004961	1545	24	18082	2.92589	1	0.868852	60.7431
GOTERM_CC_DIRECT	GO:0044291~cell-cell contact zone	5	0.269978	0.0510186	ENSMUSG00000002489, ENSMUSG00000022568, ENSMUSG00000055421, ENSMUSG00000031990, ENSMUSG00000022656	1677	17	19662	3.44838	1	0.366397	55.1969
GOTERM_BP_DIRECT	GO:0008299~isoprenoid biosynthetic process	5	0.269978	0.0512866	ENSMUSG00000059743, ENSMUSG00000021273, ENSMUSG00000029319, ENSMUSG00000021670, ENSMUSG00000006517	1545	17	18082	3.44222	1	0.879373	62.5808
GOTERM_BP_DIRECT	GO:0072657~protein localization to membrane	5	0.269978	0.0512866	ENSMUSG00000002489, ENSMUSG00000030806, ENSMUSG00000037852, ENSMUSG00000030720, ENSMUSG00000037712	1545	17	18082	3.44222	1	0.879373	62.5808
GOTERM_BP_DIRECT	GO:0045956~positive regulation of calcium ion-dependent exocytosis	5	0.269978	0.0512866	ENSMUSG00000054423, ENSMUSG00000035864, ENSMUSG00000040722, ENSMUSG00000020848, ENSMUSG00000026797	1545	17	18082	3.44222	1	0.879373	62.5808
UP_KEYWORDS	Flavoprotein	17	0.917927	0.0522411	ENSMUSG00000037916, ENSMUSG00000032314, ENSMUSG00000003526, ENSMUSG00000026003, ENSMUSG00000026260, ENSMUSG00000025155, ENSMUSG00000062729, ENSMUSG00000018659, ENSMUSG00000040181, ENSMUSG00000000399, ENSMUSG00000029998, ENSMUSG00000036327, ENSMUSG00000029545, ENSMUSG00000018574, ENSMUSG00000039048, ENSMUSG00000006471, ENSMUSG00000033684	1800	130	22680	1.64769	1	0.230997	52.9498
GOTERM_BP_DIRECT	GO:0007612~learning	11	0.593952	0.0524326	ENSMUSG00000052684, ENSMUSG00000042453, ENSMUSG00000000214, ENSMUSG00000027950, ENSMUSG00000037685, ENSMUSG00000026959, ENSMUSG00000063239, ENSMUSG00000028546, ENSMUSG00000039059, ENSMUSG00000027792, ENSMUSG00000022208	1545	66	18082	1.95059	1	0.882698	63.4158
GOTERM_BP_DIRECT	GO:0098609~cell-cell adhesion	24	1.2959	0.0533445	ENSMUSG00000030533, ENSMUSG00000074513, ENSMUSG00000022568, ENSMUSG00000022451, ENSMUSG00000024969, ENSMUSG00000032637, ENSMUSG00000024862, ENSMUSG00000003200, ENSMUSG00000026860, ENSMUSG00000041720, ENSMUSG00000091971, ENSMUSG00000017670, ENSMUSG00000016664, ENSMUSG00000027108, ENSMUSG00000021196, ENSMUSG00000028433, ENSMUSG00000034088, ENSMUSG00000025950, ENSMUSG00000030695, ENSMUSG00000040659,…	1545	189	18082	1.48617	1	0.88476	64.0675
UP_KEYWORDS	Phosphopantetheine	3	0.161987	0.0534993	ENSMUSG00000020256, ENSMUSG00000025153, ENSMUSG00000030869	1800	5	22680	7.56	1	0.233615	53.82
GOTERM_BP_DIRECT	GO:0016567~protein ubiquitination	41	2.21382	0.0556166	ENSMUSG00000036352, ENSMUSG00000005371, ENSMUSG00000038965, ENSMUSG00000040462, ENSMUSG00000055707, ENSMUSG00000032507, ENSMUSG00000039483, ENSMUSG00000039615, ENSMUSG00000045210, ENSMUSG00000029312, ENSMUSG00000019295, ENSMUSG00000041528, ENSMUSG00000055839, ENSMUSG00000070923, ENSMUSG00000025170, ENSMUSG00000020027, ENSMUSG00000052981, ENSMUSG00000037622, ENSMUSG00000053113, ENSMUSG00000001366,…	1545	362	18082	1.32554	1	0.892941	65.6441
UP_KEYWORDS	NAD	22	1.1879	0.0557567	ENSMUSG00000059734, ENSMUSG00000024099, ENSMUSG00000025968, ENSMUSG00000037916, ENSMUSG00000032018, ENSMUSG00000031529, ENSMUSG00000025138, ENSMUSG00000020321, ENSMUSG00000026675, ENSMUSG00000024556, ENSMUSG00000030905, ENSMUSG00000053398, ENSMUSG00000025745, ENSMUSG00000025153, ENSMUSG00000037373, ENSMUSG00000028070, ENSMUSG00000027893, ENSMUSG00000025486, ENSMUSG00000003500, ENSMUSG00000031604,…	1800	183	22680	1.51475	1	0.240025	55.3438
GOTERM_CC_DIRECT	GO:0019898~extrinsic component of membrane	13	0.701944	0.0563012	ENSMUSG00000034570, ENSMUSG00000025089, ENSMUSG00000020876, ENSMUSG00000052397, ENSMUSG00000025173, ENSMUSG00000016664, ENSMUSG00000029560, ENSMUSG00000056185, ENSMUSG00000026088, ENSMUSG00000029608, ENSMUSG00000032589, ENSMUSG00000020220, ENSMUSG00000032733	1677	85	19662	1.79316	1	0.393159	58.872
GOTERM_CC_DIRECT	GO:0043195~terminal bouton	16	0.863931	0.0566385	ENSMUSG00000034891, ENSMUSG00000034799, ENSMUSG00000063239, ENSMUSG00000032532, ENSMUSG00000062151, ENSMUSG00000026797, ENSMUSG00000025889, ENSMUSG00000000214, ENSMUSG00000005716, ENSMUSG00000033615, ENSMUSG00000003657, ENSMUSG00000026959, ENSMUSG00000035864, ENSMUSG00000033419, ENSMUSG00000053025, ENSMUSG00000068923	1677	113	19662	1.66011	1	0.391748	59.0968
GOTERM_BP_DIRECT	GO:0003382~epithelial cell morphogenesis	6	0.323974	0.0569291	ENSMUSG00000022568, ENSMUSG00000048251, ENSMUSG00000030583, ENSMUSG00000029392, ENSMUSG00000048826, ENSMUSG00000001847	1545	25	18082	2.80885	1	0.896428	66.5247
GOTERM_BP_DIRECT	GO:0015991~ATP hydrolysis coupled proton transport	7	0.37797	0.057887	ENSMUSG00000062683, ENSMUSG00000040907, ENSMUSG00000019210, ENSMUSG00000078958, ENSMUSG00000001750, ENSMUSG00000018770, ENSMUSG00000006057	1545	33	18082	2.48257	1	0.898291	67.1538
GOTERM_BP_DIRECT	GO:0008285~negative regulation of cell proliferation	43	2.32181	0.0580353	ENSMUSG00000052684, ENSMUSG00000033295, ENSMUSG00000029610, ENSMUSG00000029050, ENSMUSG00000093803, ENSMUSG00000029276, ENSMUSG00000021743, ENSMUSG00000028179, ENSMUSG00000022508, ENSMUSG00000020415, ENSMUSG00000028207, ENSMUSG00000031660, ENSMUSG00000031523, ENSMUSG00000028909, ENSMUSG00000091971, ENSMUSG00000020262, ENSMUSG00000022105, ENSMUSG00000040055, ENSMUSG00000026430, ENSMUSG00000032737,…	1545	384	18082	1.31055	1	0.896774	67.2502
GOTERM_CC_DIRECT	GO:0015629~actin cytoskeleton	25	1.34989	0.0581092	ENSMUSG00000004530, ENSMUSG00000022451, ENSMUSG00000036533, ENSMUSG00000008136, ENSMUSG00000020846, ENSMUSG00000025085, ENSMUSG00000027944, ENSMUSG00000034675, ENSMUSG00000000416, ENSMUSG00000036026, ENSMUSG00000062127, ENSMUSG00000038456, ENSMUSG00000054733, ENSMUSG00000052593, ENSMUSG00000021493, ENSMUSG00000078484, ENSMUSG00000052397, ENSMUSG00000030707, ENSMUSG00000075284, ENSMUSG00000025889,…	1677	201	19662	1.45827	1	0.396518	60.0637
GOTERM_CC_DIRECT	GO:0001726~ruffle	14	0.75594	0.0594944	ENSMUSG00000026923, ENSMUSG00000034570, ENSMUSG00000021493, ENSMUSG00000026925, ENSMUSG00000024397, ENSMUSG00000037126, ENSMUSG00000052397, ENSMUSG00000020173, ENSMUSG00000075284, ENSMUSG00000049550, ENSMUSG00000023905, ENSMUSG00000031078, ENSMUSG00000015143, ENSMUSG00000030064	1677	95	19662	1.72782	1	0.400709	60.9547
GOTERM_CC_DIRECT	GO:0034705~potassium channel complex	4	0.215983	0.0607307	ENSMUSG00000047976, ENSMUSG00000038077, ENSMUSG00000028931, ENSMUSG00000053519	1677	11	19662	4.26346	1	0.404015	61.7343
GOTERM_BP_DIRECT	GO:0048708~astrocyte differentiation	4	0.215983	0.0609878	ENSMUSG00000026923, ENSMUSG00000001911, ENSMUSG00000027434, ENSMUSG00000004040	1545	11	18082	4.25584	1	0.906383	69.1146
GOTERM_BP_DIRECT	GO:0021707~cerebellar granule cell differentiation	4	0.215983	0.0609878	ENSMUSG00000001911, ENSMUSG00000030302, ENSMUSG00000030093, ENSMUSG00000031654	1545	11	18082	4.25584	1	0.906383	69.1146
GOTERM_BP_DIRECT	GO:0003014~renal system process	4	0.215983	0.0609878	ENSMUSG00000057672, ENSMUSG00000039737, ENSMUSG00000021190, ENSMUSG00000031980	1545	11	18082	4.25584	1	0.906383	69.1146
GOTERM_CC_DIRECT	GO:0005663~DNA replication factor C complex	3	0.161987	0.0610245	ENSMUSG00000033970, ENSMUSG00000022881, ENSMUSG00000029363	1677	5	19662	7.0347	1	0.402357	61.9174
GOTERM_CC_DIRECT	GO:0033177~proton-transporting two-sector ATPase complex, proton-transporting domain	3	0.161987	0.0610245	ENSMUSG00000062683, ENSMUSG00000018770, ENSMUSG00000006057	1677	5	19662	7.0347	1	0.402357	61.9174
GOTERM_BP_DIRECT	GO:0006532~aspartate biosynthetic process	3	0.161987	0.0612161	ENSMUSG00000030268, ENSMUSG00000031672, ENSMUSG00000025190	1545	5	18082	7.02214	1	0.905245	69.2546
GOTERM_BP_DIRECT	GO:1903214~regulation of protein targeting to mitochondrion	3	0.161987	0.0612161	ENSMUSG00000020538, ENSMUSG00000054428, ENSMUSG00000028756	1545	5	18082	7.02214	1	0.905245	69.2546
GOTERM_BP_DIRECT	GO:0006662~glycerol ether metabolic process	3	0.161987	0.0612161	ENSMUSG00000024583, ENSMUSG00000028367, ENSMUSG00000005354	1545	5	18082	7.02214	1	0.905245	69.2546
GOTERM_BP_DIRECT	GO:0044206~UMP salvage	3	0.161987	0.0612161	ENSMUSG00000002550, ENSMUSG00000089917, ENSMUSG00000026558	1545	5	18082	7.02214	1	0.905245	69.2546
GOTERM_BP_DIRECT	GO:0045039~protein import into mitochondrial inner membrane	3	0.161987	0.0612161	ENSMUSG00000048967, ENSMUSG00000020219, ENSMUSG00000036199, ENSMUSG00000021079	1545	5	18082	7.02214	1	0.905245	69.2546
GOTERM_BP_DIRECT	GO:0006103~2-oxoglutarate metabolic process	5	0.269978	0.0616386	ENSMUSG00000025950, ENSMUSG00000031672, ENSMUSG00000025190, ENSMUSG00000061474, ENSMUSG00000027406	1545	18	18082	3.25099	1	0.904845	69.5118
GOTERM_BP_DIRECT	GO:1900273~positive regulation of long-term synaptic potentiation	5	0.269978	0.0616386	ENSMUSG00000042453, ENSMUSG00000030854, ENSMUSG00000061751, ENSMUSG00000053310, ENSMUSG00000039536	1545	18	18082	3.25099	1	0.904845	69.5118
GOTERM_BP_DIRECT	GO:0051000~positive regulation of nitric-oxide synthase activity	5	0.269978	0.0616386	ENSMUSG00000037936, ENSMUSG00000036438, ENSMUSG00000019370, ENSMUSG00000031921, ENSMUSG00000059456	1545	18	18082	3.25099	1	0.904845	69.5118
UP_KEYWORDS	Palmitate	33	1.78186	0.0621111	ENSMUSG00000020841, ENSMUSG00000028964, ENSMUSG00000002459, ENSMUSG00000032562, ENSMUSG00000045777, ENSMUSG00000001844, ENSMUSG00000029544, ENSMUSG00000020436, ENSMUSG00000038530, ENSMUSG00000002458, ENSMUSG00000036570, ENSMUSG00000025170, ENSMUSG00000027581, ENSMUSG00000020658, ENSMUSG00000052298, ENSMUSG00000060591, ENSMUSG00000015335, ENSMUSG00000026688, ENSMUSG00000047976, ENSMUSG00000038077,…	1800	304	22680	1.36776	1	0.261642	59.3861
GOTERM_BP_DIRECT	GO:0006887~exocytosis	15	0.809935	0.0627502	ENSMUSG00000053841, ENSMUSG00000039714, ENSMUSG00000054423, ENSMUSG00000034799, ENSMUSG00000041670, ENSMUSG00000017978, ENSMUSG00000024261, ENSMUSG00000040722, ENSMUSG00000003872, ENSMUSG00000062151, ENSMUSG00000058420, ENSMUSG00000026797, ENSMUSG00000033615, ENSMUSG00000035226, ENSMUSG00000041488	1545	105	18082	1.67194	1	0.906991	70.1792
GOTERM_BP_DIRECT	GO:0001662~behavioral fear response	8	0.431965	0.0631109	ENSMUSG00000038255, ENSMUSG00000045573, ENSMUSG00000021684, ENSMUSG00000055078, ENSMUSG00000061751, ENSMUSG00000020883, ENSMUSG00000032532, ENSMUSG00000026385	1545	42	18082	2.22925	1	0.906369	70.3927
GOTERM_BP_DIRECT	GO:0048167~regulation of synaptic plasticity	8	0.431965	0.0631109	ENSMUSG00000020091, ENSMUSG00000030302, ENSMUSG00000039542, ENSMUSG00000026959, ENSMUSG00000051391, ENSMUSG00000025551, ENSMUSG00000036306, ENSMUSG00000022208	1545	42	18082	2.22925	1	0.906369	70.3927
UP_KEYWORDS	Metal-binding	293	15.8207	0.0642165	ENSMUSG00000037916, ENSMUSG00000061666, ENSMUSG00000093803, ENSMUSG00000031781, ENSMUSG00000024261, ENSMUSG00000022508, ENSMUSG00000019370, ENSMUSG00000051234, ENSMUSG00000015961, ENSMUSG00000020262, ENSMUSG00000036438, ENSMUSG00000010086, ENSMUSG00000025486, ENSMUSG00000048385, ENSMUSG00000053693, ENSMUSG00000049225, ENSMUSG00000034187, ENSMUSG00000059734, ENSMUSG00000022635, ENSMUSG00000022634,…	1800	3395	22680	1.08742	1	0.266897	60.6486
GOTERM_BP_DIRECT	GO:0001503~ossification	14	0.75594	0.0643532	ENSMUSG00000046985, ENSMUSG00000051980, ENSMUSG00000021493, ENSMUSG00000048583, ENSMUSG00000040297, ENSMUSG00000030218, ENSMUSG00000018593, ENSMUSG00000027198, ENSMUSG00000027770, ENSMUSG00000014599, ENSMUSG00000022098, ENSMUSG00000027339, ENSMUSG00000026241, ENSMUSG00000029755	1545	96	18082	1.70677	1	0.908897	71.1172
GOTERM_CC_DIRECT	GO:0030667~secretory granule membrane	6	0.323974	0.0653446	ENSMUSG00000050732, ENSMUSG00000037852, ENSMUSG00000079657, ENSMUSG00000024261, ENSMUSG00000021248, ENSMUSG00000062995	1677	26	19662	2.70566	1	0.421215	64.517
GOTERM_CC_DIRECT	GO:0031519~PcG protein complex	6	0.323974	0.0653446	ENSMUSG00000040669, ENSMUSG00000024325, ENSMUSG00000089715, ENSMUSG00000072872, ENSMUSG00000046707, ENSMUSG00000029475	1677	26	19662	2.70566	1	0.421215	64.517
GOTERM_BP_DIRECT	GO:0006829~zinc II ion transport	6	0.323974	0.0657302	ENSMUSG00000024270, ENSMUSG00000002105, ENSMUSG00000046822, ENSMUSG00000024327, ENSMUSG00000029151, ENSMUSG00000041654	1545	26	18082	2.70082	1	0.911777	71.9006
UP_KEYWORDS	Hydrolase	148	7.99136	0.0659223	ENSMUSG00000034570, ENSMUSG00000061666, ENSMUSG00000006906, ENSMUSG00000020475, ENSMUSG00000006717, ENSMUSG00000039033, ENSMUSG00000020076, ENSMUSG00000001847, ENSMUSG00000020079, ENSMUSG00000028909, ENSMUSG00000024824, ENSMUSG00000029715, ENSMUSG00000020262, ENSMUSG00000032040, ENSMUSG00000022789, ENSMUSG00000006800, ENSMUSG00000002844, ENSMUSG00000025486, ENSMUSG00000038042, ENSMUSG00000049225,…	1800	1646	22680	1.13293	1	0.270575	61.6447
GOTERM_CC_DIRECT	GO:0005913~cell-cell adherens junction	36	1.94384	0.0660109	ENSMUSG00000074513, ENSMUSG00000064115, ENSMUSG00000022568, ENSMUSG00000022451, ENSMUSG00000024969, ENSMUSG00000028964, ENSMUSG00000024862, ENSMUSG00000003200, ENSMUSG00000041720, ENSMUSG00000026860, ENSMUSG00000034101, ENSMUSG00000091971, ENSMUSG00000016664, ENSMUSG00000022661, ENSMUSG00000034675, ENSMUSG00000034088, ENSMUSG00000040659, ENSMUSG00000036686, ENSMUSG00000001036, ENSMUSG00000022285,…	1677	316	19662	1.3357	1	0.421325	64.9029
GOTERM_BP_DIRECT	GO:0006511~ubiquitin-dependent protein catabolic process	20	1.07991	0.0661371	ENSMUSG00000039703, ENSMUSG00000036840, ENSMUSG00000042506, ENSMUSG00000047879, ENSMUSG00000029634, ENSMUSG00000032507, ENSMUSG00000039615, ENSMUSG00000059890, ENSMUSG00000027566, ENSMUSG00000005625, ENSMUSG00000031751, ENSMUSG00000038429, ENSMUSG00000020390, ENSMUSG00000028557, ENSMUSG00000032867, ENSMUSG00000079658, ENSMUSG00000030751, ENSMUSG00000064145, ENSMUSG00000038324, ENSMUSG00000015837	1545	154	18082	1.51994	1	0.911321	72.1282
UP_KEYWORDS	Fatty acid metabolism	16	0.863931	0.0663549	ENSMUSG00000032281, ENSMUSG00000038633, ENSMUSG00000026003, ENSMUSG00000063275, ENSMUSG00000007783, ENSMUSG00000025745, ENSMUSG00000025153, ENSMUSG00000026853, ENSMUSG00000030869, ENSMUSG00000015090, ENSMUSG00000029545, ENSMUSG00000024665, ENSMUSG00000018574, ENSMUSG00000029059, ENSMUSG00000030168, ENSMUSG00000028944	1800	124	22680	1.62581	1	0.269619	61.8936
GOTERM_BP_DIRECT	GO:0001843~neural tube closure	14	0.75594	0.0687796	ENSMUSG00000022568, ENSMUSG00000029050, ENSMUSG00000017009, ENSMUSG00000026121, ENSMUSG00000025235, ENSMUSG00000029276, ENSMUSG00000028266, ENSMUSG00000005034, ENSMUSG00000020173, ENSMUSG00000031523, ENSMUSG00000074227, ENSMUSG00000019979, ENSMUSG00000002496, ENSMUSG00000026556	1545	97	18082	1.68917	1	0.918068	73.5645
UP_KEYWORDS	Polymorphism	24	1.2959	0.0688222	ENSMUSG00000036352, ENSMUSG00000016995, ENSMUSG00000022451, ENSMUSG00000044573, ENSMUSG00000047215, ENSMUSG00000092607, ENSMUSG00000035547, ENSMUSG00000000751, ENSMUSG00000040697, ENSMUSG00000029434, ENSMUSG00000026670, ENSMUSG00000002459, ENSMUSG00000037872, ENSMUSG00000020167, ENSMUSG00000020432, ENSMUSG00000030302, ENSMUSG00000048251, ENSMUSG00000051518, ENSMUSG00000026959, ENSMUSG00000025534,…	1800	209	22680	1.44689	1	0.275874	63.2845
GOTERM_CC_DIRECT	GO:0008076~voltage-gated potassium channel complex	12	0.647948	0.0712072	ENSMUSG00000016346, ENSMUSG00000047976, ENSMUSG00000038077, ENSMUSG00000027895, ENSMUSG00000036438, ENSMUSG00000029088, ENSMUSG00000028931, ENSMUSG00000053519, ENSMUSG00000031078, ENSMUSG00000019370, ENSMUSG00000037624, ENSMUSG00000036815	1677	79	19662	1.78094	1	0.443332	67.7803
UP_KEYWORDS	Kinase	68	3.67171	0.0722321	ENSMUSG00000037664, ENSMUSG00000024969, ENSMUSG00000002550, ENSMUSG00000025855, ENSMUSG00000053137, ENSMUSG00000029471, ENSMUSG00000041720, ENSMUSG00000002413, ENSMUSG00000071654, ENSMUSG00000021820, ENSMUSG00000042249, ENSMUSG00000053693, ENSMUSG00000024867, ENSMUSG00000003534, ENSMUSG00000028944, ENSMUSG00000057897, ENSMUSG00000020115, ENSMUSG00000001270, ENSMUSG00000030849, ENSMUSG00000037989,…	1800	707	22680	1.21188	1	0.285224	65.1292
GOTERM_BP_DIRECT	GO:0051865~protein autoubiquitination	9	0.485961	0.0723478	ENSMUSG00000028557, ENSMUSG00000020496, ENSMUSG00000020390, ENSMUSG00000026792, ENSMUSG00000030788, ENSMUSG00000038876, ENSMUSG00000039615, ENSMUSG00000041740, ENSMUSG00000031751	1545	52	18082	2.02562	1	0.926809	75.393
GOTERM_CC_DIRECT	GO:0030658~transport vesicle membrane	6	0.323974	0.0748115	ENSMUSG00000019590, ENSMUSG00000037852, ENSMUSG00000004319, ENSMUSG00000079657, ENSMUSG00000051343, ENSMUSG00000021248	1677	27	19662	2.60545	1	0.456928	69.6449
GOTERM_CC_DIRECT	GO:0031462~Cul2-RING ubiquitin ligase complex	4	0.215983	0.0760019	ENSMUSG00000055839, ENSMUSG00000051355, ENSMUSG00000029276, ENSMUSG00000051234	1677	12	19662	3.90817	1	0.459109	70.2383
GOTERM_CC_DIRECT	GO:0030123~AP-3 adaptor complex	4	0.215983	0.0760019	ENSMUSG00000027291, ENSMUSG00000029434, ENSMUSG00000063801, ENSMUSG00000062444	1677	12	19662	3.90817	1	0.459109	70.2383
GOTERM_BP_DIRECT	GO:0042416~dopamine biosynthetic process	4	0.215983	0.0763159	ENSMUSG00000025889, ENSMUSG00000000214, ENSMUSG00000061740, ENSMUSG00000026826	1545	12	18082	3.90119	1	0.9355	77.2857
GOTERM_BP_DIRECT	GO:0010035~response to inorganic substance	4	0.215983	0.0763159	ENSMUSG00000016349, ENSMUSG00000020475, ENSMUSG00000051149, ENSMUSG00000026826	1545	12	18082	3.90119	1	0.9355	77.2857
GOTERM_BP_DIRECT	GO:0006120~mitochondrial electron transport, NADH to ubiquinone	4	0.215983	0.0763159	ENSMUSG00000024099, ENSMUSG00000026260, ENSMUSG00000025204, ENSMUSG00000021606	1545	12	18082	3.90119	1	0.9355	77.2857
GOTERM_BP_DIRECT	GO:1901673~regulation of mitotic spindle assembly	4	0.215983	0.0763159	ENSMUSG00000031971, ENSMUSG00000000743, ENSMUSG00000022604, ENSMUSG00000033916	1545	12	18082	3.90119	1	0.9355	77.2857
GOTERM_BP_DIRECT	GO:1904322~cellular response to forskolin	4	0.215983	0.0763159	ENSMUSG00000022994, ENSMUSG00000029245, ENSMUSG00000032051, ENSMUSG00000021536	1545	12	18082	3.90119	1	0.9355	77.2857
GOTERM_BP_DIRECT	GO:0010447~response to acidic pH	4	0.215983	0.0763159	ENSMUSG00000004366, ENSMUSG00000020704, ENSMUSG00000000753, ENSMUSG00000021190	1545	12	18082	3.90119	1	0.9355	77.2857
UP_KEYWORDS	Sarcoplasmic reticulum	7	0.37797	0.0767646	ENSMUSG00000021820, ENSMUSG00000027944, ENSMUSG00000003814, ENSMUSG00000034659, ENSMUSG00000028207, ENSMUSG00000020635, ENSMUSG00000057897	1800	38	22680	2.32105	1	0.298093	67.4483
GOTERM_BP_DIRECT	GO:0006635~fatty acid beta-oxidation	8	0.431965	0.0774954	ENSMUSG00000018574, ENSMUSG00000040374, ENSMUSG00000023832, ENSMUSG00000007783, ENSMUSG00000028127, ENSMUSG00000025745, ENSMUSG00000062480, ENSMUSG00000032047	1545	44	18082	2.12792	1	0.936858	77.8212
GOTERM_BP_DIRECT	GO:0010976~positive regulation of neuron projection development	18	0.971922	0.0797425	ENSMUSG00000030854, ENSMUSG00000024969, ENSMUSG00000026925, ENSMUSG00000025147, ENSMUSG00000017802, ENSMUSG00000019194, ENSMUSG00000000753, ENSMUSG00000057455, ENSMUSG00000042453, ENSMUSG00000002489, ENSMUSG00000037601, ENSMUSG00000039145, ENSMUSG00000022674, ENSMUSG00000034675, ENSMUSG00000051149, ENSMUSG00000032475, ENSMUSG00000059456, ENSMUSG00000057897	1545	138	18082	1.52655	1	0.940558	78.8085
GOTERM_BP_DIRECT	GO:0016311~dephosphorylation	15	0.809935	0.0803561	ENSMUSG00000022040, ENSMUSG00000033295, ENSMUSG00000030854, ENSMUSG00000030002, ENSMUSG00000028771, ENSMUSG00000030203, ENSMUSG00000034616, ENSMUSG00000024539, ENSMUSG00000020736, ENSMUSG00000042662, ENSMUSG00000038042, ENSMUSG00000018648, ENSMUSG00000028399, ENSMUSG00000039431, ENSMUSG00000028909	1545	109	18082	1.61058	1	0.940541	79.0707
UP_KEYWORDS	Potassium transport	14	0.75594	0.080958	ENSMUSG00000016346, ENSMUSG00000047976, ENSMUSG00000038077, ENSMUSG00000040907, ENSMUSG00000026576, ENSMUSG00000027895, ENSMUSG00000044216, ENSMUSG00000028931, ENSMUSG00000029088, ENSMUSG00000017765, ENSMUSG00000041329, ENSMUSG00000053519, ENSMUSG00000038026, ENSMUSG00000037624	1800	107	22680	1.6486	1	0.309426	69.4654
GOTERM_BP_DIRECT	GO:0006665~sphingolipid metabolic process	7	0.37797	0.0821635	ENSMUSG00000023021, ENSMUSG00000021036, ENSMUSG00000000214, ENSMUSG00000021003, ENSMUSG00000032854, ENSMUSG00000021468, ENSMUSG00000017707	1545	36	18082	2.27569	1	0.943053	79.8255
GOTERM_BP_DIRECT	GO:0032543~mitochondrial translation	7	0.37797	0.0821635	ENSMUSG00000049960, ENSMUSG00000026273, ENSMUSG00000037531, ENSMUSG00000020477, ENSMUSG00000054312, ENSMUSG00000014551, ENSMUSG00000045948	1545	36	18082	2.27569	1	0.943053	79.8255
GOTERM_BP_DIRECT	GO:0007050~cell cycle arrest	12	0.647948	0.082808	ENSMUSG00000037664, ENSMUSG00000022105, ENSMUSG00000026667, ENSMUSG00000029161, ENSMUSG00000044820, ENSMUSG00000004936, ENSMUSG00000025499, ENSMUSG00000003814, ENSMUSG00000039128, ENSMUSG00000014402, ENSMUSG00000075334, ENSMUSG00000096472	1545	81	18082	1.73386	1	0.943085	80.0884
GOTERM_BP_DIRECT	GO:0055085~transmembrane transport	40	2.15983	0.0834441	ENSMUSG00000002105, ENSMUSG00000016346, ENSMUSG00000026791, ENSMUSG00000004319, ENSMUSG00000029924, ENSMUSG00000031974, ENSMUSG00000029151, ENSMUSG00000022843, ENSMUSG00000024327, ENSMUSG00000063652, ENSMUSG00000038267, ENSMUSG00000020744, ENSMUSG00000064329, ENSMUSG00000021240, ENSMUSG00000038212, ENSMUSG00000025759, ENSMUSG00000017765, ENSMUSG00000042078, ENSMUSG00000041654, ENSMUSG00000024270,…	1545	364	18082	1.28611	1	0.943099	80.3446
GOTERM_CC_DIRECT	GO:0001891~phagocytic cup	5	0.269978	0.0849259	ENSMUSG00000024397, ENSMUSG00000001847, ENSMUSG00000030707, ENSMUSG00000052298, ENSMUSG00000068923	1677	20	19662	2.93113	1	0.495047	74.3531
GOTERM_CC_DIRECT	GO:0097225~sperm midpiece	5	0.269978	0.0849259	ENSMUSG00000000682, ENSMUSG00000042249, ENSMUSG00000037196, ENSMUSG00000016637, ENSMUSG00000015837	1677	20	19662	2.93113	1	0.495047	74.3531
GOTERM_BP_DIRECT	GO:0046928~regulation of neurotransmitter secretion	5	0.269978	0.0853452	ENSMUSG00000025889, ENSMUSG00000039714, ENSMUSG00000027895, ENSMUSG00000023064, ENSMUSG00000062995	1545	20	18082	2.92589	1	0.945624	81.092
GOTERM_BP_DIRECT	GO:0090398~cellular senescence	5	0.269978	0.0853452	ENSMUSG00000021948, ENSMUSG00000004936, ENSMUSG00000025499, ENSMUSG00000020644, ENSMUSG00000003814	1545	20	18082	2.92589	1	0.945624	81.092
GOTERM_BP_DIRECT	GO:0045921~positive regulation of exocytosis	6	0.323974	0.0854625	ENSMUSG00000054423, ENSMUSG00000022159, ENSMUSG00000017978, ENSMUSG00000054459, ENSMUSG00000042632, ENSMUSG00000026797	1545	28	18082	2.50791	1	0.944613	81.1372
GOTERM_BP_DIRECT	GO:0051881~regulation of mitochondrial membrane potential	6	0.323974	0.0854625	ENSMUSG00000025968, ENSMUSG00000028964, ENSMUSG00000028756, ENSMUSG00000025140, ENSMUSG00000024997, ENSMUSG00000028982	1545	28	18082	2.50791	1	0.944613	81.1372
GOTERM_BP_DIRECT	GO:0048169~regulation of long-term neuronal synaptic plasticity	6	0.323974	0.0854625	ENSMUSG00000025889, ENSMUSG00000041670, ENSMUSG00000026959, ENSMUSG00000025499, ENSMUSG00000031980, ENSMUSG00000057897	1545	28	18082	2.50791	1	0.944613	81.1372
GOTERM_BP_DIRECT	GO:0050770~regulation of axonogenesis	6	0.323974	0.0854625	ENSMUSG00000024969, ENSMUSG00000030093, ENSMUSG00000034616, ENSMUSG00000026959, ENSMUSG00000047712, ENSMUSG00000056486	1545	28	18082	2.50791	1	0.944613	81.1372
GOTERM_BP_DIRECT	GO:0051291~protein heterooligomerization	13	0.701944	0.0860249	ENSMUSG00000063882, ENSMUSG00000004936, ENSMUSG00000020428, ENSMUSG00000002413, ENSMUSG00000057367, ENSMUSG00000033916, ENSMUSG00000027950, ENSMUSG00000035864, ENSMUSG00000028931, ENSMUSG00000025499, ENSMUSG00000002496, ENSMUSG00000015837, ENSMUSG00000037316	1545	91	18082	1.67194	1	0.944475	81.3527
GOTERM_CC_DIRECT	GO:0000127~transcription factor TFIIIC complex	3	0.161987	0.0864587	ENSMUSG00000032777, ENSMUSG00000026816, ENSMUSG00000106864	1677	6	19662	5.86225	1	0.498175	75.0039
GOTERM_CC_DIRECT	GO:0005746~mitochondrial respiratory chain	3	0.161987	0.0864587	ENSMUSG00000048967, ENSMUSG00000032330, ENSMUSG00000049387, ENSMUSG00000036199	1677	6	19662	5.86225	1	0.498175	75.0039
GOTERM_CC_DIRECT	GO:0042584~chromaffin granule membrane	3	0.161987	0.0864587	ENSMUSG00000037685, ENSMUSG00000035864, ENSMUSG00000021814	1677	6	19662	5.86225	1	0.498175	75.0039
GOTERM_BP_DIRECT	GO:0048858~cell projection morphogenesis	3	0.161987	0.0867219	ENSMUSG00000016664, ENSMUSG00000022972, ENSMUSG00000057897	1545	6	18082	5.85178	1	0.9446	81.6164
GOTERM_BP_DIRECT	GO:1902305~regulation of sodium ion transmembrane transport	3	0.161987	0.0867219	ENSMUSG00000026463, ENSMUSG00000022523, ENSMUSG00000027488	1545	6	18082	5.85178	1	0.9446	81.6164
GOTERM_BP_DIRECT	GO:0048562~embryonic organ morphogenesis	3	0.161987	0.0867219	ENSMUSG00000034701, ENSMUSG00000030849, ENSMUSG00000024990	1545	6	18082	5.85178	1	0.9446	81.6164
GOTERM_BP_DIRECT	GO:0070995~NADPH oxidation	3	0.161987	0.0867219	ENSMUSG00000028931, ENSMUSG00000032051, ENSMUSG00000040181	1545	6	18082	5.85178	1	0.9446	81.6164
GOTERM_BP_DIRECT	GO:0071577~zinc II ion transmembrane transport	3	0.161987	0.0867219	ENSMUSG00000024270, ENSMUSG00000002105, ENSMUSG00000024327	1545	6	18082	5.85178	1	0.9446	81.6164
GOTERM_BP_DIRECT	GO:0006531~aspartate metabolic process	3	0.161987	0.0867219	ENSMUSG00000015961, ENSMUSG00000031672, ENSMUSG00000025190	1545	6	18082	5.85178	1	0.9446	81.6164
GOTERM_BP_DIRECT	GO:1902083~negative regulation of peptidyl-cysteine S-nitrosylation	3	0.161987	0.0867219	ENSMUSG00000026463, ENSMUSG00000039697, ENSMUSG00000027488	1545	6	18082	5.85178	1	0.9446	81.6164
GOTERM_BP_DIRECT	GO:0008635~activation of cysteine-type endopeptidase activity involved in apoptotic process by cytochrome c	3	0.161987	0.0867219	ENSMUSG00000029433, ENSMUSG00000019979, ENSMUSG00000063694	1545	6	18082	5.85178	1	0.9446	81.6164
GOTERM_BP_DIRECT	GO:0051084~'de novo' posttranslational protein folding	3	0.161987	0.0867219	ENSMUSG00000034203, ENSMUSG00000037062, ENSMUSG00000021236	1545	6	18082	5.85178	1	0.9446	81.6164
GOTERM_BP_DIRECT	GO:0030913~paranodal junction assembly	3	0.161987	0.0867219	ENSMUSG00000026442, ENSMUSG00000030342, ENSMUSG00000032854	1545	6	18082	5.85178	1	0.9446	81.6164
GOTERM_CC_DIRECT	GO:0005654~nucleoplasm	182	9.82721	0.0898228	ENSMUSG00000020471, ENSMUSG00000001518, ENSMUSG00000031781, ENSMUSG00000006906, ENSMUSG00000053137, ENSMUSG00000025104, ENSMUSG00000027968, ENSMUSG00000051234, ENSMUSG00000056429, ENSMUSG00000024824, ENSMUSG00000026946, ENSMUSG00000020262, ENSMUSG00000060639, ENSMUSG00000051518, ENSMUSG00000032040, ENSMUSG00000024826, ENSMUSG00000037373, ENSMUSG00000038042, ENSMUSG00000040536, ENSMUSG00000034891,…	1677	1935	19662	1.10277	1	0.508749	76.3786
GOTERM_BP_DIRECT	GO:0031648~protein destabilization	7	0.37797	0.091339	ENSMUSG00000036840, ENSMUSG00000025889, ENSMUSG00000040374, ENSMUSG00000051355, ENSMUSG00000022365, ENSMUSG00000020238, ENSMUSG00000020184	1545	37	18082	2.21419	1	0.951766	83.2763
GOTERM_BP_DIRECT	GO:0031338~regulation of vesicle fusion	7	0.37797	0.091339	ENSMUSG00000052302, ENSMUSG00000023923, ENSMUSG00000024261, ENSMUSG00000003134, ENSMUSG00000042216, ENSMUSG00000042492, ENSMUSG00000039976	1545	37	18082	2.21419	1	0.951766	83.2763
GOTERM_BP_DIRECT	GO:0050808~synapse organization	7	0.37797	0.091339	ENSMUSG00000034891, ENSMUSG00000025889, ENSMUSG00000030302, ENSMUSG00000030093, ENSMUSG00000026442, ENSMUSG00000023064, ENSMUSG00000051790	1545	37	18082	2.21419	1	0.951766	83.2763
GOTERM_BP_DIRECT	GO:0008306~associative learning	7	0.37797	0.091339	ENSMUSG00000042453, ENSMUSG00000038255, ENSMUSG00000027950, ENSMUSG00000055078, ENSMUSG00000053310, ENSMUSG00000026959, ENSMUSG00000030720	1545	37	18082	2.21419	1	0.951766	83.2763
GOTERM_CC_DIRECT	GO:0030133~transport vesicle	10	0.539957	0.0920627	ENSMUSG00000021252, ENSMUSG00000025582, ENSMUSG00000059361, ENSMUSG00000032182, ENSMUSG00000028029, ENSMUSG00000032570, ENSMUSG00000048978, ENSMUSG00000019890, ENSMUSG00000029428, ENSMUSG00000028789	1677	64	19662	1.83195	1	0.514476	77.2543
GOTERM_CC_DIRECT	GO:0005776~autophagosome	10	0.539957	0.0920627	ENSMUSG00000023923, ENSMUSG00000034789, ENSMUSG00000042628, ENSMUSG00000033124, ENSMUSG00000002265, ENSMUSG00000030720, ENSMUSG00000029434, ENSMUSG00000005312, ENSMUSG00000038520, ENSMUSG00000015837	1677	64	19662	1.83195	1	0.514476	77.2543
GOTERM_BP_DIRECT	GO:0006779~porphyrin-containing compound biosynthetic process	4	0.215983	0.0931411	ENSMUSG00000028684, ENSMUSG00000062729, ENSMUSG00000023030, ENSMUSG00000032126	1545	13	18082	3.6011	1	0.953637	83.8848
GOTERM_BP_DIRECT	GO:0045651~positive regulation of macrophage differentiation	4	0.215983	0.0931411	ENSMUSG00000022105, ENSMUSG00000014599, ENSMUSG00000020644, ENSMUSG00000031750	1545	13	18082	3.6011	1	0.953637	83.8848
GOTERM_BP_DIRECT	GO:0042407~cristae formation	4	0.215983	0.0931411	ENSMUSG00000005299, ENSMUSG00000071654, ENSMUSG00000049760, ENSMUSG00000030086	1545	13	18082	3.6011	1	0.953637	83.8848
GOTERM_BP_DIRECT	GO:0016024~CDP-diacylglycerol biosynthetic process	4	0.215983	0.0931411	ENSMUSG00000024978, ENSMUSG00000001211, ENSMUSG00000030316, ENSMUSG00000031545	1545	13	18082	3.6011	1	0.953637	83.8848
UP_KEYWORDS	Heme biosynthesis	4	0.215983	0.0938876	ENSMUSG00000018677, ENSMUSG00000028684, ENSMUSG00000062729, ENSMUSG00000032126	1800	14	22680	3.6	1	0.348129	74.9777
GOTERM_BP_DIRECT	GO:0006099~tricarboxylic acid cycle	6	0.323974	0.0963667	ENSMUSG00000021748, ENSMUSG00000026526, ENSMUSG00000000171, ENSMUSG00000020321, ENSMUSG00000025950, ENSMUSG00000027406	1545	29	18082	2.42143	1	0.95755	84.922
GOTERM_BP_DIRECT	GO:0035249~synaptic transmission, glutamatergic	6	0.323974	0.0963667	ENSMUSG00000027438, ENSMUSG00000017412, ENSMUSG00000034799, ENSMUSG00000004319, ENSMUSG00000026959, ENSMUSG00000024873	1545	29	18082	2.42143	1	0.95755	84.922
GOTERM_BP_DIRECT	GO:0090102~cochlea development	6	0.323974	0.0963667	ENSMUSG00000030302, ENSMUSG00000055078, ENSMUSG00000038248, ENSMUSG00000026556, ENSMUSG00000016637, ENSMUSG00000037624	1545	29	18082	2.42143	1	0.95755	84.922
GOTERM_CC_DIRECT	GO:0043234~protein complex	64	3.45572	0.098579	ENSMUSG00000016346, ENSMUSG00000030218, ENSMUSG00000024862, ENSMUSG00000024966, ENSMUSG00000027488, ENSMUSG00000034868, ENSMUSG00000020538, ENSMUSG00000091971, ENSMUSG00000005716, ENSMUSG00000060639, ENSMUSG00000015869, ENSMUSG00000022789, ENSMUSG00000038412, ENSMUSG00000046442, ENSMUSG00000002496, ENSMUSG00000022604, ENSMUSG00000024411, ENSMUSG00000021025, ENSMUSG00000031557, ENSMUSG00000031751,…	1677	628	19662	1.19485	1	0.536597	79.6325
GOTERM_BP_DIRECT	GO:0000302~response to reactive oxygen species	5	0.269978	0.0986287	ENSMUSG00000029167, ENSMUSG00000018585, ENSMUSG00000027187, ENSMUSG00000035984, ENSMUSG00000026701	1545	21	18082	2.78656	1	0.959788	85.6113
GOTERM_BP_DIRECT	GO:0045666~positive regulation of neuron differentiation	14	0.75594	0.0994756	ENSMUSG00000038255, ENSMUSG00000034701, ENSMUSG00000021743, ENSMUSG00000013089, ENSMUSG00000022508, ENSMUSG00000041120, ENSMUSG00000039533, ENSMUSG00000020167, ENSMUSG00000027434, ENSMUSG00000010086, ENSMUSG00000057778, ENSMUSG00000020027, ENSMUSG00000042182, ENSMUSG00000024163	1545	103	18082	1.59078	1	0.959999	85.8617
UP_KEYWORDS	Iron	38	2.05184	0.0999749	ENSMUSG00000037916, ENSMUSG00000025968, ENSMUSG00000031781, ENSMUSG00000027618, ENSMUSG00000001467, ENSMUSG00000028207, ENSMUSG00000029475, ENSMUSG00000026279, ENSMUSG00000019590, ENSMUSG00000044795, ENSMUSG00000058709, ENSMUSG00000000171, ENSMUSG00000061740, ENSMUSG00000057134, ENSMUSG00000020810, ENSMUSG00000031604, ENSMUSG00000024039, ENSMUSG00000037499, ENSMUSG00000059734, ENSMUSG00000024099,…	1800	375	22680	1.2768	1	0.363964	77.239
GOTERM_BP_DIRECT	GO:0045116~protein neddylation	5	0.269978	0.0336893	ENSMUSG00000048787, ENSMUSG00000005575, ENSMUSG00000031878, ENSMUSG00000010376, ENSMUSG00000051234	1545	15	18082	3.90119	1	0.814381	47.2616
GOTERM_BP_DIRECT	GO:0006979~response to oxidative stress	19	1.02592	0.0340182	ENSMUSG00000054733, ENSMUSG00000059734, ENSMUSG00000022450, ENSMUSG00000028964, ENSMUSG00000004936, ENSMUSG00000030652, ENSMUSG00000031714, ENSMUSG00000027187, ENSMUSG00000024997, ENSMUSG00000022820, ENSMUSG00000018585, ENSMUSG00000022193, ENSMUSG00000021820, ENSMUSG00000021948, ENSMUSG00000028756, ENSMUSG00000020810, ENSMUSG00000024953, ENSMUSG00000025950, ENSMUSG00000028484	1545	133	18082	1.67194	1	0.813815	47.5957
UP_KEYWORDS	Exocytosis	11	0.593952	0.0343931	ENSMUSG00000053841, ENSMUSG00000039714, ENSMUSG00000054423, ENSMUSG00000034799, ENSMUSG00000041670, ENSMUSG00000033615, ENSMUSG00000017978, ENSMUSG00000040722, ENSMUSG00000003872, ENSMUSG00000062151, ENSMUSG00000035226	1800	66	22680	2.1	1	0.174536	38.8575
UP_KEYWORDS	Alternative initiation	11	0.593952	0.0343931	ENSMUSG00000054733, ENSMUSG00000026526, ENSMUSG00000061751, ENSMUSG00000028416, ENSMUSG00000032101, ENSMUSG00000027636, ENSMUSG00000027618, ENSMUSG00000024953, ENSMUSG00000000552, ENSMUSG00000020184, ENSMUSG00000030067	1800	66	22680	2.1	1	0.174536	38.8575
GOTERM_MF_DIRECT	GO:0004842~ubiquitin-protein transferase activity	38	2.05184	0.0344958	ENSMUSG00000020496, ENSMUSG00000026792, ENSMUSG00000021071, ENSMUSG00000005371, ENSMUSG00000038965, ENSMUSG00000029634, ENSMUSG00000032507, ENSMUSG00000055707, ENSMUSG00000039615, ENSMUSG00000027466, ENSMUSG00000041740, ENSMUSG00000029312, ENSMUSG00000051234, ENSMUSG00000070923, ENSMUSG00000030788, ENSMUSG00000036840, ENSMUSG00000040351, ENSMUSG00000038780, ENSMUSG00000021774, ENSMUSG00000078484,…	1457	326	17446	1.39573	1	0.625515	43.7564
INTERPRO	IPR016040:NAD(P)-binding domain	25	1.34989	0.034655	ENSMUSG00000058240, ENSMUSG00000020321, ENSMUSG00000026675, ENSMUSG00000028961, ENSMUSG00000024556, ENSMUSG00000030905, ENSMUSG00000053398, ENSMUSG00000066441, ENSMUSG00000062729, ENSMUSG00000027195, ENSMUSG00000025745, ENSMUSG00000040181, ENSMUSG00000025153, ENSMUSG00000025140, ENSMUSG00000031878, ENSMUSG00000016194, ENSMUSG00000020917, ENSMUSG00000000399, ENSMUSG00000022223, ENSMUSG00000002332,…	1681	199	20594	1.53908	1	0.937255	46.096
GOTERM_BP_DIRECT	GO:0046627~negative regulation of insulin receptor signaling pathway	8	0.431965	0.0347563	ENSMUSG00000033295, ENSMUSG00000024539, ENSMUSG00000021948, ENSMUSG00000020027, ENSMUSG00000020176, ENSMUSG00000032737, ENSMUSG00000002496, ENSMUSG00000053113	1545	37	18082	2.5305	1	0.817022	48.3383
GOTERM_BP_DIRECT	GO:0019226~transmission of nerve impulse	6	0.323974	0.0348366	ENSMUSG00000016346, ENSMUSG00000011751, ENSMUSG00000019146, ENSMUSG00000026442, ENSMUSG00000031990, ENSMUSG00000045092	1545	22	18082	3.19188	1	0.814192	48.4185
GOTERM_MF_DIRECT	GO:0005254~chloride channel activity	11	0.593952	0.0349036	ENSMUSG00000020436, ENSMUSG00000004319, ENSMUSG00000055078, ENSMUSG00000036570, ENSMUSG00000010803, ENSMUSG00000029211, ENSMUSG00000020428, ENSMUSG00000000560, ENSMUSG00000057092, ENSMUSG00000022843, ENSMUSG00000029054	1457	63	17446	2.09068	1	0.622331	44.1446
GOTERM_MF_DIRECT	GO:0017080~sodium channel regulator activity	7	0.37797	0.0349614	ENSMUSG00000036570, ENSMUSG00000026463, ENSMUSG00000009687, ENSMUSG00000022523, ENSMUSG00000019194, ENSMUSG00000057092, ENSMUSG00000027488	1457	30	17446	2.79391	1	0.615523	44.1993
GOTERM_CC_DIRECT	GO:0005925~focal adhesion	45	2.42981	0.0351105	ENSMUSG00000004530, ENSMUSG00000022451, ENSMUSG00000008136, ENSMUSG00000047215, ENSMUSG00000060036, ENSMUSG00000032504, ENSMUSG00000003814, ENSMUSG00000001847, ENSMUSG00000041720, ENSMUSG00000061787, ENSMUSG00000017144, ENSMUSG00000031523, ENSMUSG00000091971, ENSMUSG00000016664, ENSMUSG00000051391, ENSMUSG00000030352, ENSMUSG00000003458, ENSMUSG00000058600, ENSMUSG00000059456, ENSMUSG00000022285,…	1677	391	19662	1.34937	1	0.292239	42.1897
GOTERM_CC_DIRECT	GO:0005742~mitochondrial outer membrane translocase complex	4	0.215983	0.0351307	ENSMUSG00000028998, ENSMUSG00000033475, ENSMUSG00000028756, ENSMUSG00000078713	1677	9	19662	5.21089	1	0.289427	42.2082
GOTERM_BP_DIRECT	GO:0097178~ruffle assembly	4	0.215983	0.0352867	ENSMUSG00000024397, ENSMUSG00000032737, ENSMUSG00000001847, ENSMUSG00000037316	1545	9	18082	5.20158	1	0.814745	48.8657
GOTERM_BP_DIRECT	GO:0045955~negative regulation of calcium ion-dependent exocytosis	4	0.215983	0.0352867	ENSMUSG00000026923, ENSMUSG00000035640, ENSMUSG00000021071, ENSMUSG00000024261	1545	9	18082	5.20158	1	0.814745	48.8657
GOTERM_BP_DIRECT	GO:0000103~sulfate assimilation	4	0.215983	0.0352867	ENSMUSG00000003271, ENSMUSG00000024583, ENSMUSG00000028367, ENSMUSG00000005354	1545	9	18082	5.20158	1	0.814745	48.8657
GOTERM_BP_DIRECT	GO:0006412~translation	46	2.4838	0.0355238	ENSMUSG00000029610, ENSMUSG00000026618, ENSMUSG00000018677, ENSMUSG00000049960, ENSMUSG00000030738, ENSMUSG00000047215, ENSMUSG00000019774, ENSMUSG00000060036, ENSMUSG00000016349, ENSMUSG00000015672, ENSMUSG00000045973, ENSMUSG00000054312, ENSMUSG00000061787, ENSMUSG00000022312, ENSMUSG00000052962, ENSMUSG00000028982, ENSMUSG00000020744, ENSMUSG00000021266, ENSMUSG00000027613, ENSMUSG00000049751,…	1545	401	18082	1.34255	1	0.813383	49.0999
UP_KEYWORDS	Neurogenesis	29	1.56587	0.0355534	ENSMUSG00000036955, ENSMUSG00000034701, ENSMUSG00000028949, ENSMUSG00000026121, ENSMUSG00000021743, ENSMUSG00000056596, ENSMUSG00000032368, ENSMUSG00000004558, ENSMUSG00000041609, ENSMUSG00000026259, ENSMUSG00000037601, ENSMUSG00000019647, ENSMUSG00000021820, ENSMUSG00000034675, ENSMUSG00000021451, ENSMUSG00000057778, ENSMUSG00000057897, ENSMUSG00000038255, ENSMUSG00000029600, ENSMUSG00000029245,…	1800	247	22680	1.47935	1	0.177869	39.8822
UP_KEYWORDS	Lipid transport	13	0.701944	0.0356445	ENSMUSG00000036078, ENSMUSG00000040430, ENSMUSG00000074968, ENSMUSG00000035189, ENSMUSG00000040564, ENSMUSG00000037685, ENSMUSG00000030741, ENSMUSG00000031672, ENSMUSG00000020435, ENSMUSG00000024797, ENSMUSG00000028559, ENSMUSG00000034088, ENSMUSG00000017754	1800	85	22680	1.92706	1	0.176244	39.9619
INTERPRO	IPR016637:Transcription factor, basic helix-loop-helix, NeuroD	3	0.161987	0.0357037	ENSMUSG00000037984, ENSMUSG00000038255, ENSMUSG00000034701	1681	4	20594	9.18828	1	0.93683	47.1129
INTERPRO	IPR006162:Phosphopantetheine attachment site	3	0.161987	0.0357037	ENSMUSG00000020256, ENSMUSG00000025153, ENSMUSG00000030869	1681	4	20594	9.18828	1	0.93683	47.1129
INTERPRO	IPR022575:Neurogenic differentiation factor, domain of unknown function	3	0.161987	0.0357037	ENSMUSG00000037984, ENSMUSG00000038255, ENSMUSG00000034701	1681	4	20594	9.18828	1	0.93683	47.1129
GOTERM_MF_DIRECT	GO:0005509~calcium ion binding	73	3.94168	0.0357151	ENSMUSG00000043154, ENSMUSG00000027347, ENSMUSG00000051980, ENSMUSG00000093803, ENSMUSG00000030218, ENSMUSG00000020848, ENSMUSG00000024261, ENSMUSG00000029471, ENSMUSG00000027489, ENSMUSG00000019370, ENSMUSG00000042286, ENSMUSG00000002413, ENSMUSG00000034868, ENSMUSG00000022887, ENSMUSG00000029544, ENSMUSG00000005716, ENSMUSG00000051375, ENSMUSG00000036438, ENSMUSG00000055421, ENSMUSG00000006800,…	1457	699	17446	1.2505	1	0.616227	44.9095
INTERPRO	IPR011993:Pleckstrin homology-like domain	45	2.42981	0.036139	ENSMUSG00000021708, ENSMUSG00000017978, ENSMUSG00000021662, ENSMUSG00000020176, ENSMUSG00000031714, ENSMUSG00000035109, ENSMUSG00000026259, ENSMUSG00000027488, ENSMUSG00000032875, ENSMUSG00000041225, ENSMUSG00000017670, ENSMUSG00000020435, ENSMUSG00000040631, ENSMUSG00000024227, ENSMUSG00000042249, ENSMUSG00000026014, ENSMUSG00000040797, ENSMUSG00000026825, ENSMUSG00000030064, ENSMUSG00000028923,…	1681	409	20594	1.34791	1	0.933387	47.5297
GOTERM_BP_DIRECT	GO:0008152~metabolic process	52	2.80778	0.0362361	ENSMUSG00000021036, ENSMUSG00000002550, ENSMUSG00000023832, ENSMUSG00000031781, ENSMUSG00000020475, ENSMUSG00000031545, ENSMUSG00000026670, ENSMUSG00000029545, ENSMUSG00000018574, ENSMUSG00000060376, ENSMUSG00000054008, ENSMUSG00000006800, ENSMUSG00000037373, ENSMUSG00000062480, ENSMUSG00000032047, ENSMUSG00000074264, ENSMUSG00000024556, ENSMUSG00000053398, ENSMUSG00000025745, ENSMUSG00000025153,…	1545	463	18082	1.31444	1	0.816247	49.7971
INTERPRO	IPR004148:BAR domain	5	0.269978	0.0363074	ENSMUSG00000030766, ENSMUSG00000037062, ENSMUSG00000033389, ENSMUSG00000003200, ENSMUSG00000026860	1681	16	20594	3.82845	1	0.928584	47.6901
UP_SEQ_FEATURE	calcium-binding region:2	18	0.971922	0.0363298	ENSMUSG00000027347, ENSMUSG00000024397, ENSMUSG00000009075, ENSMUSG00000030824, ENSMUSG00000019370, ENSMUSG00000029544, ENSMUSG00000037493, ENSMUSG00000005716, ENSMUSG00000036438, ENSMUSG00000029161, ENSMUSG00000054459, ENSMUSG00000029088, ENSMUSG00000053519, ENSMUSG00000021576, ENSMUSG00000015143, ENSMUSG00000028785, ENSMUSG00000040659, ENSMUSG00000019539	1687	114	18012	1.68583	1	0.999778	49.1284
GOTERM_CC_DIRECT	GO:0005764~lysosome	39	2.10583	0.0366584	ENSMUSG00000027534, ENSMUSG00000050732, ENSMUSG00000007891, ENSMUSG00000029434, ENSMUSG00000002320, ENSMUSG00000057506, ENSMUSG00000029151, ENSMUSG00000022848, ENSMUSG00000020100, ENSMUSG00000025759, ENSMUSG00000025534, ENSMUSG00000021477, ENSMUSG00000025512, ENSMUSG00000022620, ENSMUSG00000090247, ENSMUSG00000002496, ENSMUSG00000035629, ENSMUSG00000021124, ENSMUSG00000035805, ENSMUSG00000027291,…	1677	331	19662	1.38144	1	0.297124	43.5954
GOTERM_CC_DIRECT	GO:0005623~cell	29	1.56587	0.0369982	ENSMUSG00000027534, ENSMUSG00000024583, ENSMUSG00000020848, ENSMUSG00000048486, ENSMUSG00000005354, ENSMUSG00000096054, ENSMUSG00000063801, ENSMUSG00000041609, ENSMUSG00000028096, ENSMUSG00000021824, ENSMUSG00000021647, ENSMUSG00000003657, ENSMUSG00000039781, ENSMUSG00000037622, ENSMUSG00000050043, ENSMUSG00000038456, ENSMUSG00000029600, ENSMUSG00000050708, ENSMUSG00000029392, ENSMUSG00000040697,…	1677	231	19662	1.47191	1	0.296522	43.8996
UP_KEYWORDS	Magnesium	54	2.91577	0.0370503	ENSMUSG00000024969, ENSMUSG00000056124, ENSMUSG00000060579, ENSMUSG00000004267, ENSMUSG00000015961, ENSMUSG00000022994, ENSMUSG00000025035, ENSMUSG00000049734, ENSMUSG00000046442, ENSMUSG00000002844, ENSMUSG00000030316, ENSMUSG00000053693, ENSMUSG00000049225, ENSMUSG00000034187, ENSMUSG00000028945, ENSMUSG00000032570, ENSMUSG00000020736, ENSMUSG00000027546, ENSMUSG00000021279, ENSMUSG00000027108,…	1800	521	22680	1.30595	1	0.180575	41.1806
INTERPRO	IPR001849:Pleckstrin homology domain	31	1.67387	0.0372124	ENSMUSG00000021708, ENSMUSG00000017978, ENSMUSG00000021662, ENSMUSG00000020176, ENSMUSG00000031714, ENSMUSG00000026259, ENSMUSG00000027488, ENSMUSG00000041225, ENSMUSG00000017670, ENSMUSG00000020435, ENSMUSG00000040631, ENSMUSG00000024227, ENSMUSG00000026825, ENSMUSG00000026014, ENSMUSG00000042249, ENSMUSG00000038608, ENSMUSG00000054423, ENSMUSG00000011751, ENSMUSG00000037126, ENSMUSG00000028917,…	1681	262	20594	1.44955	1	0.927682	48.5441
GOTERM_MF_DIRECT	GO:0004849~uridine kinase activity	3	0.161987	0.0372681	ENSMUSG00000002550, ENSMUSG00000089917, ENSMUSG00000026558	1457	4	17446	8.98044	1	0.625031	46.346
GOTERM_MF_DIRECT	GO:0003985~acetyl-CoA C-acetyltransferase activity	3	0.161987	0.0372681	ENSMUSG00000023832, ENSMUSG00000062480, ENSMUSG00000032047	1457	4	17446	8.98044	1	0.625031	46.346
GOTERM_MF_DIRECT	GO:0043167~ion binding	3	0.161987	0.0372681	ENSMUSG00000028005, ENSMUSG00000033910, ENSMUSG00000022323	1457	4	17446	8.98044	1	0.625031	46.346
GOTERM_BP_DIRECT	GO:1903955~positive regulation of protein targeting to mitochondrion	13	0.701944	0.0383305	ENSMUSG00000030854, ENSMUSG00000038965, ENSMUSG00000026986, ENSMUSG00000046707, ENSMUSG00000037062, ENSMUSG00000020061, ENSMUSG00000028998, ENSMUSG00000029403, ENSMUSG00000026750, ENSMUSG00000064145, ENSMUSG00000041986, ENSMUSG00000032735, ENSMUSG00000028756	1545	80	18082	1.90183	1	0.830435	51.7954
SMART	SM00165:UBA	7	0.37797	0.038586	ENSMUSG00000036352, ENSMUSG00000024969, ENSMUSG00000005312, ENSMUSG00000028433, ENSMUSG00000020220, ENSMUSG00000015837, ENSMUSG00000038429	783	34	10425	2.74115	1	0.700224	42.216
GOTERM_BP_DIRECT	GO:0034765~regulation of ion transmembrane transport	19	1.02592	0.0386577	ENSMUSG00000016346, ENSMUSG00000047976, ENSMUSG00000019146, ENSMUSG00000038077, ENSMUSG00000019194, ENSMUSG00000021991, ENSMUSG00000022843, ENSMUSG00000034659, ENSMUSG00000028096, ENSMUSG00000064329, ENSMUSG00000017412, ENSMUSG00000027895, ENSMUSG00000020704, ENSMUSG00000020882, ENSMUSG00000044216, ENSMUSG00000029088, ENSMUSG00000028931, ENSMUSG00000053519, ENSMUSG00000038026	1545	135	18082	1.64717	1	0.82979	52.1007
GOTERM_CC_DIRECT	GO:0008274~gamma-tubulin ring complex	3	0.161987	0.0387831	ENSMUSG00000022671, ENSMUSG00000033186, ENSMUSG00000051786	1677	4	19662	8.79338	1	0.30562	45.4729
GOTERM_CC_DIRECT	GO:0044305~calyx of Held	3	0.161987	0.0387831	ENSMUSG00000034799, ENSMUSG00000062151, ENSMUSG00000037624	1677	4	19662	8.79338	1	0.30562	45.4729
GOTERM_BP_DIRECT	GO:1903278~positive regulation of sodium ion export from cell	3	0.161987	0.0389086	ENSMUSG00000026576, ENSMUSG00000036570, ENSMUSG00000041329	1545	4	18082	8.77767	1	0.828553	52.3335
GOTERM_BP_DIRECT	GO:0038108~negative regulation of appetite by leptin-mediated signaling pathway	3	0.161987	0.0389086	ENSMUSG00000031755, ENSMUSG00000025235, ENSMUSG00000027274	1545	4	18082	8.77767	1	0.828553	52.3335
GOTERM_BP_DIRECT	GO:0043097~pyrimidine nucleoside salvage	3	0.161987	0.0389086	ENSMUSG00000002550, ENSMUSG00000089917, ENSMUSG00000026558	1545	4	18082	8.77767	1	0.828553	52.3335
UP_KEYWORDS	Apoptosis	51	2.75378	0.038961	ENSMUSG00000029610, ENSMUSG00000028416, ENSMUSG00000031781, ENSMUSG00000029433, ENSMUSG00000060579, ENSMUSG00000036199, ENSMUSG00000032504, ENSMUSG00000033256, ENSMUSG00000031878, ENSMUSG00000027016, ENSMUSG00000061436, ENSMUSG00000017670, ENSMUSG00000004748, ENSMUSG00000014771, ENSMUSG00000024012, ENSMUSG00000021948, ENSMUSG00000002265, ENSMUSG00000024826, ENSMUSG00000019979, ENSMUSG00000026430,…	1800	489	22680	1.31411	1	0.187014	42.8
GOTERM_CC_DIRECT	GO:0043231~intracellular membrane-bounded organelle	79	4.26566	0.0392772	ENSMUSG00000002658, ENSMUSG00000020841, ENSMUSG00000017978, ENSMUSG00000020375, ENSMUSG00000024261, ENSMUSG00000027618, ENSMUSG00000001467, ENSMUSG00000019173, ENSMUSG00000016194, ENSMUSG00000002413, ENSMUSG00000020538, ENSMUSG00000003271, ENSMUSG00000025759, ENSMUSG00000022789, ENSMUSG00000024826, ENSMUSG00000039781, ENSMUSG00000002496, ENSMUSG00000020635, ENSMUSG00000021124, ENSMUSG00000026688,…	1677	751	19662	1.23334	1	0.305963	45.9011
GOTERM_BP_DIRECT	GO:0007528~neuromuscular junction development	8	0.431965	0.0395789	ENSMUSG00000017412, ENSMUSG00000034799, ENSMUSG00000019146, ENSMUSG00000061751, ENSMUSG00000020882, ENSMUSG00000030849, ENSMUSG00000029048, ENSMUSG00000027488	1545	38	18082	2.46391	1	0.830618	52.9505
INTERPRO	IPR016135:Ubiquitin-conjugating enzyme/RWD-like	10	0.539957	0.0401452	ENSMUSG00000020390, ENSMUSG00000005575, ENSMUSG00000062963, ENSMUSG00000038965, ENSMUSG00000021774, ENSMUSG00000022674, ENSMUSG00000078923, ENSMUSG00000015120, ENSMUSG00000052981, ENSMUSG00000014402	1681	57	20594	2.14931	1	0.936513	51.2224
GOTERM_MF_DIRECT	GO:0048487~beta-tubulin binding	8	0.431965	0.0403428	ENSMUSG00000034891, ENSMUSG00000026360, ENSMUSG00000025889, ENSMUSG00000023064, ENSMUSG00000025235, ENSMUSG00000051149, ENSMUSG00000037196, ENSMUSG00000068923	1457	39	17446	2.45619	1	0.647767	49.0871
UP_KEYWORDS	Lyase	19	1.02592	0.0408177	ENSMUSG00000026526, ENSMUSG00000033910, ENSMUSG00000063275, ENSMUSG00000023452, ENSMUSG00000028684, ENSMUSG00000028179, ENSMUSG00000025745, ENSMUSG00000031536, ENSMUSG00000025153, ENSMUSG00000004267, ENSMUSG00000045316, ENSMUSG00000021536, ENSMUSG00000006517, ENSMUSG00000032067, ENSMUSG00000028005, ENSMUSG00000001666, ENSMUSG00000022994, ENSMUSG00000024039, ENSMUSG00000030695	1800	146	22680	1.63973	1	0.19303	44.334
UP_KEYWORDS	Voltage-gated channel	18	0.971922	0.0410564	ENSMUSG00000016346, ENSMUSG00000047976, ENSMUSG00000019146, ENSMUSG00000038077, ENSMUSG00000019194, ENSMUSG00000021991, ENSMUSG00000034659, ENSMUSG00000022843, ENSMUSG00000028096, ENSMUSG00000064329, ENSMUSG00000017412, ENSMUSG00000027895, ENSMUSG00000020882, ENSMUSG00000044216, ENSMUSG00000029088, ENSMUSG00000028931, ENSMUSG00000053519, ENSMUSG00000038026	1800	136	22680	1.66765	1	0.191966	44.5284
KEGG_PATHWAY	mmu04141:Protein processing in endoplasmic reticulum	22	1.1879	0.0412505	ENSMUSG00000039703, ENSMUSG00000021484, ENSMUSG00000078974, ENSMUSG00000021774, ENSMUSG00000028416, ENSMUSG00000040462, ENSMUSG00000063802, ENSMUSG00000039615, ENSMUSG00000003814, ENSMUSG00000025823, ENSMUSG00000025130, ENSMUSG00000031751, ENSMUSG00000024357, ENSMUSG00000091971, ENSMUSG00000031835, ENSMUSG00000027828, ENSMUSG00000030082, ENSMUSG00000005312, ENSMUSG00000022365, ENSMUSG00000032116,…	646	168	7691	1.55906	0.999991	0.251447	42.6186
SMART	SM00593:RUN	5	0.269978	0.0412604	ENSMUSG00000041263, ENSMUSG00000028917, ENSMUSG00000020375, ENSMUSG00000035629, ENSMUSG00000042216	783	18	10425	3.69838	1	0.698161	44.4165
SMART	SM00224:GGL	5	0.269978	0.0412604	ENSMUSG00000020599, ENSMUSG00000071658, ENSMUSG00000095845, ENSMUSG00000043004, ENSMUSG00000026527	783	18	10425	3.69838	1	0.698161	44.4165
GOTERM_CC_DIRECT	GO:0000151~ubiquitin ligase complex	14	0.75594	0.0412983	ENSMUSG00000048787, ENSMUSG00000005371, ENSMUSG00000040351, ENSMUSG00000021774, ENSMUSG00000059890, ENSMUSG00000039615, ENSMUSG00000091971, ENSMUSG00000028557, ENSMUSG00000024325, ENSMUSG00000052752, ENSMUSG00000078923, ENSMUSG00000064145, ENSMUSG00000020642, ENSMUSG00000020801	1677	90	19662	1.82381	1	0.316178	47.62
INTERPRO	IPR001876:Zinc finger, RanBP2-type	6	0.323974	0.0413582	ENSMUSG00000039703, ENSMUSG00000022634, ENSMUSG00000072872, ENSMUSG00000027466, ENSMUSG00000020184, ENSMUSG00000022552	1681	24	20594	3.06276	1	0.936901	52.2912
GOTERM_BP_DIRECT	GO:0001934~positive regulation of protein phosphorylation	24	1.2959	0.0414101	ENSMUSG00000052593, ENSMUSG00000019579, ENSMUSG00000030854, ENSMUSG00000027347, ENSMUSG00000048583, ENSMUSG00000024397, ENSMUSG00000061374, ENSMUSG00000025147, ENSMUSG00000030720, ENSMUSG00000001847, ENSMUSG00000042632, ENSMUSG00000031750, ENSMUSG00000061436, ENSMUSG00000000184, ENSMUSG00000057531, ENSMUSG00000021451, ENSMUSG00000028756, ENSMUSG00000022469, ENSMUSG00000025499, ENSMUSG00000042249,…	1545	184	18082	1.52655	1	0.841205	54.5974
GOTERM_BP_DIRECT	GO:0048814~regulation of dendrite morphogenesis	6	0.323974	0.0414851	ENSMUSG00000027950, ENSMUSG00000026959, ENSMUSG00000021451, ENSMUSG00000096054, ENSMUSG00000036306, ENSMUSG00000033569	1545	23	18082	3.0531	1	0.838708	54.6636
GOTERM_BP_DIRECT	GO:2000649~regulation of sodium ion transmembrane transporter activity	5	0.269978	0.0419671	ENSMUSG00000036570, ENSMUSG00000009687, ENSMUSG00000022523, ENSMUSG00000019194, ENSMUSG00000057092	1545	16	18082	3.65736	1	0.839162	55.0874
GOTERM_BP_DIRECT	GO:0030970~retrograde protein transport, ER to cytosol	5	0.269978	0.0419671	ENSMUSG00000039703, ENSMUSG00000040462, ENSMUSG00000022365, ENSMUSG00000018442, ENSMUSG00000019295	1545	16	18082	3.65736	1	0.839162	55.0874
INTERPRO	IPR027267:Arfaptin homology (AH) domain/BAR domain	7	0.37797	0.0422033	ENSMUSG00000074513, ENSMUSG00000030766, ENSMUSG00000037062, ENSMUSG00000033389, ENSMUSG00000003200, ENSMUSG00000026860, ENSMUSG00000062995	1681	32	20594	2.67992	1	0.93572	53.0228
KEGG_PATHWAY	mmu05214:Glioma	11	0.593952	0.0429184	ENSMUSG00000022105, ENSMUSG00000036438, ENSMUSG00000021820, ENSMUSG00000004936, ENSMUSG00000025499, ENSMUSG00000025856, ENSMUSG00000019370, ENSMUSG00000002413, ENSMUSG00000035109, ENSMUSG00000020184, ENSMUSG00000057897	646	65	7691	2.01479	0.999994	0.254893	43.9209
GOTERM_MF_DIRECT	GO:0008289~lipid binding	32	1.72786	0.0433105	ENSMUSG00000027534, ENSMUSG00000024969, ENSMUSG00000017978, ENSMUSG00000020375, ENSMUSG00000003200, ENSMUSG00000018770, ENSMUSG00000031523, ENSMUSG00000006057, ENSMUSG00000062683, ENSMUSG00000020435, ENSMUSG00000016664, ENSMUSG00000022789, ENSMUSG00000029560, ENSMUSG00000001036, ENSMUSG00000040430, ENSMUSG00000054423, ENSMUSG00000019785, ENSMUSG00000020876, ENSMUSG00000037062, ENSMUSG00000031557,…	1457	270	17446	1.41913	1	0.667518	51.6077
UP_KEYWORDS	Translocation	12	0.647948	0.0433553	ENSMUSG00000015023, ENSMUSG00000027679, ENSMUSG00000013701, ENSMUSG00000052584, ENSMUSG00000020219, ENSMUSG00000031529, ENSMUSG00000078974, ENSMUSG00000030082, ENSMUSG00000034203, ENSMUSG00000021079, ENSMUSG00000022013, ENSMUSG00000024357	1800	78	22680	1.93846	1	0.199622	46.3687
UP_KEYWORDS	Tricarboxylic acid cycle	6	0.323974	0.0436697	ENSMUSG00000021748, ENSMUSG00000026526, ENSMUSG00000000171, ENSMUSG00000020321, ENSMUSG00000025950, ENSMUSG00000027406	1800	25	22680	3.024	1	0.198831	46.6159
COG_ONTOLOGY	Nucleotide transport and metabolism	4	0.215983	0.0441105	ENSMUSG00000026260, ENSMUSG00000002550, ENSMUSG00000089917, ENSMUSG00000026558	147	12	2126	4.82086	0.79381	0.79381	32.9408
SMART	SM00404:PTPc_motif	10	0.539957	0.044266	ENSMUSG00000033295, ENSMUSG00000030854, ENSMUSG00000055322, ENSMUSG00000028771, ENSMUSG00000024539, ENSMUSG00000038042, ENSMUSG00000020422, ENSMUSG00000028399, ENSMUSG00000028909, ENSMUSG00000039431	783	63	10425	2.11336	1	0.699202	46.7966
INTERPRO	IPR017937:Thioredoxin, conserved site	5	0.269978	0.0445023	ENSMUSG00000024583, ENSMUSG00000028367, ENSMUSG00000005354, ENSMUSG00000025823, ENSMUSG00000025130	1681	17	20594	3.60325	1	0.940467	54.9598
GOTERM_MF_DIRECT	GO:0050662~coenzyme binding	4	0.215983	0.0446039	ENSMUSG00000022223, ENSMUSG00000021670, ENSMUSG00000032047, ENSMUSG00000032126	1457	10	17446	4.78957	1	0.671817	52.6691
GOTERM_MF_DIRECT	GO:0051920~peroxiredoxin activity	4	0.215983	0.0446039	ENSMUSG00000028964, ENSMUSG00000024953, ENSMUSG00000024997, ENSMUSG00000026701	1457	10	17446	4.78957	1	0.671817	52.6691
GOTERM_BP_DIRECT	GO:0009060~aerobic respiration	8	0.431965	0.044818	ENSMUSG00000030785, ENSMUSG00000021520, ENSMUSG00000037916, ENSMUSG00000045438, ENSMUSG00000059534, ENSMUSG00000025486, ENSMUSG00000090247, ENSMUSG00000027187	1545	39	18082	2.40073	1	0.855524	57.5181
GOTERM_MF_DIRECT	GO:0005216~ion channel activity	22	1.1879	0.0450411	ENSMUSG00000035805, ENSMUSG00000016346, ENSMUSG00000047976, ENSMUSG00000004319, ENSMUSG00000038077, ENSMUSG00000055078, ENSMUSG00000009687, ENSMUSG00000010803, ENSMUSG00000020428, ENSMUSG00000000560, ENSMUSG00000022843, ENSMUSG00000064329, ENSMUSG00000027950, ENSMUSG00000027895, ENSMUSG00000020704, ENSMUSG00000026959, ENSMUSG00000036570, ENSMUSG00000029211, ENSMUSG00000027716, ENSMUSG00000057092,…	1457	170	17446	1.54957	1	0.668876	53.0228
UP_SEQ_FEATURE	calcium-binding region:1	19	1.02592	0.046075	ENSMUSG00000027347, ENSMUSG00000024397, ENSMUSG00000009075, ENSMUSG00000030824, ENSMUSG00000019370, ENSMUSG00000029544, ENSMUSG00000037493, ENSMUSG00000005716, ENSMUSG00000036438, ENSMUSG00000029161, ENSMUSG00000003657, ENSMUSG00000054459, ENSMUSG00000029088, ENSMUSG00000053519, ENSMUSG00000021576, ENSMUSG00000015143, ENSMUSG00000028785, ENSMUSG00000040536, ENSMUSG00000040659	1687	126	18012	1.61001	1	0.999957	57.7471
INTERPRO	IPR018000:Neurotransmitter-gated ion-channel, conserved site	8	0.431965	0.0461341	ENSMUSG00000020436, ENSMUSG00000027950, ENSMUSG00000055078, ENSMUSG00000010803, ENSMUSG00000029211, ENSMUSG00000020428, ENSMUSG00000000560, ENSMUSG00000029054	1681	41	20594	2.39045	1	0.942277	56.2887
GOTERM_CC_DIRECT	GO:0005856~cytoskeleton	112	6.04752	0.0462751	ENSMUSG00000022451, ENSMUSG00000024969, ENSMUSG00000021071, ENSMUSG00000036533, ENSMUSG00000006717, ENSMUSG00000032504, ENSMUSG00000041263, ENSMUSG00000028441, ENSMUSG00000058672, ENSMUSG00000041775, ENSMUSG00000026430, ENSMUSG00000031971, ENSMUSG00000053693, ENSMUSG00000030064, ENSMUSG00000032589, ENSMUSG00000035439, ENSMUSG00000029600, ENSMUSG00000034616, ENSMUSG00000031516, ENSMUSG00000051786,…	1677	1113	19662	1.17982	1	0.344372	51.6375
GOTERM_MF_DIRECT	GO:0016787~hydrolase activity	147	7.93737	0.0463295	ENSMUSG00000034570, ENSMUSG00000061666, ENSMUSG00000006906, ENSMUSG00000020475, ENSMUSG00000006717, ENSMUSG00000039033, ENSMUSG00000020076, ENSMUSG00000020079, ENSMUSG00000028909, ENSMUSG00000024824, ENSMUSG00000029715, ENSMUSG00000020262, ENSMUSG00000032040, ENSMUSG00000022789, ENSMUSG00000006800, ENSMUSG00000002844, ENSMUSG00000025486, ENSMUSG00000038042, ENSMUSG00000049225, ENSMUSG00000034187,…	1457	1533	17446	1.14818	1	0.672963	54.0511
GOTERM_BP_DIRECT	GO:0006470~protein dephosphorylation	19	1.02592	0.0464561	ENSMUSG00000033295, ENSMUSG00000030854, ENSMUSG00000044573, ENSMUSG00000034616, ENSMUSG00000093803, ENSMUSG00000018648, ENSMUSG00000024668, ENSMUSG00000028909, ENSMUSG00000030002, ENSMUSG00000036504, ENSMUSG00000028771, ENSMUSG00000024539, ENSMUSG00000046442, ENSMUSG00000021816, ENSMUSG00000042662, ENSMUSG00000038042, ENSMUSG00000062127, ENSMUSG00000049225, ENSMUSG00000028399	1545	138	18082	1.61136	1	0.862892	58.8579
KEGG_PATHWAY	mmu04144:Endocytosis	31	1.67387	0.046463	ENSMUSG00000006906, ENSMUSG00000020375, ENSMUSG00000003200, ENSMUSG00000032504, ENSMUSG00000026860, ENSMUSG00000047547, ENSMUSG00000019173, ENSMUSG00000055371, ENSMUSG00000033916, ENSMUSG00000091971, ENSMUSG00000056185, ENSMUSG00000040797, ENSMUSG00000026825, ENSMUSG00000042249, ENSMUSG00000024867, ENSMUSG00000000743, ENSMUSG00000001036, ENSMUSG00000056515, ENSMUSG00000038780, ENSMUSG00000037126,…	646	261	7691	1.41407	0.999998	0.267665	46.5985
COG_ONTOLOGY	Signal transduction mechanisms / Cytoskeleton / Cell division and chromosome partitioning / General function prediction only	8	0.431965	0.0468622	ENSMUSG00000034868, ENSMUSG00000037493, ENSMUSG00000054459, ENSMUSG00000029088, ENSMUSG00000053519, ENSMUSG00000028785, ENSMUSG00000024048, ENSMUSG00000019539	147	49	2126	2.36124	0.813599	0.568258	34.6314
KEGG_PATHWAY	mmu04010:MAPK signaling pathway	30	1.61987	0.0469477	ENSMUSG00000052684, ENSMUSG00000030854, ENSMUSG00000027347, ENSMUSG00000021708, ENSMUSG00000066839, ENSMUSG00000059436, ENSMUSG00000053137, ENSMUSG00000022523, ENSMUSG00000029454, ENSMUSG00000095845, ENSMUSG00000042826, ENSMUSG00000001847, ENSMUSG00000002413, ENSMUSG00000091971, ENSMUSG00000017412, ENSMUSG00000025551, ENSMUSG00000020882, ENSMUSG00000001034, ENSMUSG00000025856, ENSMUSG00000030203,…	646	251	7691	1.42298	0.999998	0.264735	46.9554
GOTERM_CC_DIRECT	GO:0005890~sodium:potassium-exchanging ATPase complex	4	0.215983	0.0470733	ENSMUSG00000026576, ENSMUSG00000040907, ENSMUSG00000036570, ENSMUSG00000041329	1677	10	19662	4.6898	1	0.346131	52.2543
GOTERM_CC_DIRECT	GO:0097470~ribbon synapse	4	0.215983	0.0470733	ENSMUSG00000022469, ENSMUSG00000051790, ENSMUSG00000041488, ENSMUSG00000032589	1677	10	19662	4.6898	1	0.346131	52.2543
KEGG_PATHWAY	mmu00020:Citrate cycle (TCA cycle)	7	0.37797	0.0470735	ENSMUSG00000021748, ENSMUSG00000026526, ENSMUSG00000000171, ENSMUSG00000020321, ENSMUSG00000025950, ENSMUSG00000020917, ENSMUSG00000027406	646	32	7691	2.60434	0.999998	0.260188	47.0476
GOTERM_BP_DIRECT	GO:0033210~leptin-mediated signaling pathway	4	0.215983	0.0472774	ENSMUSG00000031755, ENSMUSG00000025235, ENSMUSG00000004040, ENSMUSG00000027274	1545	10	18082	4.68142	1	0.865064	59.5145
GOTERM_BP_DIRECT	GO:0071404~cellular response to low-density lipoprotein particle stimulus	4	0.215983	0.0472774	ENSMUSG00000051980, ENSMUSG00000024413, ENSMUSG00000030342, ENSMUSG00000058715	1545	10	18082	4.68142	1	0.865064	59.5145
GOTERM_BP_DIRECT	GO:0044321~response to leptin	4	0.215983	0.0472774	ENSMUSG00000031755, ENSMUSG00000025235, ENSMUSG00000004040, ENSMUSG00000027274	1545	10	18082	4.68142	1	0.865064	59.5145
SMART	SM00264:BAG	3	0.161987	0.048252	ENSMUSG00000049792, ENSMUSG00000028416, ENSMUSG00000037316	783	5	10425	7.98851	1	0.707764	49.8071
GOTERM_BP_DIRECT	GO:0033138~positive regulation of peptidyl-serine phosphorylation	12	0.647948	0.0487221	ENSMUSG00000025889, ENSMUSG00000028556, ENSMUSG00000028964, ENSMUSG00000027944, ENSMUSG00000026463, ENSMUSG00000028367, ENSMUSG00000028756, ENSMUSG00000022469, ENSMUSG00000061175, ENSMUSG00000031980, ENSMUSG00000002413, ENSMUSG00000037316	1545	74	18082	1.89787	1	0.87068	60.6455
GOTERM_BP_DIRECT	GO:0017158~regulation of calcium ion-dependent exocytosis	6	0.323974	0.0488473	ENSMUSG00000035864, ENSMUSG00000024261, ENSMUSG00000020848, ENSMUSG00000058420, ENSMUSG00000029608, ENSMUSG00000004961	1545	24	18082	2.92589	1	0.868788	60.7421
GOTERM_BP_DIRECT	GO:0048714~positive regulation of oligodendrocyte differentiation	6	0.323974	0.0488473	ENSMUSG00000044519, ENSMUSG00000027434, ENSMUSG00000039952, ENSMUSG00000022425, ENSMUSG00000065485, ENSMUSG00000028945	1545	24	18082	2.92589	1	0.868788	60.7421
SMART	SM00969:SM00969	7	0.37797	0.049284	ENSMUSG00000048175, ENSMUSG00000025170, ENSMUSG00000020027, ENSMUSG00000039911, ENSMUSG00000039483, ENSMUSG00000056153, ENSMUSG00000053113	783	36	10425	2.58887	1	0.693711	50.5604
KEGG_PATHWAY	mmu04725:Cholinergic synapse	16	0.863931	0.0496711	ENSMUSG00000016346, ENSMUSG00000027669, ENSMUSG00000038648, ENSMUSG00000004936, ENSMUSG00000095845, ENSMUSG00000005034, ENSMUSG00000032562, ENSMUSG00000043004, ENSMUSG00000021536, ENSMUSG00000027950, ENSMUSG00000022994, ENSMUSG00000021820, ENSMUSG00000044216, ENSMUSG00000071658, ENSMUSG00000025499, ENSMUSG00000057897	646	113	7691	1.68574	0.999999	0.267538	48.9196
UP_SEQ_FEATURE	lipid moiety-binding region:S-geranylgeranyl cysteine	17	0.917927	0.0502241	ENSMUSG00000056515, ENSMUSG00000029449, ENSMUSG00000021062, ENSMUSG00000022159, ENSMUSG00000054855, ENSMUSG00000047842, ENSMUSG00000001847, ENSMUSG00000019173, ENSMUSG00000043004, ENSMUSG00000021700, ENSMUSG00000034789, ENSMUSG00000079657, ENSMUSG00000025170, ENSMUSG00000071658, ENSMUSG00000000711, ENSMUSG00000020132, ENSMUSG00000030055	1687	110	18012	1.65007	1	0.999968	60.9805
UP_SEQ_FEATURE	lipid moiety-binding region:N-myristoyl glycine	17	0.917927	0.0502241	ENSMUSG00000022722, ENSMUSG00000027636, ENSMUSG00000005034, ENSMUSG00000036306, ENSMUSG00000032562, ENSMUSG00000039166, ENSMUSG00000045763, ENSMUSG00000002489, ENSMUSG00000029544, ENSMUSG00000025035, ENSMUSG00000051853, ENSMUSG00000021263, ENSMUSG00000054459, ENSMUSG00000049866, ENSMUSG00000028785, ENSMUSG00000032589, ENSMUSG00000030350	1687	110	18012	1.65007	1	0.999968	60.9805
GOTERM_MF_DIRECT	GO:0031625~ubiquitin protein ligase binding	33	1.78186	0.0503425	ENSMUSG00000049792, ENSMUSG00000039703, ENSMUSG00000029050, ENSMUSG00000038965, ENSMUSG00000029276, ENSMUSG00000060579, ENSMUSG00000039615, ENSMUSG00000003814, ENSMUSG00000031878, ENSMUSG00000091971, ENSMUSG00000022105, ENSMUSG00000022789, ENSMUSG00000022365, ENSMUSG00000007682, ENSMUSG00000024039, ENSMUSG00000037316, ENSMUSG00000022285, ENSMUSG00000029167, ENSMUSG00000021025, ENSMUSG00000001270,…	1457	284	17446	1.39134	1	0.697615	57.1202
GOTERM_CC_DIRECT	GO:0044291~cell-cell contact zone	5	0.269978	0.0510186	ENSMUSG00000002489, ENSMUSG00000022568, ENSMUSG00000055421, ENSMUSG00000031990, ENSMUSG00000022656	1677	17	19662	3.44838	1	0.366397	55.1969
GOTERM_MF_DIRECT	GO:0005230~extracellular ligand-gated ion channel activity	8	0.431965	0.0510932	ENSMUSG00000020436, ENSMUSG00000027950, ENSMUSG00000055078, ENSMUSG00000010803, ENSMUSG00000029211, ENSMUSG00000020428, ENSMUSG00000000560, ENSMUSG00000029054	1457	41	17446	2.33637	1	0.696927	57.6724
GOTERM_BP_DIRECT	GO:0045956~positive regulation of calcium ion-dependent exocytosis	5	0.269978	0.0512866	ENSMUSG00000054423, ENSMUSG00000035864, ENSMUSG00000040722, ENSMUSG00000020848, ENSMUSG00000026797	1545	17	18082	3.44222	1	0.879312	62.5799
GOTERM_BP_DIRECT	GO:0072657~protein localization to membrane	5	0.269978	0.0512866	ENSMUSG00000002489, ENSMUSG00000030806, ENSMUSG00000037852, ENSMUSG00000030720, ENSMUSG00000037712	1545	17	18082	3.44222	1	0.879312	62.5799
GOTERM_BP_DIRECT	GO:0008299~isoprenoid biosynthetic process	5	0.269978	0.0512866	ENSMUSG00000059743, ENSMUSG00000021273, ENSMUSG00000029319, ENSMUSG00000021670, ENSMUSG00000006517	1545	17	18082	3.44222	1	0.879312	62.5799
INTERPRO	IPR006029:Neurotransmitter-gated ion-channel transmembrane domain	8	0.431965	0.0516219	ENSMUSG00000020436, ENSMUSG00000027950, ENSMUSG00000055078, ENSMUSG00000010803, ENSMUSG00000029211, ENSMUSG00000020428, ENSMUSG00000000560, ENSMUSG00000029054	1681	42	20594	2.33353	1	0.955865	60.4916
INTERPRO	IPR006202:Neurotransmitter-gated ion-channel ligand-binding	8	0.431965	0.0516219	ENSMUSG00000020436, ENSMUSG00000027950, ENSMUSG00000055078, ENSMUSG00000010803, ENSMUSG00000029211, ENSMUSG00000020428, ENSMUSG00000000560, ENSMUSG00000029054	1681	42	20594	2.33353	1	0.955865	60.4916
INTERPRO	IPR006201:Neurotransmitter-gated ion-channel	8	0.431965	0.0516219	ENSMUSG00000020436, ENSMUSG00000027950, ENSMUSG00000055078, ENSMUSG00000010803, ENSMUSG00000029211, ENSMUSG00000020428, ENSMUSG00000000560, ENSMUSG00000029054	1681	42	20594	2.33353	1	0.955865	60.4916
UP_KEYWORDS	Flavoprotein	17	0.917927	0.0522411	ENSMUSG00000037916, ENSMUSG00000032314, ENSMUSG00000003526, ENSMUSG00000026003, ENSMUSG00000026260, ENSMUSG00000025155, ENSMUSG00000062729, ENSMUSG00000018659, ENSMUSG00000040181, ENSMUSG00000000399, ENSMUSG00000029998, ENSMUSG00000036327, ENSMUSG00000029545, ENSMUSG00000018574, ENSMUSG00000039048, ENSMUSG00000006471, ENSMUSG00000033684	1800	130	22680	1.64769	1	0.231477	52.962
GOTERM_BP_DIRECT	GO:0007612~learning	11	0.593952	0.0524326	ENSMUSG00000052684, ENSMUSG00000042453, ENSMUSG00000000214, ENSMUSG00000027950, ENSMUSG00000037685, ENSMUSG00000026959, ENSMUSG00000063239, ENSMUSG00000028546, ENSMUSG00000039059, ENSMUSG00000027792, ENSMUSG00000022208	1545	66	18082	1.95059	1	0.882638	63.4148
UP_SEQ_FEATURE	calcium-binding region:3	8	0.431965	0.0530122	ENSMUSG00000029544, ENSMUSG00000036438, ENSMUSG00000003657, ENSMUSG00000054459, ENSMUSG00000029088, ENSMUSG00000028785, ENSMUSG00000021576, ENSMUSG00000019370	1687	37	18012	2.30853	1	0.999967	63.0202
GOTERM_BP_DIRECT	GO:0098609~cell-cell adhesion	24	1.2959	0.0533445	ENSMUSG00000030533, ENSMUSG00000074513, ENSMUSG00000022568, ENSMUSG00000022451, ENSMUSG00000024969, ENSMUSG00000032637, ENSMUSG00000024862, ENSMUSG00000003200, ENSMUSG00000026860, ENSMUSG00000041720, ENSMUSG00000091971, ENSMUSG00000017670, ENSMUSG00000016664, ENSMUSG00000027108, ENSMUSG00000021196, ENSMUSG00000028433, ENSMUSG00000034088, ENSMUSG00000025950, ENSMUSG00000030695, ENSMUSG00000040659,…	1545	189	18082	1.48617	1	0.8847	64.0666
UP_KEYWORDS	Phosphopantetheine	3	0.161987	0.0534993	ENSMUSG00000020256, ENSMUSG00000025153, ENSMUSG00000030869	1800	5	22680	7.56	1	0.234099	53.8322
INTERPRO	IPR004014:Cation-transporting P-type ATPase, N-terminal	5	0.269978	0.0536427	ENSMUSG00000030302, ENSMUSG00000040907, ENSMUSG00000038094, ENSMUSG00000032570, ENSMUSG00000026463	1681	18	20594	3.40307	1	0.957866	61.9409
INTERPRO	IPR015898:G-protein gamma-like domain	5	0.269978	0.0536427	ENSMUSG00000020599, ENSMUSG00000071658, ENSMUSG00000095845, ENSMUSG00000043004, ENSMUSG00000026527	1681	18	20594	3.40307	1	0.957866	61.9409
KEGG_PATHWAY	mmu04540:Gap junction	13	0.701944	0.0542019	ENSMUSG00000028005, ENSMUSG00000022994, ENSMUSG00000072235, ENSMUSG00000033910, ENSMUSG00000058672, ENSMUSG00000001034, ENSMUSG00000004936, ENSMUSG00000026202, ENSMUSG00000025499, ENSMUSG00000025856, ENSMUSG00000005034, ENSMUSG00000032562, ENSMUSG00000021536	646	86	7691	1.79968	1	0.283334	52.039
INTERPRO	IPR007632:Anoctamin/TMEM 16	4	0.215983	0.0544492	ENSMUSG00000074968, ENSMUSG00000035189, ENSMUSG00000037949, ENSMUSG00000034863	1681	11	20594	4.45492	1	0.956687	62.5052
INTERPRO	IPR000331:Rap GTPase activating proteins domain	4	0.215983	0.0544492	ENSMUSG00000038860, ENSMUSG00000030583, ENSMUSG00000002496, ENSMUSG00000038807	1681	11	20594	4.45492	1	0.956687	62.5052
KEGG_PATHWAY	mmu04970:Salivary secretion	12	0.647948	0.0552195	ENSMUSG00000026576, ENSMUSG00000030302, ENSMUSG00000028005, ENSMUSG00000022994, ENSMUSG00000040907, ENSMUSG00000036438, ENSMUSG00000033910, ENSMUSG00000026463, ENSMUSG00000041329, ENSMUSG00000005034, ENSMUSG00000019370, ENSMUSG00000021536	646	77	7691	1.85541	1	0.282768	52.715
SMART	SM00164:TBC	7	0.37797	0.0552516	ENSMUSG00000052302, ENSMUSG00000023923, ENSMUSG00000038520, ENSMUSG00000003134, ENSMUSG00000042216, ENSMUSG00000042492, ENSMUSG00000039976	783	37	10425	2.5189	1	0.715414	54.7144
GOTERM_BP_DIRECT	GO:0016567~protein ubiquitination	41	2.21382	0.0556166	ENSMUSG00000036352, ENSMUSG00000005371, ENSMUSG00000038965, ENSMUSG00000040462, ENSMUSG00000055707, ENSMUSG00000032507, ENSMUSG00000039483, ENSMUSG00000039615, ENSMUSG00000045210, ENSMUSG00000029312, ENSMUSG00000019295, ENSMUSG00000041528, ENSMUSG00000055839, ENSMUSG00000070923, ENSMUSG00000025170, ENSMUSG00000020027, ENSMUSG00000052981, ENSMUSG00000037622, ENSMUSG00000053113, ENSMUSG00000001366,…	1545	362	18082	1.32554	1	0.892884	65.6431
UP_KEYWORDS	NAD	22	1.1879	0.0557567	ENSMUSG00000059734, ENSMUSG00000024099, ENSMUSG00000025968, ENSMUSG00000037916, ENSMUSG00000032018, ENSMUSG00000031529, ENSMUSG00000025138, ENSMUSG00000020321, ENSMUSG00000026675, ENSMUSG00000024556, ENSMUSG00000030905, ENSMUSG00000053398, ENSMUSG00000025745, ENSMUSG00000025153, ENSMUSG00000037373, ENSMUSG00000028070, ENSMUSG00000027893, ENSMUSG00000025486, ENSMUSG00000003500, ENSMUSG00000031604,…	1800	183	22680	1.51475	1	0.240521	55.3561
UP_SEQ_FEATURE	domain:BAR	5	0.269978	0.0558781	ENSMUSG00000030766, ENSMUSG00000037062, ENSMUSG00000033389, ENSMUSG00000003200, ENSMUSG00000026860	1687	16	18012	3.33654	1	0.999967	65.0116
GOTERM_CC_DIRECT	GO:0019898~extrinsic component of membrane	13	0.701944	0.0563012	ENSMUSG00000034570, ENSMUSG00000025089, ENSMUSG00000020876, ENSMUSG00000052397, ENSMUSG00000025173, ENSMUSG00000016664, ENSMUSG00000029560, ENSMUSG00000056185, ENSMUSG00000026088, ENSMUSG00000029608, ENSMUSG00000032589, ENSMUSG00000020220, ENSMUSG00000032733	1677	85	19662	1.79316	1	0.393159	58.872
INTERPRO	IPR019558:Mammalian uncoordinated homology 13, subgroup, domain 2	3	0.161987	0.0563199	ENSMUSG00000034799, ENSMUSG00000062151, ENSMUSG00000047507	1681	5	20594	7.35062	1	0.958196	63.7839
INTERPRO	IPR002379:V-ATPase proteolipid subunit C-like domain	3	0.161987	0.0563199	ENSMUSG00000062683, ENSMUSG00000018770, ENSMUSG00000006057	1681	5	20594	7.35062	1	0.958196	63.7839
INTERPRO	IPR019808:Histidine triad, conserved site	3	0.161987	0.0563199	ENSMUSG00000032040, ENSMUSG00000060579, ENSMUSG00000028470	1681	5	20594	7.35062	1	0.958196	63.7839
INTERPRO	IPR014772:Mammalian uncoordinated homology 13, domain 2	3	0.161987	0.0563199	ENSMUSG00000034799, ENSMUSG00000062151, ENSMUSG00000047507	1681	5	20594	7.35062	1	0.958196	63.7839
INTERPRO	IPR009081:Acyl carrier protein-like	3	0.161987	0.0563199	ENSMUSG00000020256, ENSMUSG00000025153, ENSMUSG00000030869	1681	5	20594	7.35062	1	0.958196	63.7839
INTERPRO	IPR003103:BAG domain	3	0.161987	0.0563199	ENSMUSG00000049792, ENSMUSG00000028416, ENSMUSG00000037316	1681	5	20594	7.35062	1	0.958196	63.7839
INTERPRO	IPR005746:Thioredoxin	3	0.161987	0.0563199	ENSMUSG00000024583, ENSMUSG00000028367, ENSMUSG00000005354	1681	5	20594	7.35062	1	0.958196	63.7839
GOTERM_CC_DIRECT	GO:0043195~terminal bouton	16	0.863931	0.0566385	ENSMUSG00000034891, ENSMUSG00000034799, ENSMUSG00000063239, ENSMUSG00000032532, ENSMUSG00000062151, ENSMUSG00000026797, ENSMUSG00000025889, ENSMUSG00000000214, ENSMUSG00000005716, ENSMUSG00000033615, ENSMUSG00000003657, ENSMUSG00000026959, ENSMUSG00000035864, ENSMUSG00000033419, ENSMUSG00000053025, ENSMUSG00000068923	1677	113	19662	1.66011	1	0.391748	59.0968
SMART	SM00228:PDZ	18	0.971922	0.0568779	ENSMUSG00000022568, ENSMUSG00000021493, ENSMUSG00000041670, ENSMUSG00000003872, ENSMUSG00000020388, ENSMUSG00000039621, ENSMUSG00000090935, ENSMUSG00000001741, ENSMUSG00000027488, ENSMUSG00000052373, ENSMUSG00000024812, ENSMUSG00000002489, ENSMUSG00000029674, ENSMUSG00000030583, ENSMUSG00000030887, ENSMUSG00000024227, ENSMUSG00000053693, ENSMUSG00000039137	783	150	10425	1.5977	1	0.706732	55.789
GOTERM_BP_DIRECT	GO:0003382~epithelial cell morphogenesis	6	0.323974	0.0569291	ENSMUSG00000022568, ENSMUSG00000048251, ENSMUSG00000030583, ENSMUSG00000029392, ENSMUSG00000048826, ENSMUSG00000001847	1545	25	18082	2.80885	1	0.896371	66.5237
GOTERM_MF_DIRECT	GO:0019894~kinesin binding	8	0.431965	0.0570838	ENSMUSG00000036955, ENSMUSG00000025889, ENSMUSG00000028917, ENSMUSG00000024862, ENSMUSG00000001440, ENSMUSG00000025920, ENSMUSG00000022340, ENSMUSG00000024163	1457	42	17446	2.28075	1	0.731698	61.8465
INTERPRO	IPR000608:Ubiquitin-conjugating enzyme, E2	8	0.431965	0.0575032	ENSMUSG00000020390, ENSMUSG00000005575, ENSMUSG00000038965, ENSMUSG00000021774, ENSMUSG00000022674, ENSMUSG00000078923, ENSMUSG00000015120, ENSMUSG00000052981	1681	43	20594	2.27926	1	0.957987	64.5714
GOTERM_MF_DIRECT	GO:0034450~ubiquitin-ubiquitin ligase activity	4	0.215983	0.0576219	ENSMUSG00000039615, ENSMUSG00000059890, ENSMUSG00000022771, ENSMUSG00000031751	1457	11	17446	4.35415	1	0.729273	62.2019
GOTERM_MF_DIRECT	GO:0031406~carboxylic acid binding	4	0.215983	0.0576219	ENSMUSG00000028961, ENSMUSG00000031672, ENSMUSG00000025190, ENSMUSG00000032126	1457	11	17446	4.35415	1	0.729273	62.2019
GOTERM_MF_DIRECT	GO:0004526~ribonuclease P activity	4	0.215983	0.0576219	ENSMUSG00000021418, ENSMUSG00000029715, ENSMUSG00000024446, ENSMUSG00000049950	1457	11	17446	4.35415	1	0.729273	62.2019
GOTERM_BP_DIRECT	GO:0015991~ATP hydrolysis coupled proton transport	7	0.37797	0.057887	ENSMUSG00000062683, ENSMUSG00000040907, ENSMUSG00000019210, ENSMUSG00000078958, ENSMUSG00000001750, ENSMUSG00000018770, ENSMUSG00000006057	1545	33	18082	2.48257	1	0.898235	67.1529
GOTERM_BP_DIRECT	GO:0008285~negative regulation of cell proliferation	43	2.32181	0.0580353	ENSMUSG00000052684, ENSMUSG00000033295, ENSMUSG00000029610, ENSMUSG00000029050, ENSMUSG00000093803, ENSMUSG00000029276, ENSMUSG00000021743, ENSMUSG00000028179, ENSMUSG00000022508, ENSMUSG00000020415, ENSMUSG00000028207, ENSMUSG00000031660, ENSMUSG00000031523, ENSMUSG00000028909, ENSMUSG00000091971, ENSMUSG00000020262, ENSMUSG00000022105, ENSMUSG00000040055, ENSMUSG00000026430, ENSMUSG00000032737,…	1545	384	18082	1.31055	1	0.896718	67.2493
SMART	SM00547:ZnF_RBZ	5	0.269978	0.0580588	ENSMUSG00000039703, ENSMUSG00000022634, ENSMUSG00000072872, ENSMUSG00000027466, ENSMUSG00000022552	783	20	10425	3.32854	1	0.69586	56.5543
GOTERM_CC_DIRECT	GO:0015629~actin cytoskeleton	25	1.34989	0.0581092	ENSMUSG00000004530, ENSMUSG00000022451, ENSMUSG00000036533, ENSMUSG00000008136, ENSMUSG00000020846, ENSMUSG00000025085, ENSMUSG00000027944, ENSMUSG00000034675, ENSMUSG00000000416, ENSMUSG00000036026, ENSMUSG00000062127, ENSMUSG00000038456, ENSMUSG00000054733, ENSMUSG00000052593, ENSMUSG00000021493, ENSMUSG00000078484, ENSMUSG00000052397, ENSMUSG00000030707, ENSMUSG00000075284, ENSMUSG00000025889,…	1677	201	19662	1.45827	1	0.396518	60.0637
INTERPRO	IPR023395:Mitochondrial carrier domain	9	0.485961	0.0583981	ENSMUSG00000019082, ENSMUSG00000018677, ENSMUSG00000061904, ENSMUSG00000024012, ENSMUSG00000045973, ENSMUSG00000031633, ENSMUSG00000014606, ENSMUSG00000028982, ENSMUSG00000020744	1681	52	20594	2.12037	1	0.957107	65.1562
INTERPRO	IPR018108:Mitochondrial substrate/solute carrier	9	0.485961	0.0583981	ENSMUSG00000019082, ENSMUSG00000018677, ENSMUSG00000061904, ENSMUSG00000024012, ENSMUSG00000045973, ENSMUSG00000031633, ENSMUSG00000014606, ENSMUSG00000028982, ENSMUSG00000020744	1681	52	20594	2.12037	1	0.957107	65.1562
GOTERM_MF_DIRECT	GO:0022851~GABA-gated chloride ion channel activity	3	0.161987	0.0587127	ENSMUSG00000010803, ENSMUSG00000020428, ENSMUSG00000000560	1457	5	17446	7.18435	1	0.730357	62.9127
GOTERM_MF_DIRECT	GO:0030971~receptor tyrosine kinase binding	9	0.485961	0.0591385	ENSMUSG00000002489, ENSMUSG00000033295, ENSMUSG00000017670, ENSMUSG00000061374, ENSMUSG00000051391, ENSMUSG00000024539, ENSMUSG00000027712, ENSMUSG00000032475, ENSMUSG00000035109	1457	51	17446	2.11304	1	0.727331	63.1868
GOTERM_MF_DIRECT	GO:0004725~protein tyrosine phosphatase activity	14	0.75594	0.0594929	ENSMUSG00000033295, ENSMUSG00000030854, ENSMUSG00000044573, ENSMUSG00000030203, ENSMUSG00000034616, ENSMUSG00000018648, ENSMUSG00000028909, ENSMUSG00000030002, ENSMUSG00000028771, ENSMUSG00000024539, ENSMUSG00000042662, ENSMUSG00000038042, ENSMUSG00000028399, ENSMUSG00000039431	1457	97	17446	1.72819	1	0.723929	63.4134
GOTERM_CC_DIRECT	GO:0001726~ruffle	14	0.75594	0.0594944	ENSMUSG00000026923, ENSMUSG00000034570, ENSMUSG00000021493, ENSMUSG00000026925, ENSMUSG00000024397, ENSMUSG00000037126, ENSMUSG00000052397, ENSMUSG00000020173, ENSMUSG00000075284, ENSMUSG00000049550, ENSMUSG00000023905, ENSMUSG00000031078, ENSMUSG00000015143, ENSMUSG00000030064	1677	95	19662	1.72782	1	0.400709	60.9547
INTERPRO	IPR023214:HAD-like domain	12	0.647948	0.0596613	ENSMUSG00000022040, ENSMUSG00000030302, ENSMUSG00000040907, ENSMUSG00000038094, ENSMUSG00000032570, ENSMUSG00000037685, ENSMUSG00000022474, ENSMUSG00000026463, ENSMUSG00000020736, ENSMUSG00000027546, ENSMUSG00000029406, ENSMUSG00000040543	1681	80	20594	1.83766	1	0.957118	65.9662
UP_SEQ_FEATURE	domain:SH3	23	1.2419	0.0604469	ENSMUSG00000089661, ENSMUSG00000034471, ENSMUSG00000027378, ENSMUSG00000003200, ENSMUSG00000027636, ENSMUSG00000037062, ENSMUSG00000026860, ENSMUSG00000055371, ENSMUSG00000026259, ENSMUSG00000052373, ENSMUSG00000017400, ENSMUSG00000041225, ENSMUSG00000024812, ENSMUSG00000017412, ENSMUSG00000016664, ENSMUSG00000041263, ENSMUSG00000020882, ENSMUSG00000031078, ENSMUSG00000021285, ENSMUSG00000040390,…	1687	166	18012	1.47934	1	0.999976	67.9781
GOTERM_CC_DIRECT	GO:0034705~potassium channel complex	4	0.215983	0.0607307	ENSMUSG00000047976, ENSMUSG00000038077, ENSMUSG00000028931, ENSMUSG00000053519	1677	11	19662	4.26346	1	0.404015	61.7343
GOTERM_BP_DIRECT	GO:0003014~renal system process	4	0.215983	0.0609878	ENSMUSG00000057672, ENSMUSG00000039737, ENSMUSG00000021190, ENSMUSG00000031980	1545	11	18082	4.25584	1	0.90633	69.1137
GOTERM_BP_DIRECT	GO:0021707~cerebellar granule cell differentiation	4	0.215983	0.0609878	ENSMUSG00000001911, ENSMUSG00000030302, ENSMUSG00000030093, ENSMUSG00000031654	1545	11	18082	4.25584	1	0.90633	69.1137
GOTERM_BP_DIRECT	GO:0048708~astrocyte differentiation	4	0.215983	0.0609878	ENSMUSG00000026923, ENSMUSG00000001911, ENSMUSG00000027434, ENSMUSG00000004040	1545	11	18082	4.25584	1	0.90633	69.1137
GOTERM_CC_DIRECT	GO:0005663~DNA replication factor C complex	3	0.161987	0.0610245	ENSMUSG00000033970, ENSMUSG00000022881, ENSMUSG00000029363	1677	5	19662	7.0347	1	0.402357	61.9174
GOTERM_CC_DIRECT	GO:0033177~proton-transporting two-sector ATPase complex, proton-transporting domain	3	0.161987	0.0610245	ENSMUSG00000062683, ENSMUSG00000018770, ENSMUSG00000006057	1677	5	19662	7.0347	1	0.402357	61.9174
GOTERM_BP_DIRECT	GO:1903214~regulation of protein targeting to mitochondrion	3	0.161987	0.0612161	ENSMUSG00000020538, ENSMUSG00000054428, ENSMUSG00000028756	1545	5	18082	7.02214	1	0.905192	69.2536
GOTERM_BP_DIRECT	GO:0044206~UMP salvage	3	0.161987	0.0612161	ENSMUSG00000002550, ENSMUSG00000089917, ENSMUSG00000026558	1545	5	18082	7.02214	1	0.905192	69.2536
GOTERM_BP_DIRECT	GO:0045039~protein import into mitochondrial inner membrane	3	0.161987	0.0612161	ENSMUSG00000048967, ENSMUSG00000020219, ENSMUSG00000036199, ENSMUSG00000021079	1545	5	18082	7.02214	1	0.905192	69.2536
GOTERM_BP_DIRECT	GO:0006662~glycerol ether metabolic process	3	0.161987	0.0612161	ENSMUSG00000024583, ENSMUSG00000028367, ENSMUSG00000005354	1545	5	18082	7.02214	1	0.905192	69.2536
GOTERM_BP_DIRECT	GO:0006532~aspartate biosynthetic process	3	0.161987	0.0612161	ENSMUSG00000030268, ENSMUSG00000031672, ENSMUSG00000025190	1545	5	18082	7.02214	1	0.905192	69.2536
GOTERM_BP_DIRECT	GO:1900273~positive regulation of long-term synaptic potentiation	5	0.269978	0.0616386	ENSMUSG00000042453, ENSMUSG00000030854, ENSMUSG00000061751, ENSMUSG00000053310, ENSMUSG00000039536	1545	18	18082	3.25099	1	0.904792	69.5109
GOTERM_BP_DIRECT	GO:0051000~positive regulation of nitric-oxide synthase activity	5	0.269978	0.0616386	ENSMUSG00000037936, ENSMUSG00000036438, ENSMUSG00000019370, ENSMUSG00000031921, ENSMUSG00000059456	1545	18	18082	3.25099	1	0.904792	69.5109
GOTERM_BP_DIRECT	GO:0006103~2-oxoglutarate metabolic process	5	0.269978	0.0616386	ENSMUSG00000025950, ENSMUSG00000031672, ENSMUSG00000025190, ENSMUSG00000061474, ENSMUSG00000027406	1545	18	18082	3.25099	1	0.904792	69.5109
GOTERM_MF_DIRECT	GO:0098641~cadherin binding involved in cell-cell adhesion	32	1.72786	0.0620395	ENSMUSG00000074513, ENSMUSG00000022568, ENSMUSG00000022451, ENSMUSG00000024969, ENSMUSG00000028964, ENSMUSG00000024862, ENSMUSG00000003200, ENSMUSG00000041720, ENSMUSG00000026860, ENSMUSG00000034101, ENSMUSG00000091971, ENSMUSG00000016664, ENSMUSG00000034675, ENSMUSG00000034088, ENSMUSG00000040659, ENSMUSG00000036686, ENSMUSG00000001036, ENSMUSG00000022285, ENSMUSG00000030533, ENSMUSG00000032637,…	1457	279	17446	1.37335	1	0.73375	65.0041
UP_KEYWORDS	Palmitate	33	1.78186	0.0621111	ENSMUSG00000020841, ENSMUSG00000028964, ENSMUSG00000002459, ENSMUSG00000032562, ENSMUSG00000045777, ENSMUSG00000001844, ENSMUSG00000029544, ENSMUSG00000020436, ENSMUSG00000038530, ENSMUSG00000002458, ENSMUSG00000036570, ENSMUSG00000025170, ENSMUSG00000027581, ENSMUSG00000020658, ENSMUSG00000052298, ENSMUSG00000060591, ENSMUSG00000015335, ENSMUSG00000026688, ENSMUSG00000047976, ENSMUSG00000038077,…	1800	304	22680	1.36776	1	0.262174	59.3986
GOTERM_BP_DIRECT	GO:0006887~exocytosis	15	0.809935	0.0627502	ENSMUSG00000053841, ENSMUSG00000039714, ENSMUSG00000054423, ENSMUSG00000034799, ENSMUSG00000041670, ENSMUSG00000017978, ENSMUSG00000024261, ENSMUSG00000040722, ENSMUSG00000003872, ENSMUSG00000062151, ENSMUSG00000058420, ENSMUSG00000026797, ENSMUSG00000033615, ENSMUSG00000035226, ENSMUSG00000041488	1545	105	18082	1.67194	1	0.906938	70.1783
GOTERM_BP_DIRECT	GO:0001662~behavioral fear response	8	0.431965	0.0631109	ENSMUSG00000038255, ENSMUSG00000045573, ENSMUSG00000021684, ENSMUSG00000055078, ENSMUSG00000061751, ENSMUSG00000020883, ENSMUSG00000032532, ENSMUSG00000026385	1545	42	18082	2.22925	1	0.906316	70.3918
GOTERM_BP_DIRECT	GO:0048167~regulation of synaptic plasticity	8	0.431965	0.0631109	ENSMUSG00000020091, ENSMUSG00000030302, ENSMUSG00000039542, ENSMUSG00000026959, ENSMUSG00000051391, ENSMUSG00000025551, ENSMUSG00000036306, ENSMUSG00000022208	1545	42	18082	2.22925	1	0.906316	70.3918
INTERPRO	IPR009038:GOLD	5	0.269978	0.0637178	ENSMUSG00000032180, ENSMUSG00000004394, ENSMUSG00000032353, ENSMUSG00000021248, ENSMUSG00000033184	1681	19	20594	3.22396	1	0.963077	68.449
INTERPRO	IPR004012:RUN	5	0.269978	0.0637178	ENSMUSG00000041263, ENSMUSG00000028917, ENSMUSG00000020375, ENSMUSG00000035629, ENSMUSG00000042216	1681	19	20594	3.22396	1	0.963077	68.449
PIR_SUPERFAMILY	PIRSF015618:basic helix-loop-helix transcription factor NeuroD	3	0.161987	0.0640766	ENSMUSG00000037984, ENSMUSG00000038255, ENSMUSG00000034701	203	4	1807	6.67611	0.999996	0.999996	56.0592
GOTERM_MF_DIRECT	GO:0016740~transferase activity	140	7.5594	0.0641096	ENSMUSG00000024969, ENSMUSG00000020471, ENSMUSG00000023832, ENSMUSG00000053137, ENSMUSG00000027199, ENSMUSG00000027198, ENSMUSG00000001844, ENSMUSG00000023021, ENSMUSG00000050323, ENSMUSG00000002797, ENSMUSG00000003271, ENSMUSG00000021820, ENSMUSG00000030316, ENSMUSG00000053693, ENSMUSG00000042249, ENSMUSG00000052981, ENSMUSG00000032047, ENSMUSG00000018865, ENSMUSG00000020115, ENSMUSG00000007783,…	1457	1472	17446	1.13882	1	0.7403	66.2489
UP_KEYWORDS	Metal-binding	293	15.8207	0.0642165	ENSMUSG00000037916, ENSMUSG00000061666, ENSMUSG00000093803, ENSMUSG00000031781, ENSMUSG00000024261, ENSMUSG00000022508, ENSMUSG00000019370, ENSMUSG00000051234, ENSMUSG00000015961, ENSMUSG00000020262, ENSMUSG00000036438, ENSMUSG00000010086, ENSMUSG00000025486, ENSMUSG00000048385, ENSMUSG00000053693, ENSMUSG00000049225, ENSMUSG00000034187, ENSMUSG00000059734, ENSMUSG00000022635, ENSMUSG00000022634,…	1800	3395	22680	1.08742	1	0.267438	60.6612
INTERPRO	IPR020636:Calcium/calmodulin-dependent/calcium-dependent protein kinase	6	0.323974	0.0642881	ENSMUSG00000016179, ENSMUSG00000039145, ENSMUSG00000021820, ENSMUSG00000029471, ENSMUSG00000025537, ENSMUSG00000057897	1681	27	20594	2.72245	1	0.961615	68.784
GOTERM_BP_DIRECT	GO:0001503~ossification	14	0.75594	0.0643532	ENSMUSG00000046985, ENSMUSG00000051980, ENSMUSG00000021493, ENSMUSG00000048583, ENSMUSG00000040297, ENSMUSG00000030218, ENSMUSG00000018593, ENSMUSG00000027198, ENSMUSG00000027770, ENSMUSG00000014599, ENSMUSG00000022098, ENSMUSG00000027339, ENSMUSG00000026241, ENSMUSG00000029755	1545	96	18082	1.70677	1	0.908845	71.1162
KEGG_PATHWAY	mmu04024:cAMP signaling pathway	24	1.2959	0.0646603	ENSMUSG00000052684, ENSMUSG00000021025, ENSMUSG00000038648, ENSMUSG00000040907, ENSMUSG00000004936, ENSMUSG00000005034, ENSMUSG00000001847, ENSMUSG00000032562, ENSMUSG00000019370, ENSMUSG00000002413, ENSMUSG00000021536, ENSMUSG00000026576, ENSMUSG00000002489, ENSMUSG00000030302, ENSMUSG00000022994, ENSMUSG00000036438, ENSMUSG00000026959, ENSMUSG00000036570, ENSMUSG00000021820, ENSMUSG00000039809,…	646	197	7691	1.45043	1	0.318166	58.5796
GOTERM_CC_DIRECT	GO:0030667~secretory granule membrane	6	0.323974	0.0653446	ENSMUSG00000050732, ENSMUSG00000037852, ENSMUSG00000079657, ENSMUSG00000024261, ENSMUSG00000021248, ENSMUSG00000062995	1677	26	19662	2.70566	1	0.421215	64.517
GOTERM_CC_DIRECT	GO:0031519~PcG protein complex	6	0.323974	0.0653446	ENSMUSG00000040669, ENSMUSG00000024325, ENSMUSG00000089715, ENSMUSG00000072872, ENSMUSG00000046707, ENSMUSG00000029475	1677	26	19662	2.70566	1	0.421215	64.517
GOTERM_BP_DIRECT	GO:0006829~zinc II ion transport	6	0.323974	0.0657302	ENSMUSG00000024270, ENSMUSG00000002105, ENSMUSG00000046822, ENSMUSG00000024327, ENSMUSG00000029151, ENSMUSG00000041654	1545	26	18082	2.70082	1	0.911725	71.8997
UP_KEYWORDS	Hydrolase	148	7.99136	0.0659223	ENSMUSG00000034570, ENSMUSG00000061666, ENSMUSG00000006906, ENSMUSG00000020475, ENSMUSG00000006717, ENSMUSG00000039033, ENSMUSG00000020076, ENSMUSG00000001847, ENSMUSG00000020079, ENSMUSG00000028909, ENSMUSG00000024824, ENSMUSG00000029715, ENSMUSG00000020262, ENSMUSG00000032040, ENSMUSG00000022789, ENSMUSG00000006800, ENSMUSG00000002844, ENSMUSG00000025486, ENSMUSG00000038042, ENSMUSG00000049225,…	1800	1646	22680	1.13293	1	0.271121	61.6573
GOTERM_CC_DIRECT	GO:0005913~cell-cell adherens junction	36	1.94384	0.0660109	ENSMUSG00000074513, ENSMUSG00000064115, ENSMUSG00000022568, ENSMUSG00000022451, ENSMUSG00000024969, ENSMUSG00000028964, ENSMUSG00000024862, ENSMUSG00000003200, ENSMUSG00000041720, ENSMUSG00000026860, ENSMUSG00000034101, ENSMUSG00000091971, ENSMUSG00000016664, ENSMUSG00000022661, ENSMUSG00000034675, ENSMUSG00000034088, ENSMUSG00000040659, ENSMUSG00000036686, ENSMUSG00000001036, ENSMUSG00000022285,…	1677	316	19662	1.3357	1	0.421325	64.9029
COG_ONTOLOGY	Secondary metabolites biosynthesis, transport, and catabolism / General function prediction only	4	0.215983	0.0660202	ENSMUSG00000026675, ENSMUSG00000002332, ENSMUSG00000066441, ENSMUSG00000025153	147	14	2126	4.13217	0.908417	0.549248	45.3914
GOTERM_BP_DIRECT	GO:0006511~ubiquitin-dependent protein catabolic process	20	1.07991	0.0661371	ENSMUSG00000039703, ENSMUSG00000036840, ENSMUSG00000042506, ENSMUSG00000047879, ENSMUSG00000029634, ENSMUSG00000032507, ENSMUSG00000039615, ENSMUSG00000059890, ENSMUSG00000027566, ENSMUSG00000005625, ENSMUSG00000031751, ENSMUSG00000038429, ENSMUSG00000020390, ENSMUSG00000028557, ENSMUSG00000032867, ENSMUSG00000079658, ENSMUSG00000030751, ENSMUSG00000064145, ENSMUSG00000038324, ENSMUSG00000015837	1545	154	18082	1.51994	1	0.91127	72.1273
GOTERM_MF_DIRECT	GO:0016791~phosphatase activity	16	0.863931	0.0663531	ENSMUSG00000033295, ENSMUSG00000022040, ENSMUSG00000030854, ENSMUSG00000044573, ENSMUSG00000030203, ENSMUSG00000034616, ENSMUSG00000020736, ENSMUSG00000018648, ENSMUSG00000028909, ENSMUSG00000030002, ENSMUSG00000028771, ENSMUSG00000024539, ENSMUSG00000042662, ENSMUSG00000038042, ENSMUSG00000028399, ENSMUSG00000039431	1457	118	17446	1.62358	1	0.747467	67.551
UP_KEYWORDS	Fatty acid metabolism	16	0.863931	0.0663549	ENSMUSG00000032281, ENSMUSG00000038633, ENSMUSG00000026003, ENSMUSG00000063275, ENSMUSG00000007783, ENSMUSG00000025745, ENSMUSG00000025153, ENSMUSG00000026853, ENSMUSG00000030869, ENSMUSG00000015090, ENSMUSG00000029545, ENSMUSG00000024665, ENSMUSG00000018574, ENSMUSG00000029059, ENSMUSG00000030168, ENSMUSG00000028944	1800	124	22680	1.62581	1	0.270164	61.9062
GOTERM_MF_DIRECT	GO:0030544~Hsp70 protein binding	7	0.37797	0.0672745	ENSMUSG00000029014, ENSMUSG00000024966, ENSMUSG00000062797, ENSMUSG00000025920, ENSMUSG00000039615, ENSMUSG00000037196, ENSMUSG00000108996, ENSMUSG00000006517	1457	35	17446	2.39478	1	0.747281	68.072
GOTERM_MF_DIRECT	GO:0000062~fatty-acyl-CoA binding	7	0.37797	0.0672745	ENSMUSG00000029545, ENSMUSG00000032314, ENSMUSG00000026003, ENSMUSG00000018574, ENSMUSG00000026600, ENSMUSG00000025745, ENSMUSG00000026385	1457	35	17446	2.39478	1	0.747281	68.072
UP_SEQ_FEATURE	zinc finger region:Phorbol-ester/DAG-type	8	0.431965	0.0674274	ENSMUSG00000021279, ENSMUSG00000017400, ENSMUSG00000027347, ENSMUSG00000034799, ENSMUSG00000026430, ENSMUSG00000021662, ENSMUSG00000062151, ENSMUSG00000056486	1687	39	18012	2.19014	1	0.999988	72.0555
SMART	SM00253:SOCS	5	0.269978	0.0676314	ENSMUSG00000025170, ENSMUSG00000020027, ENSMUSG00000039483, ENSMUSG00000056153, ENSMUSG00000053113	783	21	10425	3.17004	1	0.734776	62.3196
SMART	SM00049:DEP	5	0.269978	0.0676314	ENSMUSG00000020599, ENSMUSG00000041762, ENSMUSG00000022469, ENSMUSG00000039621, ENSMUSG00000026527	783	21	10425	3.17004	1	0.734776	62.3196
UP_SEQ_FEATURE	domain:N-terminal Ras-GEF	5	0.269978	0.0678499	ENSMUSG00000026482, ENSMUSG00000027347, ENSMUSG00000029333, ENSMUSG00000021708, ENSMUSG00000022469	1687	17	18012	3.14028	1	0.999981	72.2858
GOTERM_MF_DIRECT	GO:0003924~GTPase activity	25	1.34989	0.0685078	ENSMUSG00000016349, ENSMUSG00000001847, ENSMUSG00000032562, ENSMUSG00000019173, ENSMUSG00000057455, ENSMUSG00000021700, ENSMUSG00000043004, ENSMUSG00000025035, ENSMUSG00000058672, ENSMUSG00000010086, ENSMUSG00000022789, ENSMUSG00000026202, ENSMUSG00000071658, ENSMUSG00000026825, ENSMUSG00000059811, ENSMUSG00000028945, ENSMUSG00000027669, ENSMUSG00000072235, ENSMUSG00000020929, ENSMUSG00000025499,…	1457	209	17446	1.43229	1	0.748747	68.7571
INTERPRO	IPR003595:Protein-tyrosine phosphatase, catalytic	10	0.539957	0.0686779	ENSMUSG00000033295, ENSMUSG00000030854, ENSMUSG00000055322, ENSMUSG00000028771, ENSMUSG00000024539, ENSMUSG00000038042, ENSMUSG00000020422, ENSMUSG00000028399, ENSMUSG00000028909, ENSMUSG00000039431	1681	63	20594	1.94461	1	0.967273	71.2528
GOTERM_BP_DIRECT	GO:0001843~neural tube closure	14	0.75594	0.0687796	ENSMUSG00000022568, ENSMUSG00000029050, ENSMUSG00000017009, ENSMUSG00000026121, ENSMUSG00000025235, ENSMUSG00000029276, ENSMUSG00000028266, ENSMUSG00000005034, ENSMUSG00000020173, ENSMUSG00000031523, ENSMUSG00000074227, ENSMUSG00000019979, ENSMUSG00000002496, ENSMUSG00000026556	1545	97	18082	1.68917	1	0.918019	73.5636
UP_KEYWORDS	Polymorphism	24	1.2959	0.0688222	ENSMUSG00000036352, ENSMUSG00000016995, ENSMUSG00000022451, ENSMUSG00000044573, ENSMUSG00000047215, ENSMUSG00000092607, ENSMUSG00000035547, ENSMUSG00000000751, ENSMUSG00000040697, ENSMUSG00000029434, ENSMUSG00000026670, ENSMUSG00000002459, ENSMUSG00000037872, ENSMUSG00000020167, ENSMUSG00000020432, ENSMUSG00000030302, ENSMUSG00000048251, ENSMUSG00000051518, ENSMUSG00000026959, ENSMUSG00000025534,…	1800	209	22680	1.44689	1	0.276429	63.2971
KEGG_PATHWAY	mmu01210:2-Oxocarboxylic acid metabolism	5	0.269978	0.0690632	ENSMUSG00000030268, ENSMUSG00000025950, ENSMUSG00000031672, ENSMUSG00000025190, ENSMUSG00000027406	646	19	7691	3.13305	1	0.330774	61.0781
GOTERM_MF_DIRECT	GO:0051537~2 iron, 2 sulfur cluster binding	6	0.323974	0.069554	ENSMUSG00000024099, ENSMUSG00000025968, ENSMUSG00000038462, ENSMUSG00000031781, ENSMUSG00000032051, ENSMUSG00000079677	1457	27	17446	2.66087	1	0.749206	69.3274
UP_SEQ_FEATURE	compositionally biased region:Poly-Gly	28	1.51188	0.0709086	ENSMUSG00000033006, ENSMUSG00000032803, ENSMUSG00000096847, ENSMUSG00000069171, ENSMUSG00000021743, ENSMUSG00000029471, ENSMUSG00000039615, ENSMUSG00000047013, ENSMUSG00000041740, ENSMUSG00000002413, ENSMUSG00000013858, ENSMUSG00000032875, ENSMUSG00000003316, ENSMUSG00000059208, ENSMUSG00000020457, ENSMUSG00000049532, ENSMUSG00000038255, ENSMUSG00000038780, ENSMUSG00000054874, ENSMUSG00000040857,…	1687	215	18012	1.39049	1	0.999982	73.9004
GOTERM_CC_DIRECT	GO:0008076~voltage-gated potassium channel complex	12	0.647948	0.0712072	ENSMUSG00000016346, ENSMUSG00000047976, ENSMUSG00000038077, ENSMUSG00000027895, ENSMUSG00000036438, ENSMUSG00000029088, ENSMUSG00000028931, ENSMUSG00000053519, ENSMUSG00000031078, ENSMUSG00000019370, ENSMUSG00000037624, ENSMUSG00000036815	1677	79	19662	1.78094	1	0.443332	67.7803
GOTERM_MF_DIRECT	GO:0016829~lyase activity	18	0.971922	0.0712939	ENSMUSG00000026526, ENSMUSG00000033910, ENSMUSG00000063275, ENSMUSG00000023452, ENSMUSG00000028684, ENSMUSG00000028179, ENSMUSG00000025745, ENSMUSG00000031536, ENSMUSG00000025153, ENSMUSG00000004267, ENSMUSG00000045316, ENSMUSG00000021536, ENSMUSG00000006517, ENSMUSG00000032067, ENSMUSG00000028005, ENSMUSG00000001666, ENSMUSG00000022994, ENSMUSG00000024039	1457	139	17446	1.55058	1	0.753167	70.2542
UP_SEQ_FEATURE	nucleotide phosphate-binding region:GTP	39	2.10583	0.0717183	ENSMUSG00000022722, ENSMUSG00000016349, ENSMUSG00000047842, ENSMUSG00000001847, ENSMUSG00000019173, ENSMUSG00000032562, ENSMUSG00000017144, ENSMUSG00000057455, ENSMUSG00000021700, ENSMUSG00000049892, ENSMUSG00000015961, ENSMUSG00000034789, ENSMUSG00000025035, ENSMUSG00000058672, ENSMUSG00000022789, ENSMUSG00000020457, ENSMUSG00000025170, ENSMUSG00000026202, ENSMUSG00000026825, ENSMUSG00000059811,…	1687	319	18012	1.30533	1	0.999974	74.3128
KEGG_PATHWAY	mmu00230:Purine metabolism	22	1.1879	0.0719978	ENSMUSG00000020471, ENSMUSG00000021684, ENSMUSG00000033910, ENSMUSG00000020736, ENSMUSG00000060579, ENSMUSG00000025575, ENSMUSG00000021536, ENSMUSG00000000776, ENSMUSG00000037601, ENSMUSG00000015961, ENSMUSG00000028005, ENSMUSG00000036315, ENSMUSG00000022994, ENSMUSG00000071662, ENSMUSG00000039058, ENSMUSG00000023961, ENSMUSG00000021236, ENSMUSG00000058624, ENSMUSG00000059173, ENSMUSG00000003500,…	646	179	7691	1.46325	1	0.336991	62.6652
GOTERM_MF_DIRECT	GO:0016671~oxidoreductase activity, acting on a sulfur group of donors, disulfide as acceptor	4	0.215983	0.0722068	ENSMUSG00000054733, ENSMUSG00000024583, ENSMUSG00000028367, ENSMUSG00000005354	1457	12	17446	3.99131	1	0.752899	70.7299
GOTERM_MF_DIRECT	GO:1990381~ubiquitin-specific protease binding	4	0.215983	0.0722068	ENSMUSG00000028964, ENSMUSG00000018974, ENSMUSG00000022365, ENSMUSG00000031751	1457	12	17446	3.99131	1	0.752899	70.7299
GOTERM_MF_DIRECT	GO:0004016~adenylate cyclase activity	4	0.215983	0.0722068	ENSMUSG00000028005, ENSMUSG00000022994, ENSMUSG00000033910, ENSMUSG00000021536	1457	12	17446	3.99131	1	0.752899	70.7299
UP_KEYWORDS	Kinase	68	3.67171	0.0722321	ENSMUSG00000037664, ENSMUSG00000024969, ENSMUSG00000002550, ENSMUSG00000025855, ENSMUSG00000053137, ENSMUSG00000029471, ENSMUSG00000041720, ENSMUSG00000002413, ENSMUSG00000071654, ENSMUSG00000021820, ENSMUSG00000042249, ENSMUSG00000053693, ENSMUSG00000024867, ENSMUSG00000003534, ENSMUSG00000028944, ENSMUSG00000057897, ENSMUSG00000020115, ENSMUSG00000001270, ENSMUSG00000030849, ENSMUSG00000037989,…	1800	707	22680	1.21188	1	0.285794	65.1418
UP_SEQ_FEATURE	region of interest:Membrane-binding amphipathic helix	3	0.161987	0.0723134	ENSMUSG00000037062, ENSMUSG00000003200, ENSMUSG00000026860	1687	5	18012	6.40616	1	0.999964	74.6119
UP_SEQ_FEATURE	site:Contributes to redox potential value	3	0.161987	0.0723134	ENSMUSG00000028367, ENSMUSG00000005354, ENSMUSG00000025130	1687	5	18012	6.40616	1	0.999964	74.6119
UP_SEQ_FEATURE	domain:MHD2	3	0.161987	0.0723134	ENSMUSG00000034799, ENSMUSG00000062151, ENSMUSG00000047507	1687	5	18012	6.40616	1	0.999964	74.6119
GOTERM_BP_DIRECT	GO:0051865~protein autoubiquitination	9	0.485961	0.0723478	ENSMUSG00000028557, ENSMUSG00000020496, ENSMUSG00000020390, ENSMUSG00000026792, ENSMUSG00000030788, ENSMUSG00000038876, ENSMUSG00000039615, ENSMUSG00000041740, ENSMUSG00000031751	1545	52	18082	2.02562	1	0.926763	75.3922
INTERPRO	IPR008942:ENTH/VHS	6	0.323974	0.0732351	ENSMUSG00000000538, ENSMUSG00000040446, ENSMUSG00000033419, ENSMUSG00000020541, ENSMUSG00000055371, ENSMUSG00000001036	1681	28	20594	2.62522	1	0.972186	73.6204
GOTERM_CC_DIRECT	GO:0030658~transport vesicle membrane	6	0.323974	0.0748115	ENSMUSG00000019590, ENSMUSG00000037852, ENSMUSG00000004319, ENSMUSG00000079657, ENSMUSG00000051343, ENSMUSG00000021248	1677	27	19662	2.60545	1	0.456928	69.6449
GOTERM_MF_DIRECT	GO:0016301~kinase activity	68	3.67171	0.0756327	ENSMUSG00000037664, ENSMUSG00000024969, ENSMUSG00000002550, ENSMUSG00000025855, ENSMUSG00000053137, ENSMUSG00000029471, ENSMUSG00000041720, ENSMUSG00000002413, ENSMUSG00000071654, ENSMUSG00000021820, ENSMUSG00000042249, ENSMUSG00000053693, ENSMUSG00000024867, ENSMUSG00000003534, ENSMUSG00000028944, ENSMUSG00000057897, ENSMUSG00000020115, ENSMUSG00000001270, ENSMUSG00000030849, ENSMUSG00000037989,…	1457	674	17446	1.20805	1	0.764694	72.4523
GOTERM_CC_DIRECT	GO:0030123~AP-3 adaptor complex	4	0.215983	0.0760019	ENSMUSG00000027291, ENSMUSG00000029434, ENSMUSG00000063801, ENSMUSG00000062444	1677	12	19662	3.90817	1	0.459109	70.2383
GOTERM_CC_DIRECT	GO:0031462~Cul2-RING ubiquitin ligase complex	4	0.215983	0.0760019	ENSMUSG00000055839, ENSMUSG00000051355, ENSMUSG00000029276, ENSMUSG00000051234	1677	12	19662	3.90817	1	0.459109	70.2383
GOTERM_BP_DIRECT	GO:0006120~mitochondrial electron transport, NADH to ubiquinone	4	0.215983	0.0763159	ENSMUSG00000024099, ENSMUSG00000026260, ENSMUSG00000025204, ENSMUSG00000021606	1545	12	18082	3.90119	1	0.935457	77.2849
GOTERM_BP_DIRECT	GO:1901673~regulation of mitotic spindle assembly	4	0.215983	0.0763159	ENSMUSG00000031971, ENSMUSG00000000743, ENSMUSG00000022604, ENSMUSG00000033916	1545	12	18082	3.90119	1	0.935457	77.2849
GOTERM_BP_DIRECT	GO:0010035~response to inorganic substance	4	0.215983	0.0763159	ENSMUSG00000016349, ENSMUSG00000020475, ENSMUSG00000051149, ENSMUSG00000026826	1545	12	18082	3.90119	1	0.935457	77.2849
GOTERM_BP_DIRECT	GO:0010447~response to acidic pH	4	0.215983	0.0763159	ENSMUSG00000004366, ENSMUSG00000020704, ENSMUSG00000000753, ENSMUSG00000021190	1545	12	18082	3.90119	1	0.935457	77.2849
GOTERM_BP_DIRECT	GO:1904322~cellular response to forskolin	4	0.215983	0.0763159	ENSMUSG00000022994, ENSMUSG00000029245, ENSMUSG00000032051, ENSMUSG00000021536	1545	12	18082	3.90119	1	0.935457	77.2849
GOTERM_BP_DIRECT	GO:0042416~dopamine biosynthetic process	4	0.215983	0.0763159	ENSMUSG00000025889, ENSMUSG00000000214, ENSMUSG00000061740, ENSMUSG00000026826	1545	12	18082	3.90119	1	0.935457	77.2849
UP_SEQ_FEATURE	metal ion-binding site:Iron-sulfur (2Fe-2S)	4	0.215983	0.0763674	ENSMUSG00000024099, ENSMUSG00000038462, ENSMUSG00000032051, ENSMUSG00000079677	1687	11	18012	3.88252	1	0.99997	76.5635
UP_KEYWORDS	Sarcoplasmic reticulum	7	0.37797	0.0767646	ENSMUSG00000021820, ENSMUSG00000027944, ENSMUSG00000003814, ENSMUSG00000034659, ENSMUSG00000028207, ENSMUSG00000020635, ENSMUSG00000057897	1800	38	22680	2.32105	1	0.298683	67.4608
INTERPRO	IPR001757:Cation-transporting P-type ATPase	7	0.37797	0.0769172	ENSMUSG00000030302, ENSMUSG00000040907, ENSMUSG00000038094, ENSMUSG00000032570, ENSMUSG00000037685, ENSMUSG00000026463, ENSMUSG00000027546	1681	37	20594	2.31776	1	0.975172	75.3976
INTERPRO	IPR018303:P-type ATPase, phosphorylation site	7	0.37797	0.0769172	ENSMUSG00000030302, ENSMUSG00000040907, ENSMUSG00000038094, ENSMUSG00000032570, ENSMUSG00000037685, ENSMUSG00000026463, ENSMUSG00000027546	1681	37	20594	2.31776	1	0.975172	75.3976
INTERPRO	IPR023299:P-type ATPase, cytoplasmic domain N	7	0.37797	0.0769172	ENSMUSG00000030302, ENSMUSG00000040907, ENSMUSG00000038094, ENSMUSG00000032570, ENSMUSG00000037685, ENSMUSG00000026463, ENSMUSG00000027546	1681	37	20594	2.31776	1	0.975172	75.3976
INTERPRO	IPR001496:SOCS protein, C-terminal	7	0.37797	0.0769172	ENSMUSG00000048175, ENSMUSG00000025170, ENSMUSG00000020027, ENSMUSG00000039911, ENSMUSG00000039483, ENSMUSG00000056153, ENSMUSG00000053113	1681	37	20594	2.31776	1	0.975172	75.3976
INTERPRO	IPR008250:P-type ATPase, A domain	7	0.37797	0.0769172	ENSMUSG00000030302, ENSMUSG00000040907, ENSMUSG00000038094, ENSMUSG00000032570, ENSMUSG00000037685, ENSMUSG00000026463, ENSMUSG00000027546	1681	37	20594	2.31776	1	0.975172	75.3976
GOTERM_BP_DIRECT	GO:0006635~fatty acid beta-oxidation	8	0.431965	0.0774954	ENSMUSG00000018574, ENSMUSG00000040374, ENSMUSG00000023832, ENSMUSG00000007783, ENSMUSG00000028127, ENSMUSG00000025745, ENSMUSG00000062480, ENSMUSG00000032047	1545	44	18082	2.12792	1	0.936817	77.8203
GOTERM_MF_DIRECT	GO:0043015~gamma-tubulin binding	6	0.323974	0.0791187	ENSMUSG00000037601, ENSMUSG00000033186, ENSMUSG00000018841, ENSMUSG00000051343, ENSMUSG00000051786, ENSMUSG00000057506	1457	28	17446	2.56584	1	0.77595	74.1068
GOTERM_BP_DIRECT	GO:0010976~positive regulation of neuron projection development	18	0.971922	0.0797425	ENSMUSG00000030854, ENSMUSG00000024969, ENSMUSG00000026925, ENSMUSG00000025147, ENSMUSG00000017802, ENSMUSG00000019194, ENSMUSG00000000753, ENSMUSG00000057455, ENSMUSG00000042453, ENSMUSG00000002489, ENSMUSG00000037601, ENSMUSG00000039145, ENSMUSG00000022674, ENSMUSG00000034675, ENSMUSG00000051149, ENSMUSG00000032475, ENSMUSG00000059456, ENSMUSG00000057897	1545	138	18082	1.52655	1	0.940518	78.8076
INTERPRO	IPR001666:Phosphatidylinositol transfer protein	3	0.161987	0.0799898	ENSMUSG00000040430, ENSMUSG00000029406, ENSMUSG00000040543	1681	6	20594	6.12552	1	0.97708	76.7937
INTERPRO	IPR008949:Terpenoid synthase	3	0.161987	0.0799898	ENSMUSG00000050323, ENSMUSG00000059743, ENSMUSG00000021273	1681	6	20594	6.12552	1	0.97708	76.7937
INTERPRO	IPR021816:Dedicator of cytokinesis C/D, N-terminal	3	0.161987	0.0799898	ENSMUSG00000028556, ENSMUSG00000038608, ENSMUSG00000032198	1681	6	20594	6.12552	1	0.97708	76.7937
INTERPRO	IPR008921:DNA polymerase III, clamp loader complex, gamma/delta/delta subunit, C-terminal	3	0.161987	0.0799898	ENSMUSG00000033970, ENSMUSG00000022881, ENSMUSG00000029363	1681	6	20594	6.12552	1	0.97708	76.7937
GOTERM_BP_DIRECT	GO:0016311~dephosphorylation	15	0.809935	0.0803561	ENSMUSG00000022040, ENSMUSG00000033295, ENSMUSG00000030854, ENSMUSG00000030002, ENSMUSG00000028771, ENSMUSG00000030203, ENSMUSG00000034616, ENSMUSG00000024539, ENSMUSG00000020736, ENSMUSG00000042662, ENSMUSG00000038042, ENSMUSG00000018648, ENSMUSG00000028399, ENSMUSG00000039431, ENSMUSG00000028909	1545	109	18082	1.61058	1	0.940501	79.0699
GOTERM_MF_DIRECT	GO:0019900~kinase binding	13	0.701944	0.0803864	ENSMUSG00000026626, ENSMUSG00000028964, ENSMUSG00000020932, ENSMUSG00000039615, ENSMUSG00000024997, ENSMUSG00000002489, ENSMUSG00000022105, ENSMUSG00000015869, ENSMUSG00000021948, ENSMUSG00000005312, ENSMUSG00000028785, ENSMUSG00000018849, ENSMUSG00000030246	1457	92	17446	1.69197	1	0.777006	74.6849
UP_KEYWORDS	Potassium transport	14	0.75594	0.080958	ENSMUSG00000016346, ENSMUSG00000047976, ENSMUSG00000038077, ENSMUSG00000040907, ENSMUSG00000026576, ENSMUSG00000027895, ENSMUSG00000044216, ENSMUSG00000028931, ENSMUSG00000029088, ENSMUSG00000017765, ENSMUSG00000041329, ENSMUSG00000053519, ENSMUSG00000038026, ENSMUSG00000037624	1800	107	22680	1.6486	1	0.310033	69.4778
UP_SEQ_FEATURE	calcium-binding region:4	5	0.269978	0.0810283	ENSMUSG00000036438, ENSMUSG00000003657, ENSMUSG00000021576, ENSMUSG00000019370, ENSMUSG00000019539	1687	18	18012	2.96582	1	0.999977	78.6319
GOTERM_BP_DIRECT	GO:0006665~sphingolipid metabolic process	7	0.37797	0.0821635	ENSMUSG00000023021, ENSMUSG00000021036, ENSMUSG00000000214, ENSMUSG00000021003, ENSMUSG00000032854, ENSMUSG00000021468, ENSMUSG00000017707	1545	36	18082	2.27569	1	0.943014	79.8247
GOTERM_BP_DIRECT	GO:0032543~mitochondrial translation	7	0.37797	0.0821635	ENSMUSG00000049960, ENSMUSG00000026273, ENSMUSG00000037531, ENSMUSG00000020477, ENSMUSG00000054312, ENSMUSG00000014551, ENSMUSG00000045948	1545	36	18082	2.27569	1	0.943014	79.8247
GOTERM_BP_DIRECT	GO:0007050~cell cycle arrest	12	0.647948	0.082808	ENSMUSG00000037664, ENSMUSG00000022105, ENSMUSG00000026667, ENSMUSG00000029161, ENSMUSG00000044820, ENSMUSG00000004936, ENSMUSG00000025499, ENSMUSG00000003814, ENSMUSG00000039128, ENSMUSG00000014402, ENSMUSG00000075334, ENSMUSG00000096472	1545	81	18082	1.73386	1	0.943046	80.0876
INTERPRO	IPR024156:Small GTPase superfamily, ARF type	6	0.323974	0.0828232	ENSMUSG00000022722, ENSMUSG00000025035, ENSMUSG00000051853, ENSMUSG00000049866, ENSMUSG00000057594, ENSMUSG00000032553	1681	29	20594	2.5347	1	0.978539	78.0146
GOTERM_MF_DIRECT	GO:0016151~nickel cation binding	3	0.161987	0.0832837	ENSMUSG00000058135, ENSMUSG00000060579, ENSMUSG00000023030	1457	6	17446	5.98696	1	0.784894	75.9612
GOTERM_BP_DIRECT	GO:0055085~transmembrane transport	40	2.15983	0.0834441	ENSMUSG00000002105, ENSMUSG00000016346, ENSMUSG00000026791, ENSMUSG00000004319, ENSMUSG00000029924, ENSMUSG00000031974, ENSMUSG00000029151, ENSMUSG00000022843, ENSMUSG00000024327, ENSMUSG00000063652, ENSMUSG00000038267, ENSMUSG00000020744, ENSMUSG00000064329, ENSMUSG00000021240, ENSMUSG00000038212, ENSMUSG00000025759, ENSMUSG00000017765, ENSMUSG00000042078, ENSMUSG00000041654, ENSMUSG00000024270,…	1545	364	18082	1.28611	1	0.94306	80.3438
INTERPRO	IPR016039:Thiolase-like	4	0.215983	0.0836182	ENSMUSG00000023832, ENSMUSG00000062480, ENSMUSG00000025153, ENSMUSG00000032047	1681	13	20594	3.76955	1	0.977812	78.3461
KEGG_PATHWAY	mmu04114:Oocyte meiosis	15	0.809935	0.0844853	ENSMUSG00000026626, ENSMUSG00000004936, ENSMUSG00000020415, ENSMUSG00000005034, ENSMUSG00000019370, ENSMUSG00000021536, ENSMUSG00000022994, ENSMUSG00000036438, ENSMUSG00000021820, ENSMUSG00000051391, ENSMUSG00000021816, ENSMUSG00000014355, ENSMUSG00000002068, ENSMUSG00000057897, ENSMUSG00000022285	646	112	7691	1.5945	1	0.378711	68.7727
GOTERM_CC_DIRECT	GO:0097225~sperm midpiece	5	0.269978	0.0849259	ENSMUSG00000000682, ENSMUSG00000042249, ENSMUSG00000037196, ENSMUSG00000016637, ENSMUSG00000015837	1677	20	19662	2.93113	1	0.495047	74.3531
GOTERM_CC_DIRECT	GO:0001891~phagocytic cup	5	0.269978	0.0849259	ENSMUSG00000024397, ENSMUSG00000001847, ENSMUSG00000030707, ENSMUSG00000052298, ENSMUSG00000068923	1677	20	19662	2.93113	1	0.495047	74.3531
KEGG_PATHWAY	mmu03008:Ribosome biogenesis in eukaryotes	12	0.647948	0.0853138	ENSMUSG00000063480, ENSMUSG00000021418, ENSMUSG00000029715, ENSMUSG00000027613, ENSMUSG00000051062, ENSMUSG00000030521, ENSMUSG00000046707, ENSMUSG00000018040, ENSMUSG00000036114, ENSMUSG00000049950, ENSMUSG00000028010, ENSMUSG00000004268	646	83	7691	1.72129	1	0.375993	69.1433
GOTERM_BP_DIRECT	GO:0090398~cellular senescence	5	0.269978	0.0853452	ENSMUSG00000021948, ENSMUSG00000004936, ENSMUSG00000025499, ENSMUSG00000020644, ENSMUSG00000003814	1545	20	18082	2.92589	1	0.945586	81.0912
GOTERM_BP_DIRECT	GO:0046928~regulation of neurotransmitter secretion	5	0.269978	0.0853452	ENSMUSG00000025889, ENSMUSG00000039714, ENSMUSG00000027895, ENSMUSG00000023064, ENSMUSG00000062995	1545	20	18082	2.92589	1	0.945586	81.0912
GOTERM_BP_DIRECT	GO:0050770~regulation of axonogenesis	6	0.323974	0.0854625	ENSMUSG00000024969, ENSMUSG00000030093, ENSMUSG00000034616, ENSMUSG00000026959, ENSMUSG00000047712, ENSMUSG00000056486	1545	28	18082	2.50791	1	0.944574	81.1364
GOTERM_BP_DIRECT	GO:0051881~regulation of mitochondrial membrane potential	6	0.323974	0.0854625	ENSMUSG00000025968, ENSMUSG00000028964, ENSMUSG00000028756, ENSMUSG00000025140, ENSMUSG00000024997, ENSMUSG00000028982	1545	28	18082	2.50791	1	0.944574	81.1364
GOTERM_BP_DIRECT	GO:0045921~positive regulation of exocytosis	6	0.323974	0.0854625	ENSMUSG00000054423, ENSMUSG00000022159, ENSMUSG00000017978, ENSMUSG00000054459, ENSMUSG00000042632, ENSMUSG00000026797	1545	28	18082	2.50791	1	0.944574	81.1364
GOTERM_BP_DIRECT	GO:0048169~regulation of long-term neuronal synaptic plasticity	6	0.323974	0.0854625	ENSMUSG00000025889, ENSMUSG00000041670, ENSMUSG00000026959, ENSMUSG00000025499, ENSMUSG00000031980, ENSMUSG00000057897	1545	28	18082	2.50791	1	0.944574	81.1364
GOTERM_BP_DIRECT	GO:0051291~protein heterooligomerization	13	0.701944	0.0860249	ENSMUSG00000063882, ENSMUSG00000004936, ENSMUSG00000020428, ENSMUSG00000002413, ENSMUSG00000057367, ENSMUSG00000033916, ENSMUSG00000027950, ENSMUSG00000035864, ENSMUSG00000028931, ENSMUSG00000025499, ENSMUSG00000002496, ENSMUSG00000015837, ENSMUSG00000037316	1545	91	18082	1.67194	1	0.944436	81.3519
UP_SEQ_FEATURE	domain:EF-hand 2	23	1.2419	0.0860776	ENSMUSG00000027347, ENSMUSG00000009075, ENSMUSG00000039824, ENSMUSG00000030824, ENSMUSG00000019370, ENSMUSG00000038212, ENSMUSG00000034868, ENSMUSG00000029544, ENSMUSG00000037493, ENSMUSG00000056071, ENSMUSG00000005716, ENSMUSG00000036438, ENSMUSG00000029161, ENSMUSG00000003657, ENSMUSG00000054459, ENSMUSG00000029088, ENSMUSG00000053519, ENSMUSG00000021576, ENSMUSG00000015143, ENSMUSG00000028785,…	1687	173	18012	1.41948	1	0.999983	80.6775
KEGG_PATHWAY	mmu00480:Glutathione metabolism	9	0.485961	0.0861872	ENSMUSG00000002797, ENSMUSG00000058135, ENSMUSG00000026688, ENSMUSG00000001663, ENSMUSG00000027603, ENSMUSG00000068762, ENSMUSG00000028961, ENSMUSG00000022562, ENSMUSG00000025950	646	55	7691	1.94818	1	0.373529	69.5295
GOTERM_MF_DIRECT	GO:0042802~identical protein binding	63	3.40173	0.0862348	ENSMUSG00000074513, ENSMUSG00000060579, ENSMUSG00000026670, ENSMUSG00000079478, ENSMUSG00000025140, ENSMUSG00000002413, ENSMUSG00000041775, ENSMUSG00000019979, ENSMUSG00000000743, ENSMUSG00000030350, ENSMUSG00000059811, ENSMUSG00000032733, ENSMUSG00000036840, ENSMUSG00000021025, ENSMUSG00000024914, ENSMUSG00000025153, ENSMUSG00000030707, ENSMUSG00000020184, ENSMUSG00000025190, ENSMUSG00000025889,…	1457	625	17446	1.20697	1	0.792559	77.1988
GOTERM_CC_DIRECT	GO:0000127~transcription factor TFIIIC complex	3	0.161987	0.0864587	ENSMUSG00000032777, ENSMUSG00000026816, ENSMUSG00000106864	1677	6	19662	5.86225	1	0.498175	75.0039
GOTERM_CC_DIRECT	GO:0042584~chromaffin granule membrane	3	0.161987	0.0864587	ENSMUSG00000037685, ENSMUSG00000035864, ENSMUSG00000021814	1677	6	19662	5.86225	1	0.498175	75.0039
GOTERM_CC_DIRECT	GO:0005746~mitochondrial respiratory chain	3	0.161987	0.0864587	ENSMUSG00000048967, ENSMUSG00000032330, ENSMUSG00000049387, ENSMUSG00000036199	1677	6	19662	5.86225	1	0.498175	75.0039
INTERPRO	IPR000591:DEP domain	5	0.269978	0.0865831	ENSMUSG00000020599, ENSMUSG00000041762, ENSMUSG00000022469, ENSMUSG00000039621, ENSMUSG00000026527	1681	21	20594	2.91691	1	0.979302	79.5414
GOTERM_BP_DIRECT	GO:0048858~cell projection morphogenesis	3	0.161987	0.0867219	ENSMUSG00000016664, ENSMUSG00000022972, ENSMUSG00000057897	1545	6	18082	5.85178	1	0.944562	81.6156
GOTERM_BP_DIRECT	GO:0008635~activation of cysteine-type endopeptidase activity involved in apoptotic process by cytochrome c	3	0.161987	0.0867219	ENSMUSG00000029433, ENSMUSG00000019979, ENSMUSG00000063694	1545	6	18082	5.85178	1	0.944562	81.6156
GOTERM_BP_DIRECT	GO:0071577~zinc II ion transmembrane transport	3	0.161987	0.0867219	ENSMUSG00000024270, ENSMUSG00000002105, ENSMUSG00000024327	1545	6	18082	5.85178	1	0.944562	81.6156
GOTERM_BP_DIRECT	GO:0051084~'de novo' posttranslational protein folding	3	0.161987	0.0867219	ENSMUSG00000034203, ENSMUSG00000037062, ENSMUSG00000021236	1545	6	18082	5.85178	1	0.944562	81.6156
GOTERM_BP_DIRECT	GO:1902083~negative regulation of peptidyl-cysteine S-nitrosylation	3	0.161987	0.0867219	ENSMUSG00000026463, ENSMUSG00000039697, ENSMUSG00000027488	1545	6	18082	5.85178	1	0.944562	81.6156
GOTERM_BP_DIRECT	GO:0006531~aspartate metabolic process	3	0.161987	0.0867219	ENSMUSG00000015961, ENSMUSG00000031672, ENSMUSG00000025190	1545	6	18082	5.85178	1	0.944562	81.6156
GOTERM_BP_DIRECT	GO:1902305~regulation of sodium ion transmembrane transport	3	0.161987	0.0867219	ENSMUSG00000026463, ENSMUSG00000022523, ENSMUSG00000027488	1545	6	18082	5.85178	1	0.944562	81.6156
GOTERM_BP_DIRECT	GO:0048562~embryonic organ morphogenesis	3	0.161987	0.0867219	ENSMUSG00000034701, ENSMUSG00000030849, ENSMUSG00000024990	1545	6	18082	5.85178	1	0.944562	81.6156
GOTERM_BP_DIRECT	GO:0030913~paranodal junction assembly	3	0.161987	0.0867219	ENSMUSG00000026442, ENSMUSG00000030342, ENSMUSG00000032854	1545	6	18082	5.85178	1	0.944562	81.6156
GOTERM_BP_DIRECT	GO:0070995~NADPH oxidation	3	0.161987	0.0867219	ENSMUSG00000028931, ENSMUSG00000032051, ENSMUSG00000040181	1545	6	18082	5.85178	1	0.944562	81.6156
BIOCARTA	m_pgc1aPathway:Regulation of PGC-1a	5	0.269978	0.0884951	ENSMUSG00000029167, ENSMUSG00000024955, ENSMUSG00000021816, ENSMUSG00000019370, ENSMUSG00000057897	126	18	1289	2.84171	1	0.999886	68.574
UP_SEQ_FEATURE	metal ion-binding site:Calcium 2	10	0.539957	0.0889366	ENSMUSG00000029544, ENSMUSG00000022887, ENSMUSG00000022421, ENSMUSG00000025582, ENSMUSG00000089715, ENSMUSG00000035864, ENSMUSG00000024261, ENSMUSG00000030530, ENSMUSG00000004961, ENSMUSG00000068923	1687	58	18012	1.84085	1	0.999982	81.7521
GOTERM_MF_DIRECT	GO:0005184~neuropeptide hormone activity	6	0.323974	0.0893478	ENSMUSG00000045573, ENSMUSG00000021647, ENSMUSG00000032532, ENSMUSG00000019890, ENSMUSG00000026241, ENSMUSG00000028971	1457	29	17446	2.47736	1	0.800412	78.4394
GOTERM_CC_DIRECT	GO:0005654~nucleoplasm	182	9.82721	0.0898228	ENSMUSG00000020471, ENSMUSG00000001518, ENSMUSG00000031781, ENSMUSG00000006906, ENSMUSG00000053137, ENSMUSG00000025104, ENSMUSG00000027968, ENSMUSG00000051234, ENSMUSG00000056429, ENSMUSG00000024824, ENSMUSG00000026946, ENSMUSG00000020262, ENSMUSG00000060639, ENSMUSG00000051518, ENSMUSG00000032040, ENSMUSG00000024826, ENSMUSG00000037373, ENSMUSG00000038042, ENSMUSG00000040536, ENSMUSG00000034891,…	1677	1935	19662	1.10277	1	0.508749	76.3786
GOTERM_BP_DIRECT	GO:0031338~regulation of vesicle fusion	7	0.37797	0.091339	ENSMUSG00000052302, ENSMUSG00000023923, ENSMUSG00000024261, ENSMUSG00000003134, ENSMUSG00000042216, ENSMUSG00000042492, ENSMUSG00000039976	1545	37	18082	2.21419	1	0.951731	83.2755
GOTERM_BP_DIRECT	GO:0031648~protein destabilization	7	0.37797	0.091339	ENSMUSG00000036840, ENSMUSG00000025889, ENSMUSG00000040374, ENSMUSG00000051355, ENSMUSG00000022365, ENSMUSG00000020238, ENSMUSG00000020184	1545	37	18082	2.21419	1	0.951731	83.2755
GOTERM_BP_DIRECT	GO:0050808~synapse organization	7	0.37797	0.091339	ENSMUSG00000034891, ENSMUSG00000025889, ENSMUSG00000030302, ENSMUSG00000030093, ENSMUSG00000026442, ENSMUSG00000023064, ENSMUSG00000051790	1545	37	18082	2.21419	1	0.951731	83.2755
GOTERM_BP_DIRECT	GO:0008306~associative learning	7	0.37797	0.091339	ENSMUSG00000042453, ENSMUSG00000038255, ENSMUSG00000027950, ENSMUSG00000055078, ENSMUSG00000053310, ENSMUSG00000026959, ENSMUSG00000030720	1545	37	18082	2.21419	1	0.951731	83.2755
GOTERM_CC_DIRECT	GO:0030133~transport vesicle	10	0.539957	0.0920627	ENSMUSG00000021252, ENSMUSG00000025582, ENSMUSG00000059361, ENSMUSG00000032182, ENSMUSG00000028029, ENSMUSG00000032570, ENSMUSG00000048978, ENSMUSG00000019890, ENSMUSG00000029428, ENSMUSG00000028789	1677	64	19662	1.83195	1	0.514476	77.2543
GOTERM_CC_DIRECT	GO:0005776~autophagosome	10	0.539957	0.0920627	ENSMUSG00000023923, ENSMUSG00000034789, ENSMUSG00000042628, ENSMUSG00000033124, ENSMUSG00000002265, ENSMUSG00000030720, ENSMUSG00000029434, ENSMUSG00000005312, ENSMUSG00000038520, ENSMUSG00000015837	1677	64	19662	1.83195	1	0.514476	77.2543
GOTERM_MF_DIRECT	GO:0030234~enzyme regulator activity	5	0.269978	0.092414	ENSMUSG00000030785, ENSMUSG00000036438, ENSMUSG00000015869, ENSMUSG00000035078, ENSMUSG00000019370	1457	21	17446	2.85093	1	0.80765	79.5991
INTERPRO	IPR000073:Alpha/beta hydrolase fold-1	6	0.323974	0.0930394	ENSMUSG00000022040, ENSMUSG00000007950, ENSMUSG00000002475, ENSMUSG00000033157, ENSMUSG00000024781, ENSMUSG00000038776	1681	30	20594	2.45021	1	0.98354	81.9324
GOTERM_MF_DIRECT	GO:0051087~chaperone binding	11	0.593952	0.0931391	ENSMUSG00000004880, ENSMUSG00000043510, ENSMUSG00000049792, ENSMUSG00000024309, ENSMUSG00000040907, ENSMUSG00000028416, ENSMUSG00000024966, ENSMUSG00000021079, ENSMUSG00000037196, ENSMUSG00000031751, ENSMUSG00000037316	1457	75	17446	1.75617	1	0.806262	79.8646
GOTERM_BP_DIRECT	GO:0006779~porphyrin-containing compound biosynthetic process	4	0.215983	0.0931411	ENSMUSG00000028684, ENSMUSG00000062729, ENSMUSG00000023030, ENSMUSG00000032126	1545	13	18082	3.6011	1	0.953603	83.884
GOTERM_BP_DIRECT	GO:0045651~positive regulation of macrophage differentiation	4	0.215983	0.0931411	ENSMUSG00000022105, ENSMUSG00000014599, ENSMUSG00000020644, ENSMUSG00000031750	1545	13	18082	3.6011	1	0.953603	83.884
GOTERM_BP_DIRECT	GO:0016024~CDP-diacylglycerol biosynthetic process	4	0.215983	0.0931411	ENSMUSG00000024978, ENSMUSG00000001211, ENSMUSG00000030316, ENSMUSG00000031545	1545	13	18082	3.6011	1	0.953603	83.884
GOTERM_BP_DIRECT	GO:0042407~cristae formation	4	0.215983	0.0931411	ENSMUSG00000005299, ENSMUSG00000071654, ENSMUSG00000049760, ENSMUSG00000030086	1545	13	18082	3.6011	1	0.953603	83.884
GOTERM_MF_DIRECT	GO:0005544~calcium-dependent phospholipid binding	8	0.431965	0.0933072	ENSMUSG00000035864, ENSMUSG00000027712, ENSMUSG00000021814, ENSMUSG00000024261, ENSMUSG00000020848, ENSMUSG00000058420, ENSMUSG00000029608, ENSMUSG00000004961	1457	47	17446	2.03811	1	0.802904	79.9257
UP_KEYWORDS	Heme biosynthesis	4	0.215983	0.0938876	ENSMUSG00000018677, ENSMUSG00000028684, ENSMUSG00000062729, ENSMUSG00000032126	1800	14	22680	3.6	1	0.348792	74.9896
UP_SEQ_FEATURE	metal ion-binding site:Magnesium	16	0.863931	0.0939964	ENSMUSG00000022040, ENSMUSG00000022722, ENSMUSG00000040907, ENSMUSG00000038094, ENSMUSG00000032570, ENSMUSG00000037685, ENSMUSG00000020736, ENSMUSG00000027546, ENSMUSG00000004267, ENSMUSG00000020917, ENSMUSG00000015961, ENSMUSG00000029544, ENSMUSG00000030302, ENSMUSG00000025035, ENSMUSG00000034187, ENSMUSG00000028945	1687	111	18012	1.53902	1	0.999987	83.5169
INTERPRO	IPR005828:General substrate transporter	7	0.37797	0.0942595	ENSMUSG00000026791, ENSMUSG00000042078, ENSMUSG00000063652, ENSMUSG00000022199, ENSMUSG00000038267, ENSMUSG00000018900, ENSMUSG00000053025	1681	39	20594	2.1989	1	0.983267	82.3536
UP_SEQ_FEATURE	domain:DRBM 1	4	0.215983	0.094987	ENSMUSG00000026915, ENSMUSG00000020262, ENSMUSG00000025920, ENSMUSG00000039536	1687	12	18012	3.55898	1	0.999983	83.843
UP_SEQ_FEATURE	domain:PPIase FKBP-type	4	0.215983	0.094987	ENSMUSG00000020949, ENSMUSG00000056629, ENSMUSG00000020635, ENSMUSG00000066151	1687	12	18012	3.55898	1	0.999983	83.843
UP_SEQ_FEATURE	domain:DRBM 2	4	0.215983	0.094987	ENSMUSG00000026915, ENSMUSG00000020262, ENSMUSG00000025920, ENSMUSG00000039536	1687	12	18012	3.55898	1	0.999983	83.843
UP_SEQ_FEATURE	domain:CBS 1	5	0.269978	0.0953642	ENSMUSG00000004319, ENSMUSG00000022843, ENSMUSG00000003500, ENSMUSG00000028944, ENSMUSG00000029016	1687	19	18012	2.80972	1	0.999977	83.9655
UP_SEQ_FEATURE	domain:CBS 2	5	0.269978	0.0953642	ENSMUSG00000004319, ENSMUSG00000022843, ENSMUSG00000003500, ENSMUSG00000028944, ENSMUSG00000029016	1687	19	18012	2.80972	1	0.999977	83.9655
GOTERM_BP_DIRECT	GO:0006099~tricarboxylic acid cycle	6	0.323974	0.0963667	ENSMUSG00000021748, ENSMUSG00000026526, ENSMUSG00000000171, ENSMUSG00000020321, ENSMUSG00000025950, ENSMUSG00000027406	1545	29	18082	2.42143	1	0.957518	84.9213
GOTERM_BP_DIRECT	GO:0090102~cochlea development	6	0.323974	0.0963667	ENSMUSG00000030302, ENSMUSG00000055078, ENSMUSG00000038248, ENSMUSG00000026556, ENSMUSG00000016637, ENSMUSG00000037624	1545	29	18082	2.42143	1	0.957518	84.9213
GOTERM_BP_DIRECT	GO:0035249~synaptic transmission, glutamatergic	6	0.323974	0.0963667	ENSMUSG00000027438, ENSMUSG00000017412, ENSMUSG00000034799, ENSMUSG00000004319, ENSMUSG00000026959, ENSMUSG00000024873	1545	29	18082	2.42143	1	0.957518	84.9213
UP_SEQ_FEATURE	domain:EF-hand 4	10	0.539957	0.0966905	ENSMUSG00000029544, ENSMUSG00000036438, ENSMUSG00000003657, ENSMUSG00000054459, ENSMUSG00000029088, ENSMUSG00000053519, ENSMUSG00000028785, ENSMUSG00000021576, ENSMUSG00000019370, ENSMUSG00000019539	1687	59	18012	1.80965	1	0.999973	84.3895
KEGG_PATHWAY	mmu03010:Ribosome	18	0.971922	0.0985167	ENSMUSG00000049960, ENSMUSG00000033845, ENSMUSG00000034892, ENSMUSG00000047215, ENSMUSG00000060036, ENSMUSG00000015672, ENSMUSG00000054312, ENSMUSG00000061787, ENSMUSG00000062006, ENSMUSG00000045948, ENSMUSG00000052962, ENSMUSG00000045128, ENSMUSG00000049751, ENSMUSG00000050621, ENSMUSG00000028495, ENSMUSG00000093674, ENSMUSG00000058600, ENSMUSG00000022370	646	145	7691	1.47793	1	0.410318	74.5264
GOTERM_CC_DIRECT	GO:0043234~protein complex	64	3.45572	0.098579	ENSMUSG00000016346, ENSMUSG00000030218, ENSMUSG00000024862, ENSMUSG00000024966, ENSMUSG00000027488, ENSMUSG00000034868, ENSMUSG00000020538, ENSMUSG00000091971, ENSMUSG00000005716, ENSMUSG00000060639, ENSMUSG00000015869, ENSMUSG00000022789, ENSMUSG00000038412, ENSMUSG00000046442, ENSMUSG00000002496, ENSMUSG00000022604, ENSMUSG00000024411, ENSMUSG00000021025, ENSMUSG00000031557, ENSMUSG00000031751,…	1677	628	19662	1.19485	1	0.536597	79.6325
GOTERM_BP_DIRECT	GO:0000302~response to reactive oxygen species	5	0.269978	0.0986287	ENSMUSG00000029167, ENSMUSG00000018585, ENSMUSG00000027187, ENSMUSG00000035984, ENSMUSG00000026701	1545	21	18082	2.78656	1	0.959757	85.6106
INTERPRO	IPR003903:Ubiquitin interacting motif	5	0.269978	0.0993093	ENSMUSG00000040351, ENSMUSG00000005986, ENSMUSG00000005625, ENSMUSG00000055371, ENSMUSG00000001036	1681	22	20594	2.78433	1	0.985691	84.0002
GOTERM_BP_DIRECT	GO:0045666~positive regulation of neuron differentiation	14	0.75594	0.0994756	ENSMUSG00000038255, ENSMUSG00000034701, ENSMUSG00000021743, ENSMUSG00000013089, ENSMUSG00000022508, ENSMUSG00000041120, ENSMUSG00000039533, ENSMUSG00000020167, ENSMUSG00000027434, ENSMUSG00000010086, ENSMUSG00000057778, ENSMUSG00000020027, ENSMUSG00000042182, ENSMUSG00000024163	1545	103	18082	1.59078	1	0.959968	85.8609
UP_KEYWORDS	Iron	38	2.05184	0.0999749	ENSMUSG00000037916, ENSMUSG00000025968, ENSMUSG00000031781, ENSMUSG00000027618, ENSMUSG00000001467, ENSMUSG00000028207, ENSMUSG00000029475, ENSMUSG00000026279, ENSMUSG00000019590, ENSMUSG00000044795, ENSMUSG00000058709, ENSMUSG00000000171, ENSMUSG00000061740, ENSMUSG00000057134, ENSMUSG00000020810, ENSMUSG00000031604, ENSMUSG00000024039, ENSMUSG00000037499, ENSMUSG00000059734, ENSMUSG00000024099,…	1800	375	22680	1.2768	1	0.364647	77.2505
